# Supplementary material
Source: PubMed Central journal article supplement (PMC2645437)

**Ag-Catalyzed Diastereo- and Enantioselective Vinylogous  
Mannich Reactions of  $\alpha$ -Ketoimine Esters.  
Development of a Method and Investigation of its Mechanism**

Laura C. Wieland, Erika Vieira, Marc L. Snapper\*, and Amir H. Hoveyda\*

*Department of Chemistry, Merkert Chemistry Center, Boston College, Chestnut Hill, Massachusetts 02467*

**SUPPORTING INFORMATION, PART 2**

| <b><i>Table of Contents</i></b>                                                 | <b><i>Page</i></b> |
|---------------------------------------------------------------------------------|--------------------|
| <i>NMR data for ketoimines 4a-4l, 15</i>                                        | S2                 |
| <i>NMR data for ketoimines for Mannich products 7a-7h, 7j-7k, 8i-8j, 17-18</i>  | S28                |
| <i>NMR data for unprotected amine product 9 and reduction products 10a, 10l</i> | S58                |
| <i>NMR data for AgOAc-1 complexes</i>                                           | S64                |
| <i>NMR data for phosphine ligand 16</i>                                         | S75                |

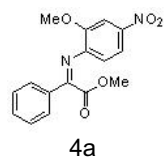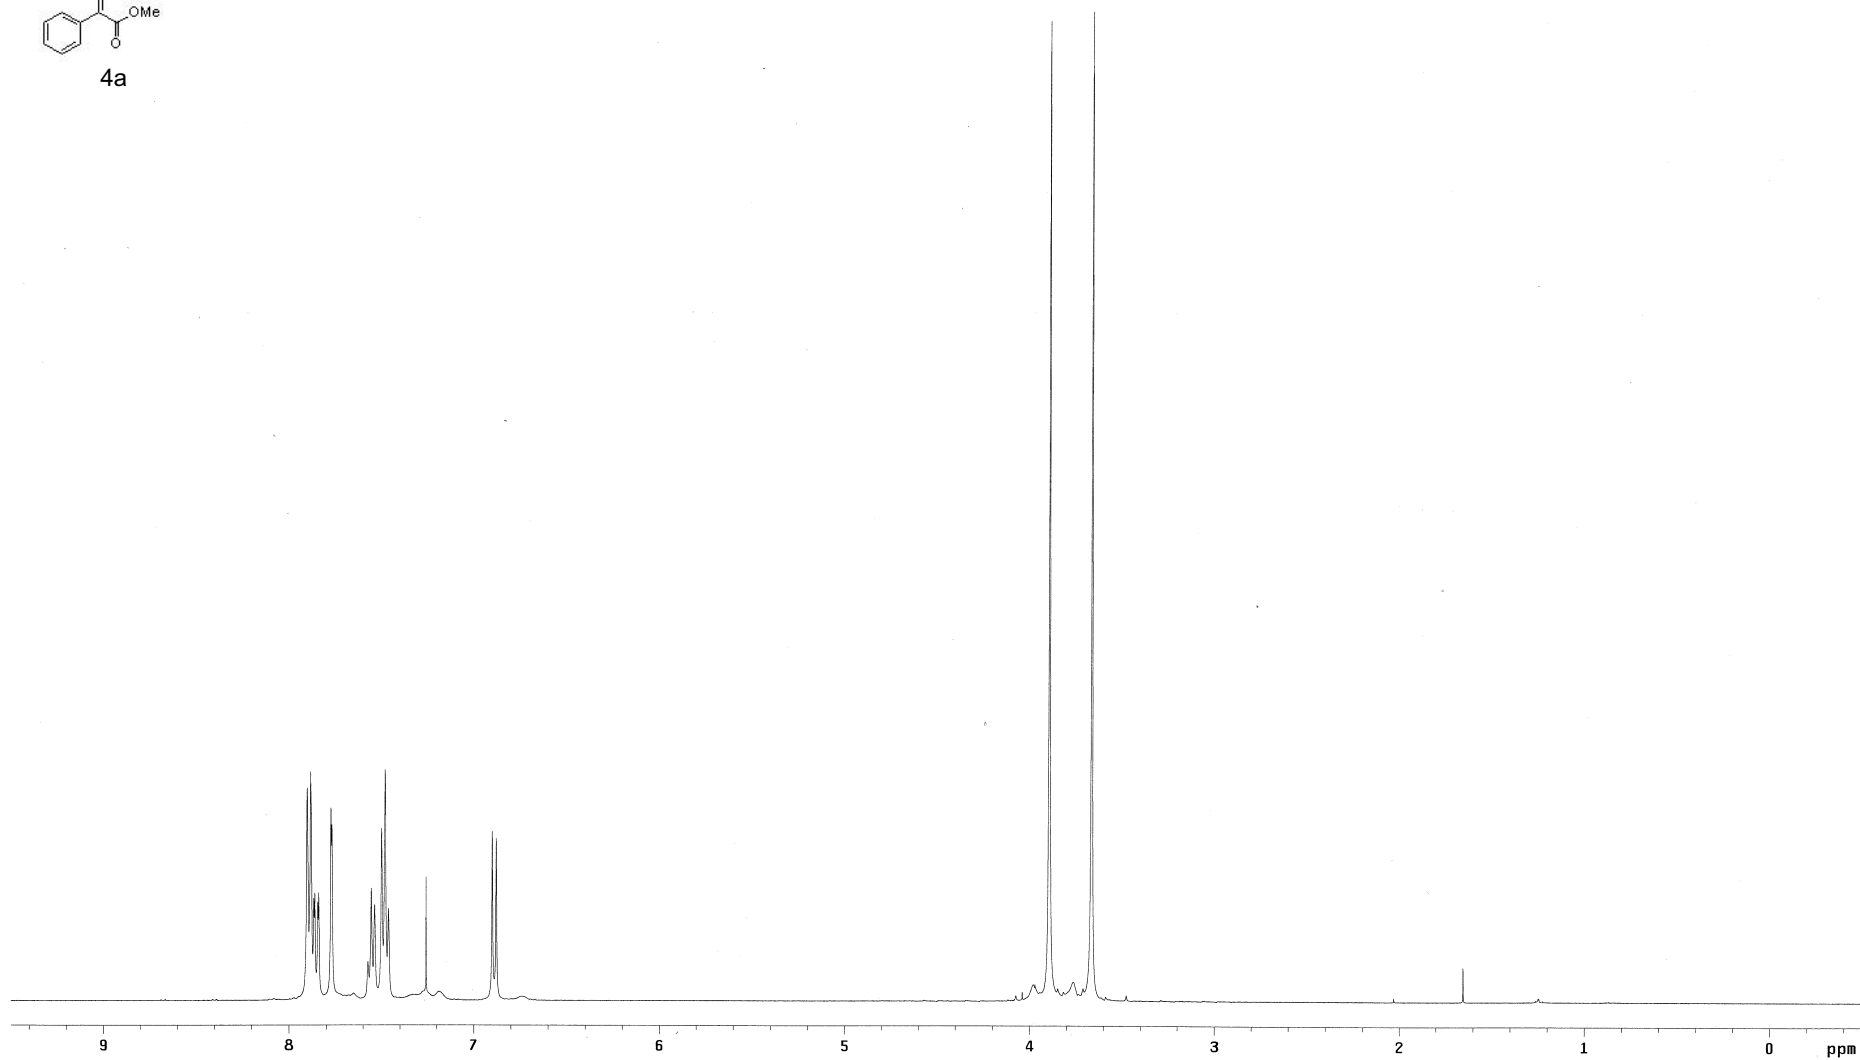

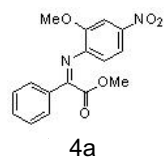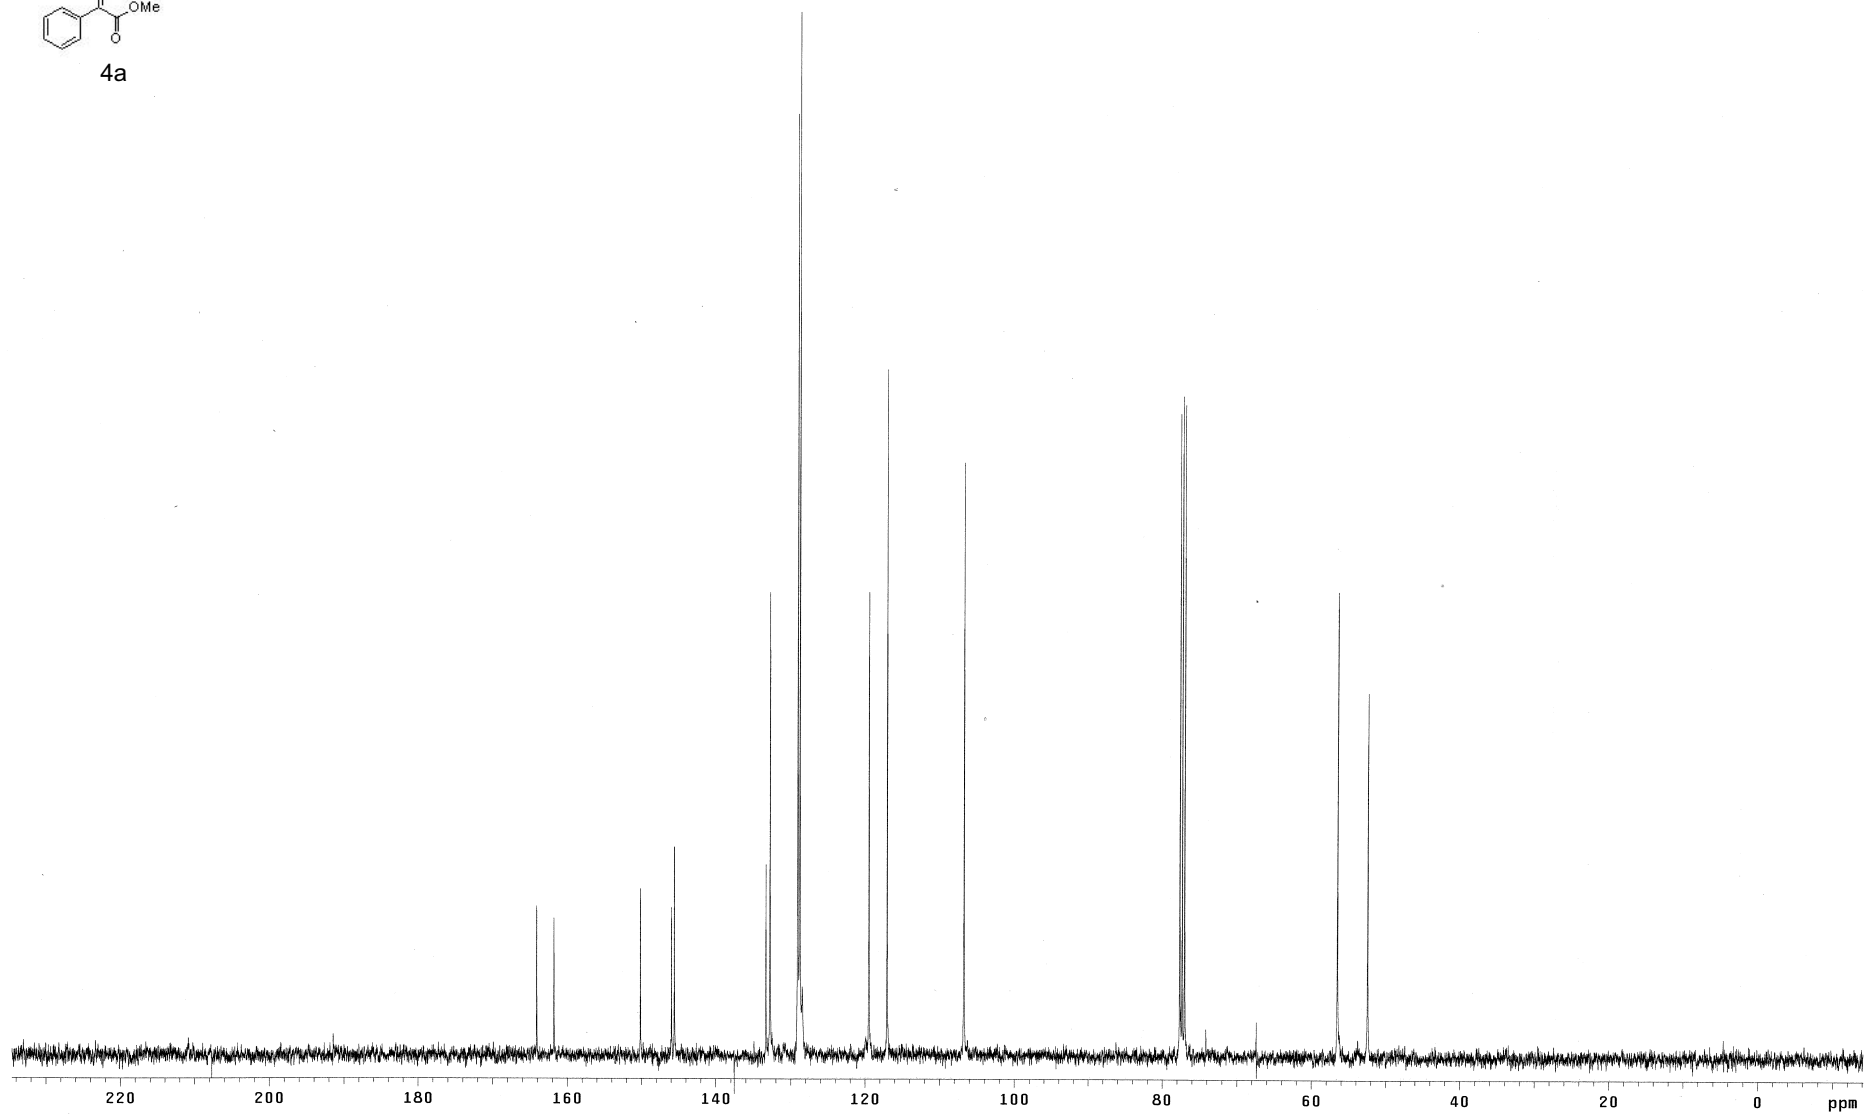

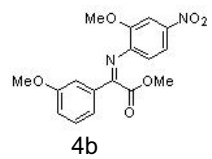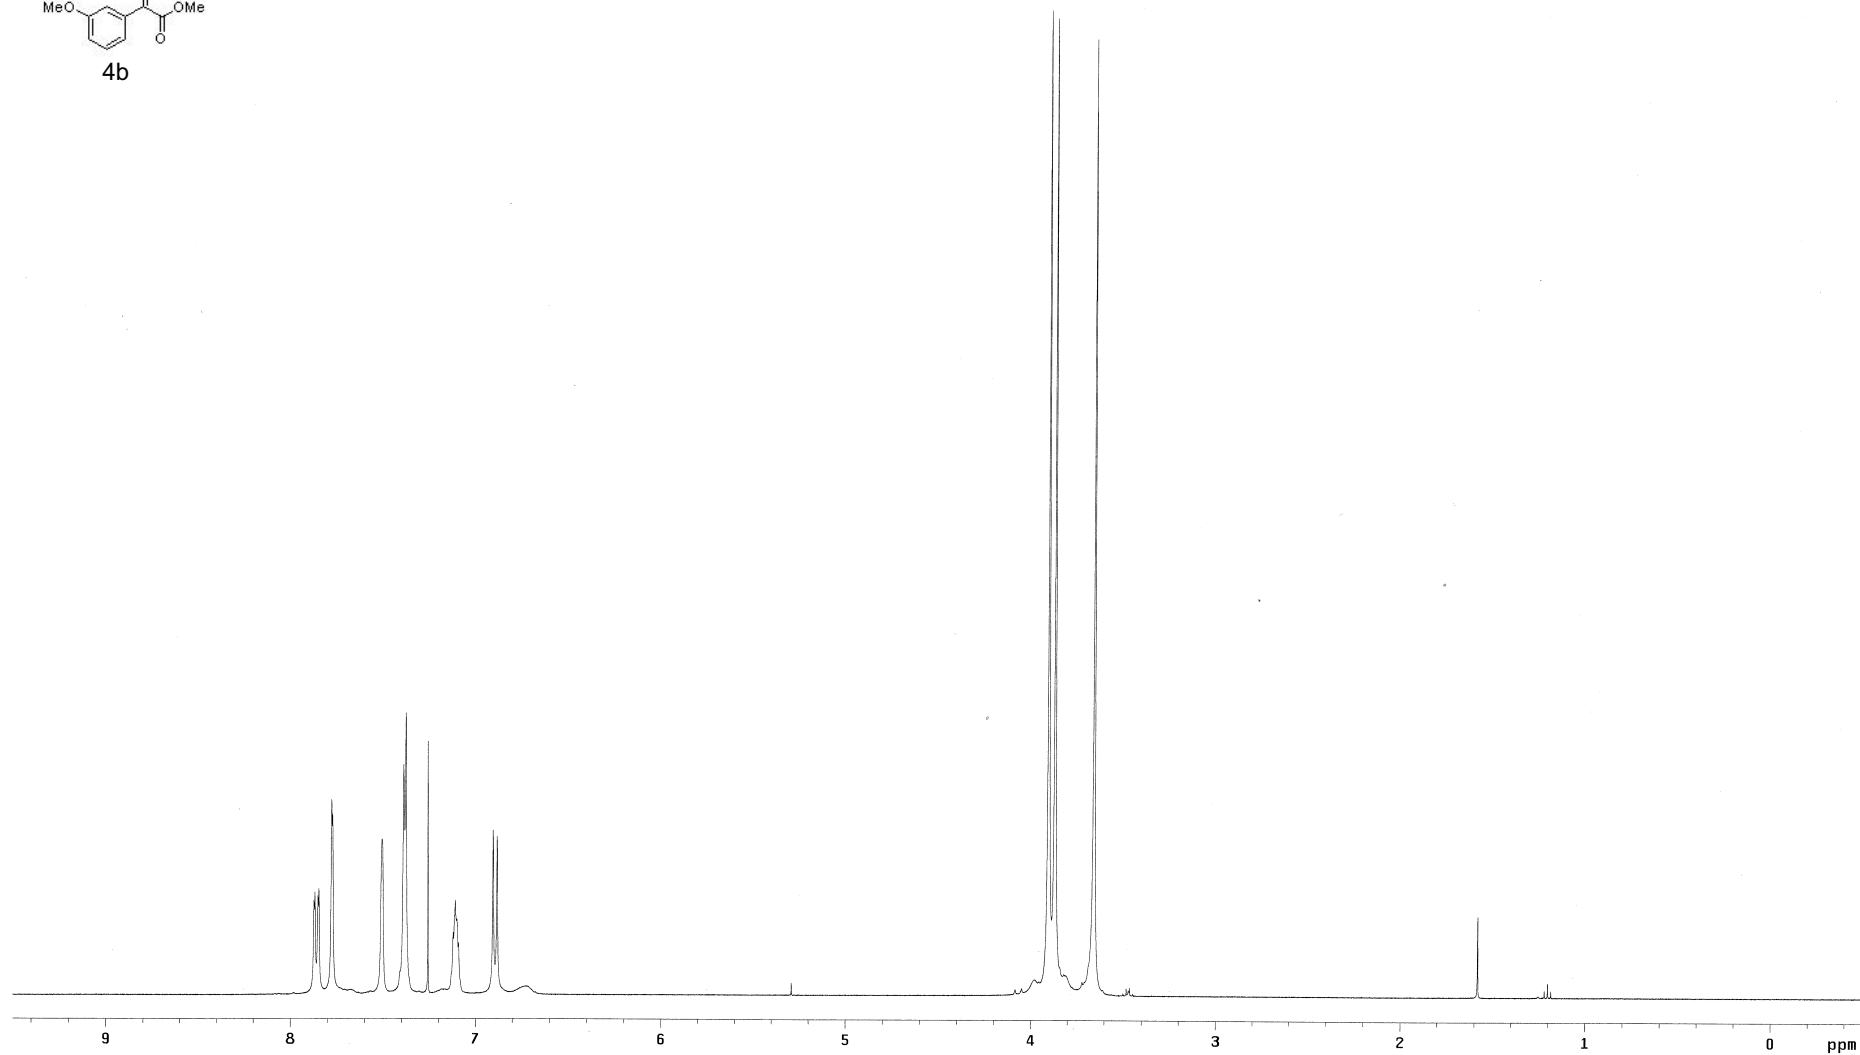



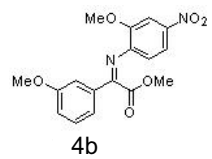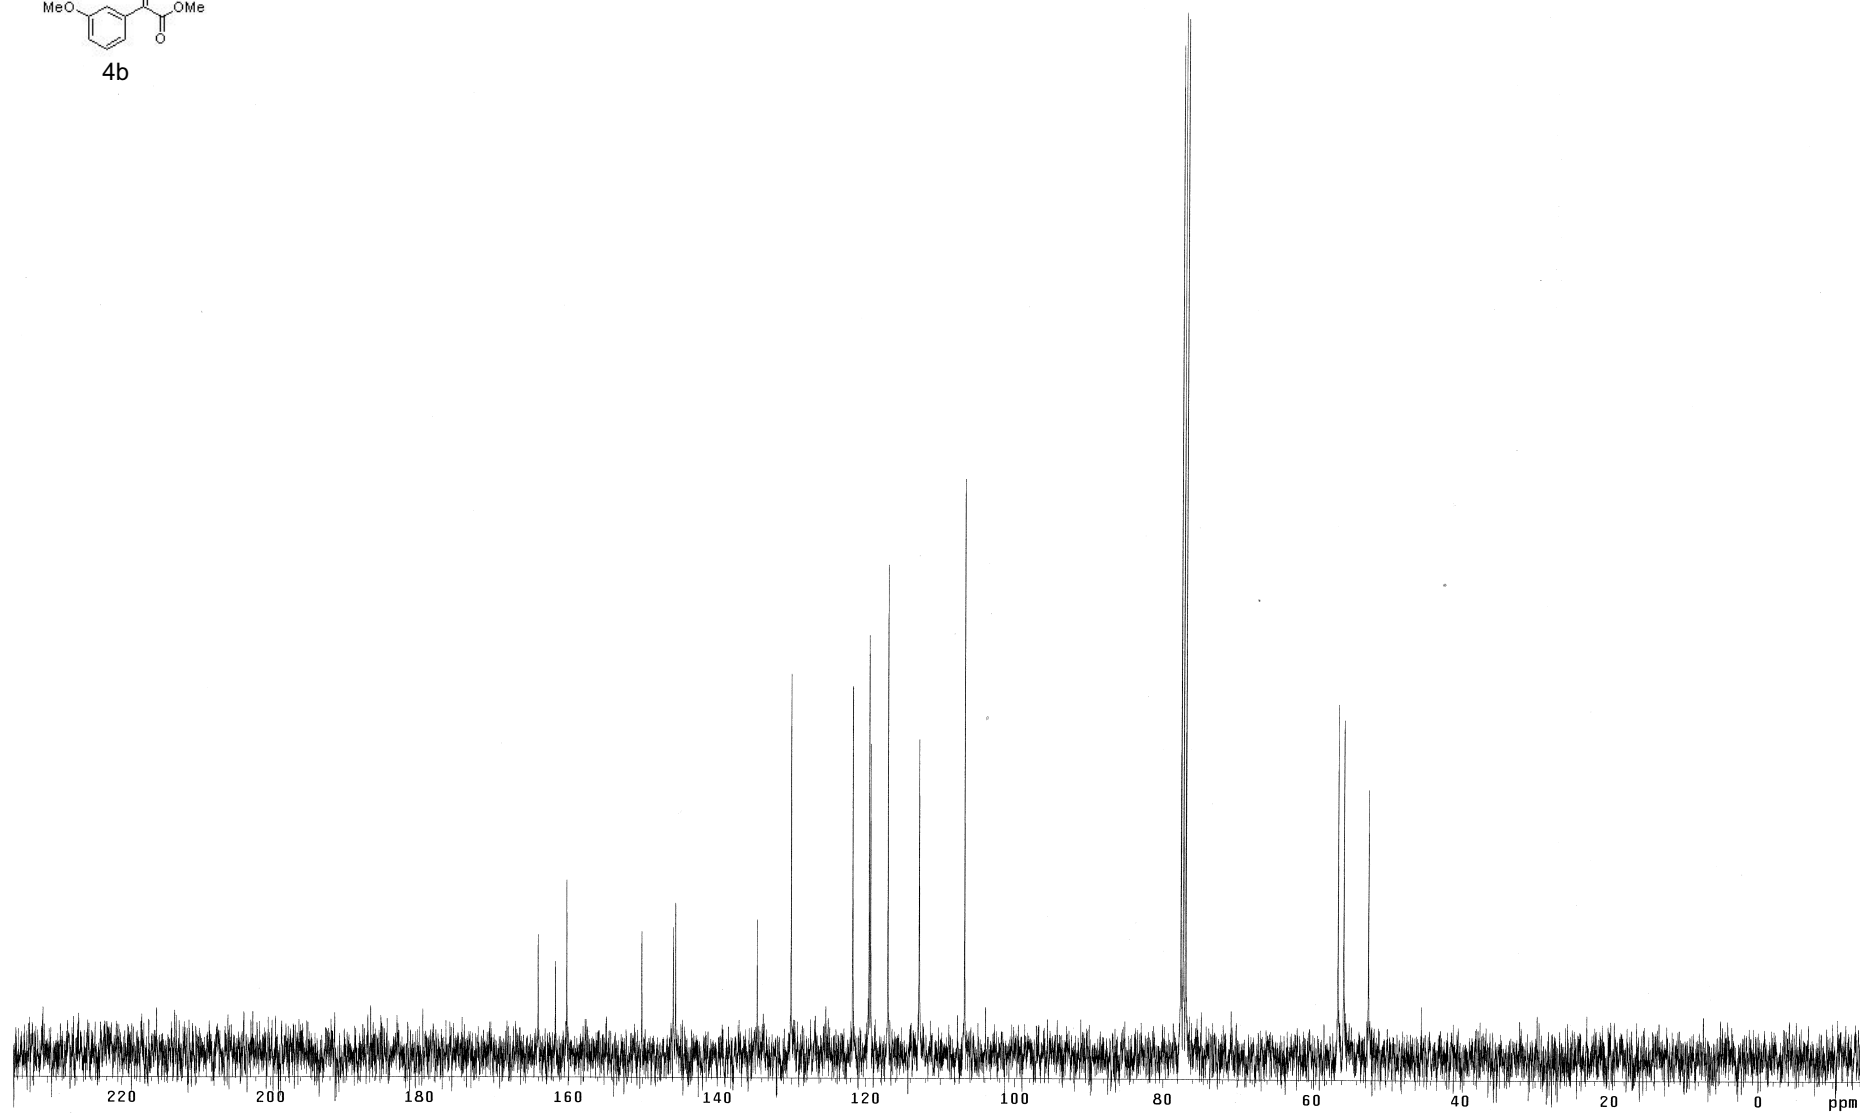

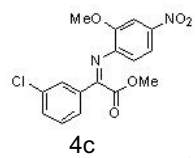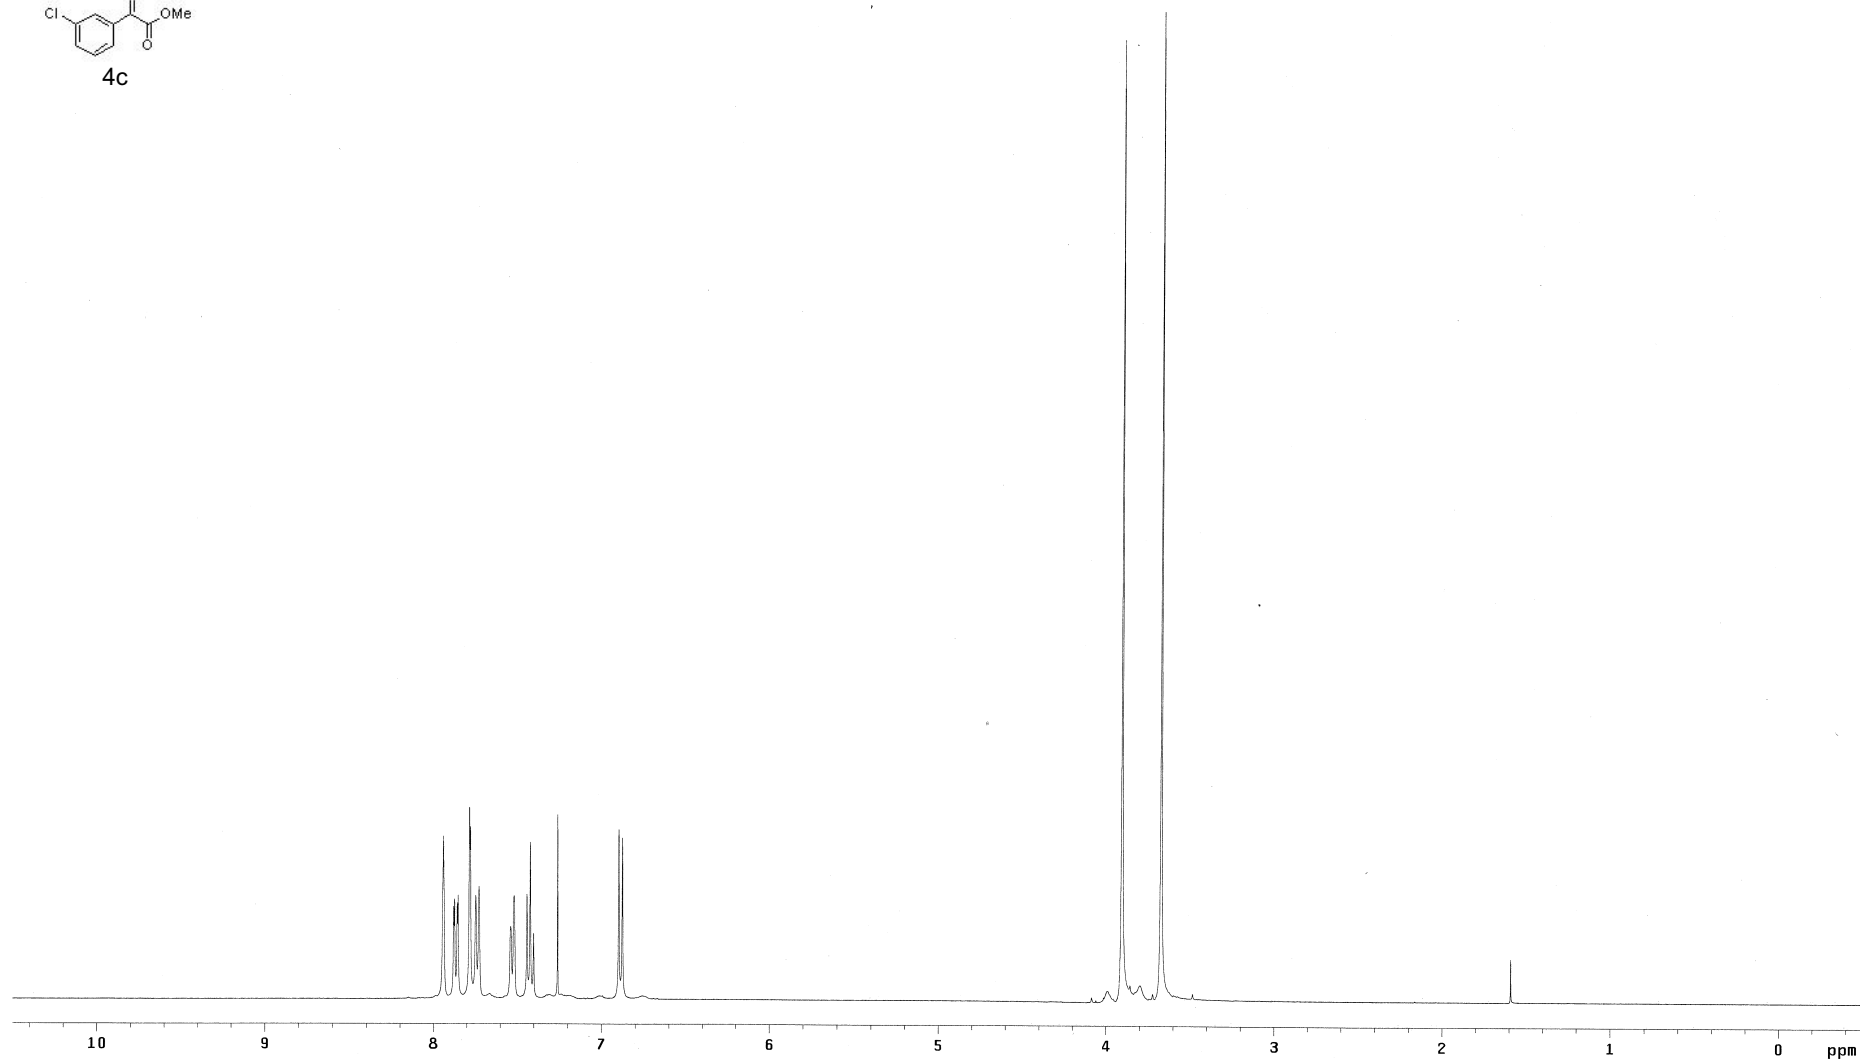

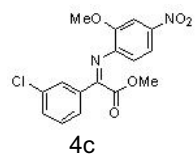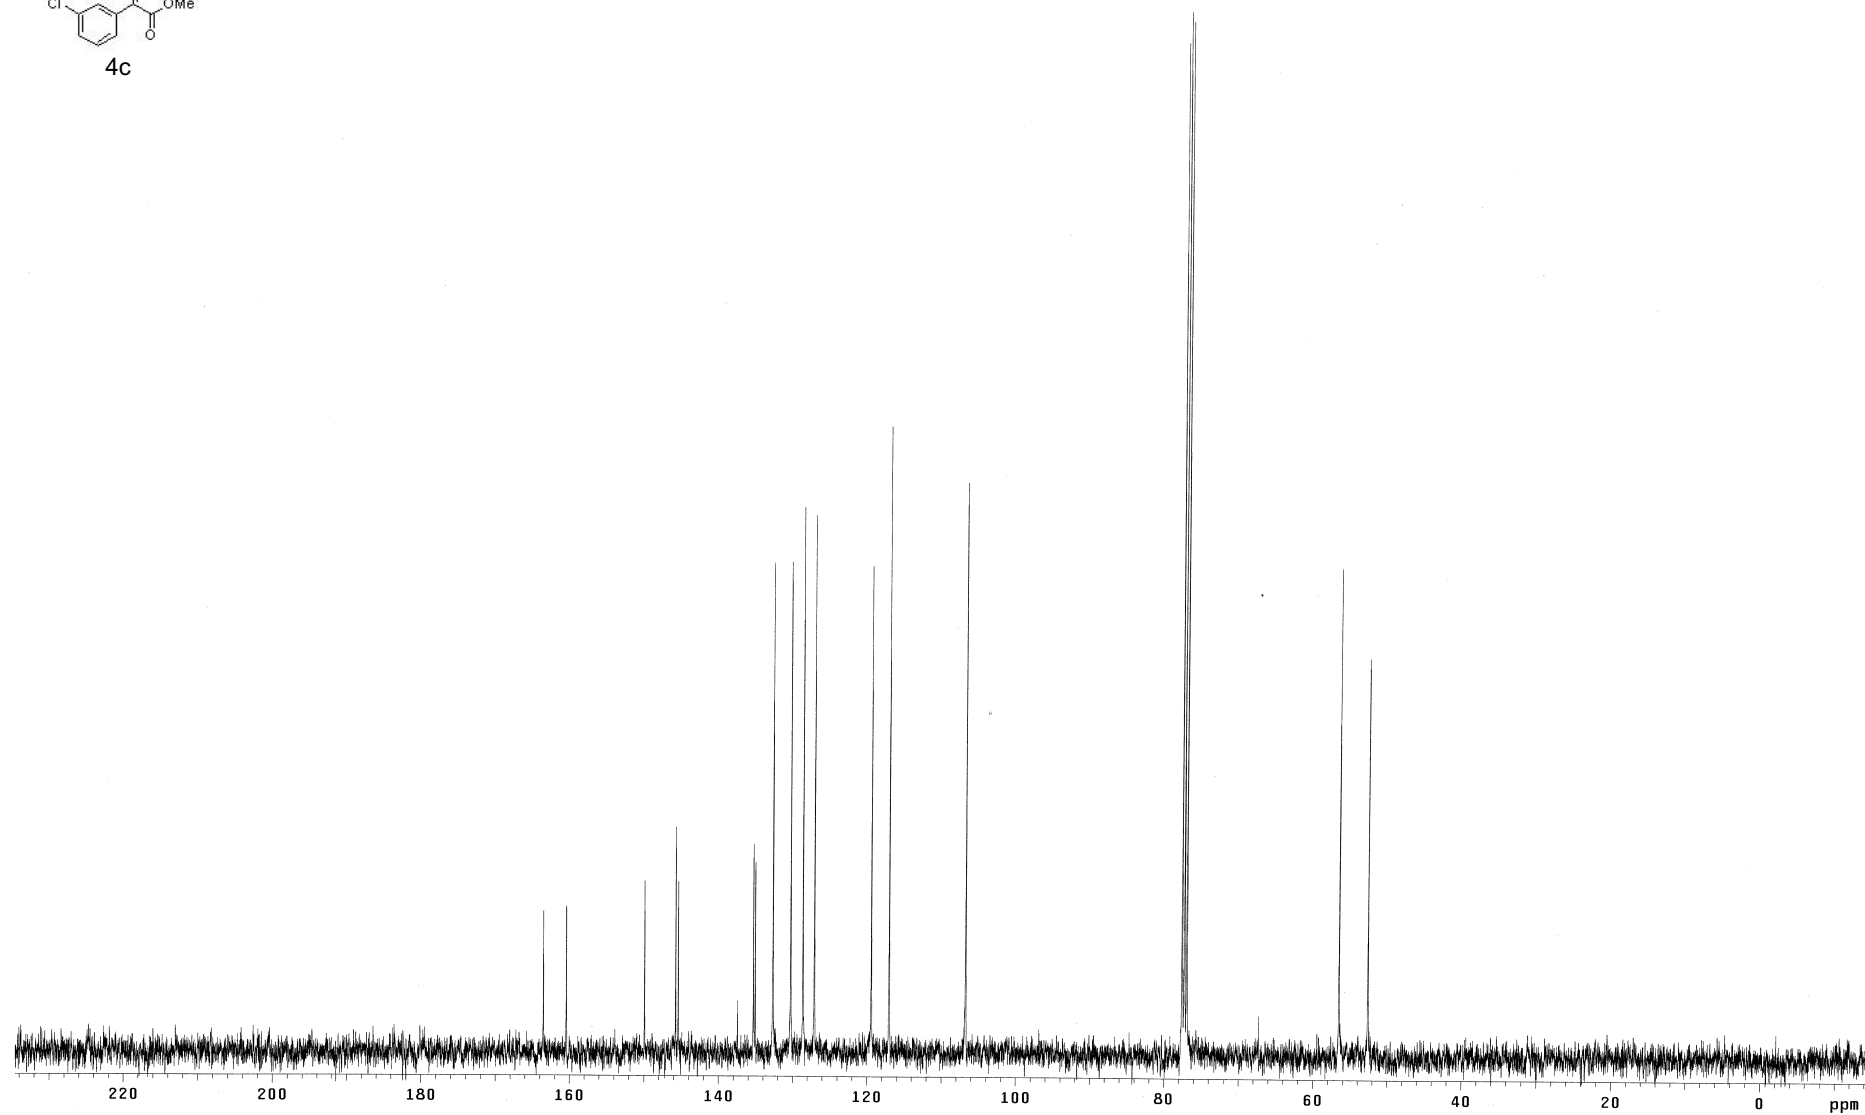

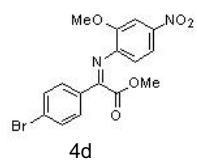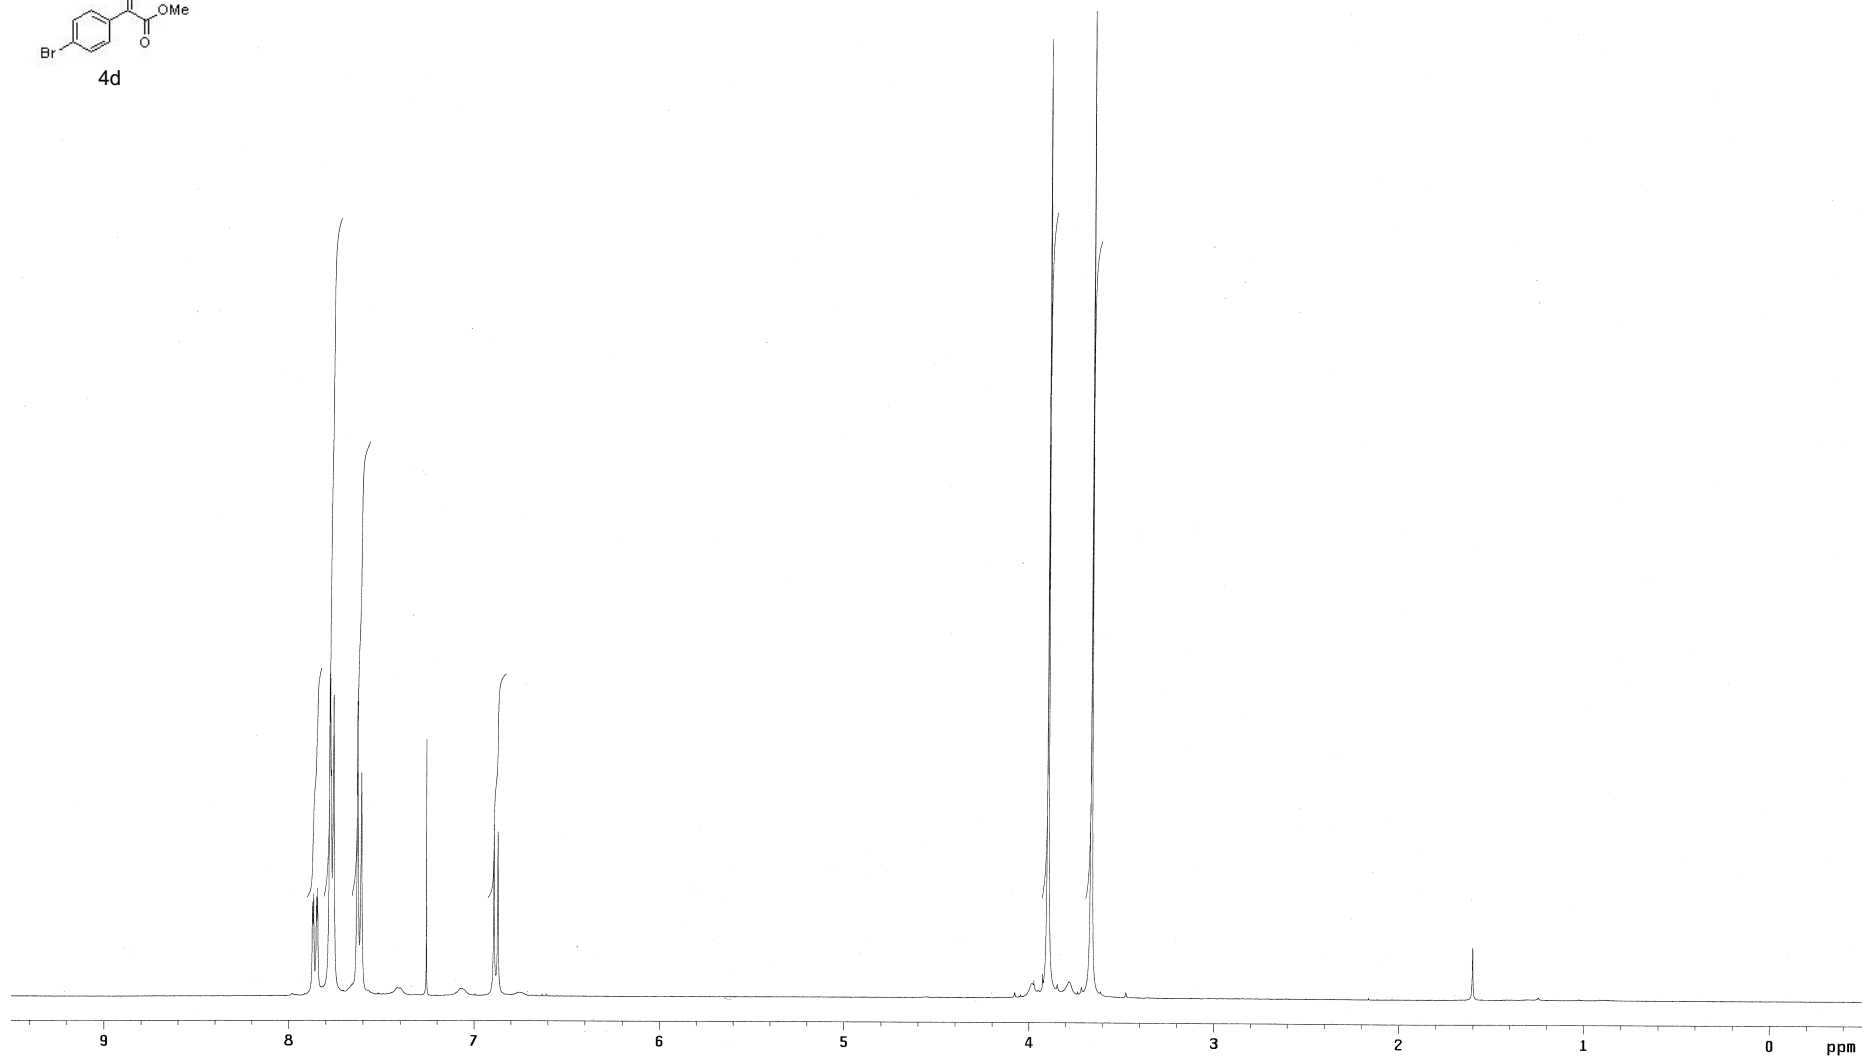

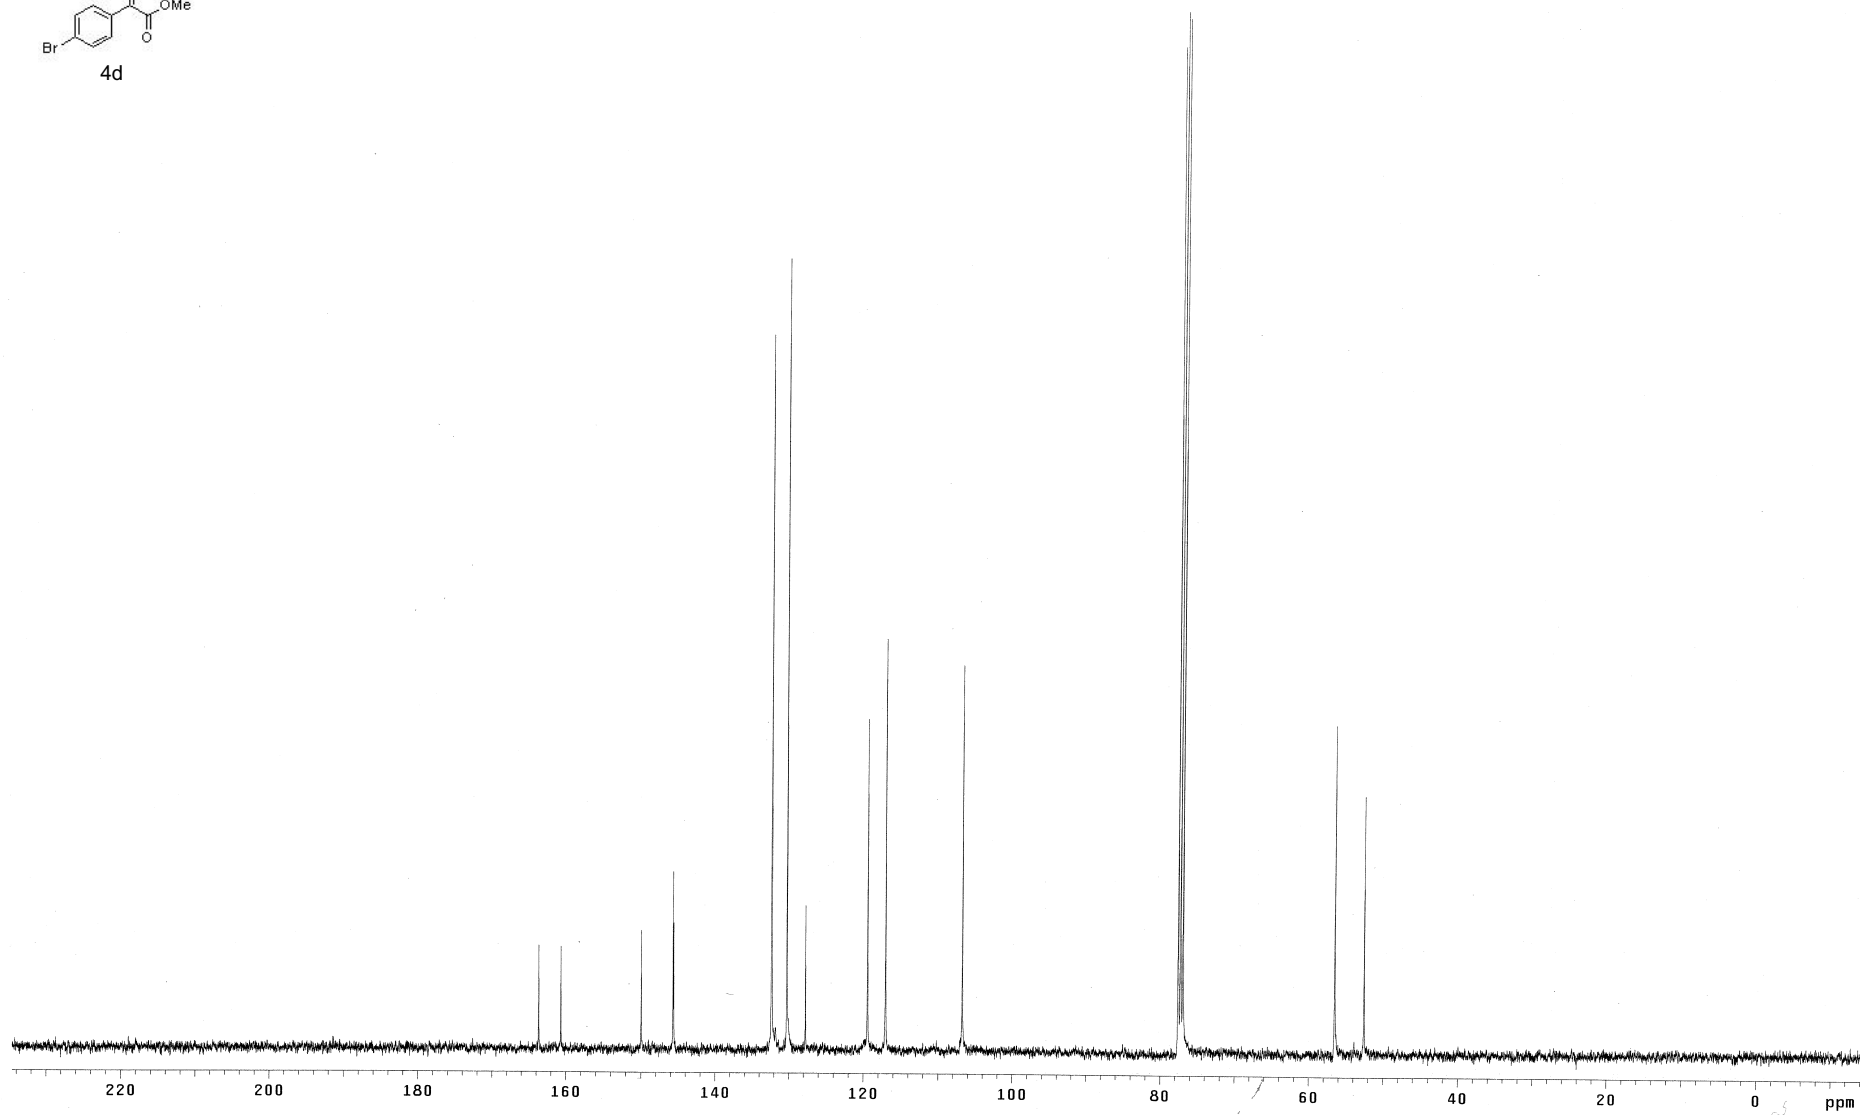

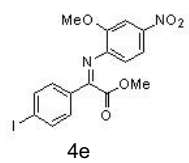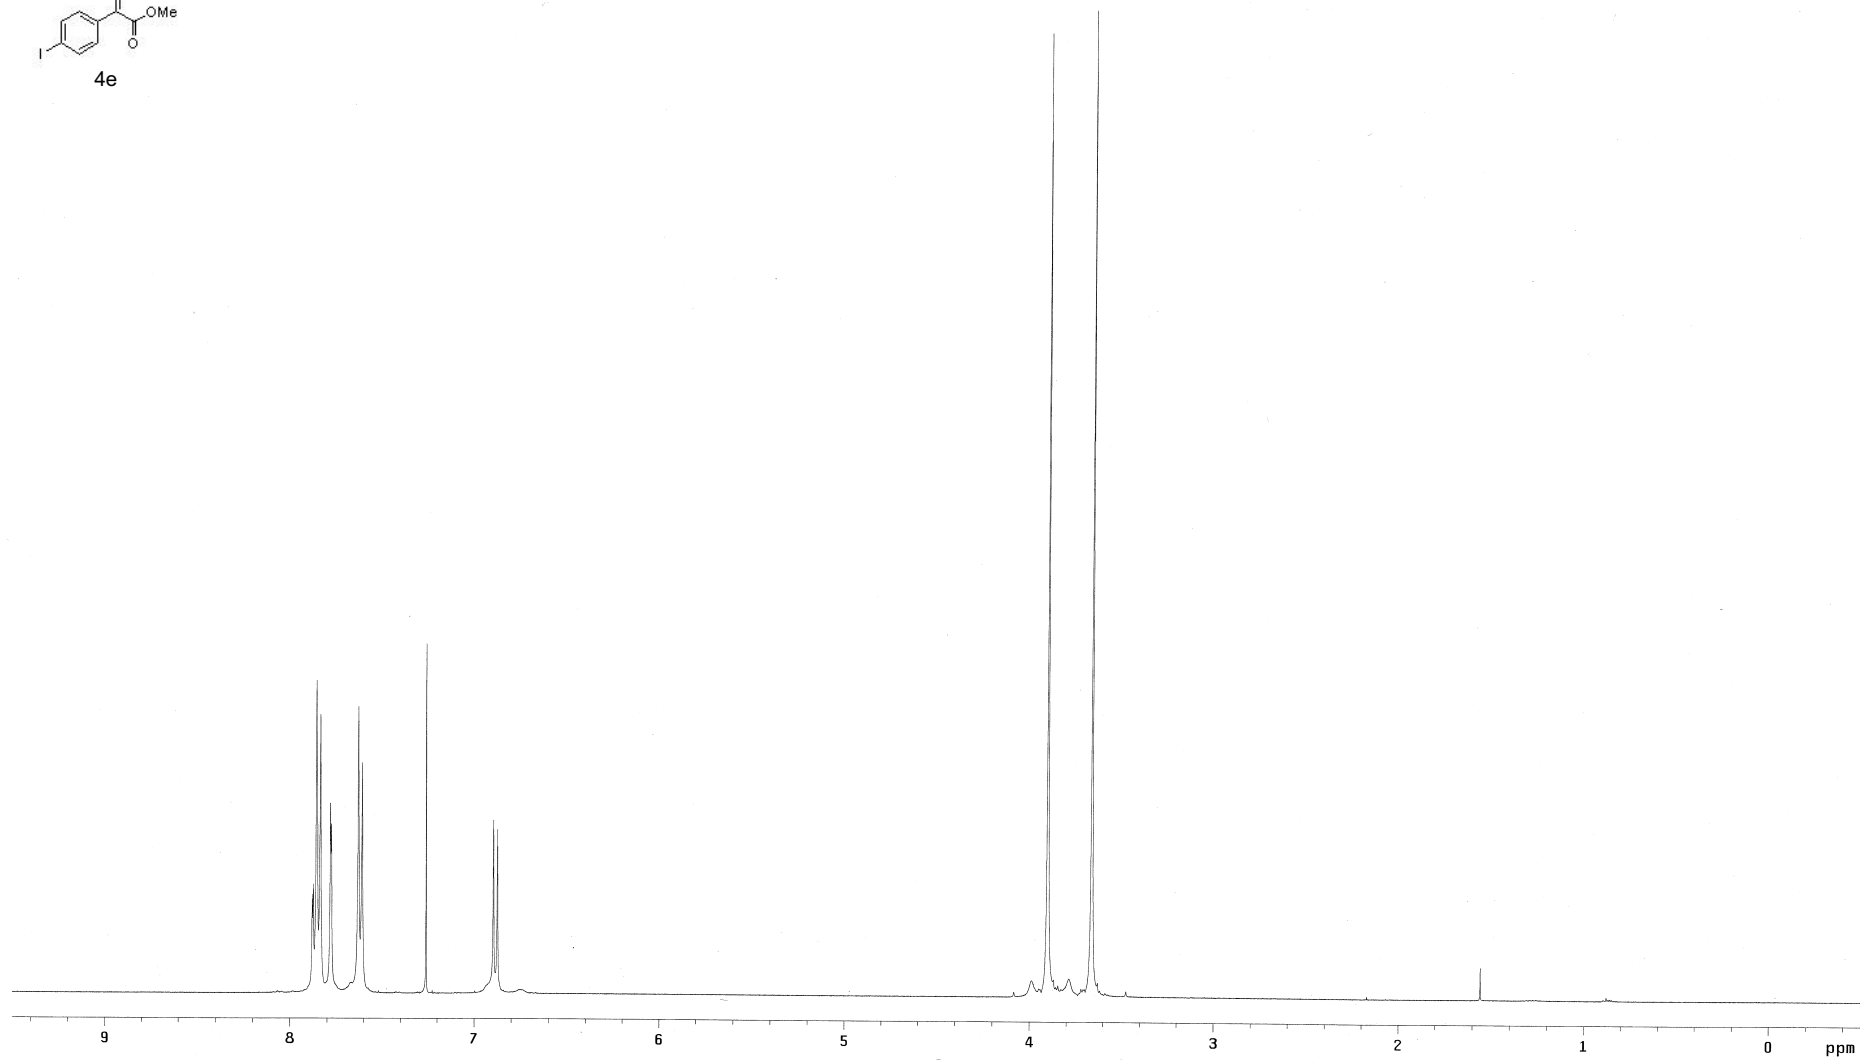

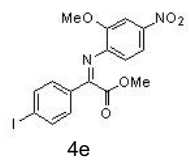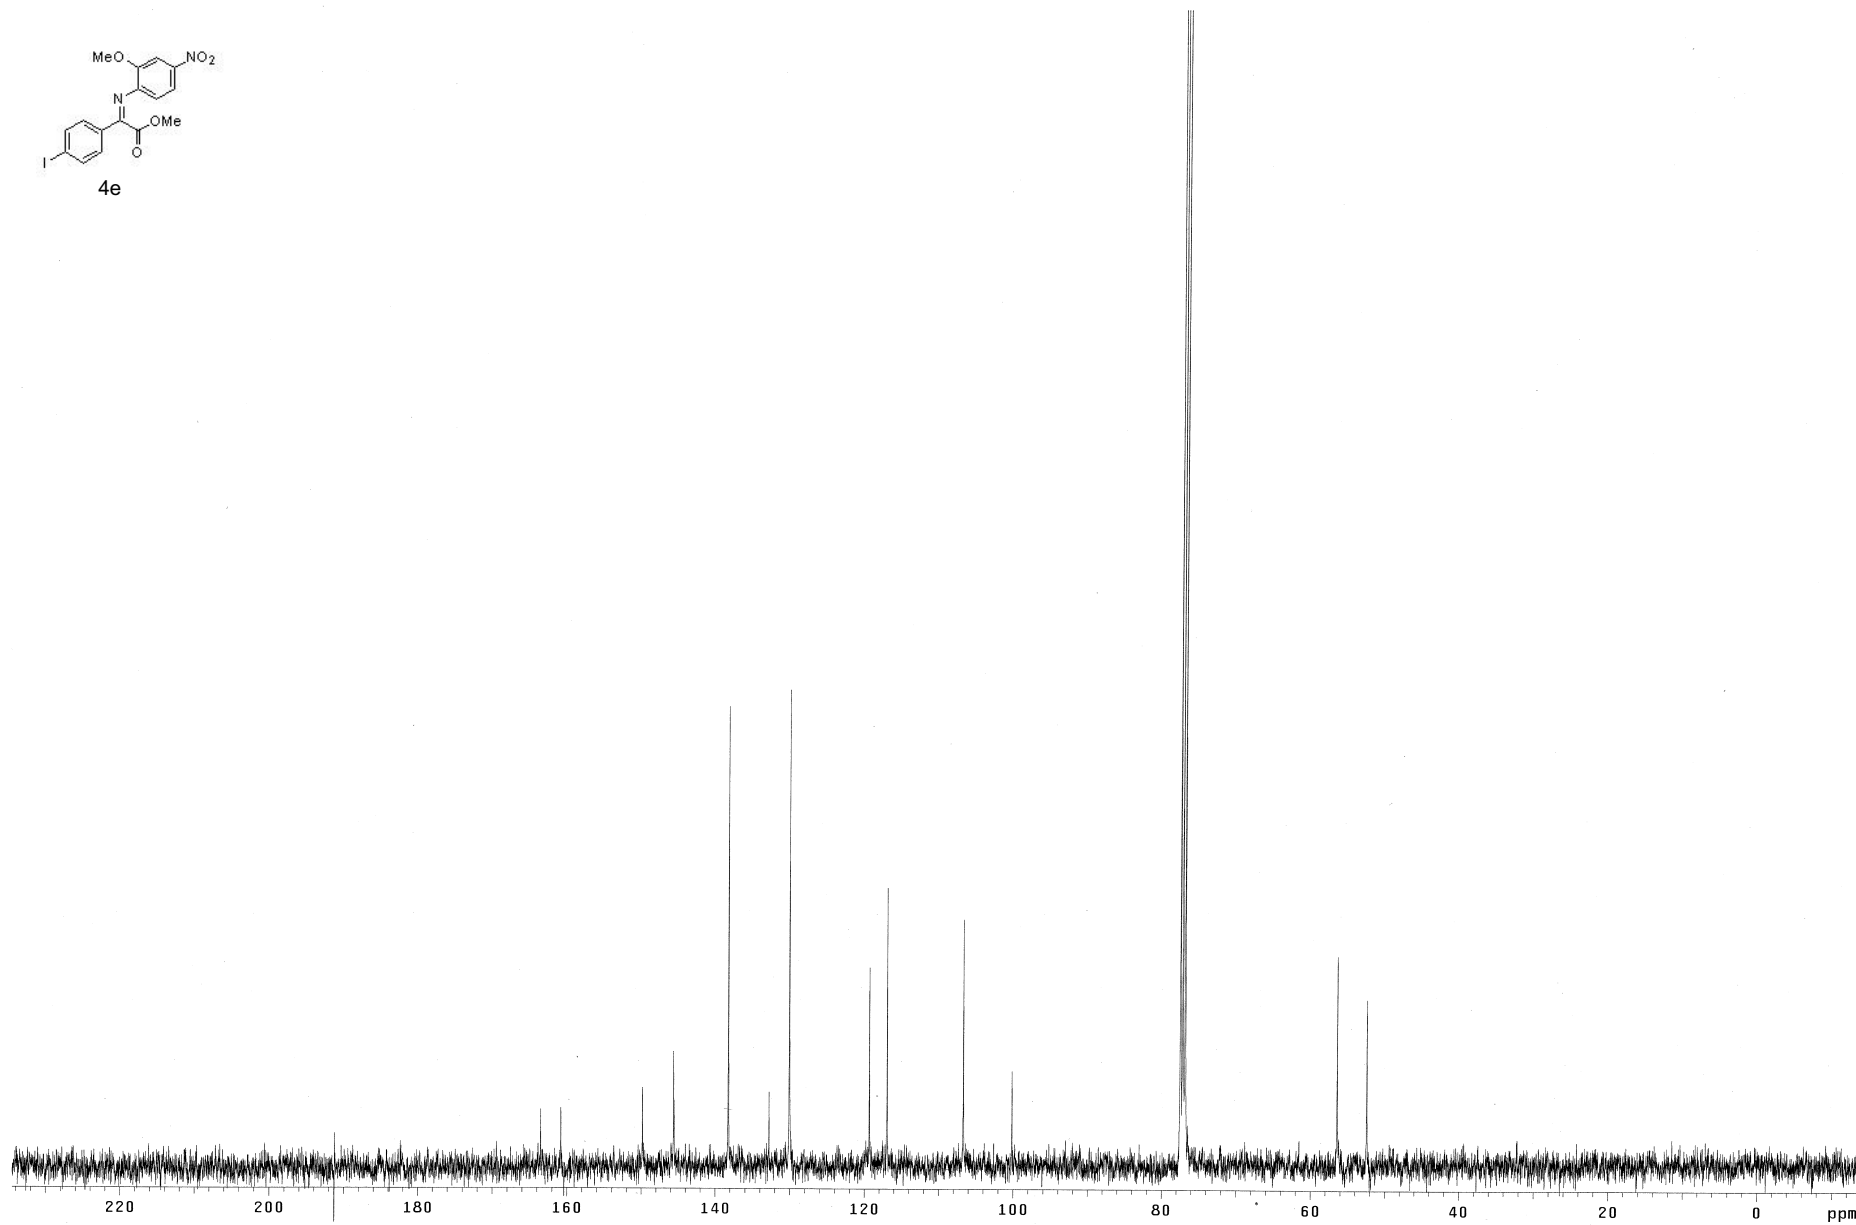

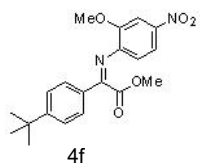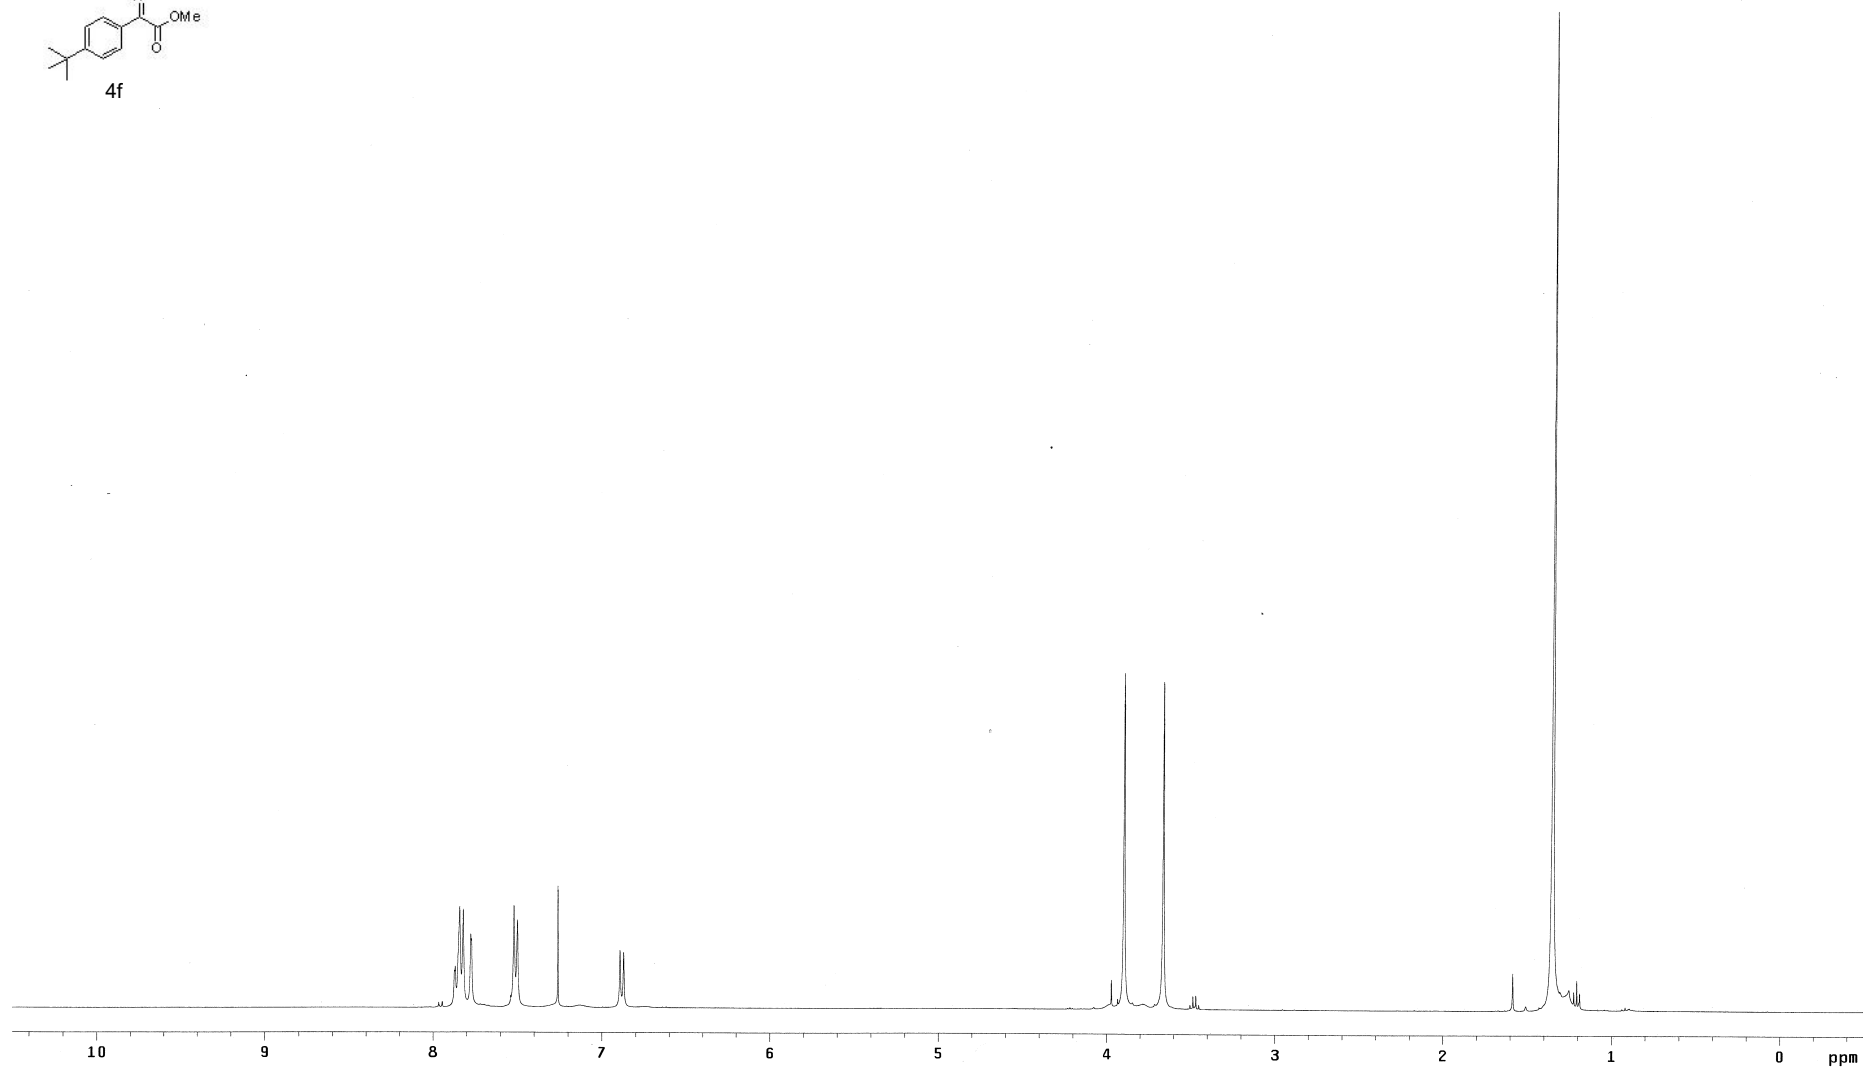



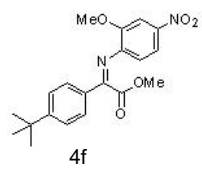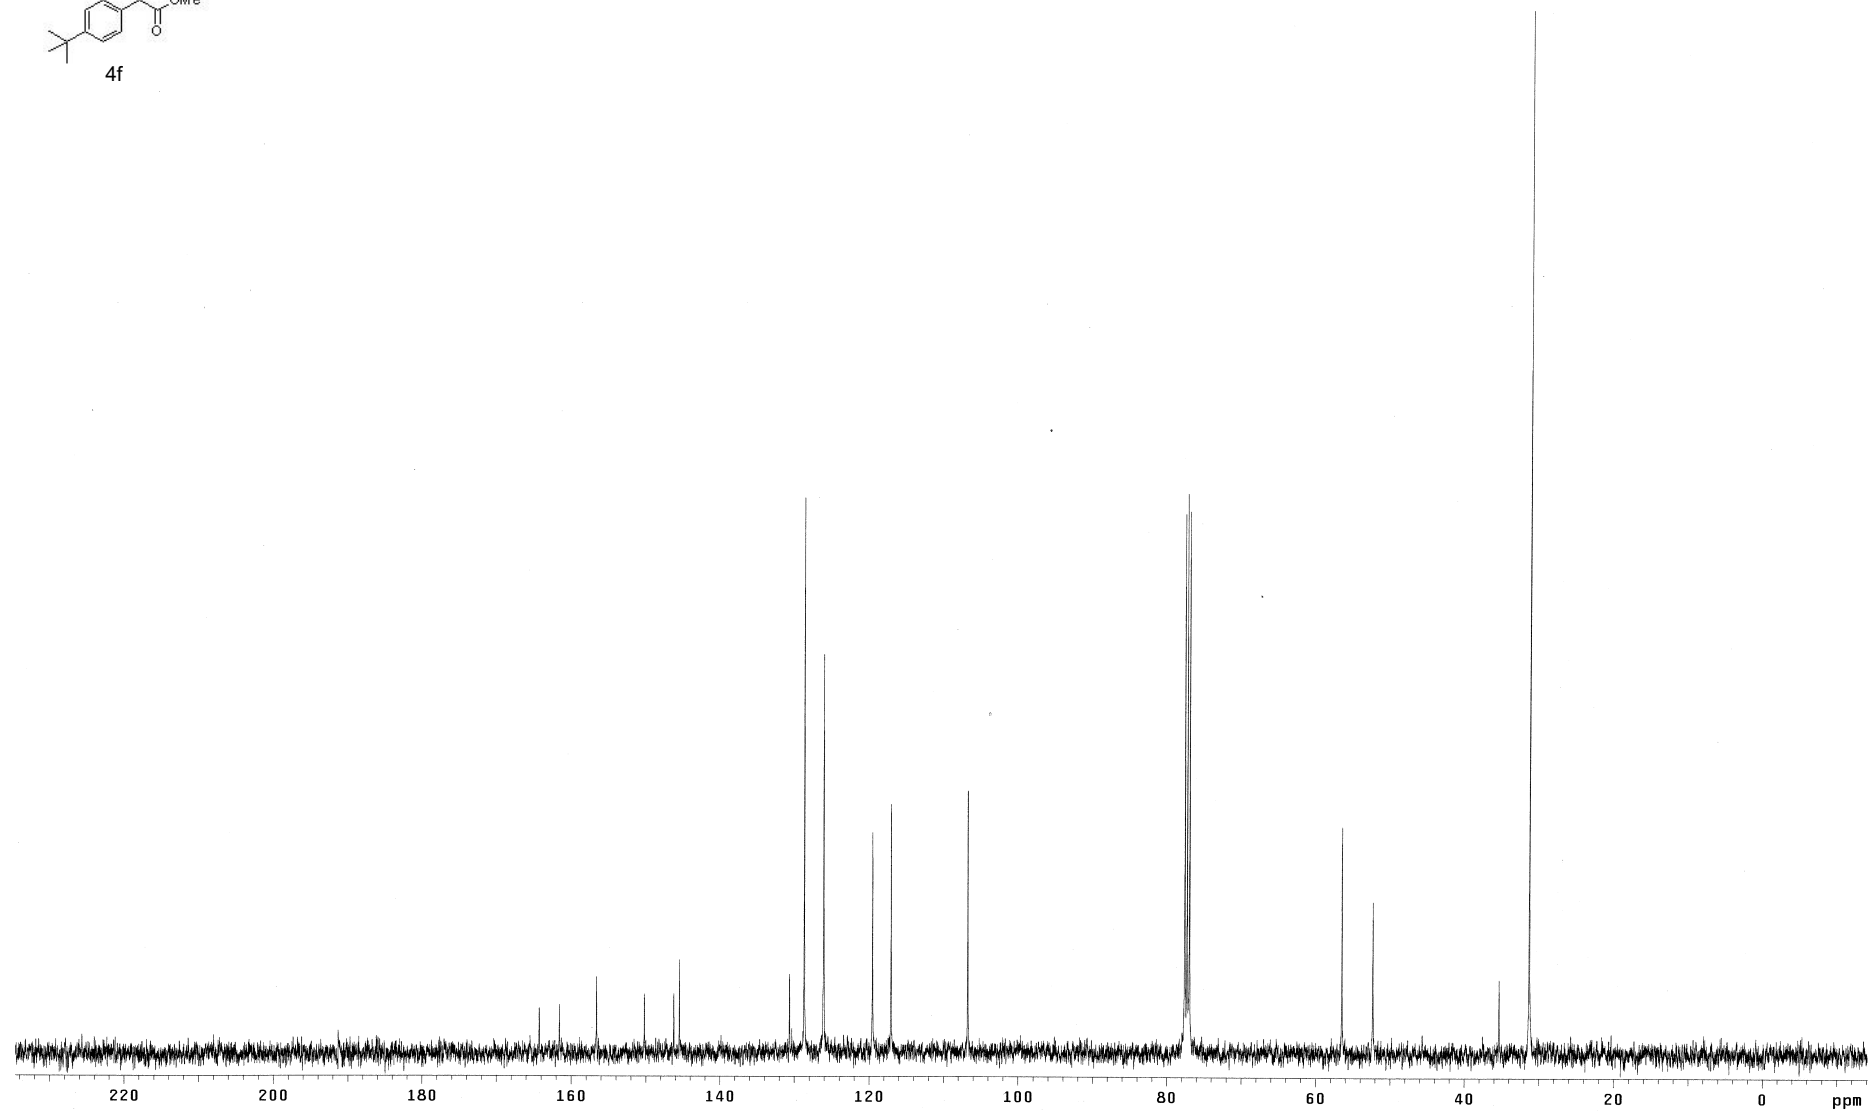

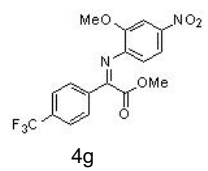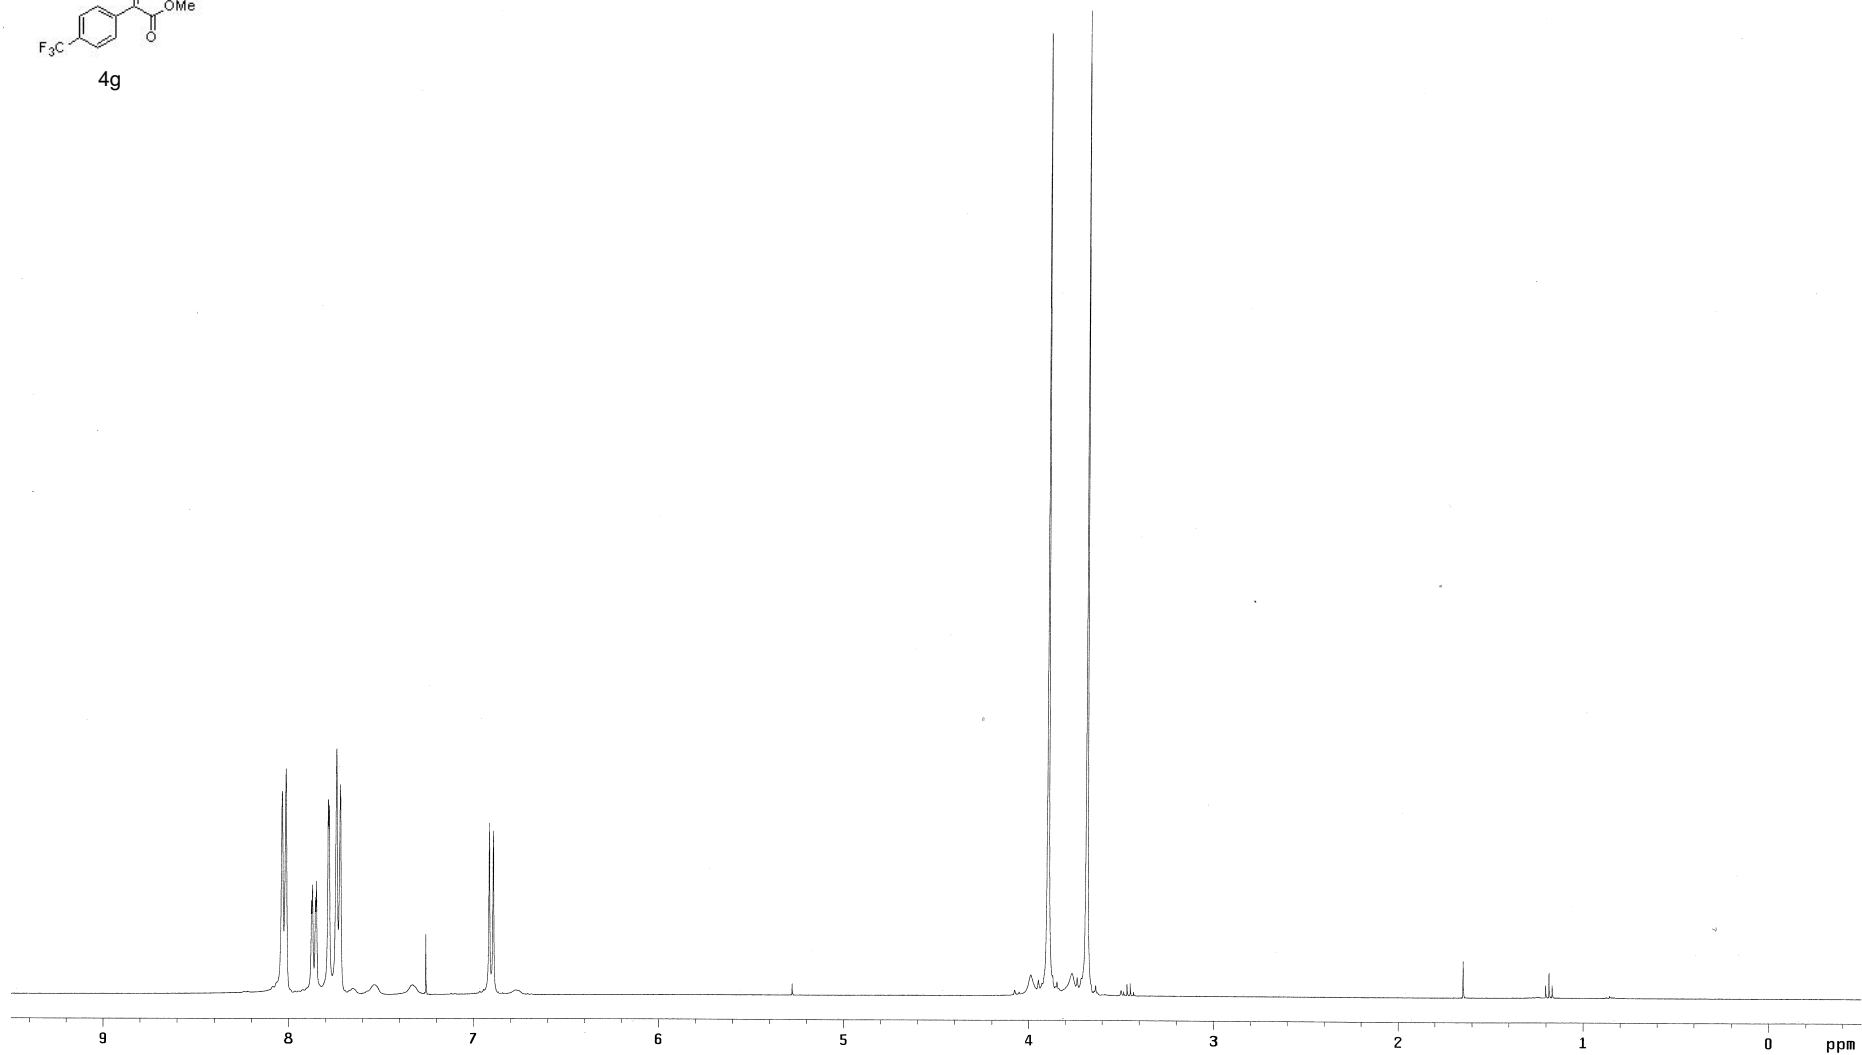

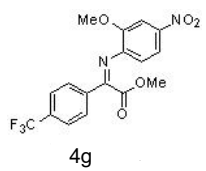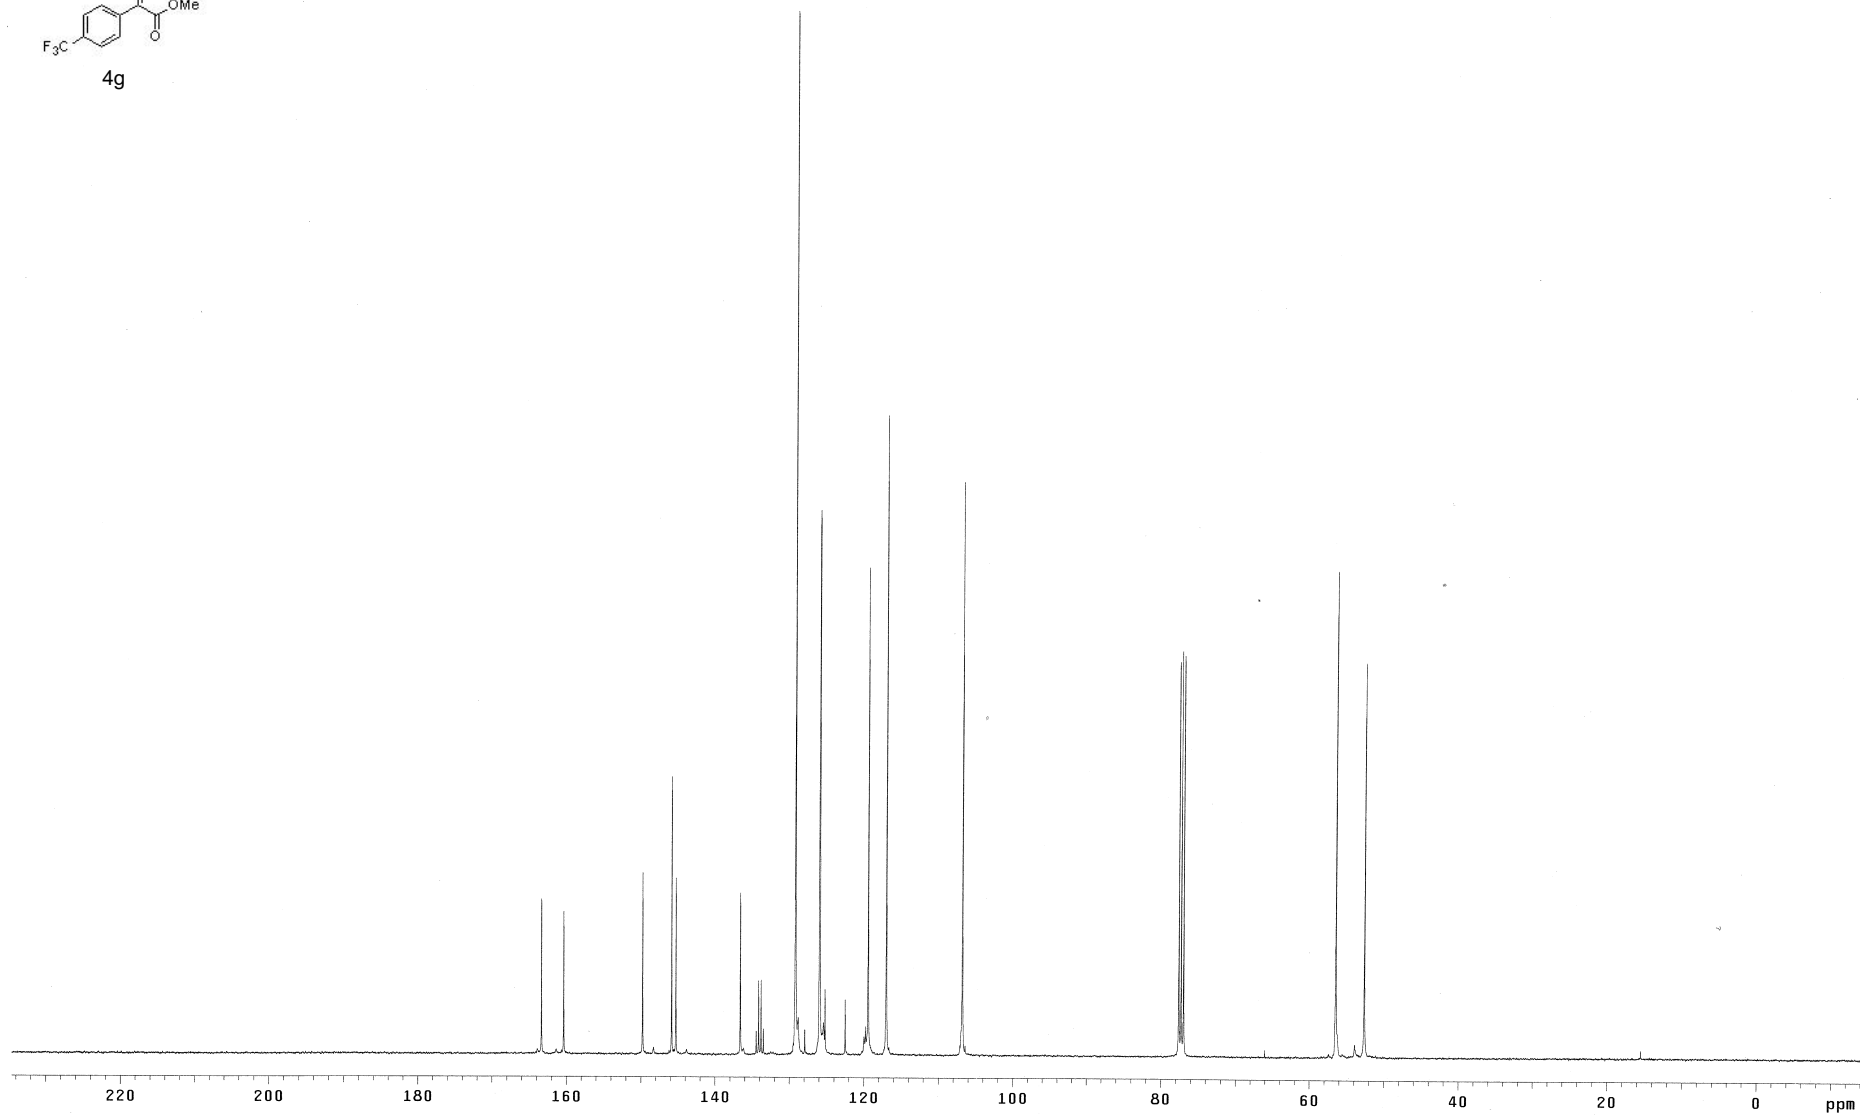

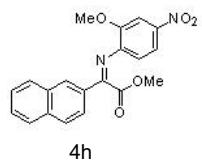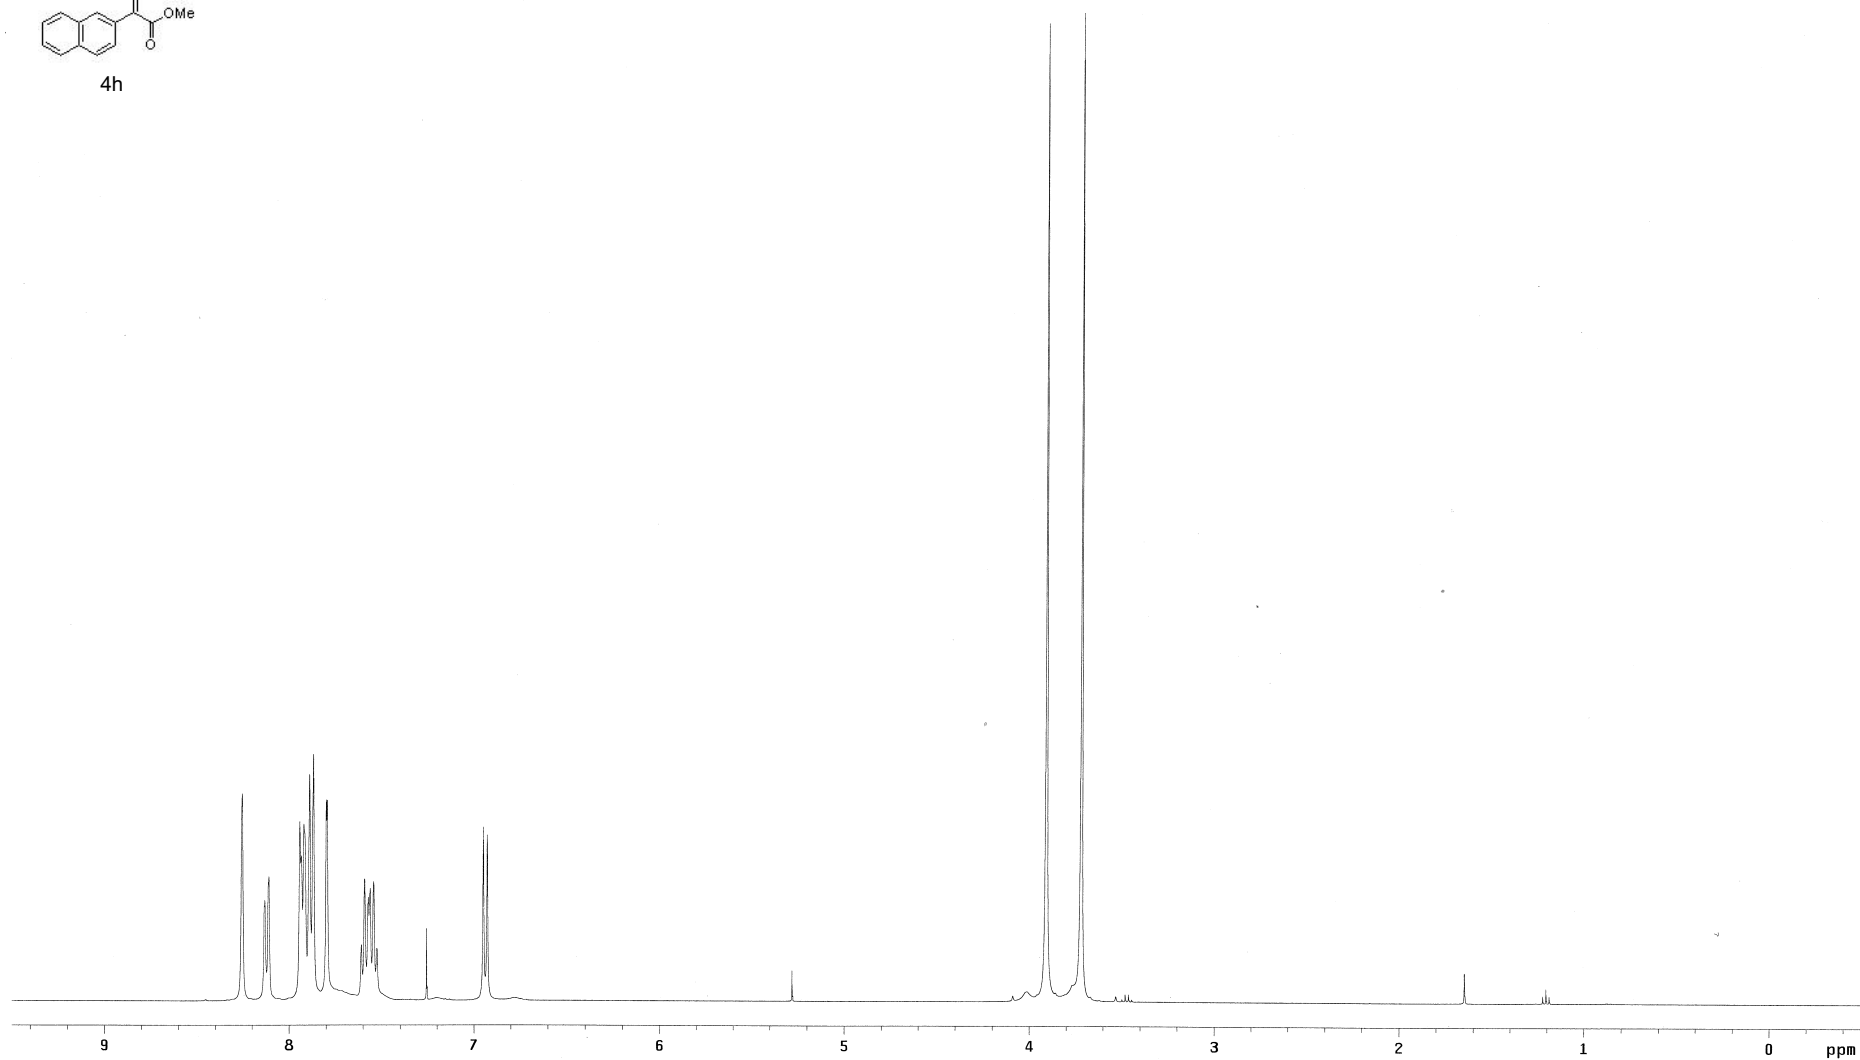

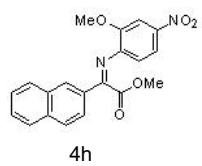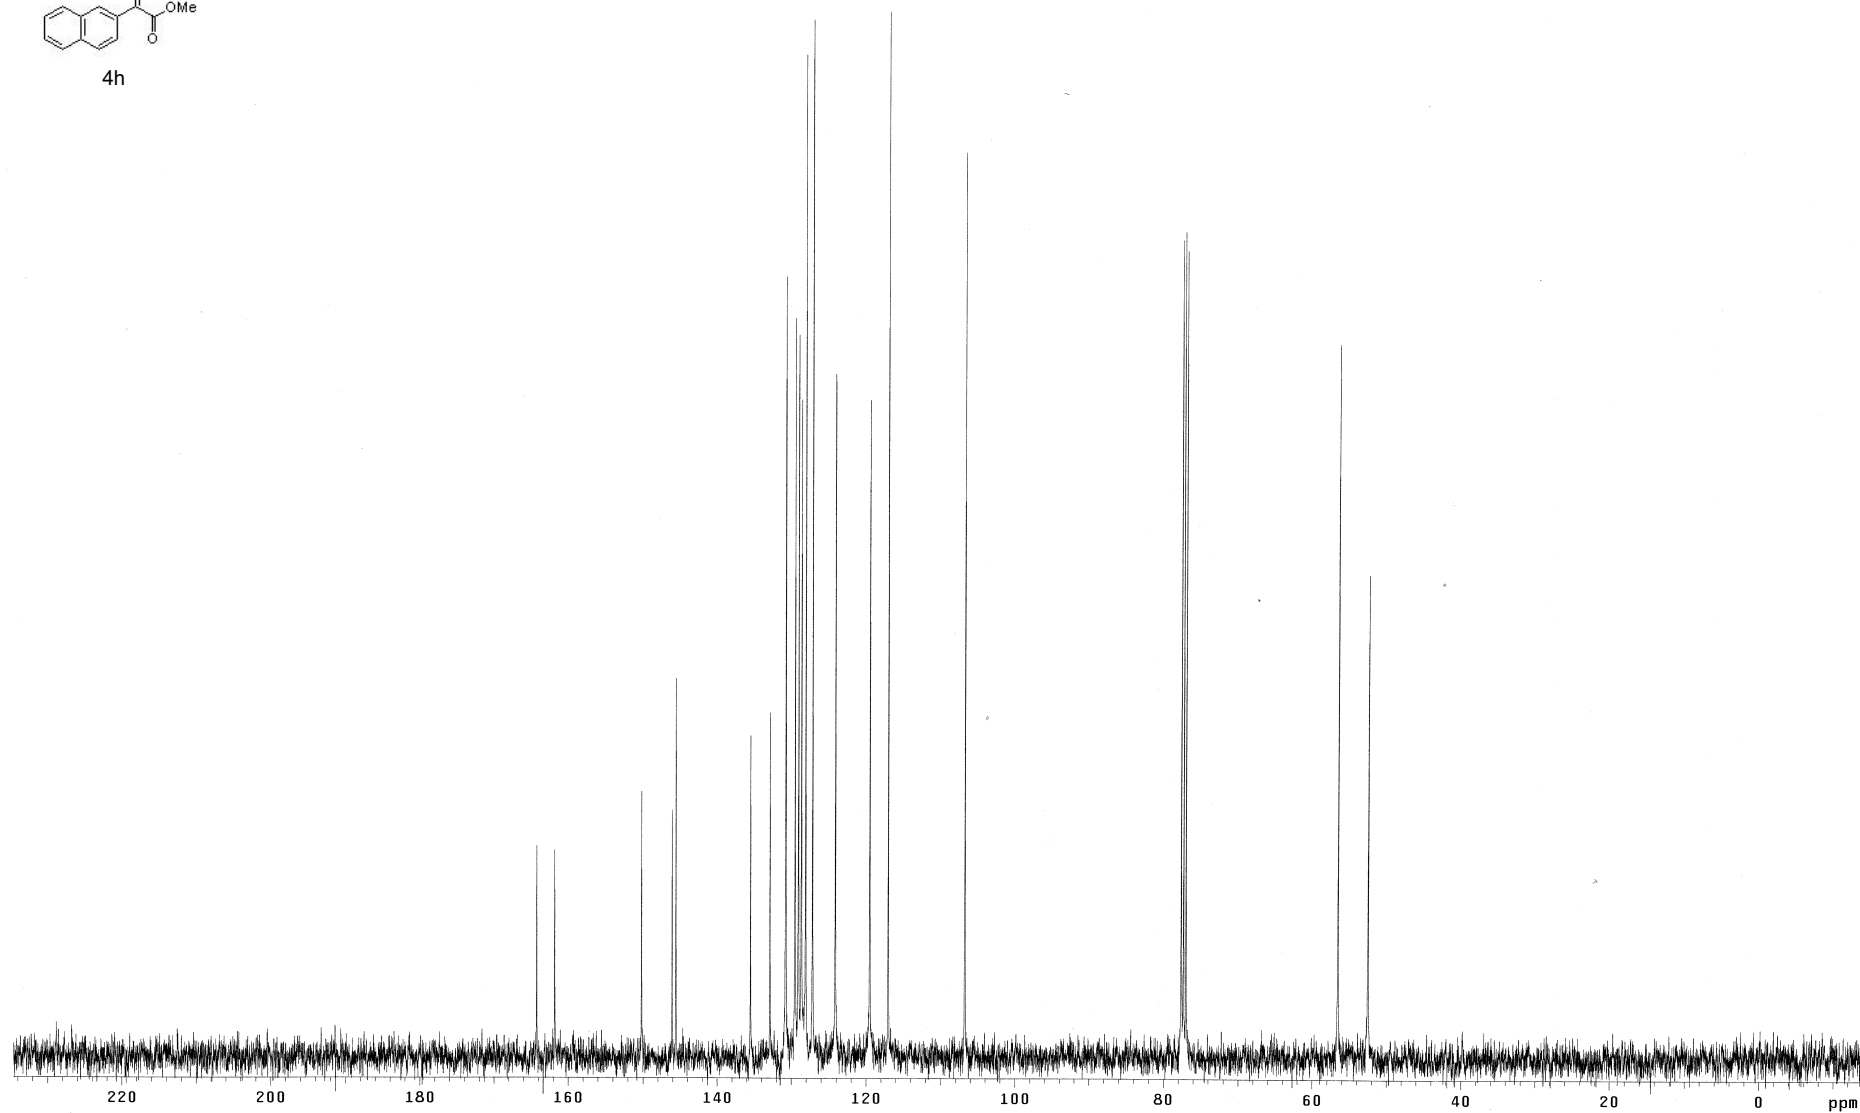

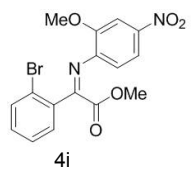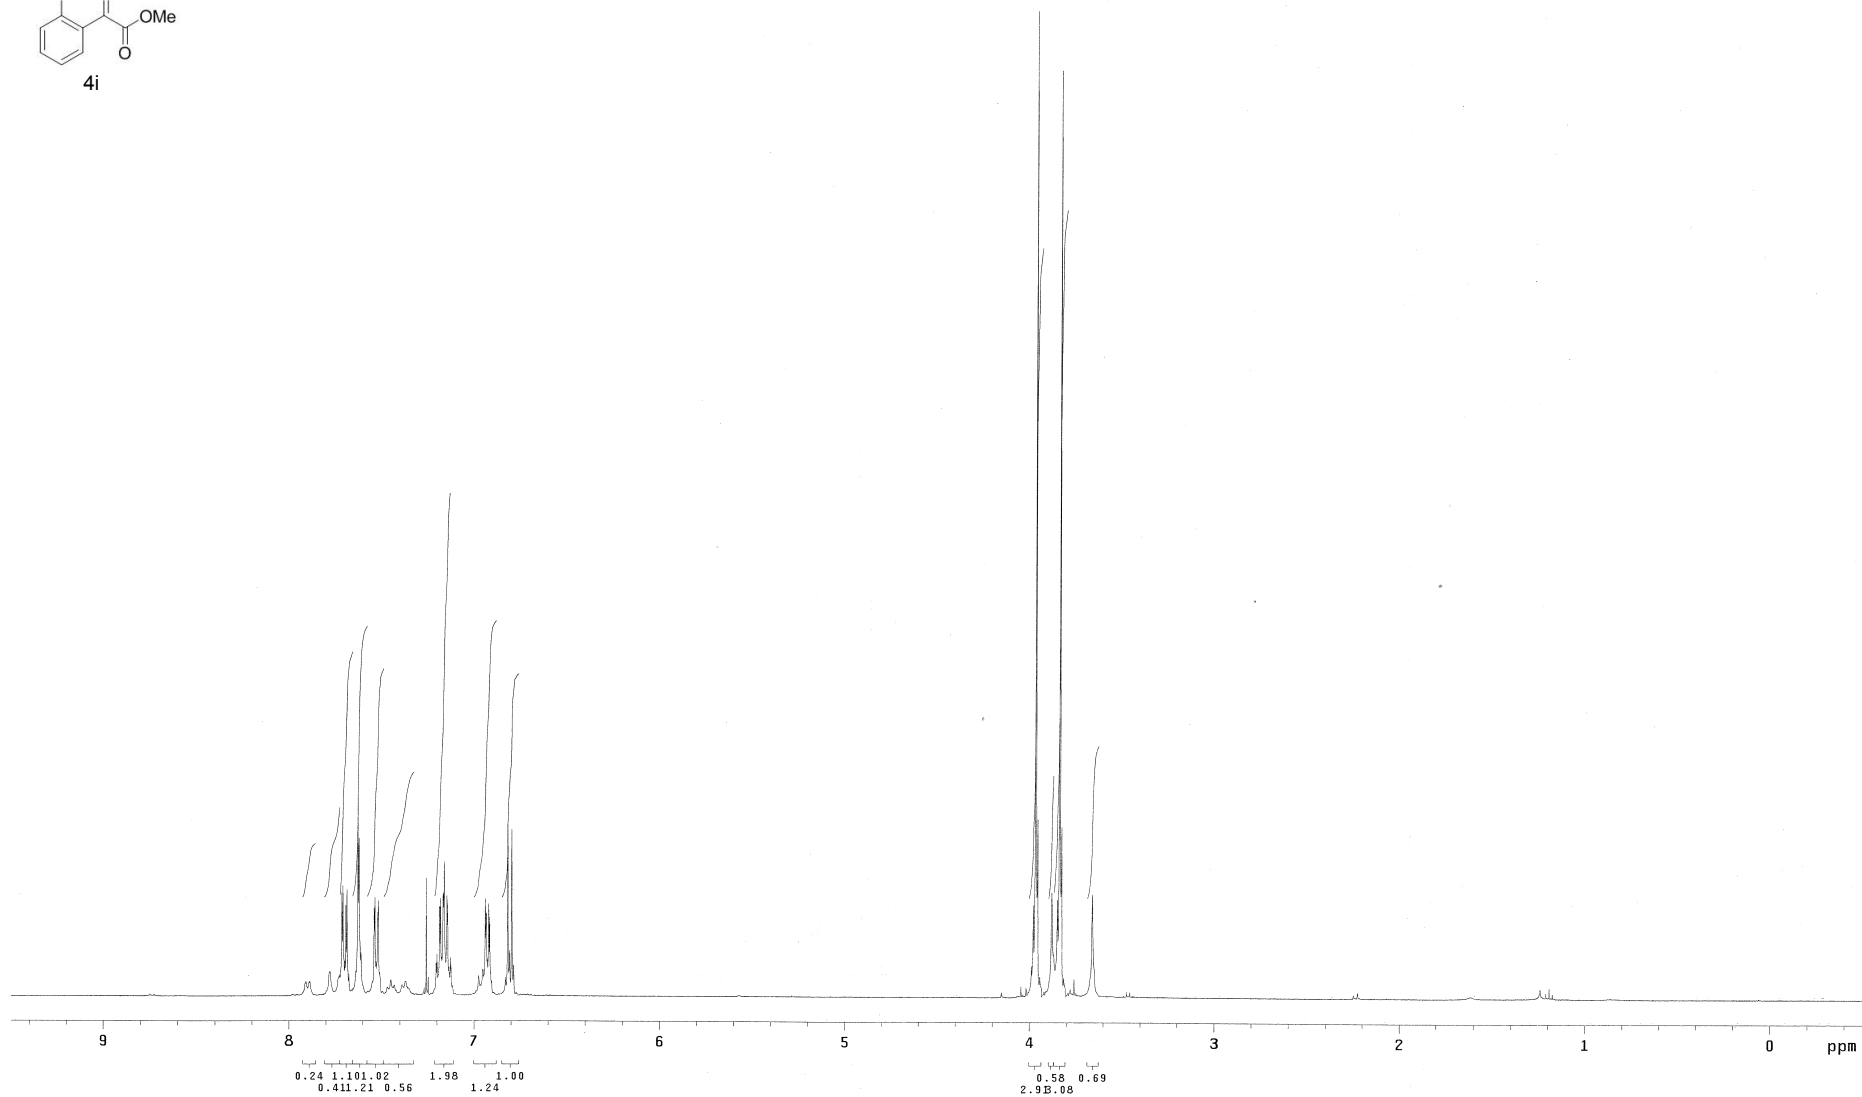

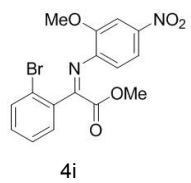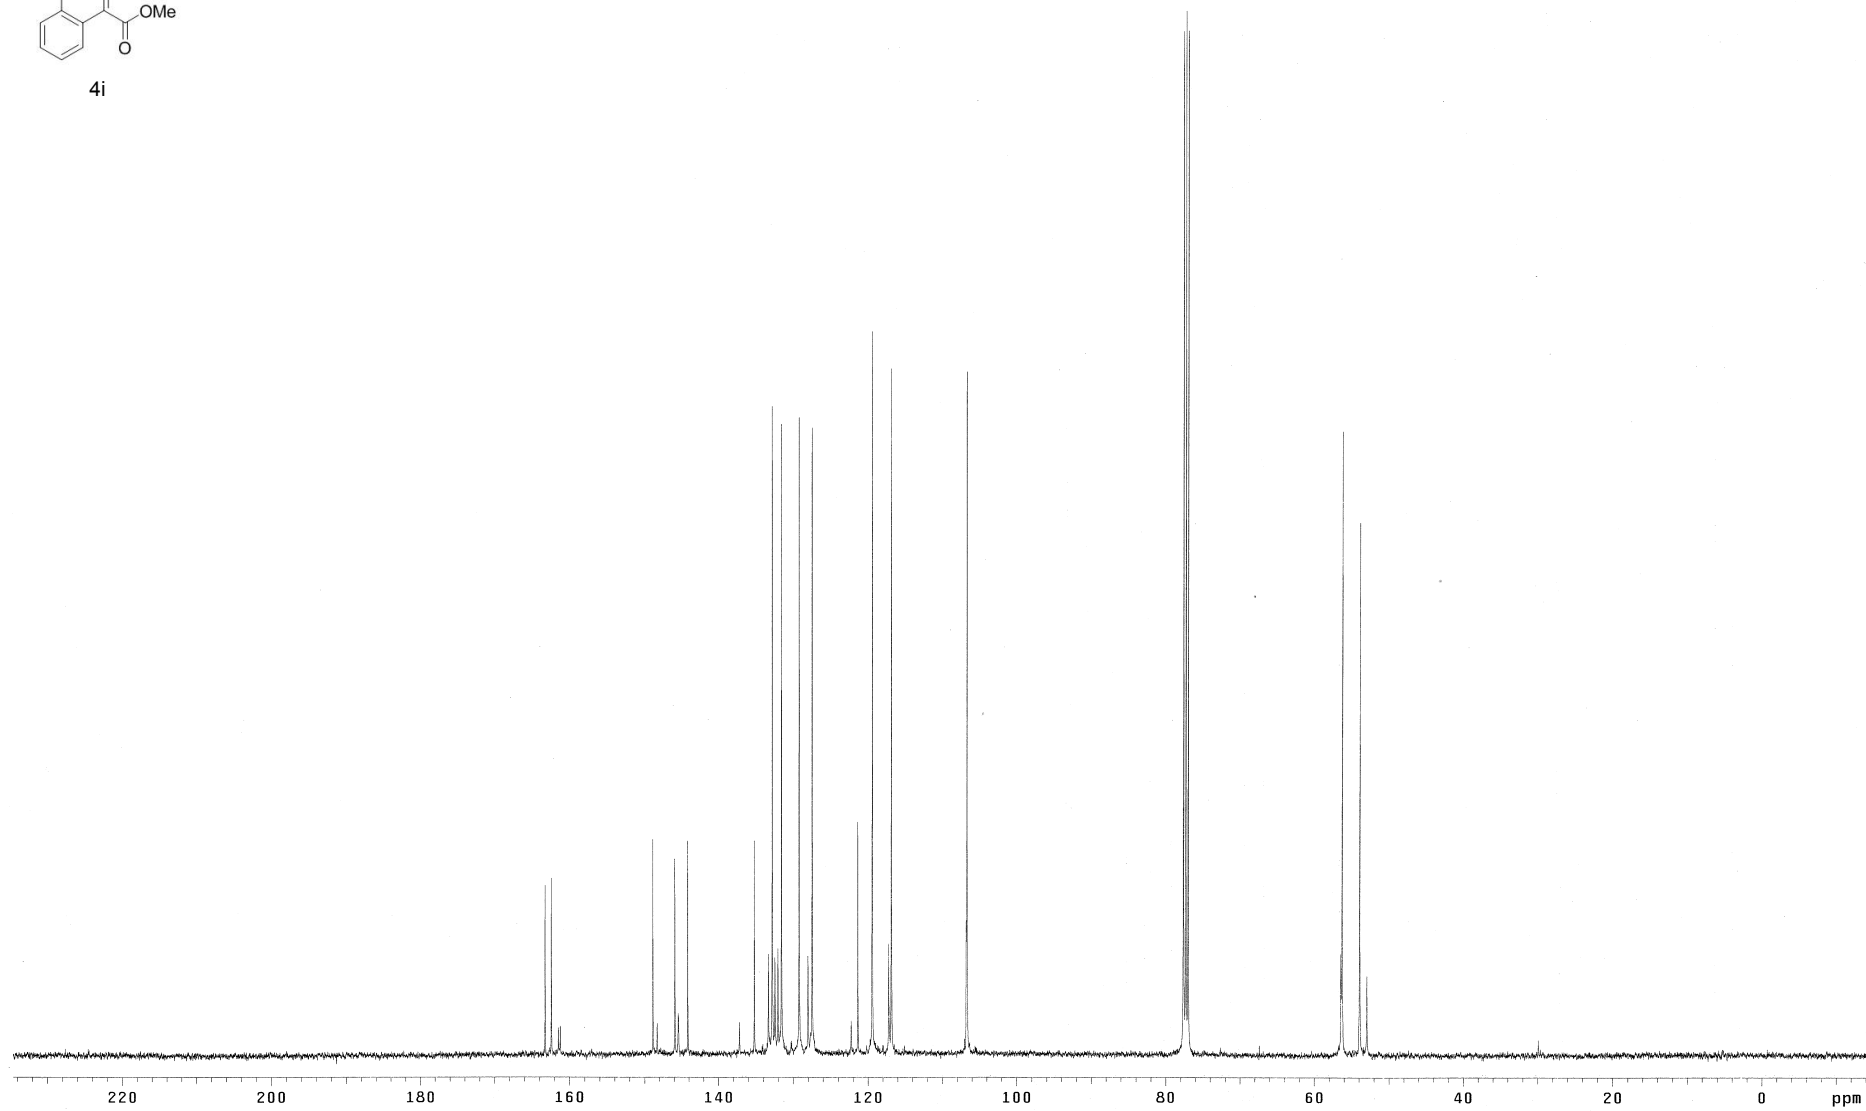

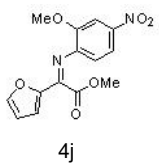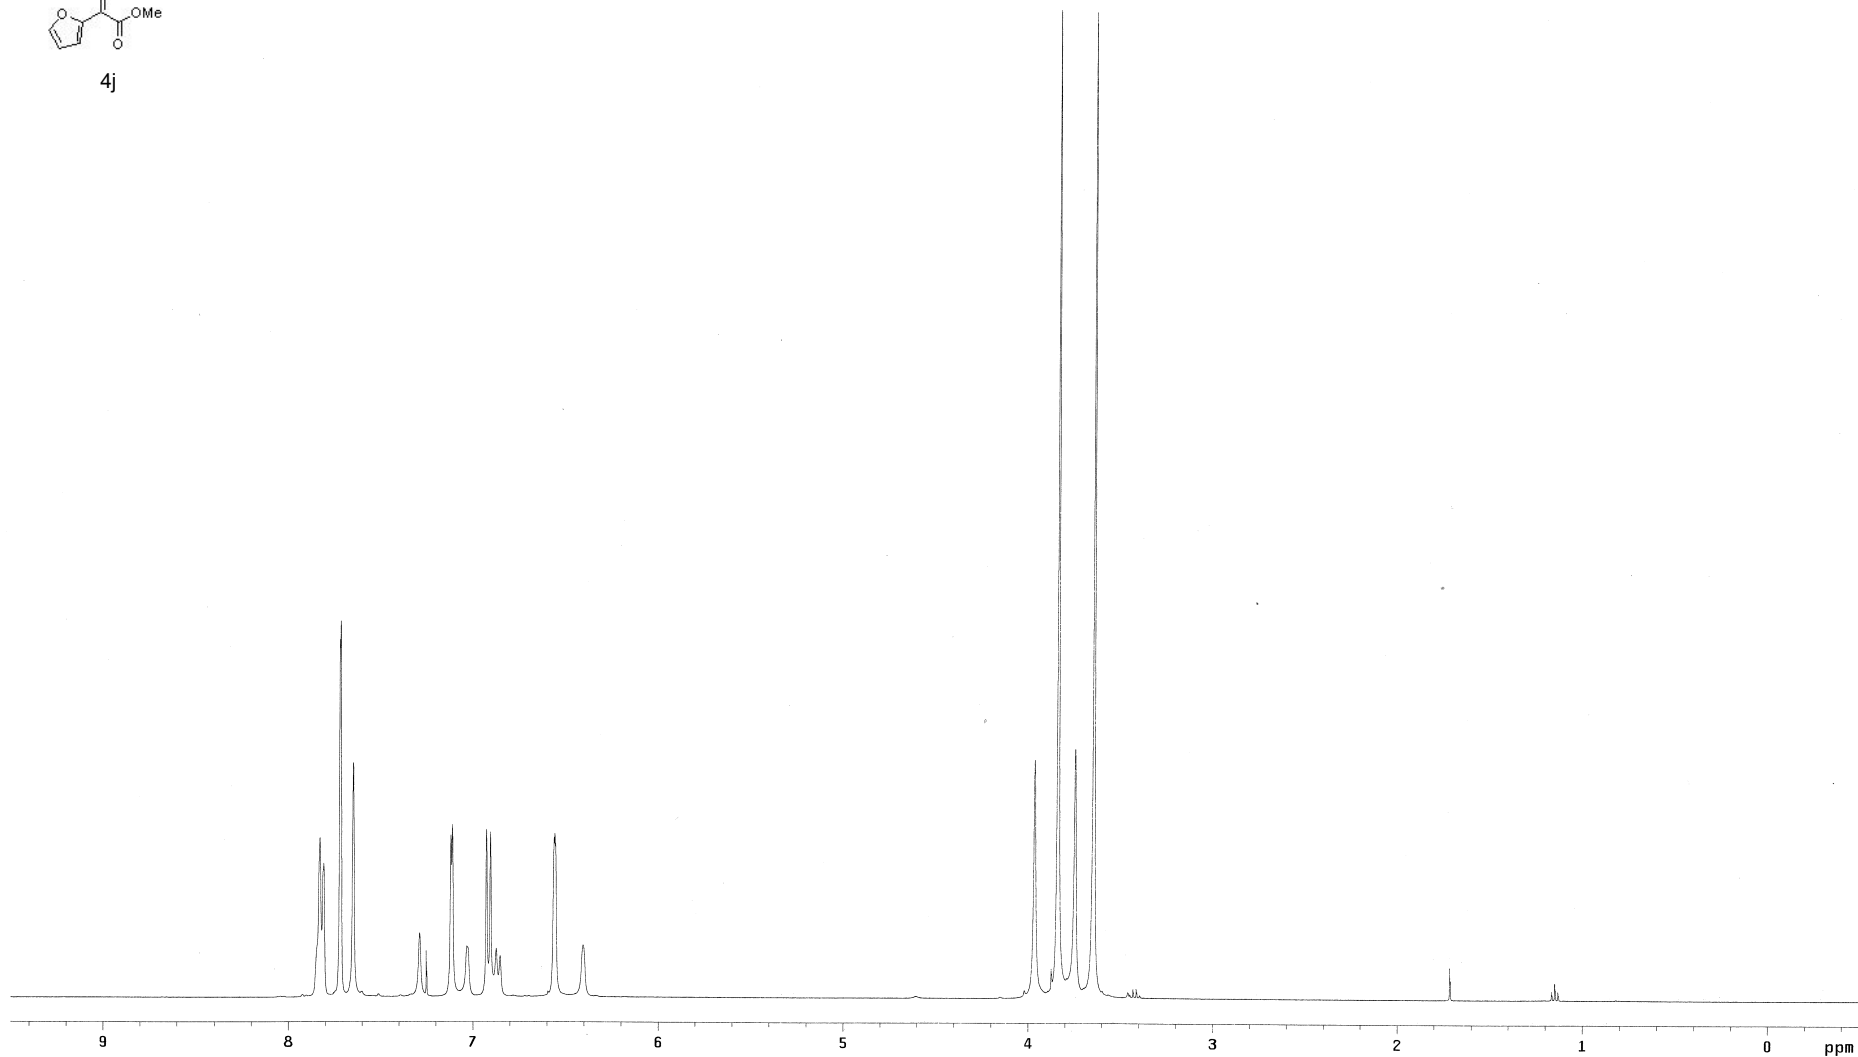



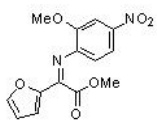

4j

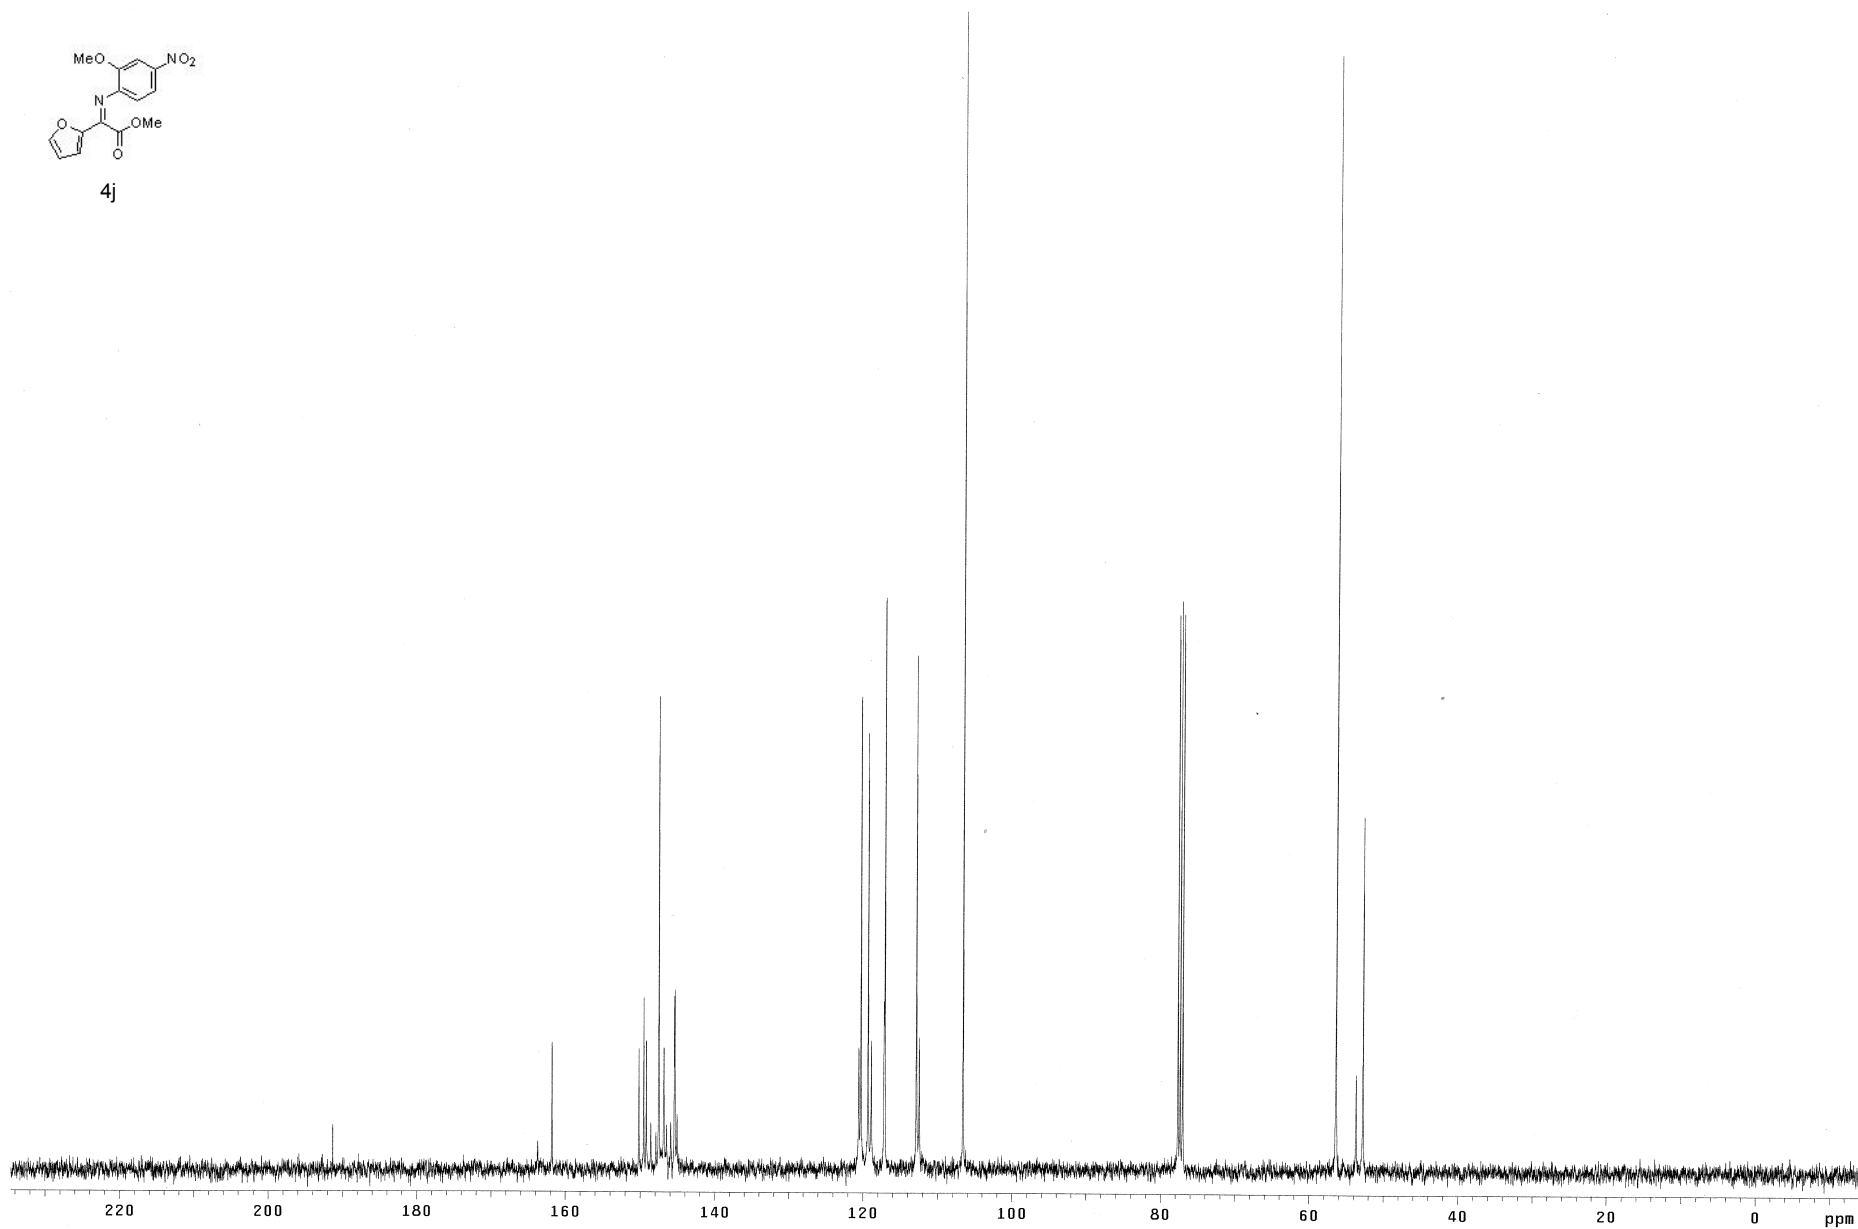

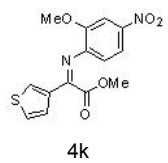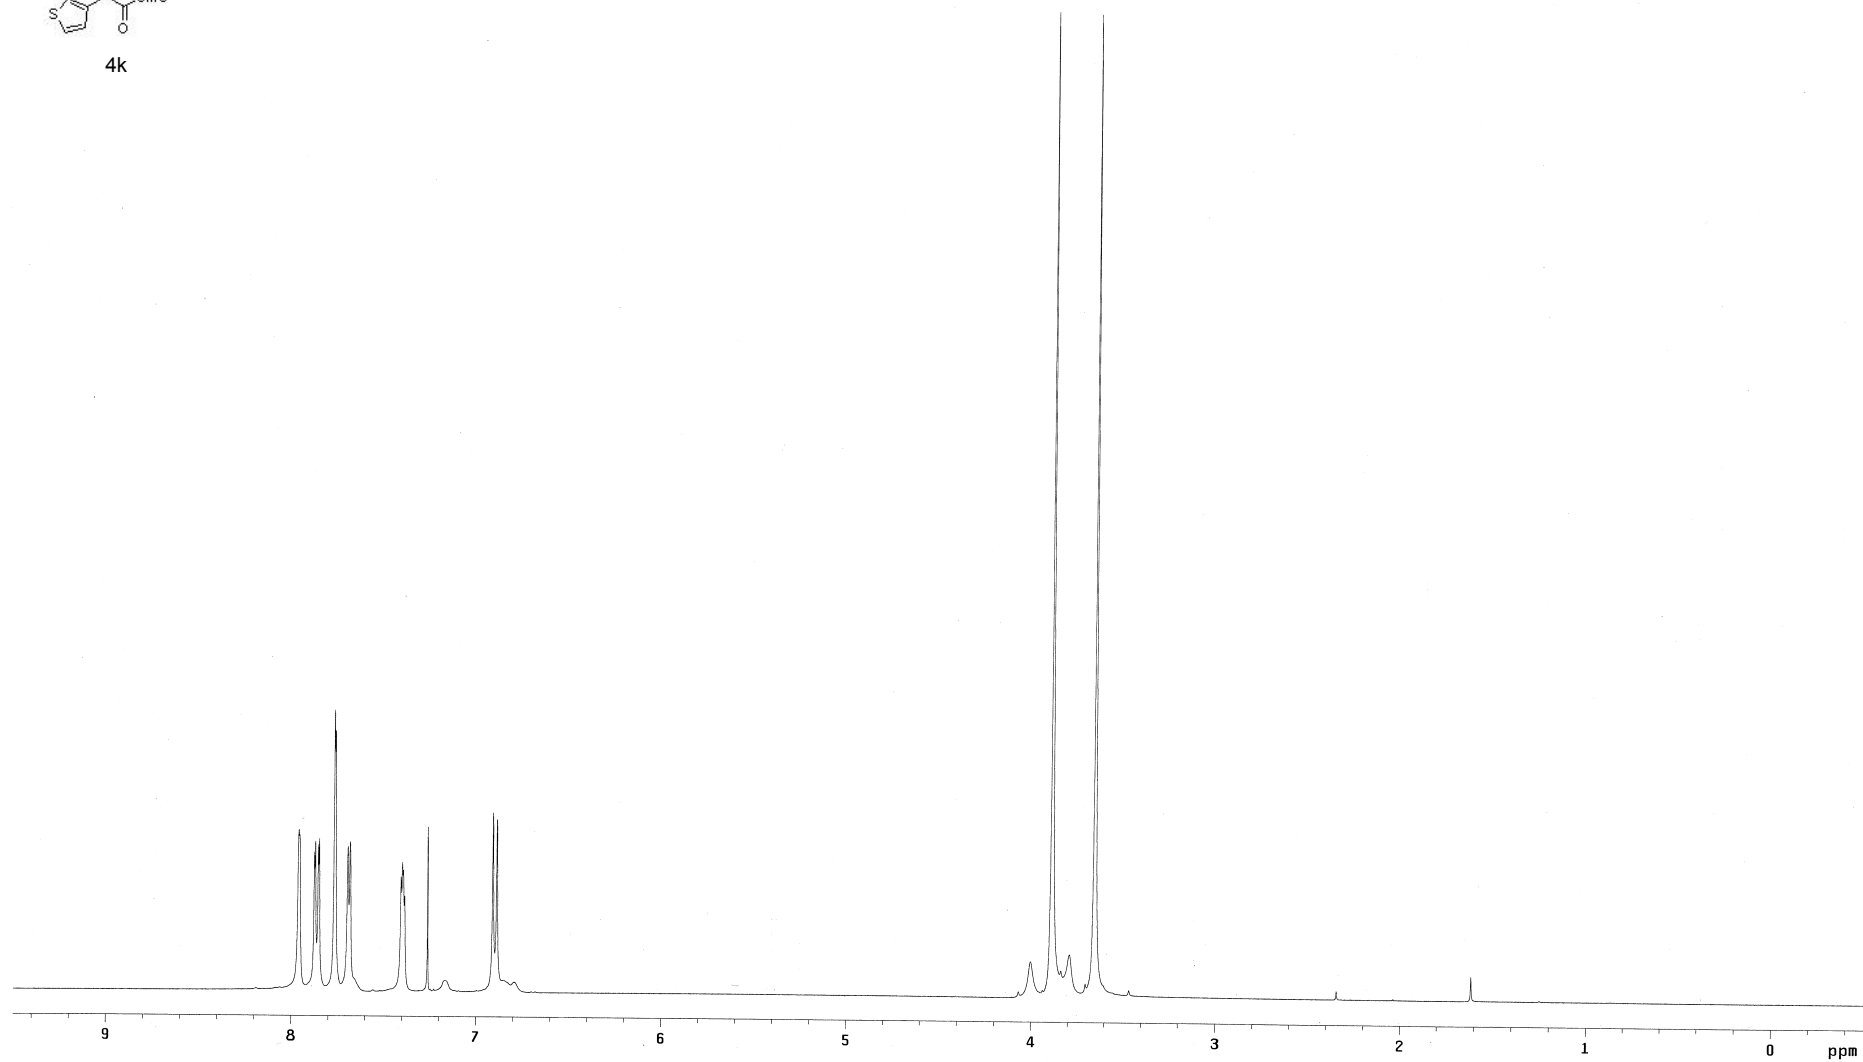

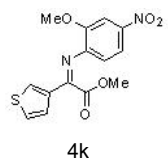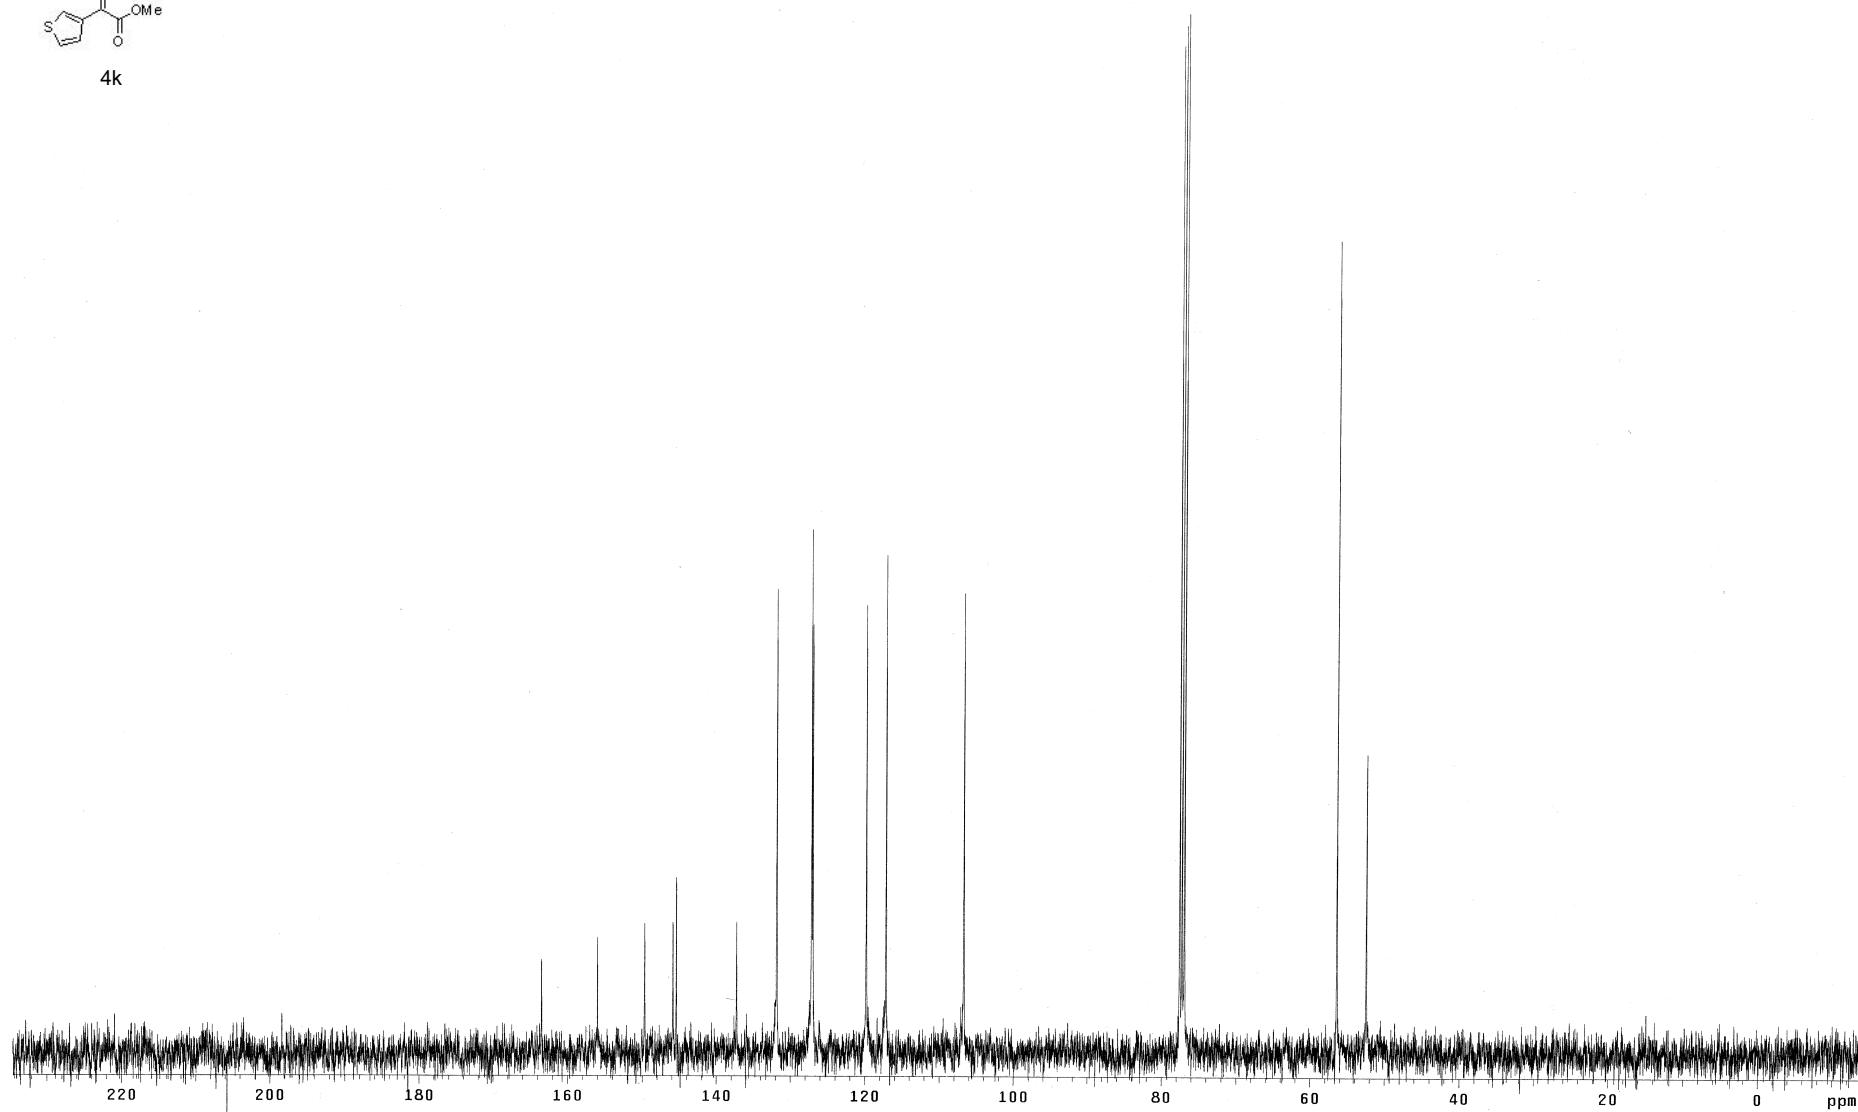

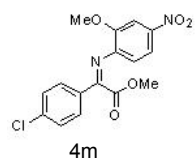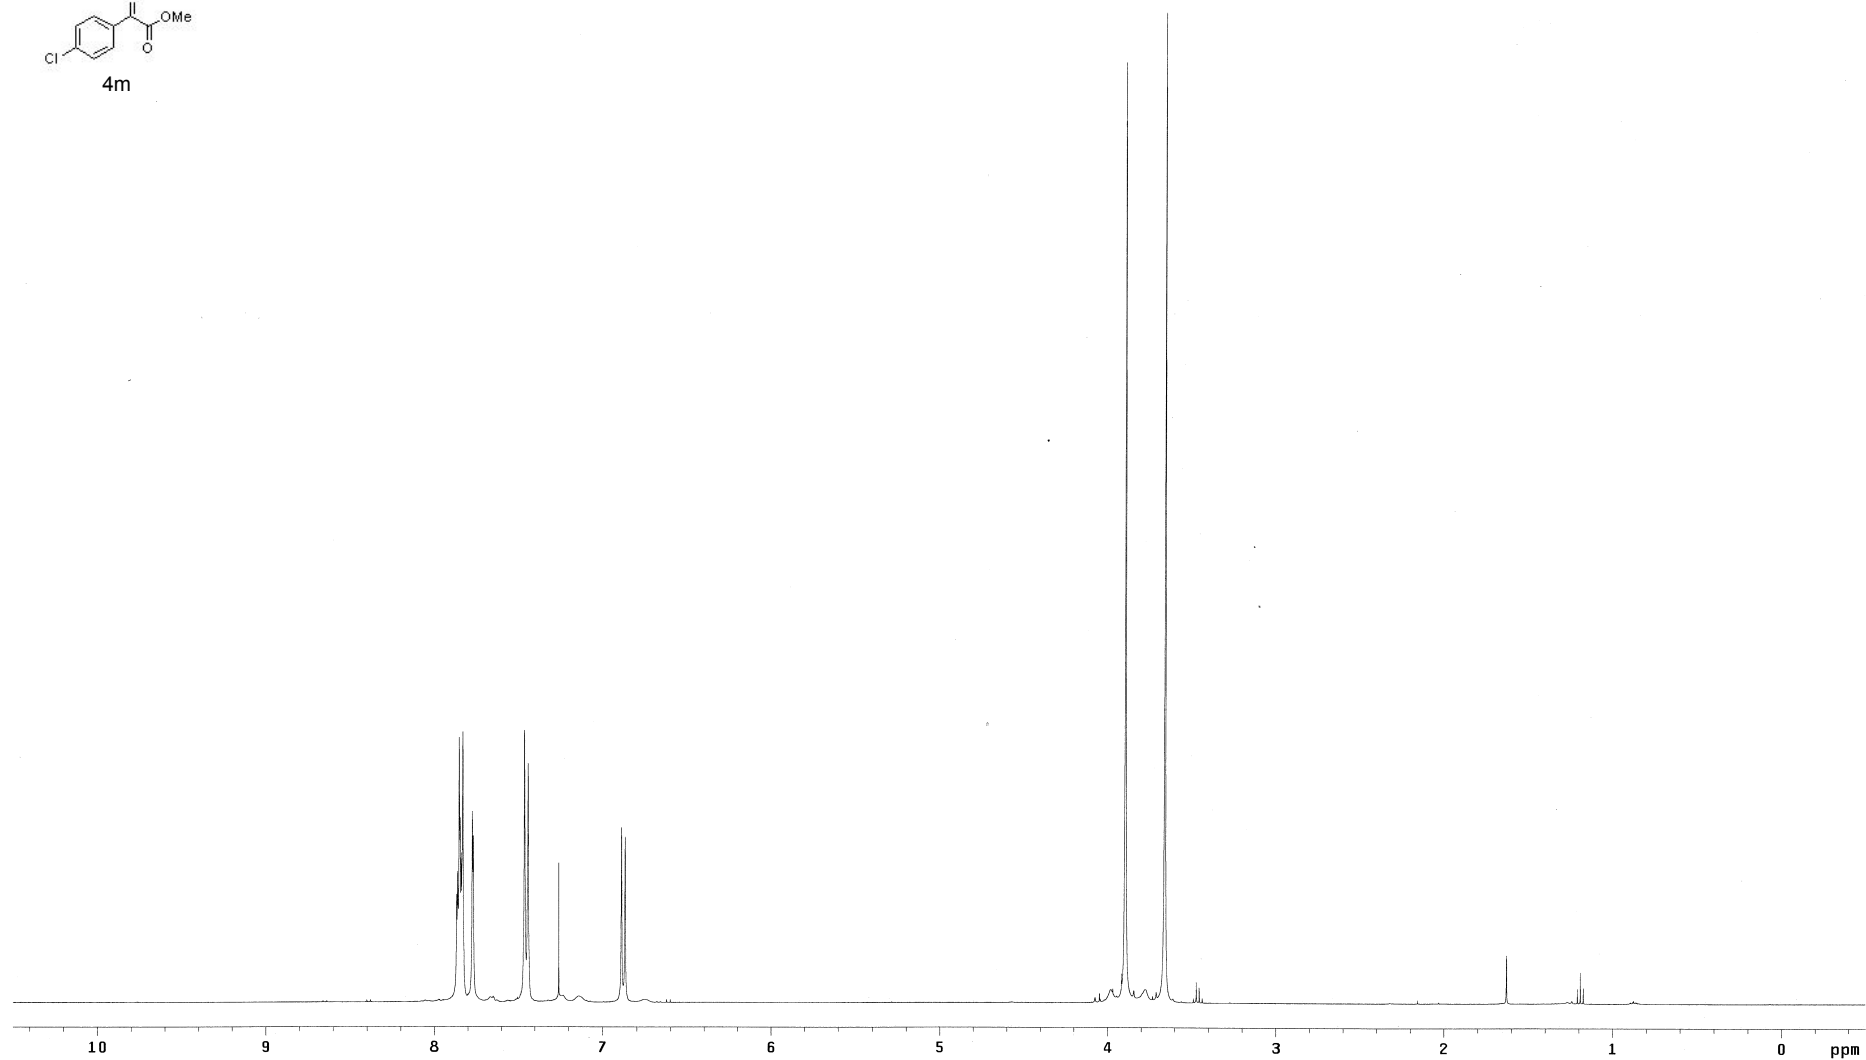

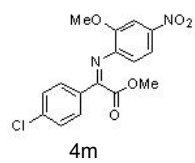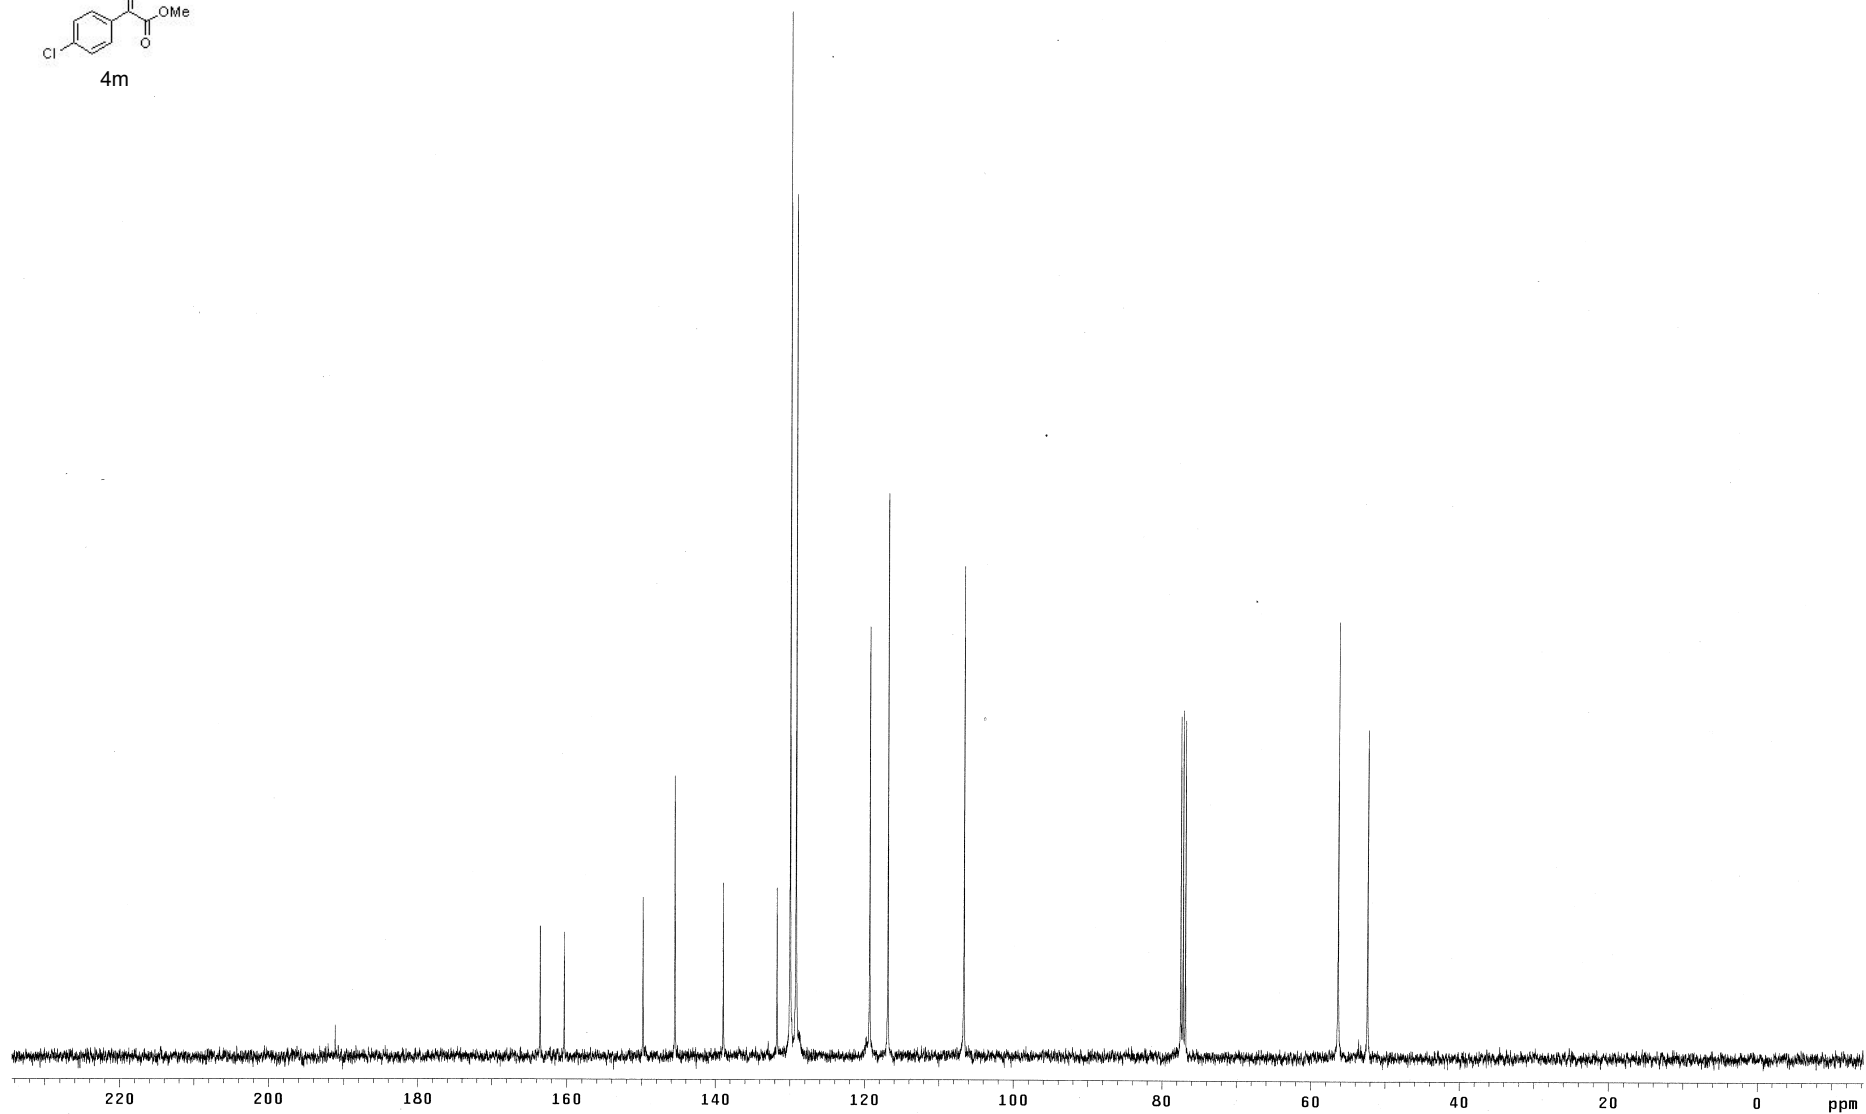

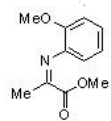

15

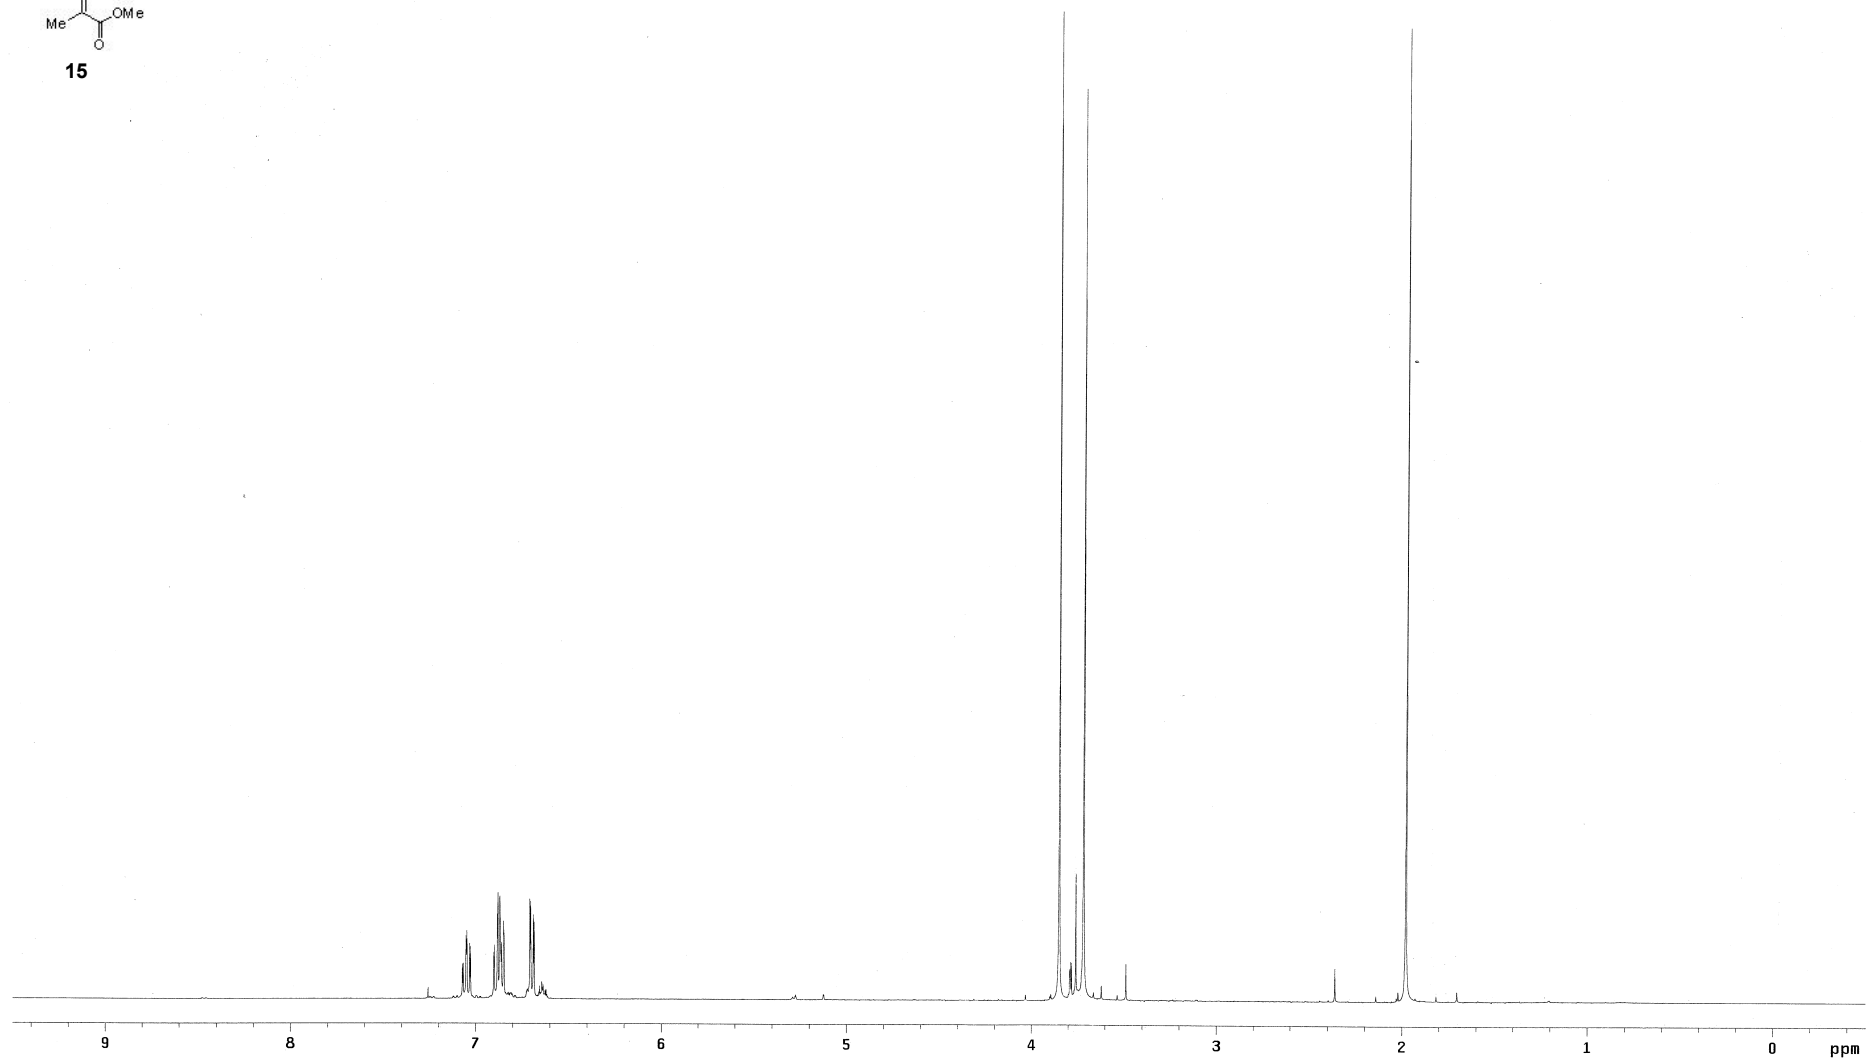

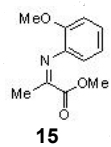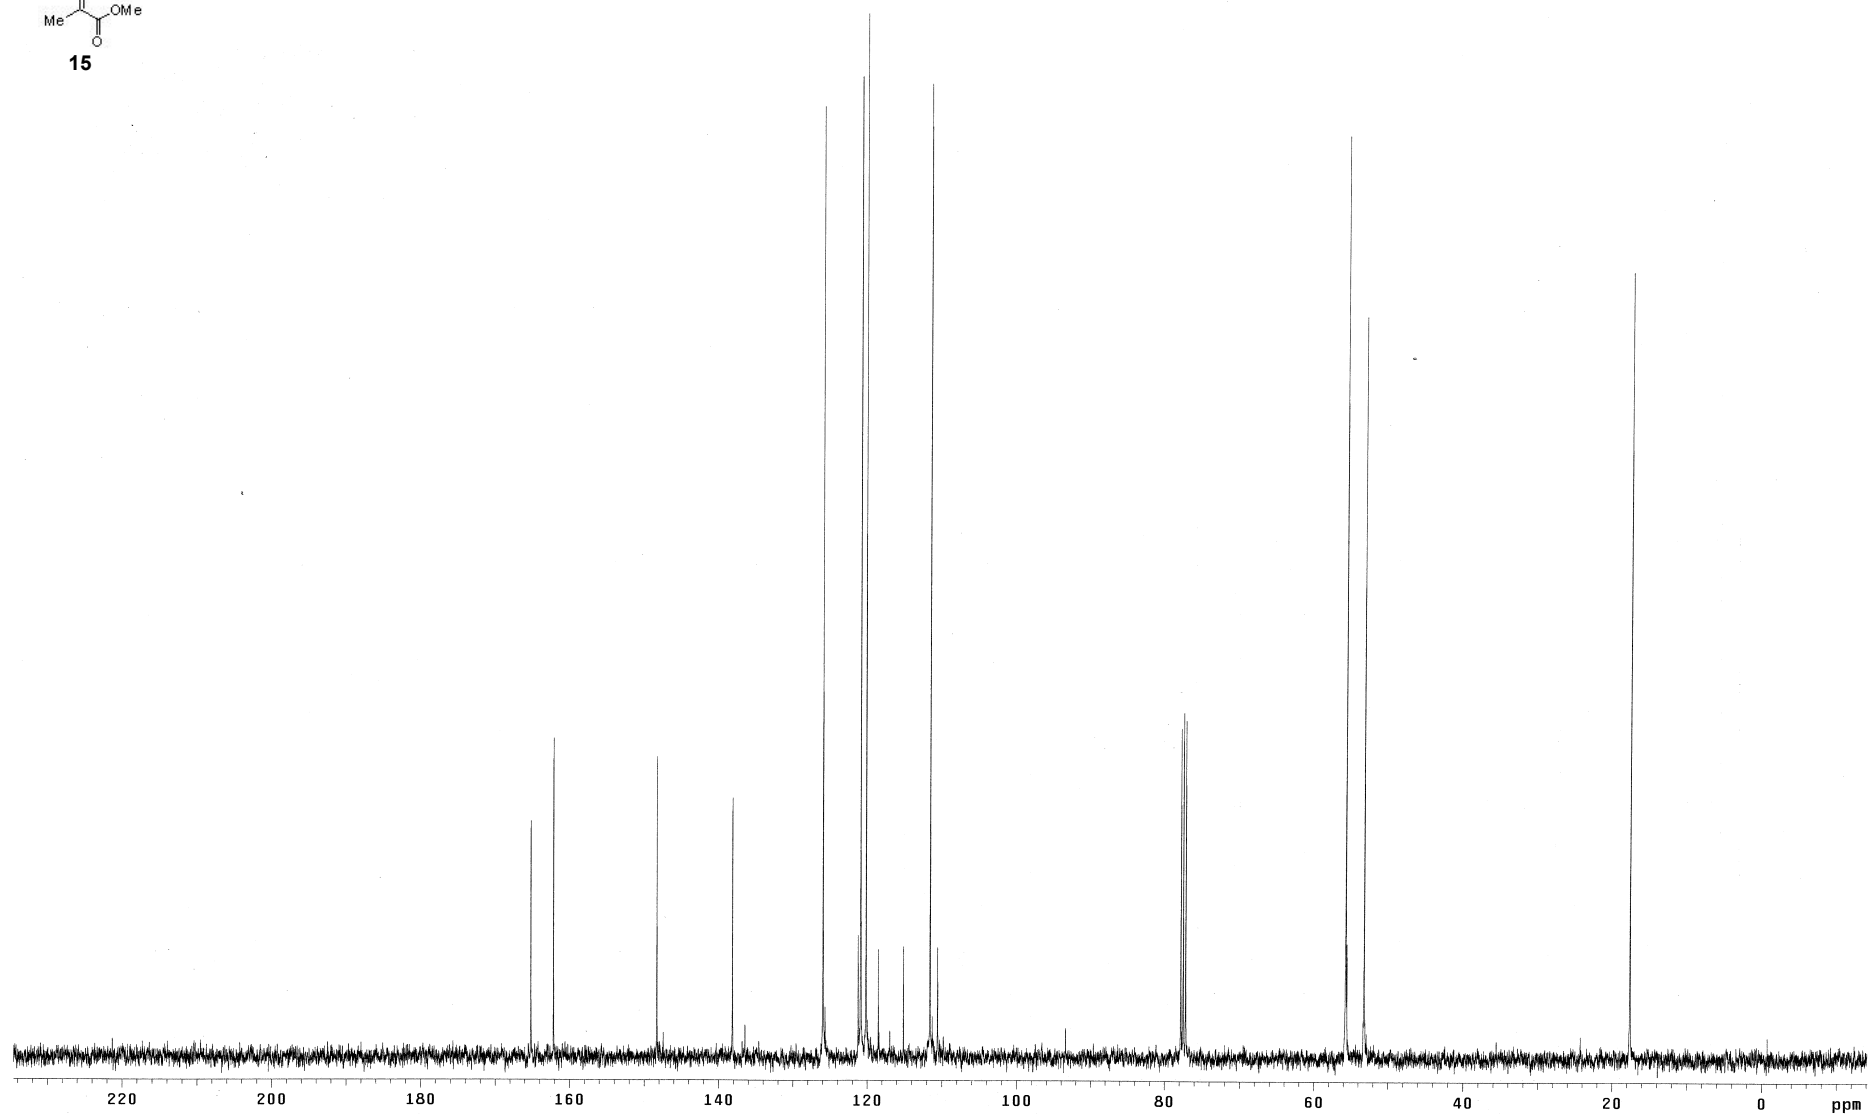

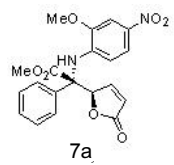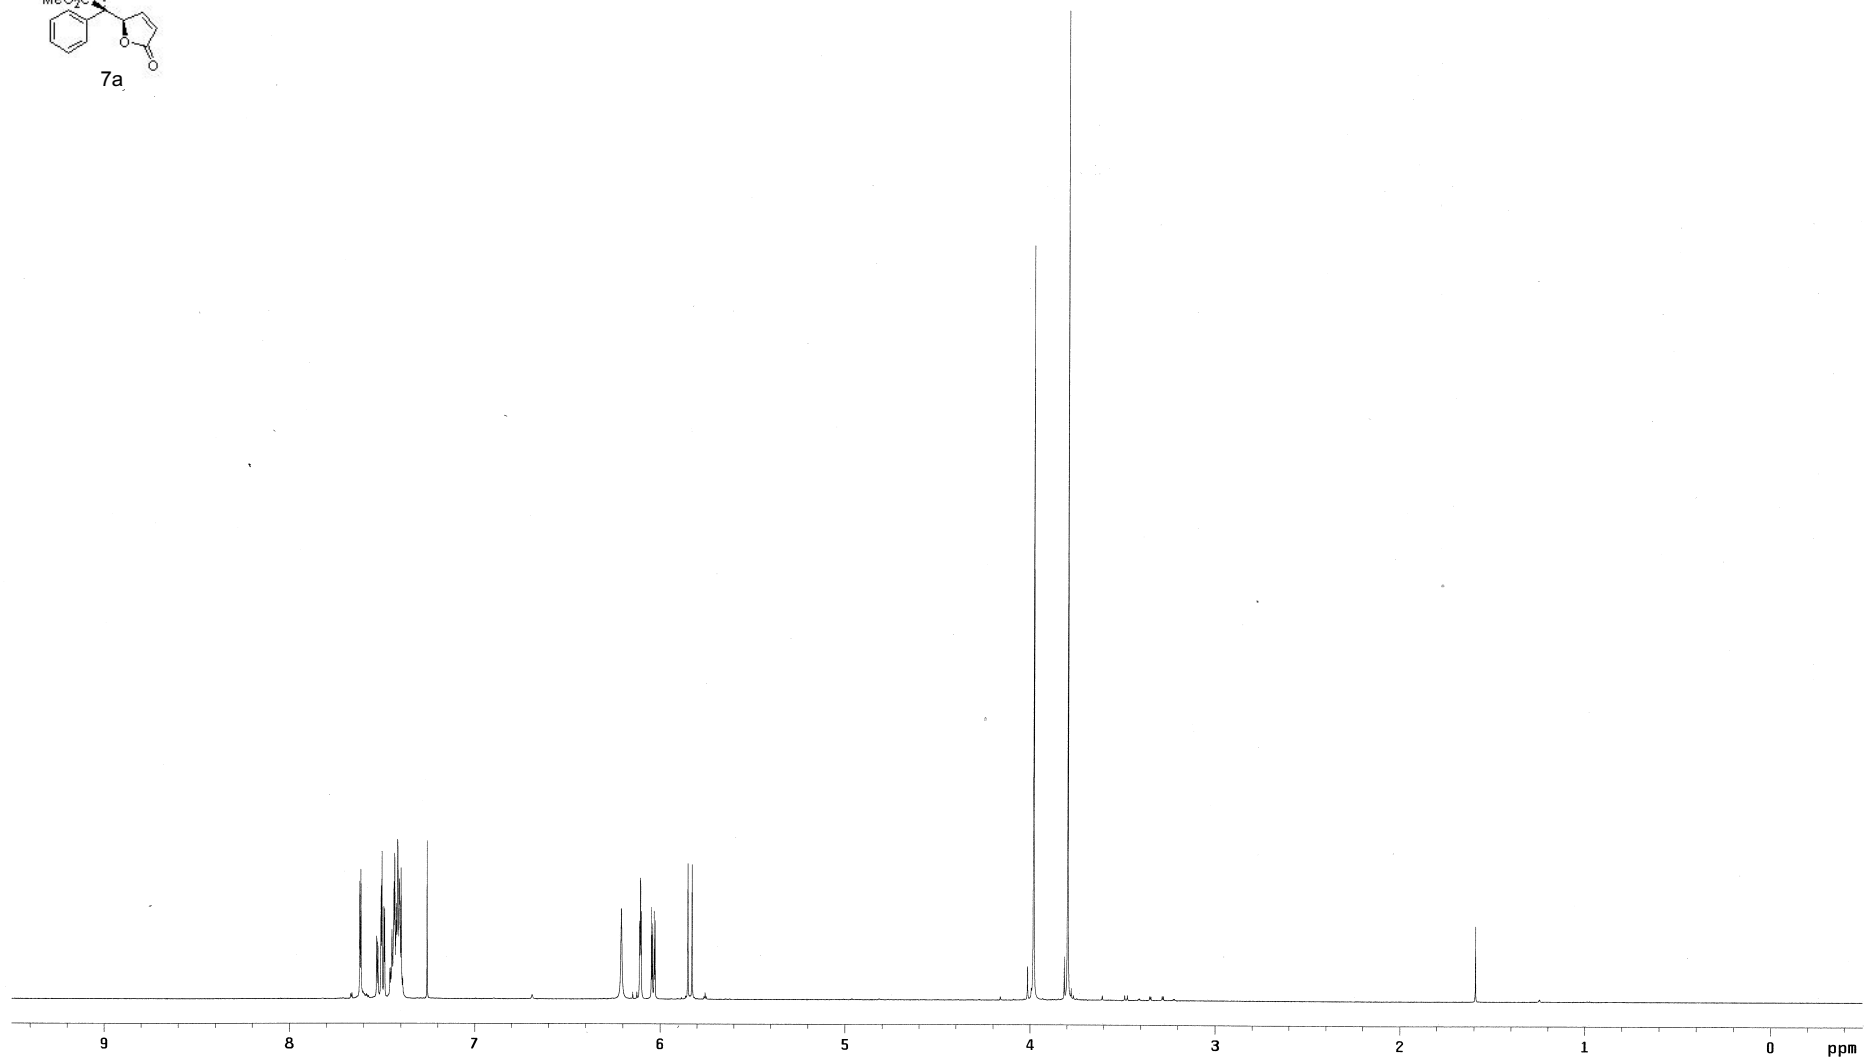



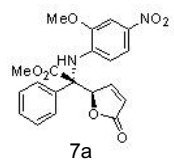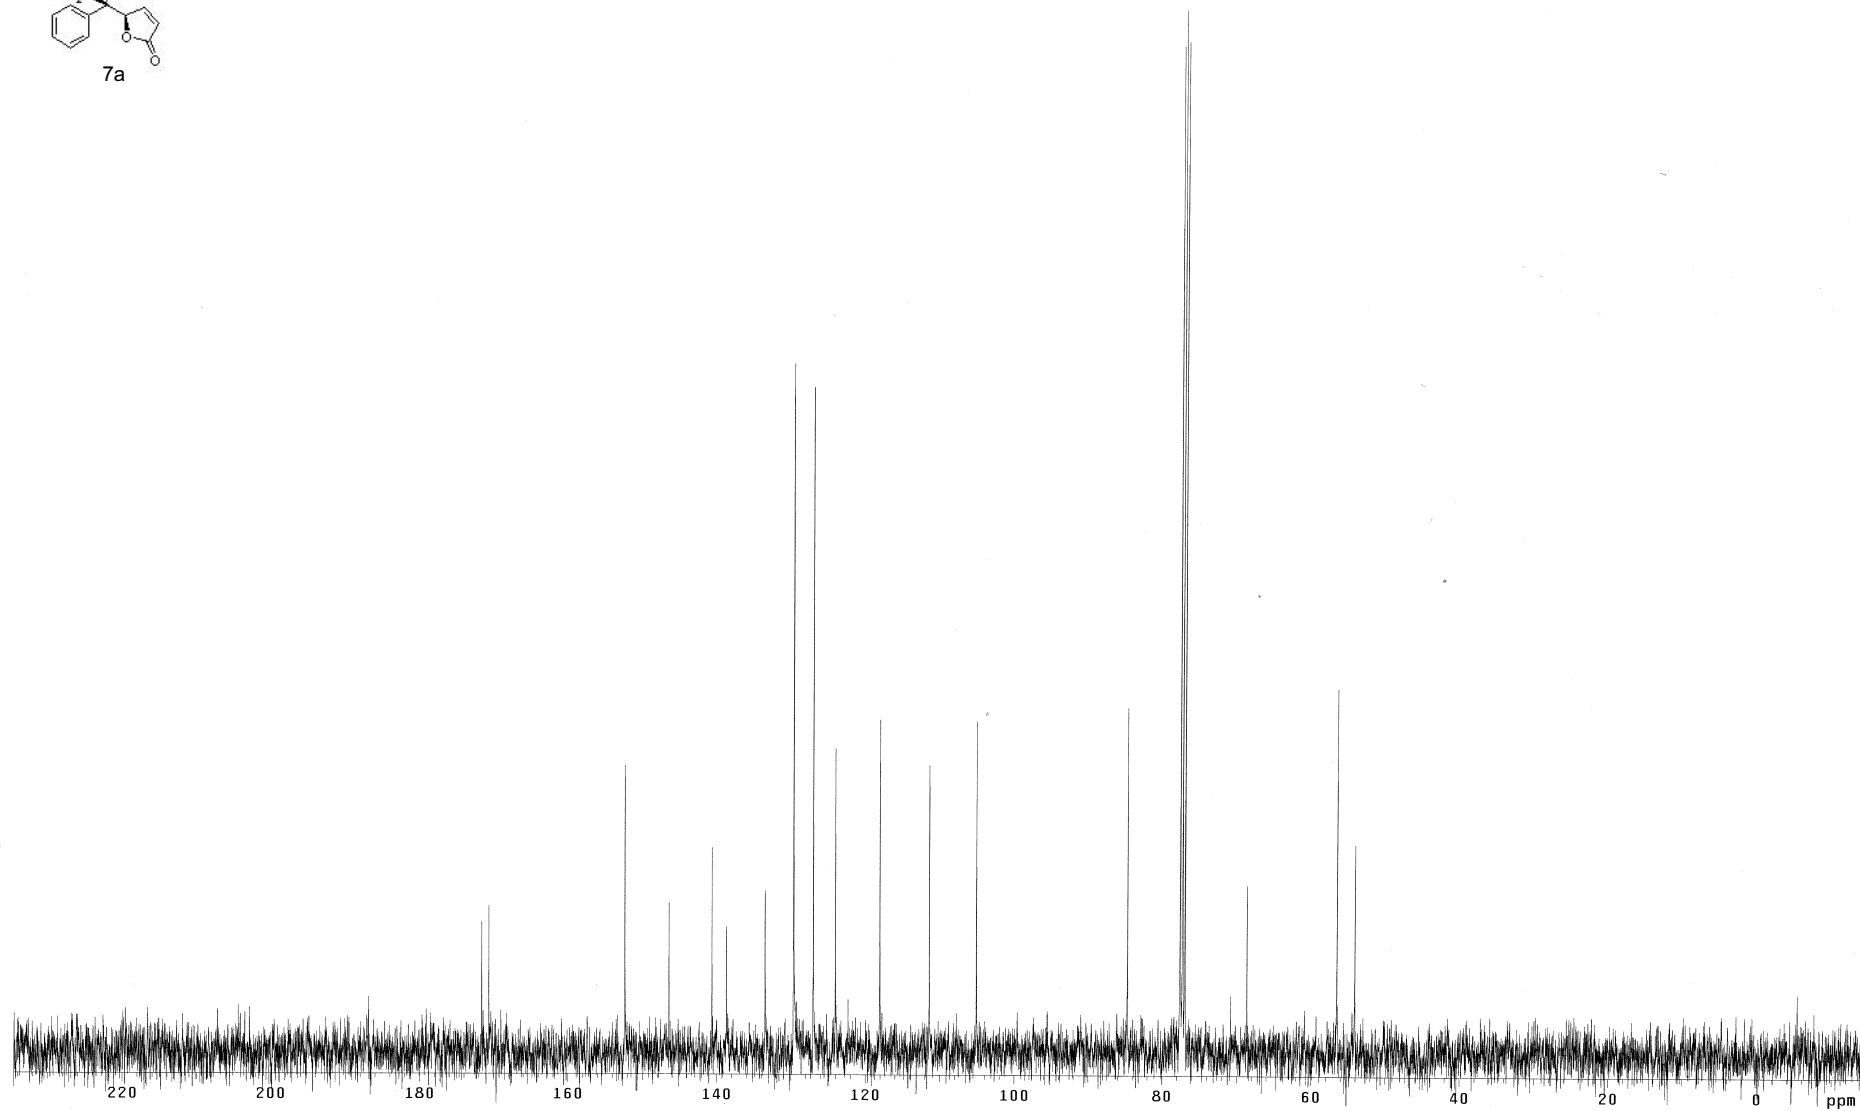

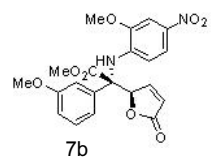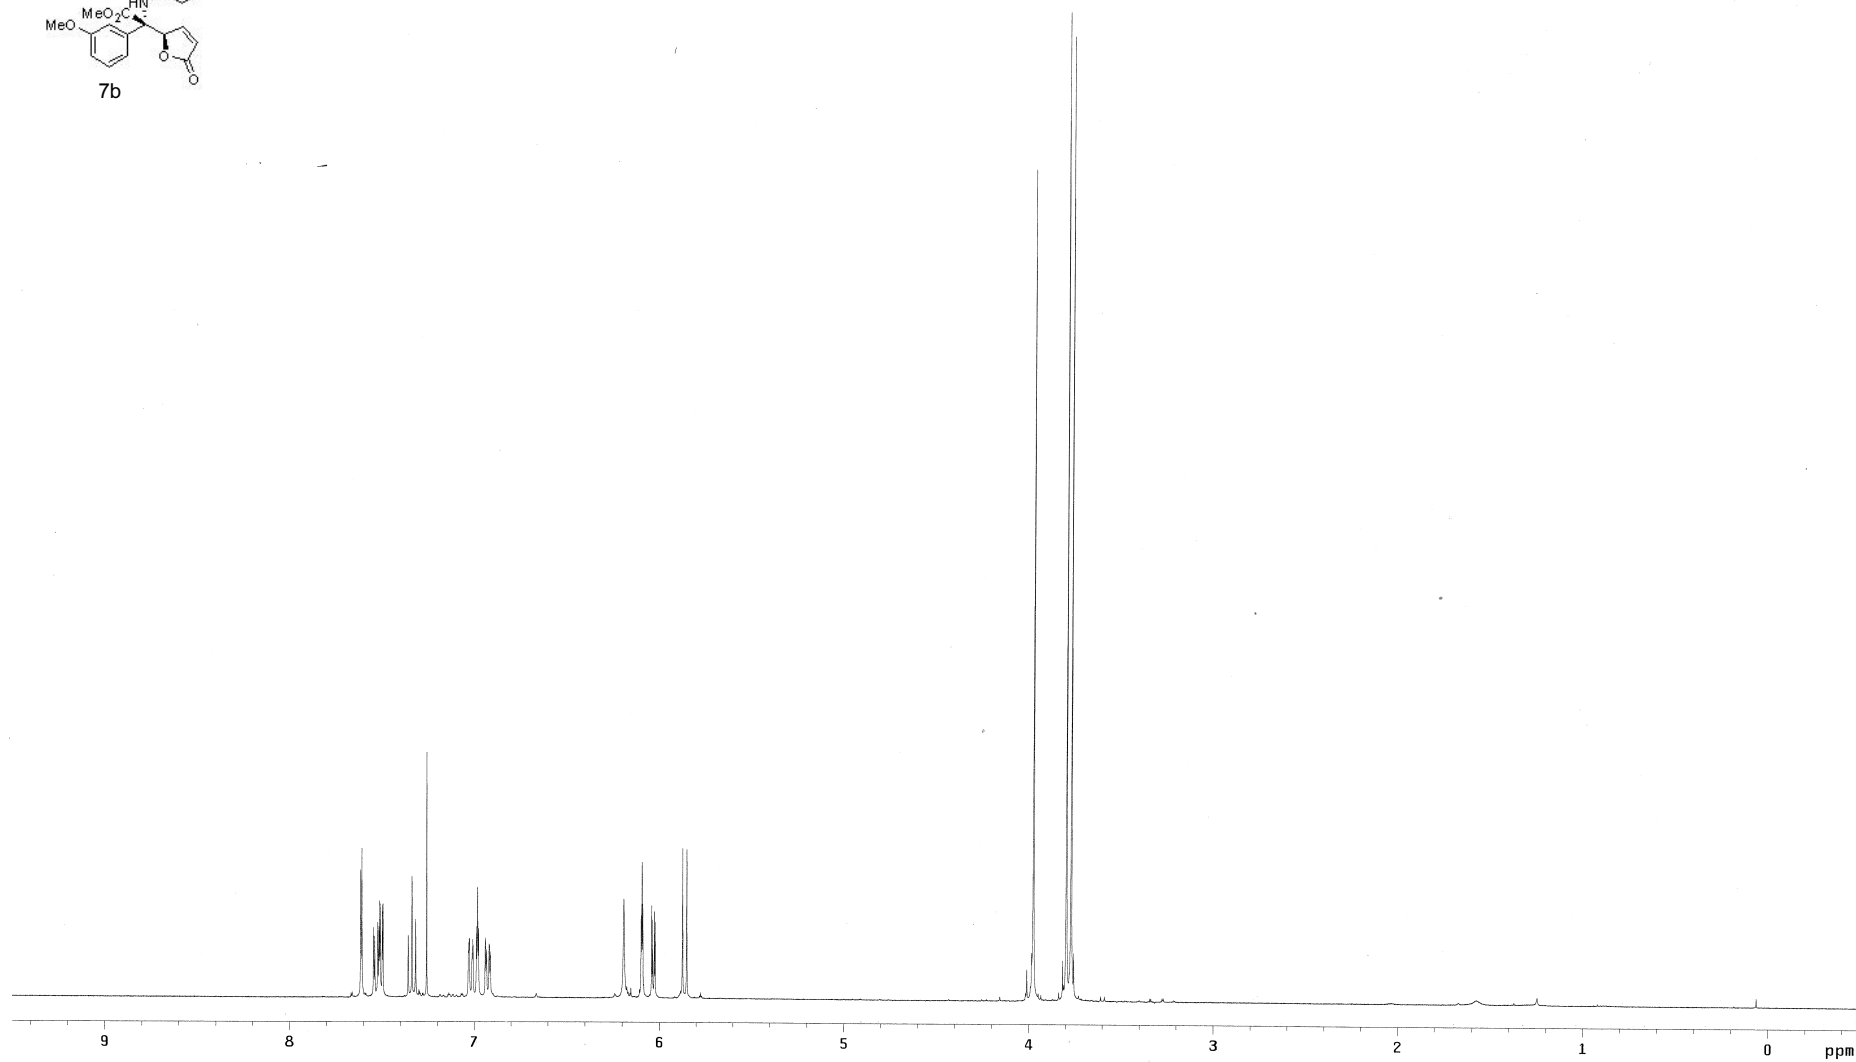

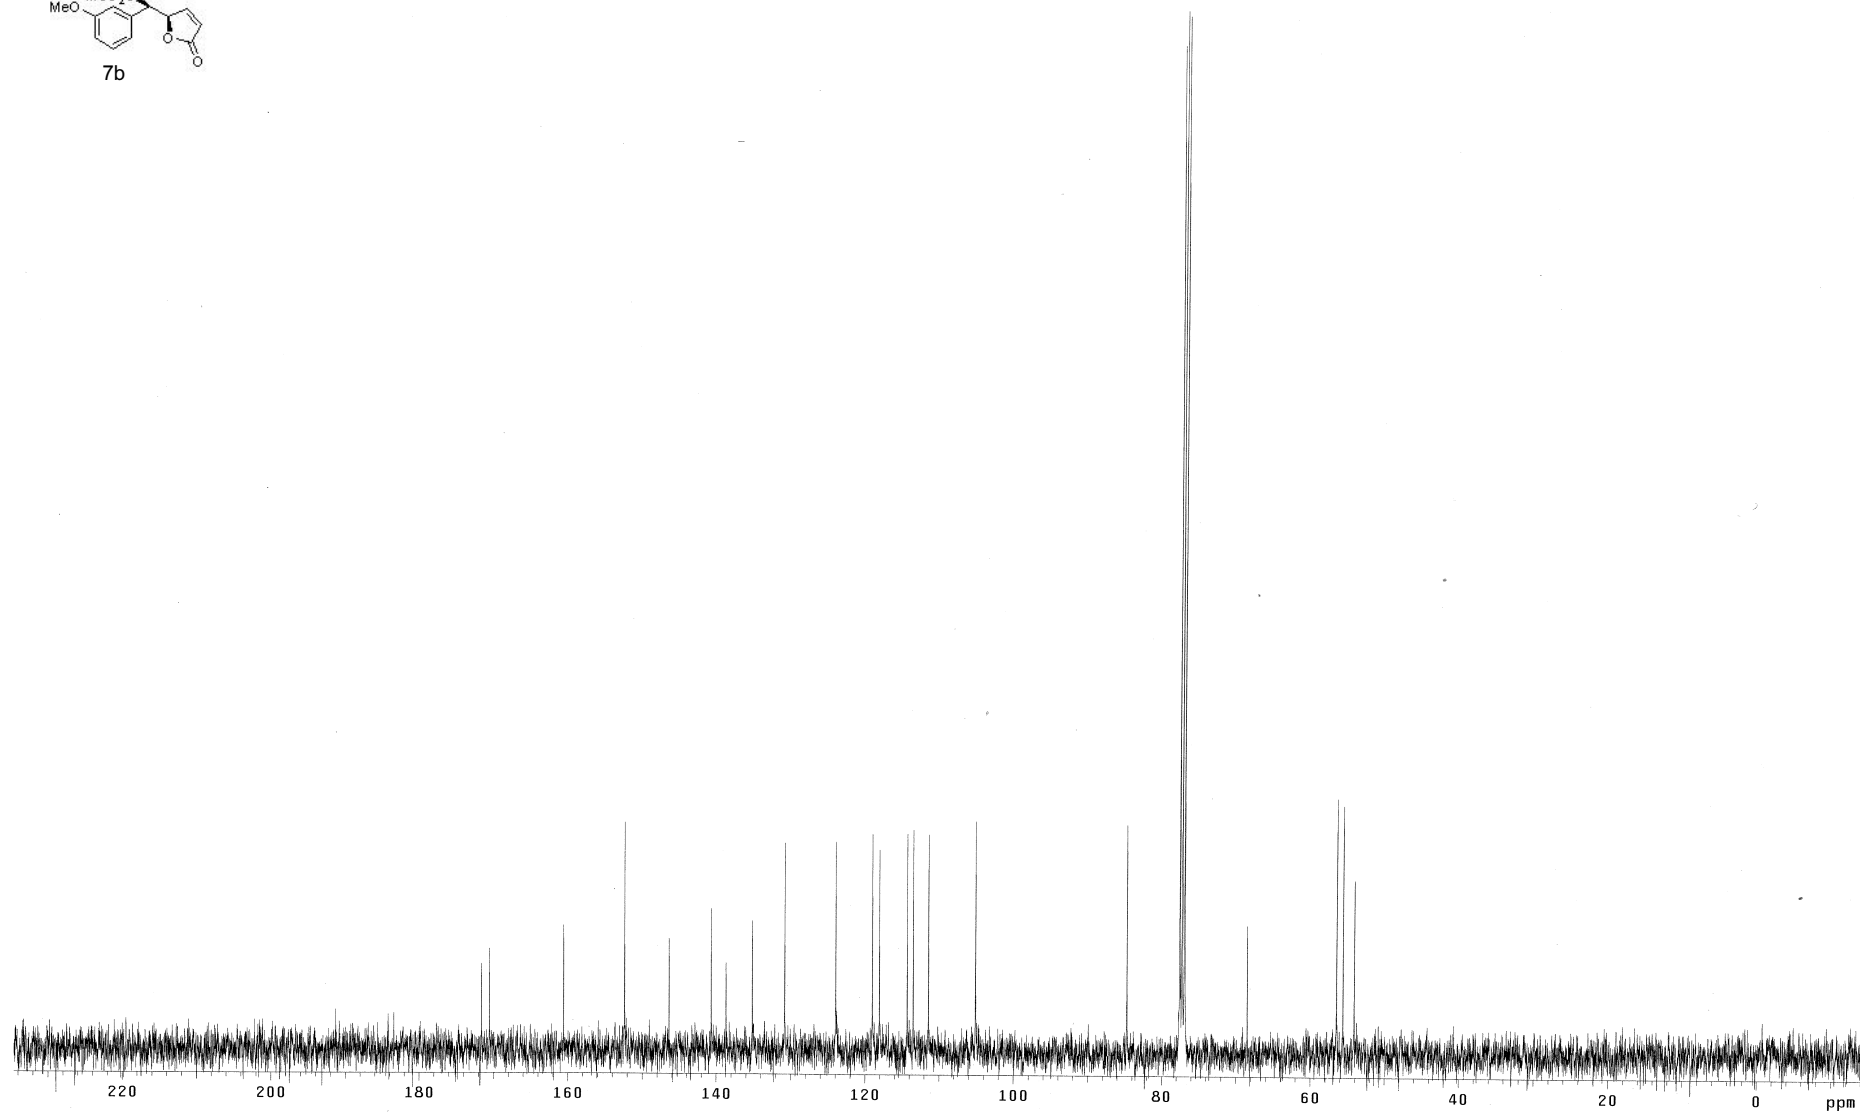

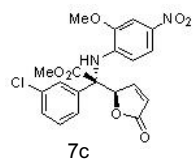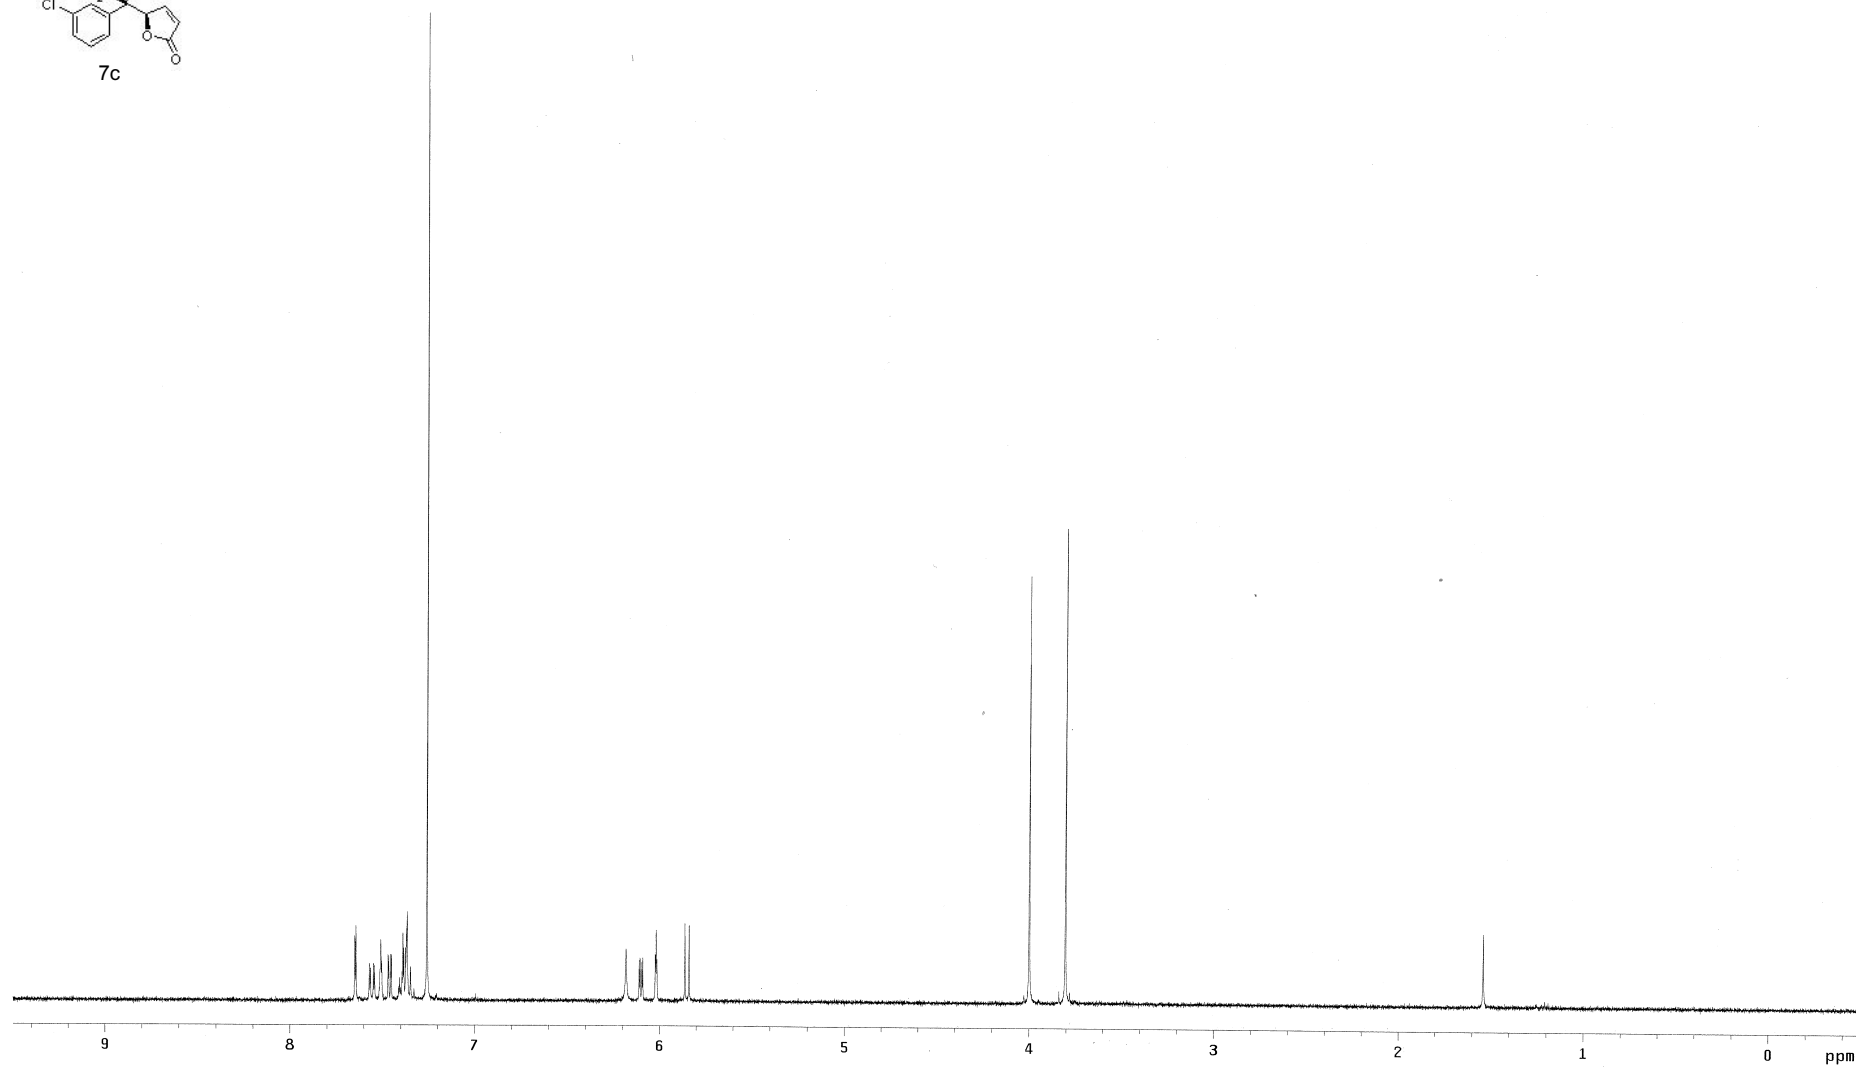

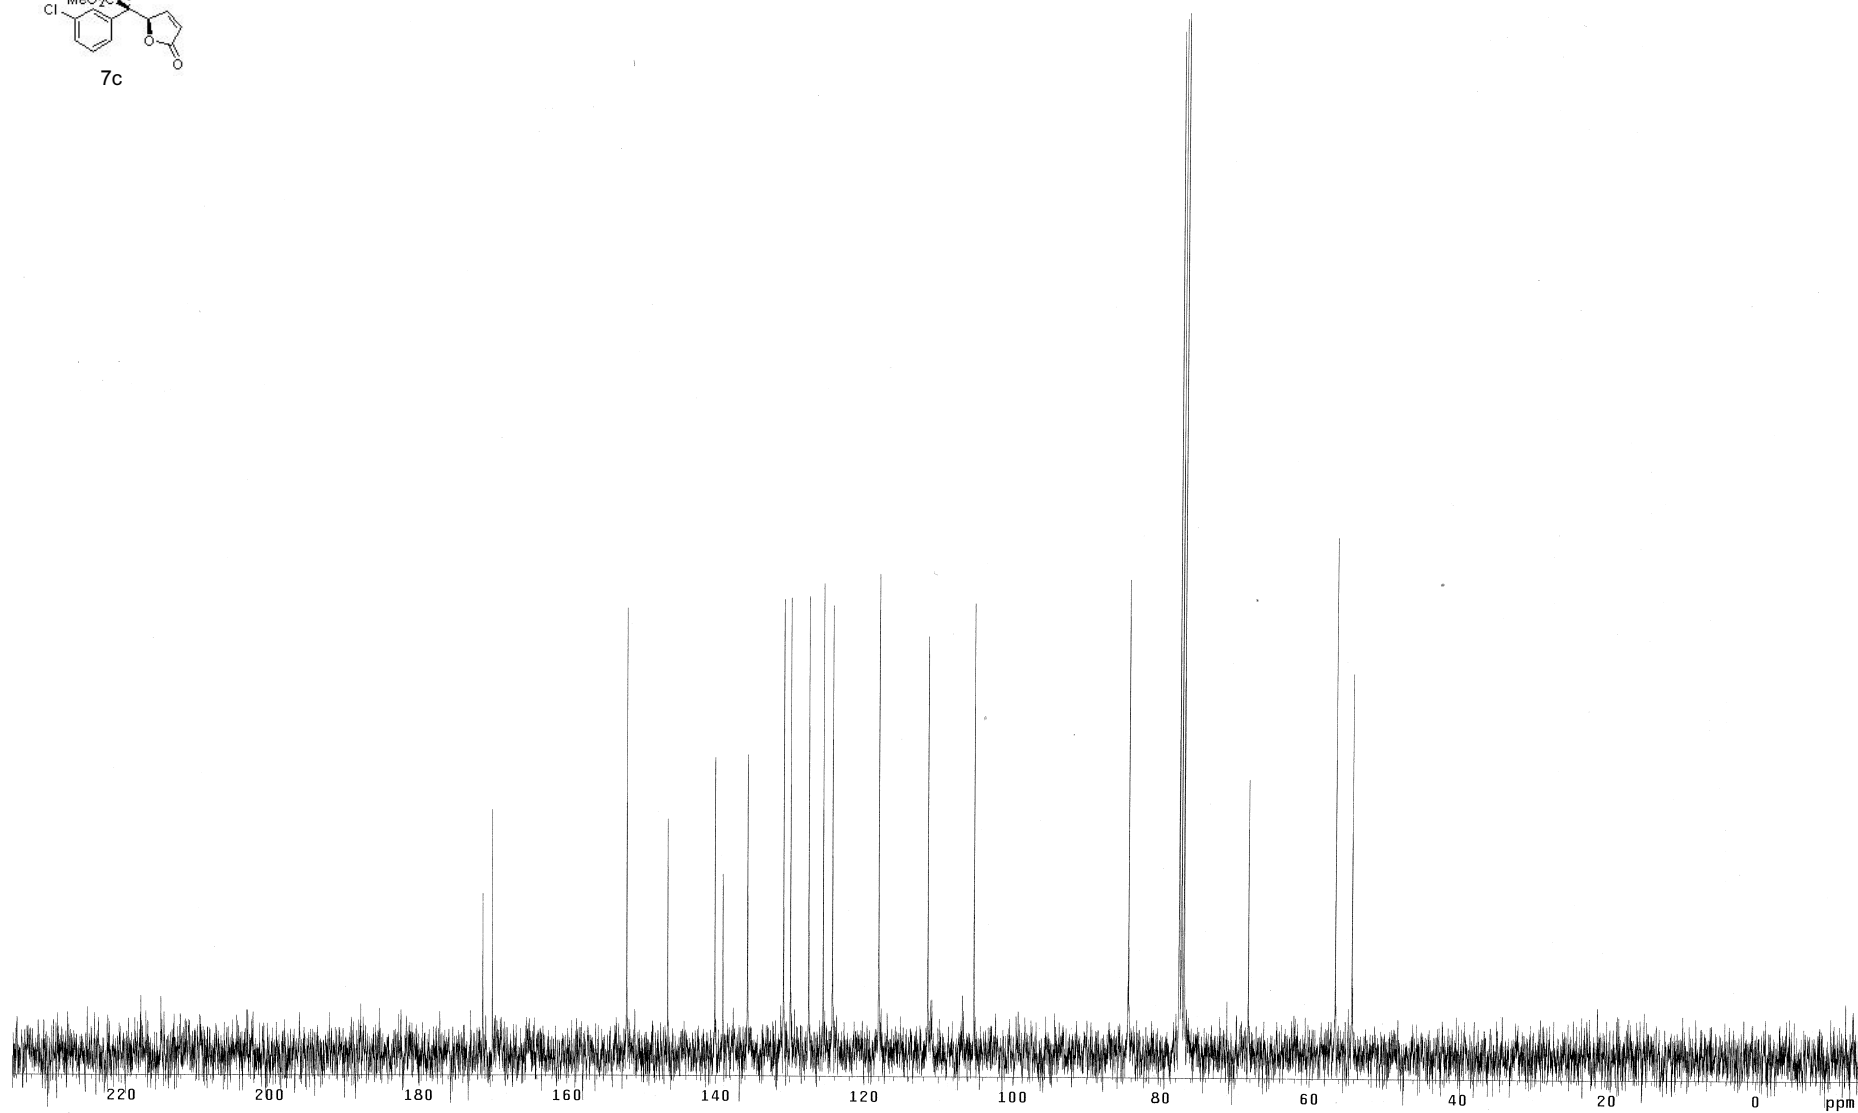

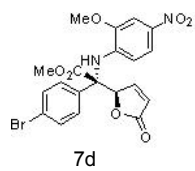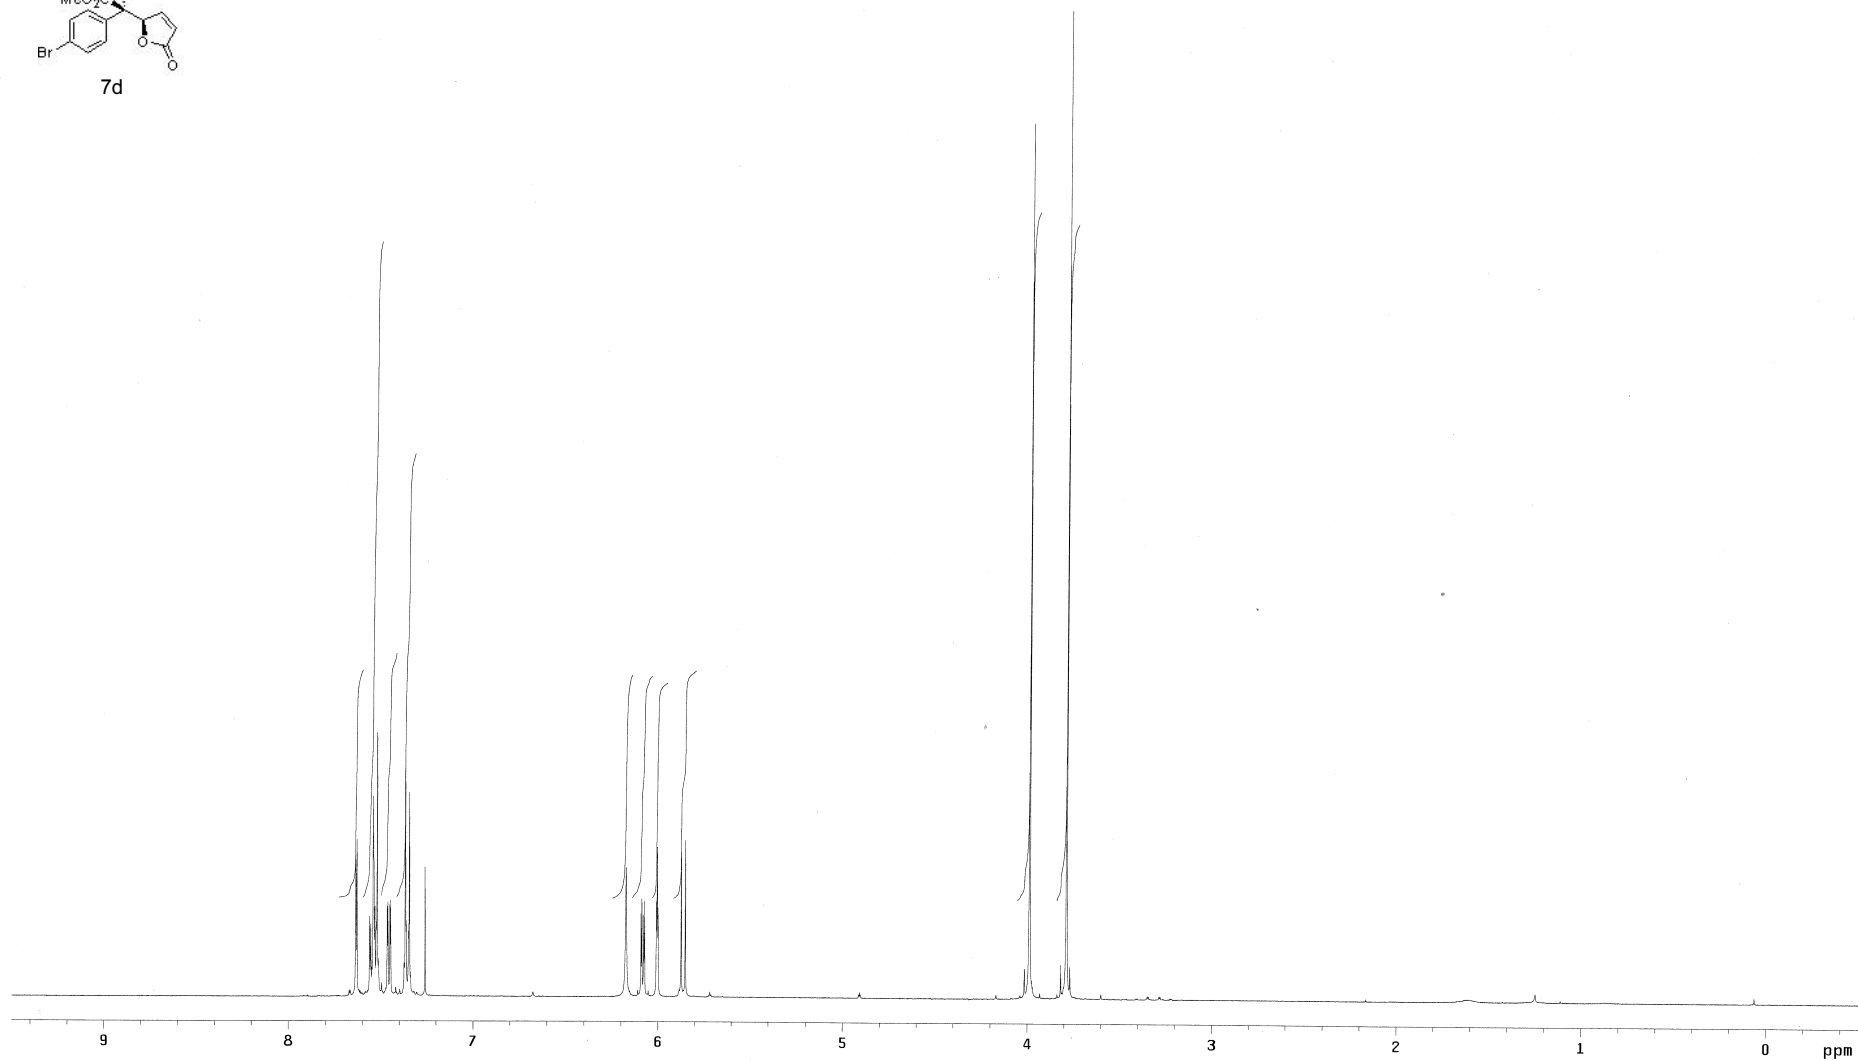

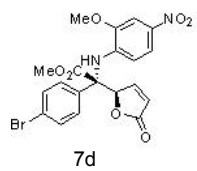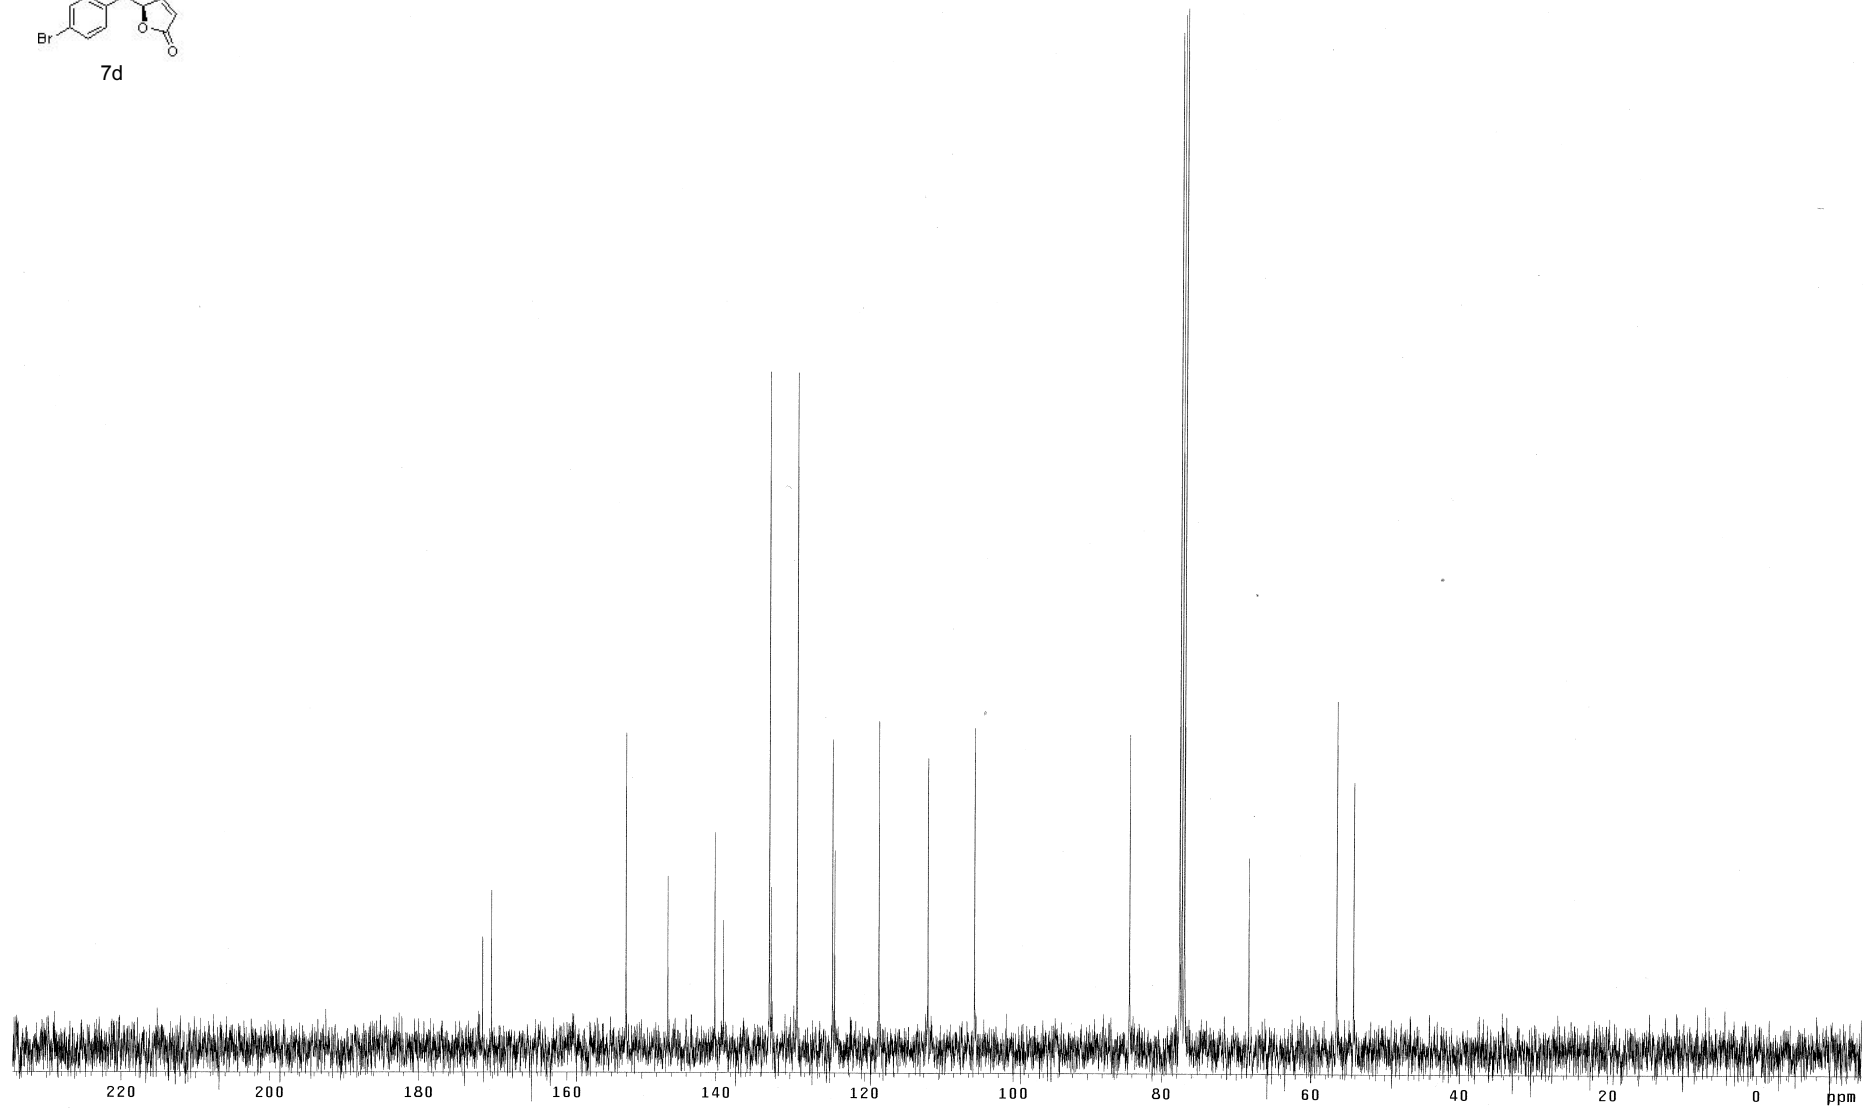

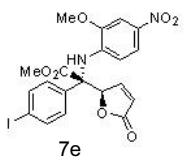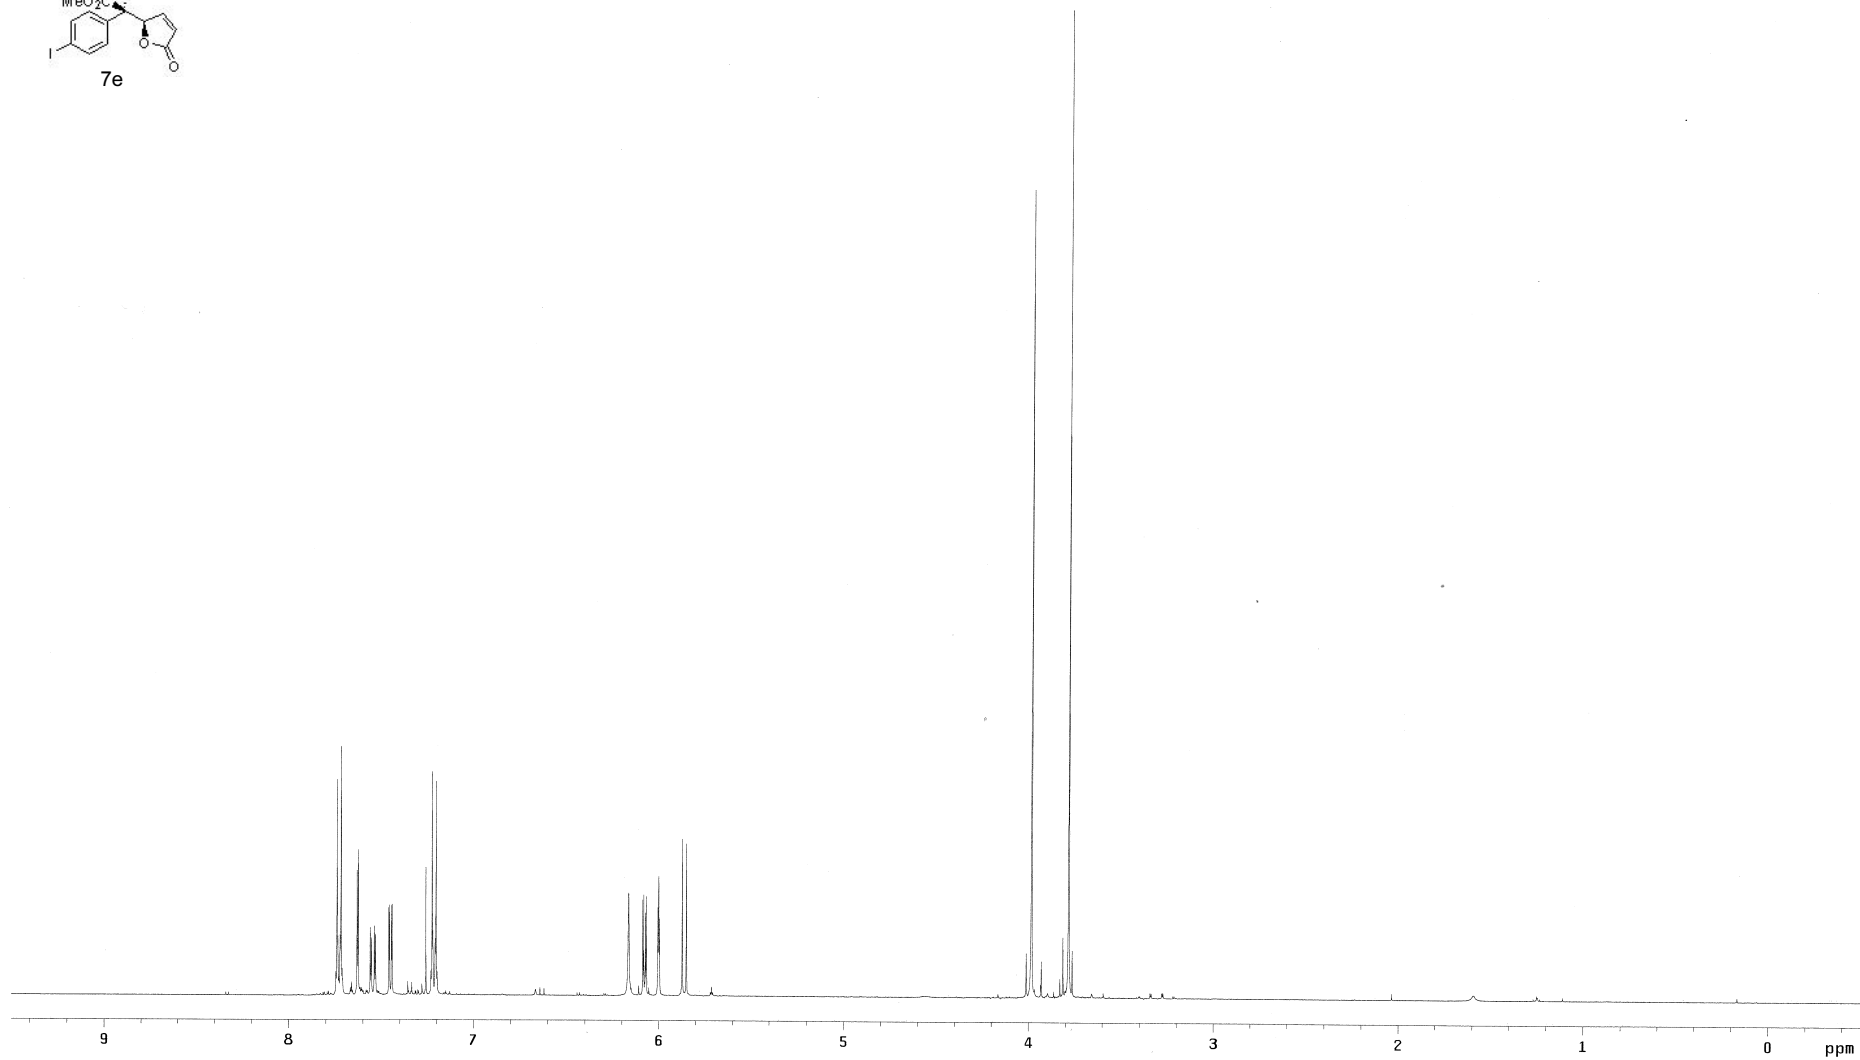



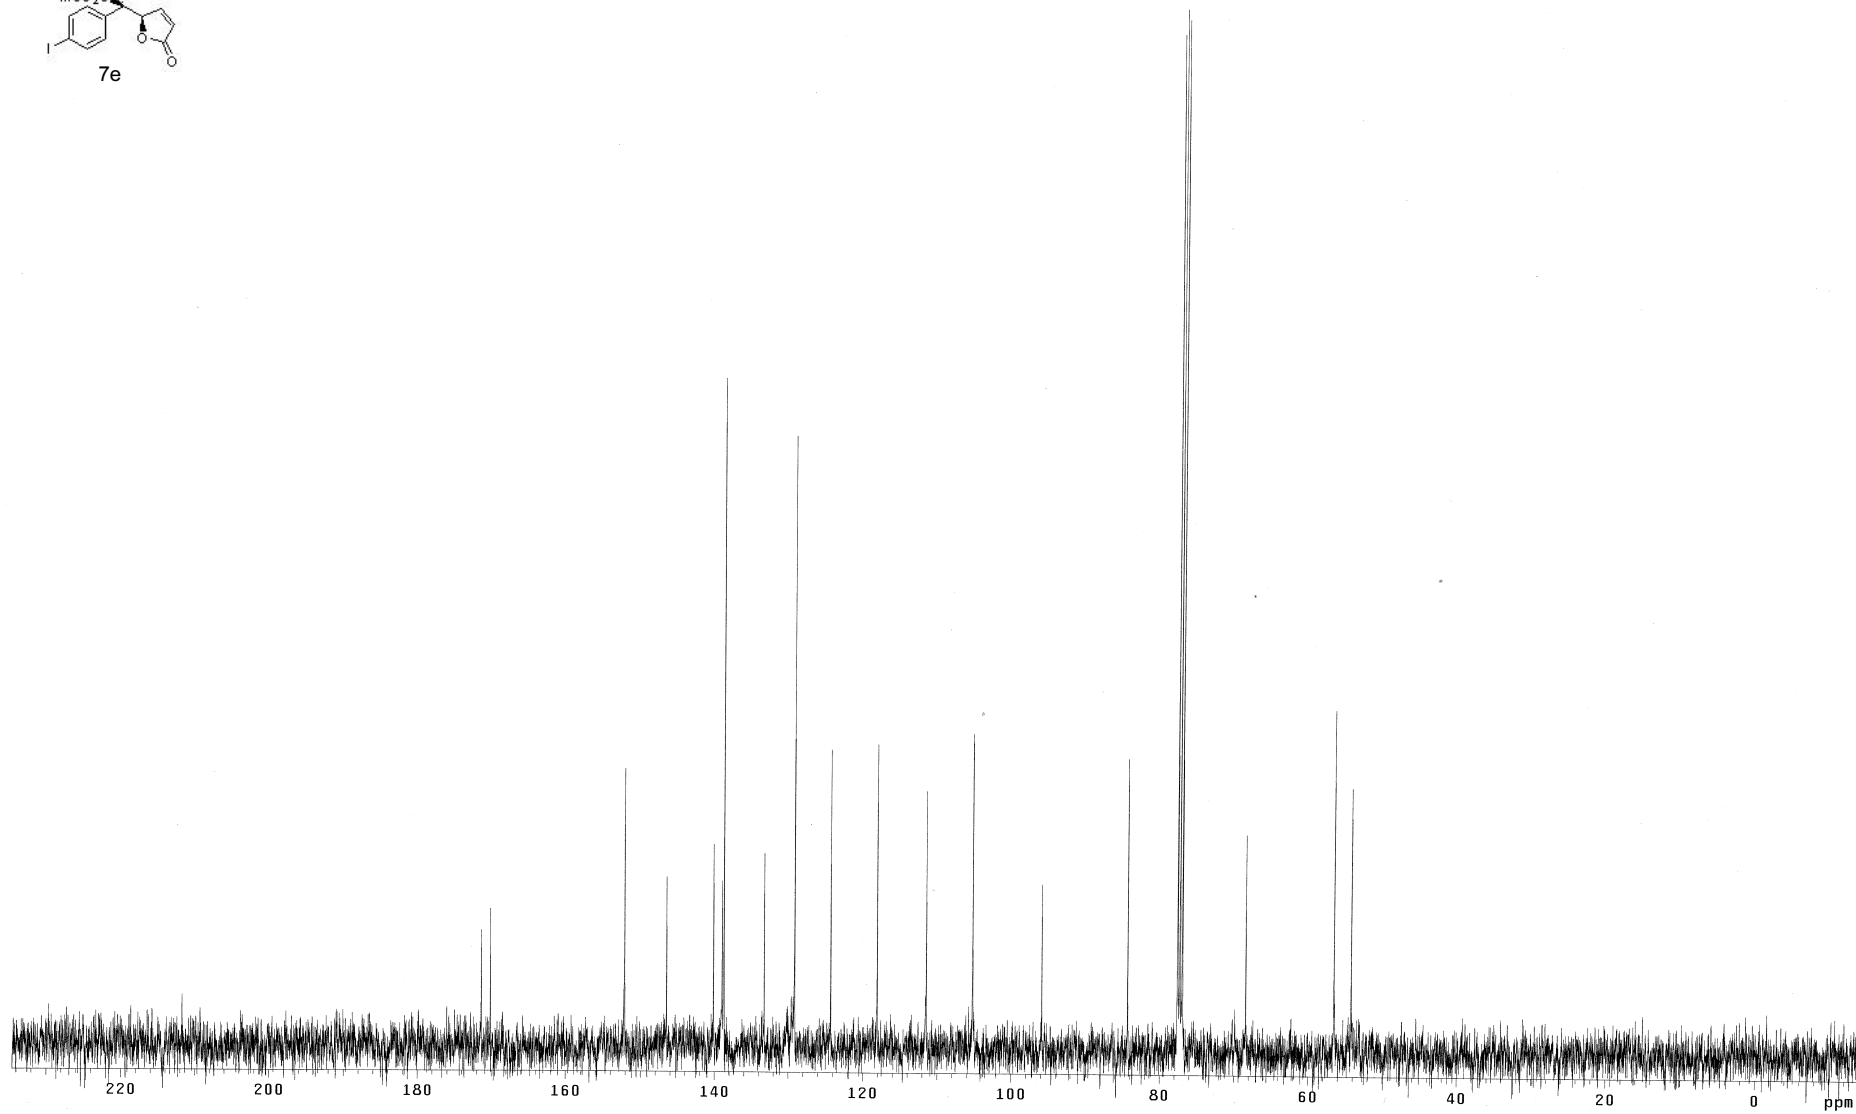

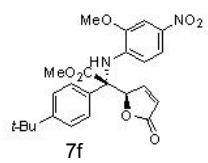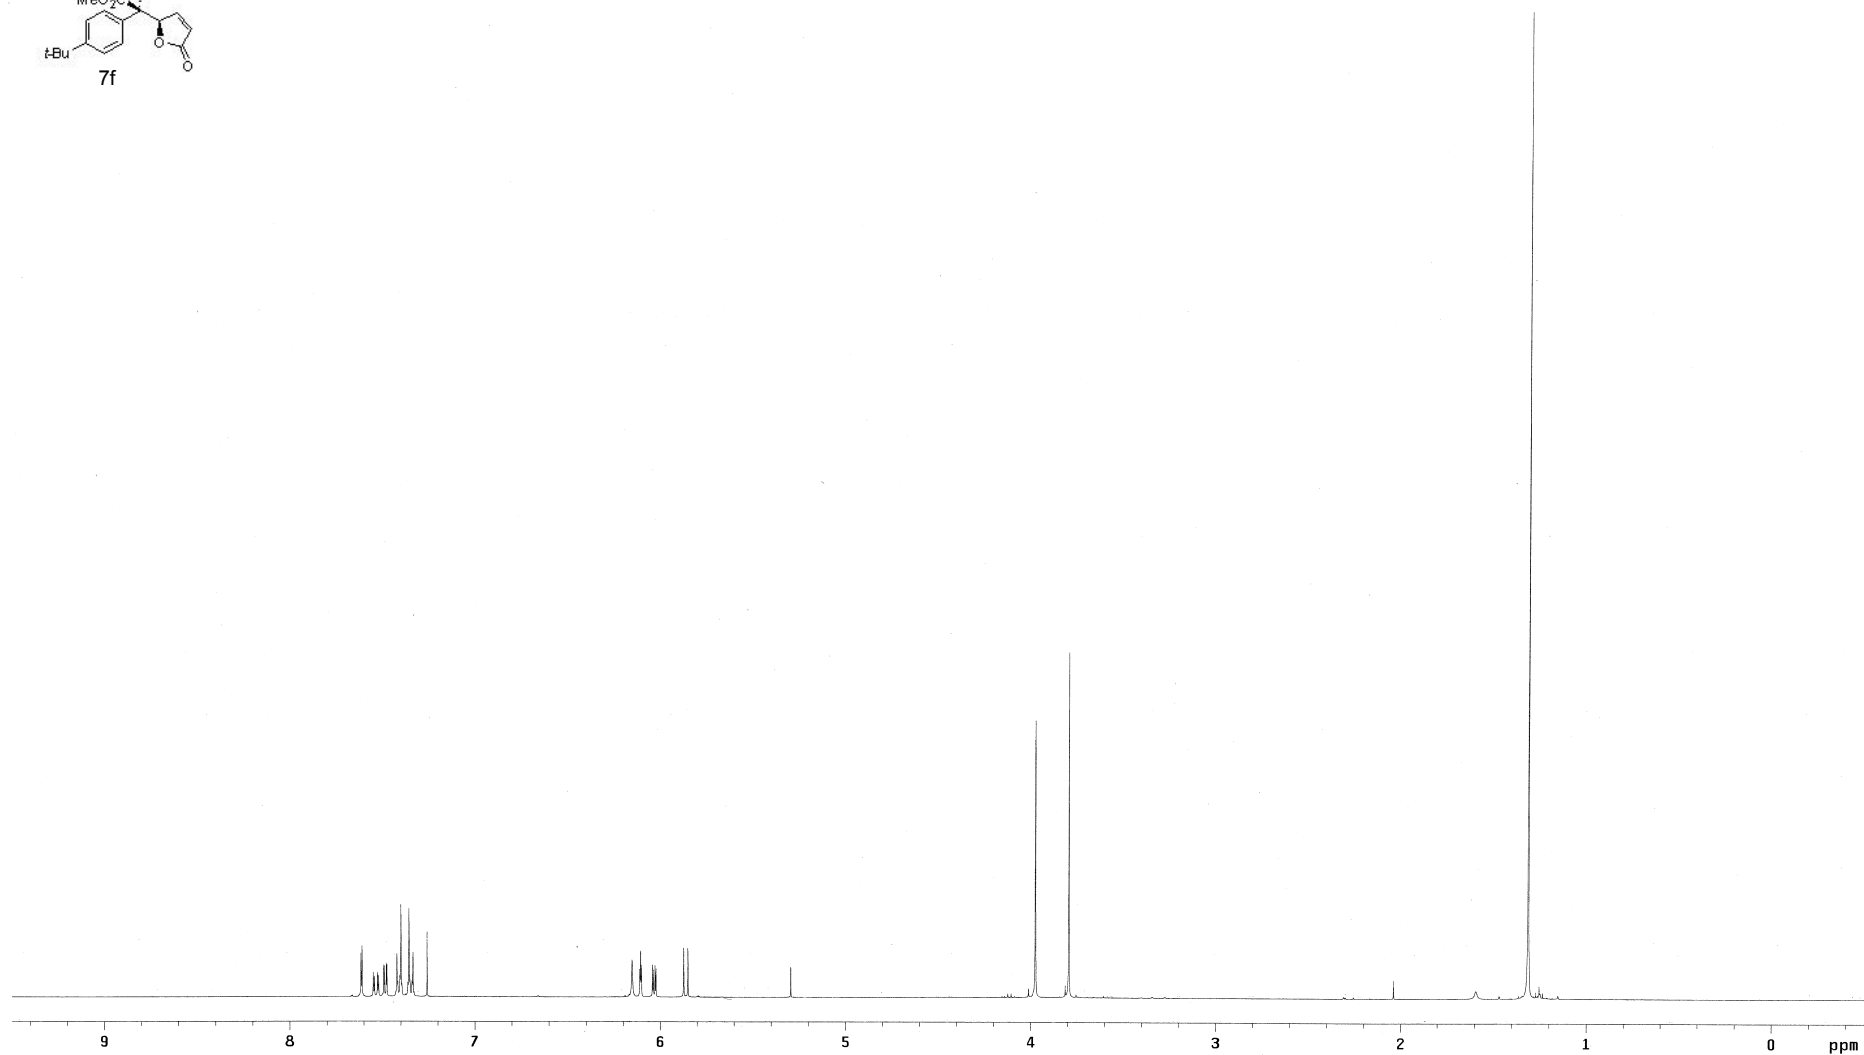

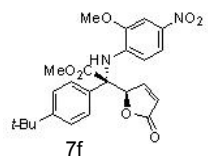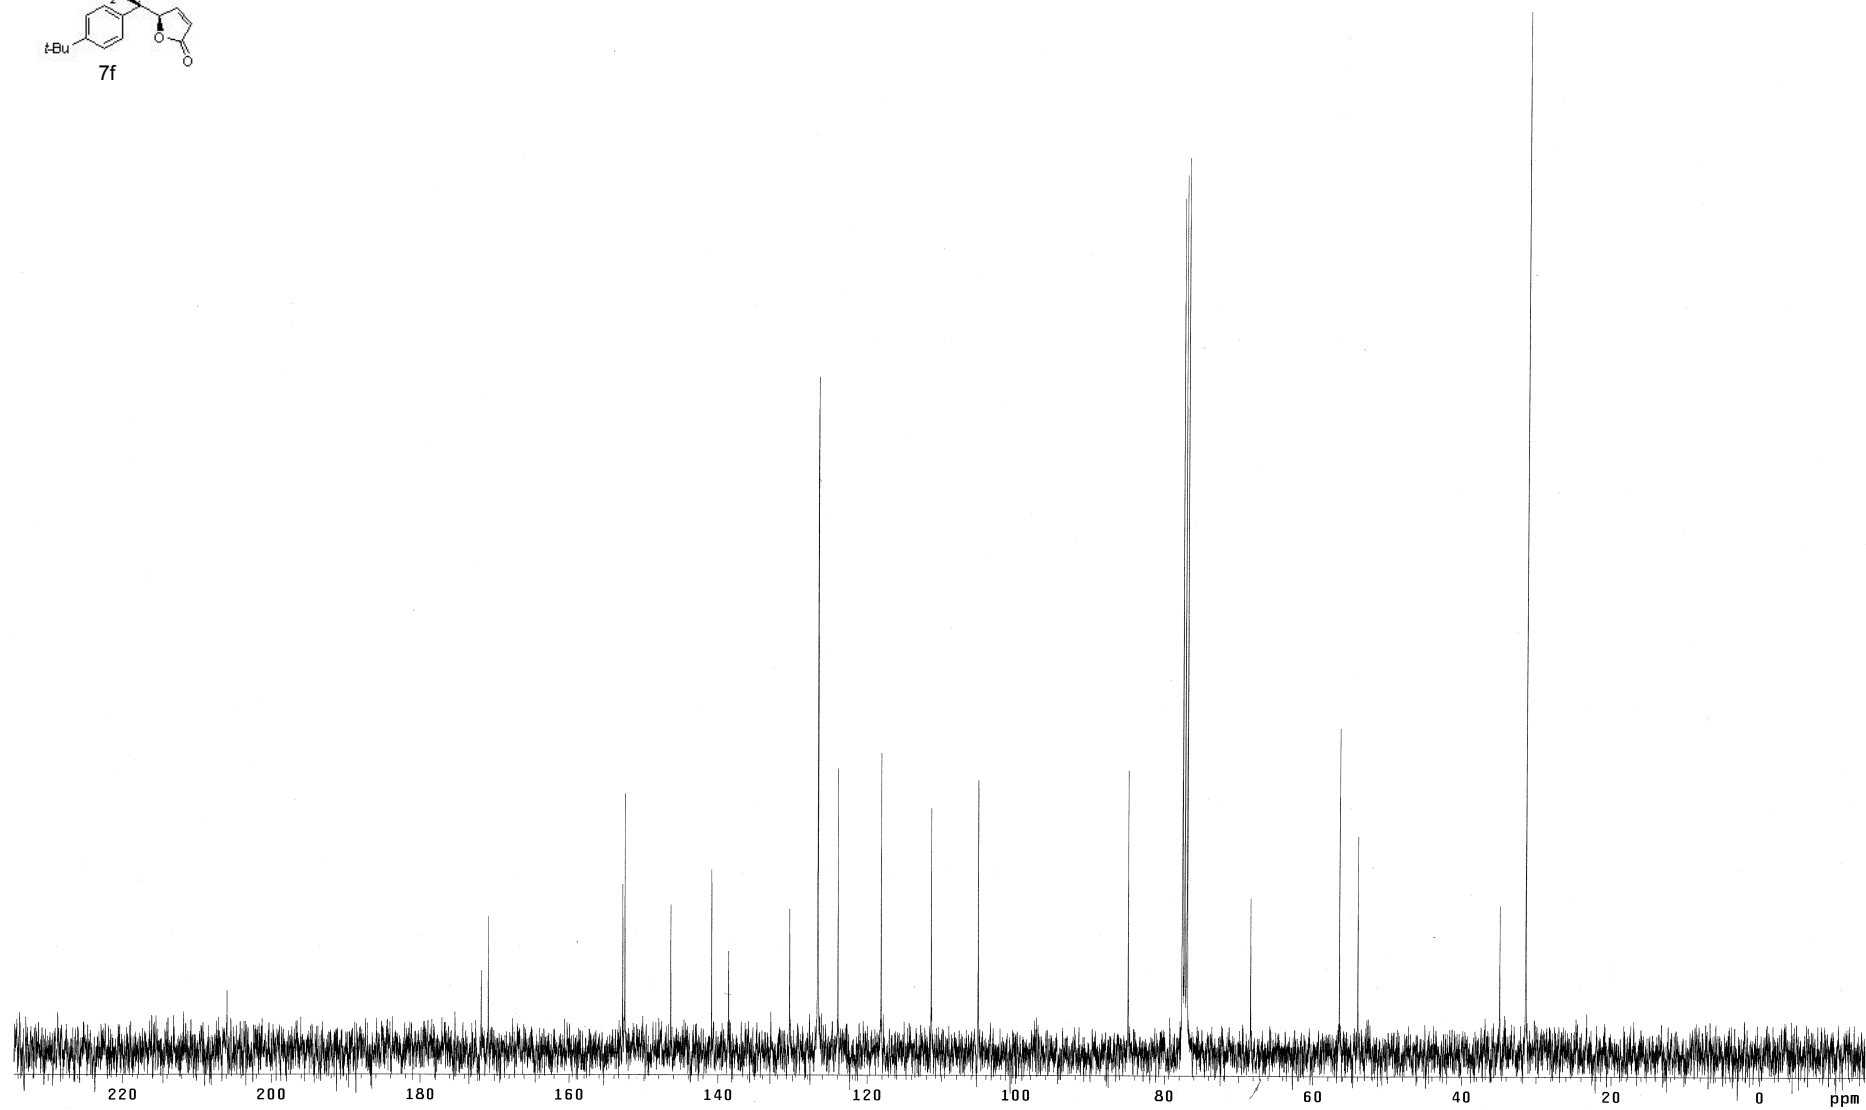

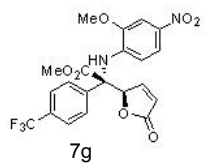

7g

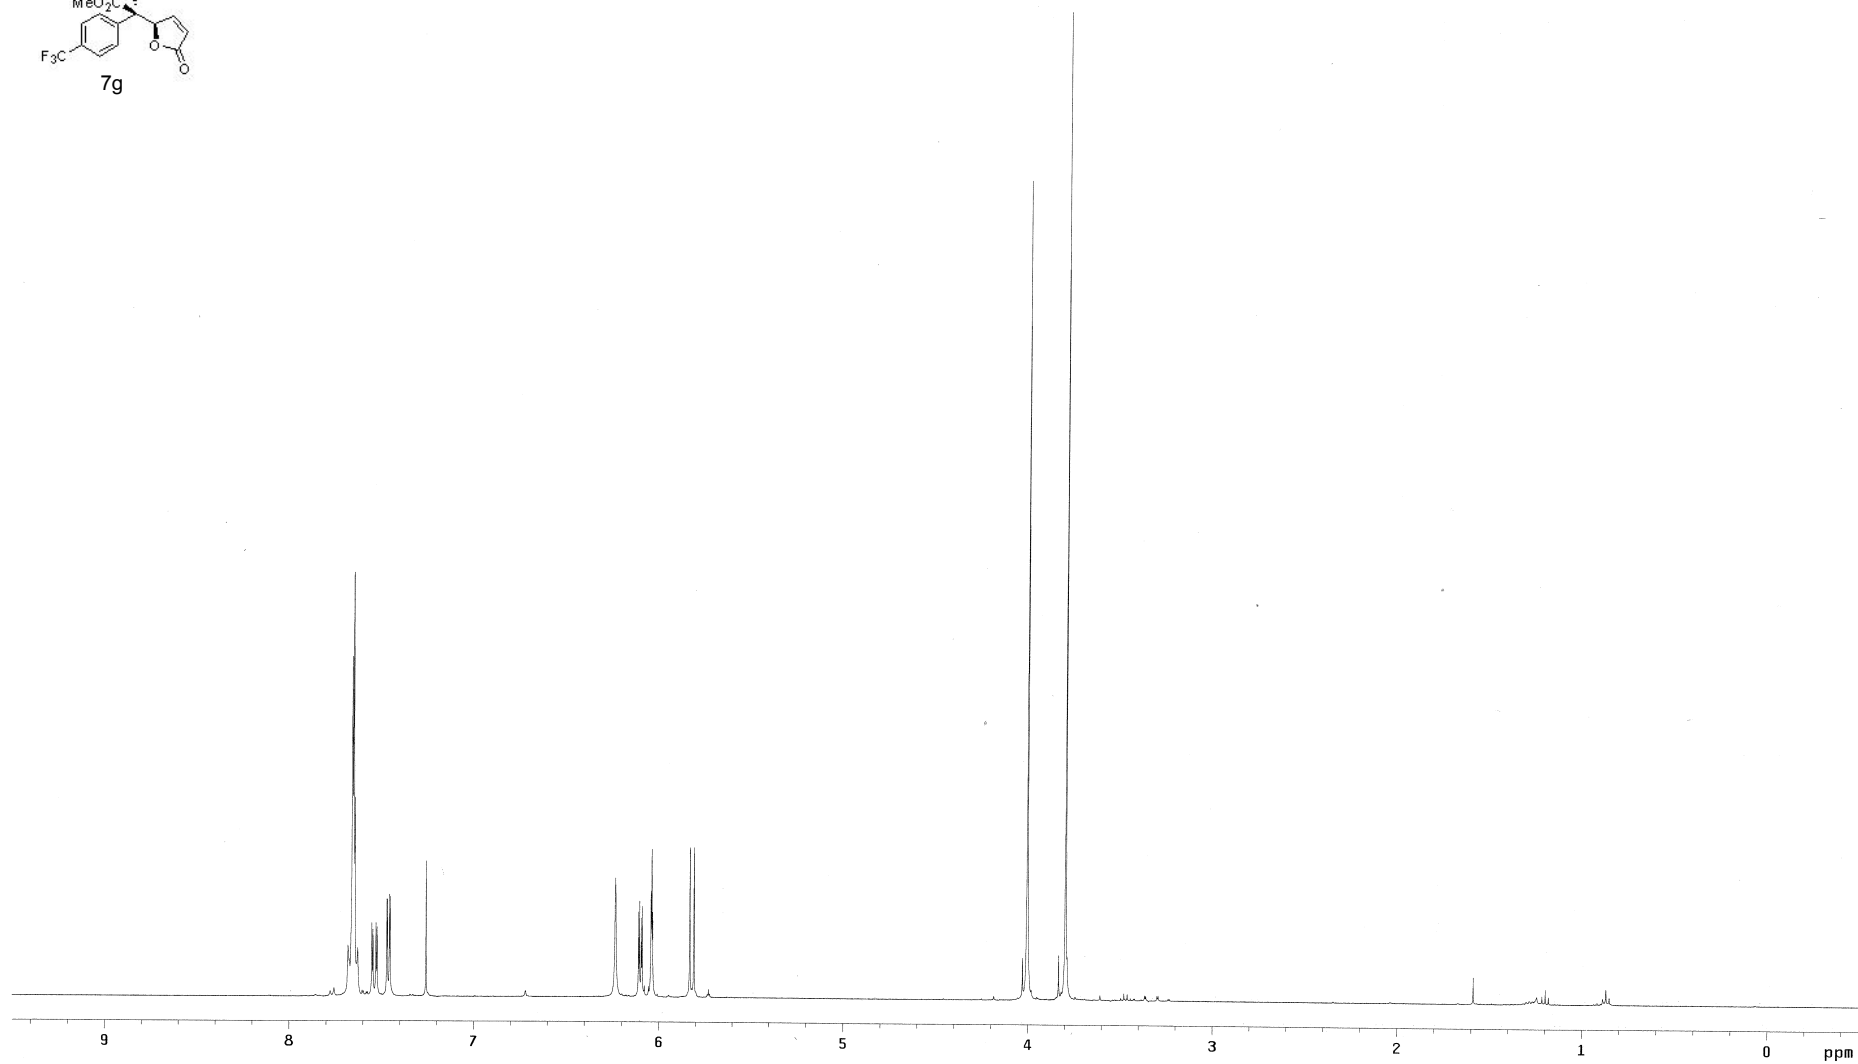

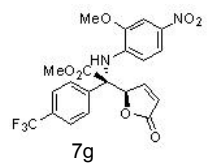

7g

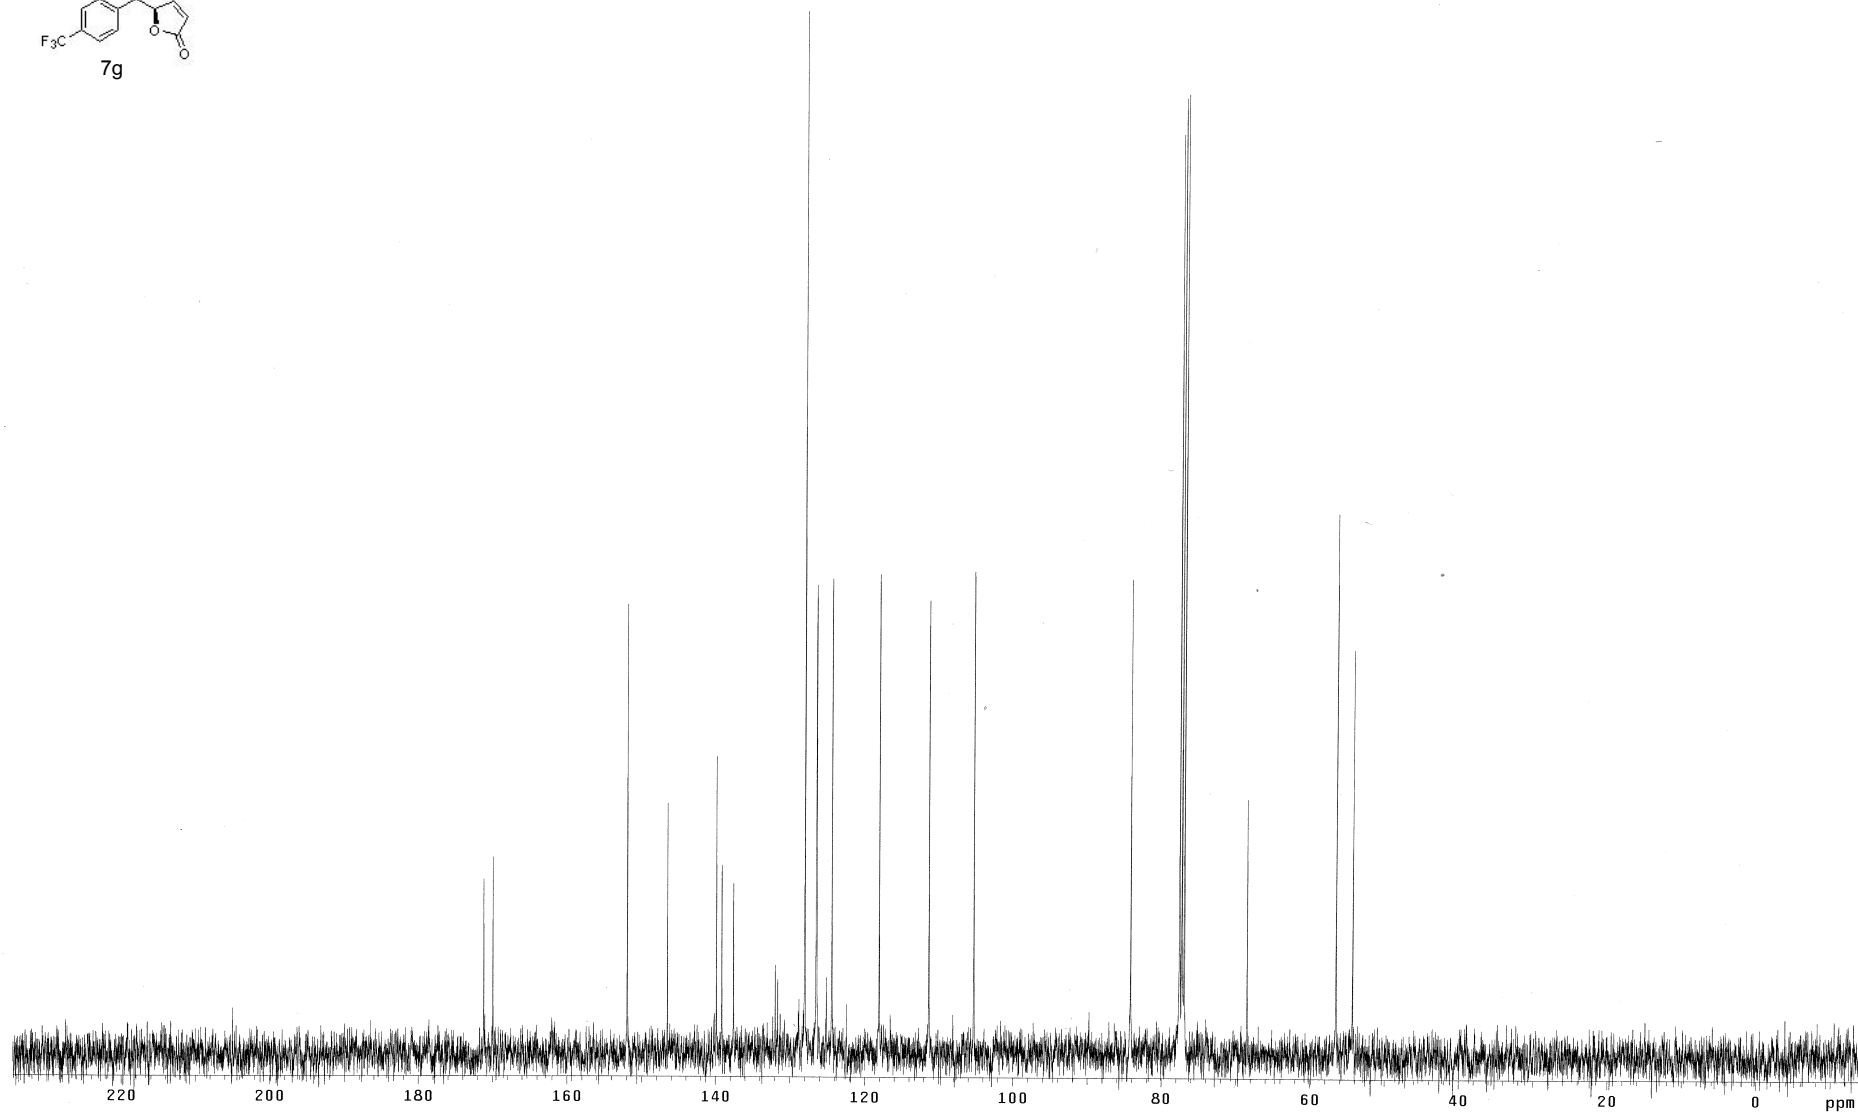

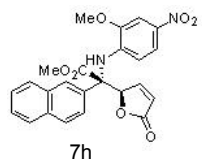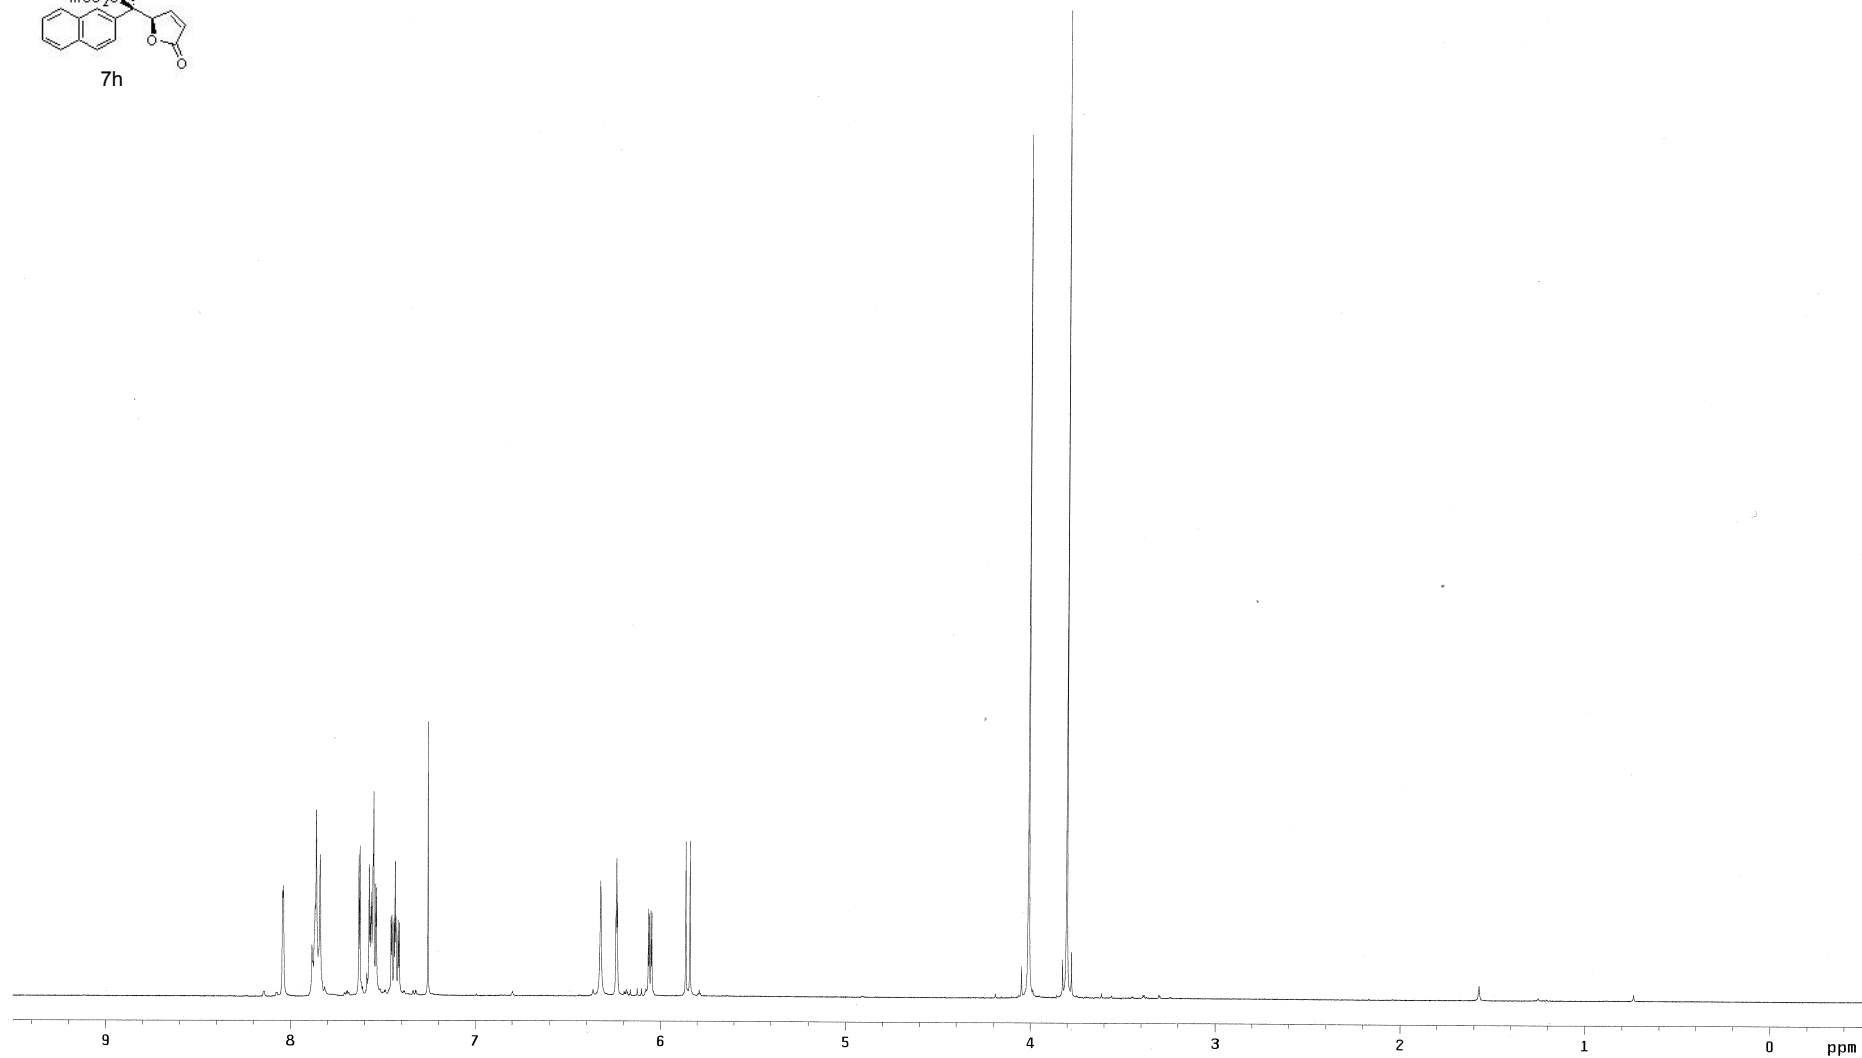

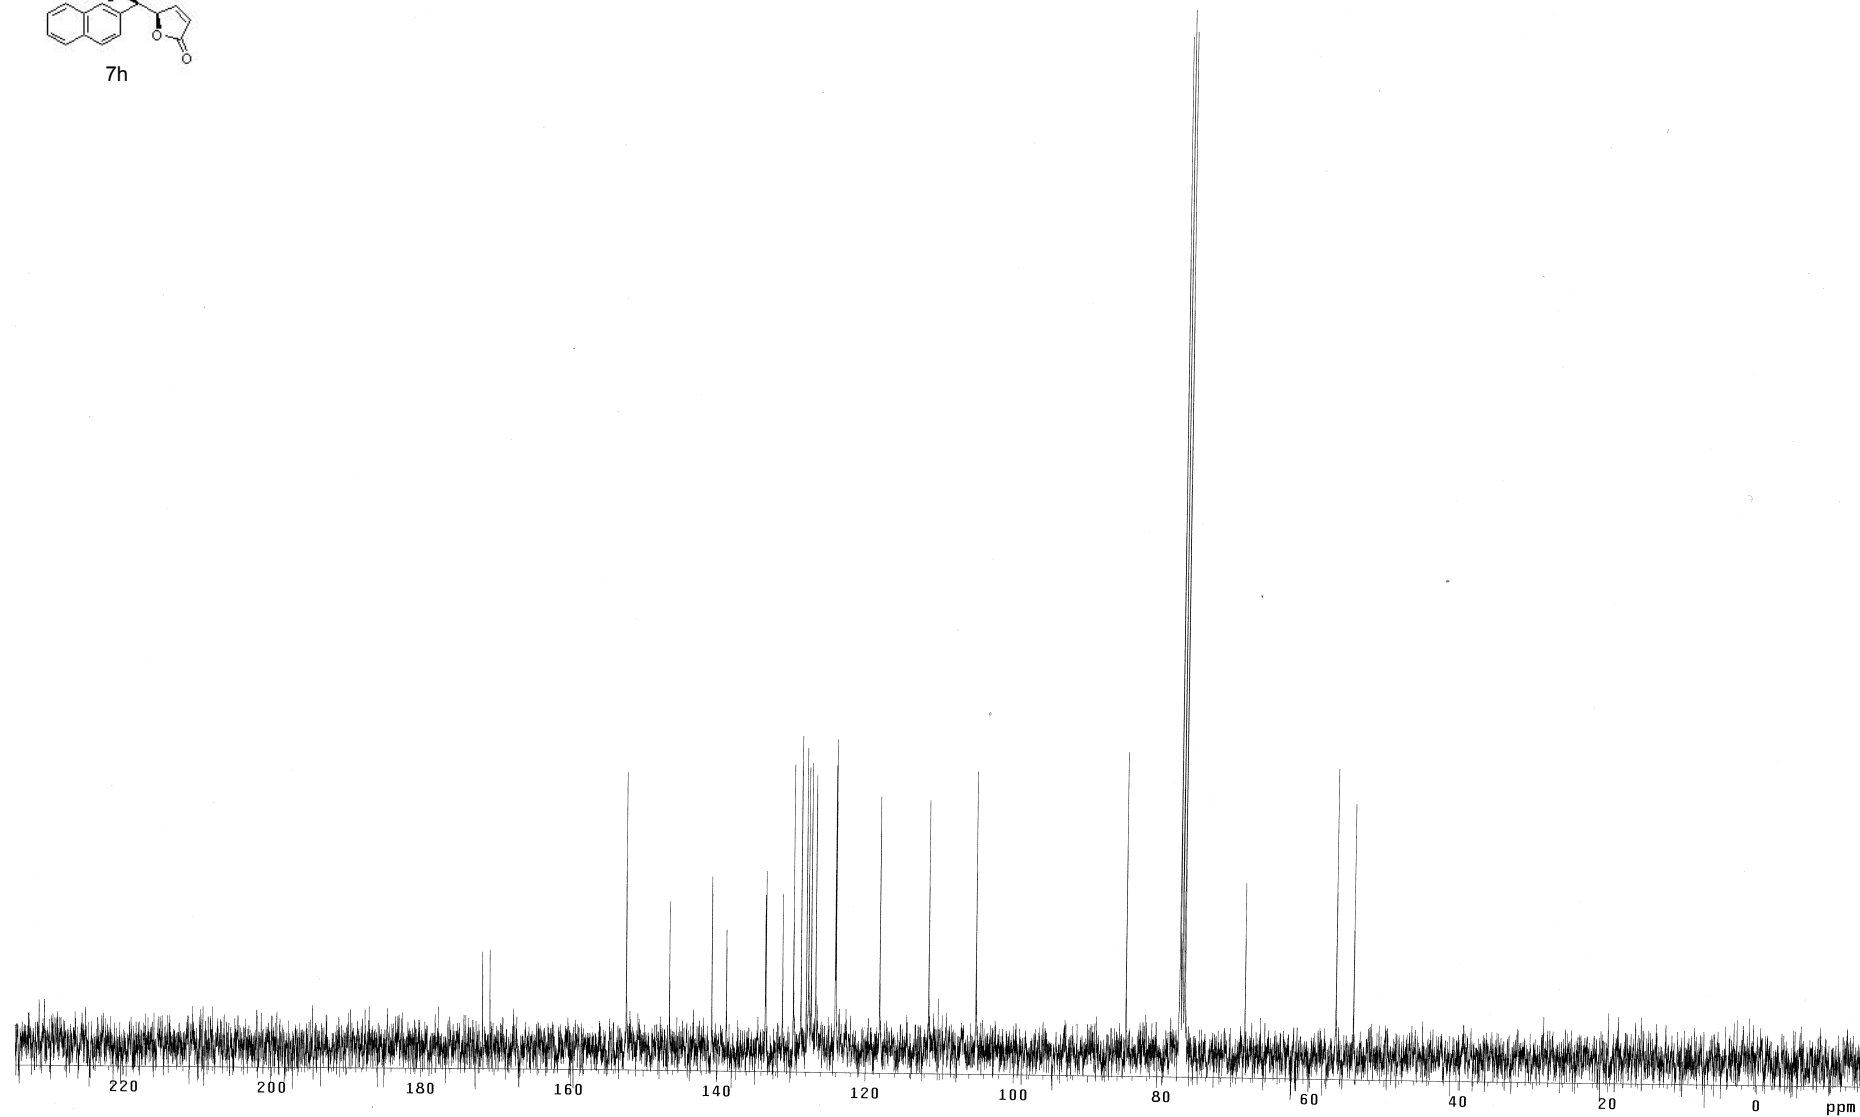

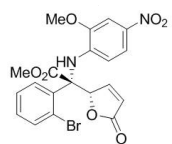

8i

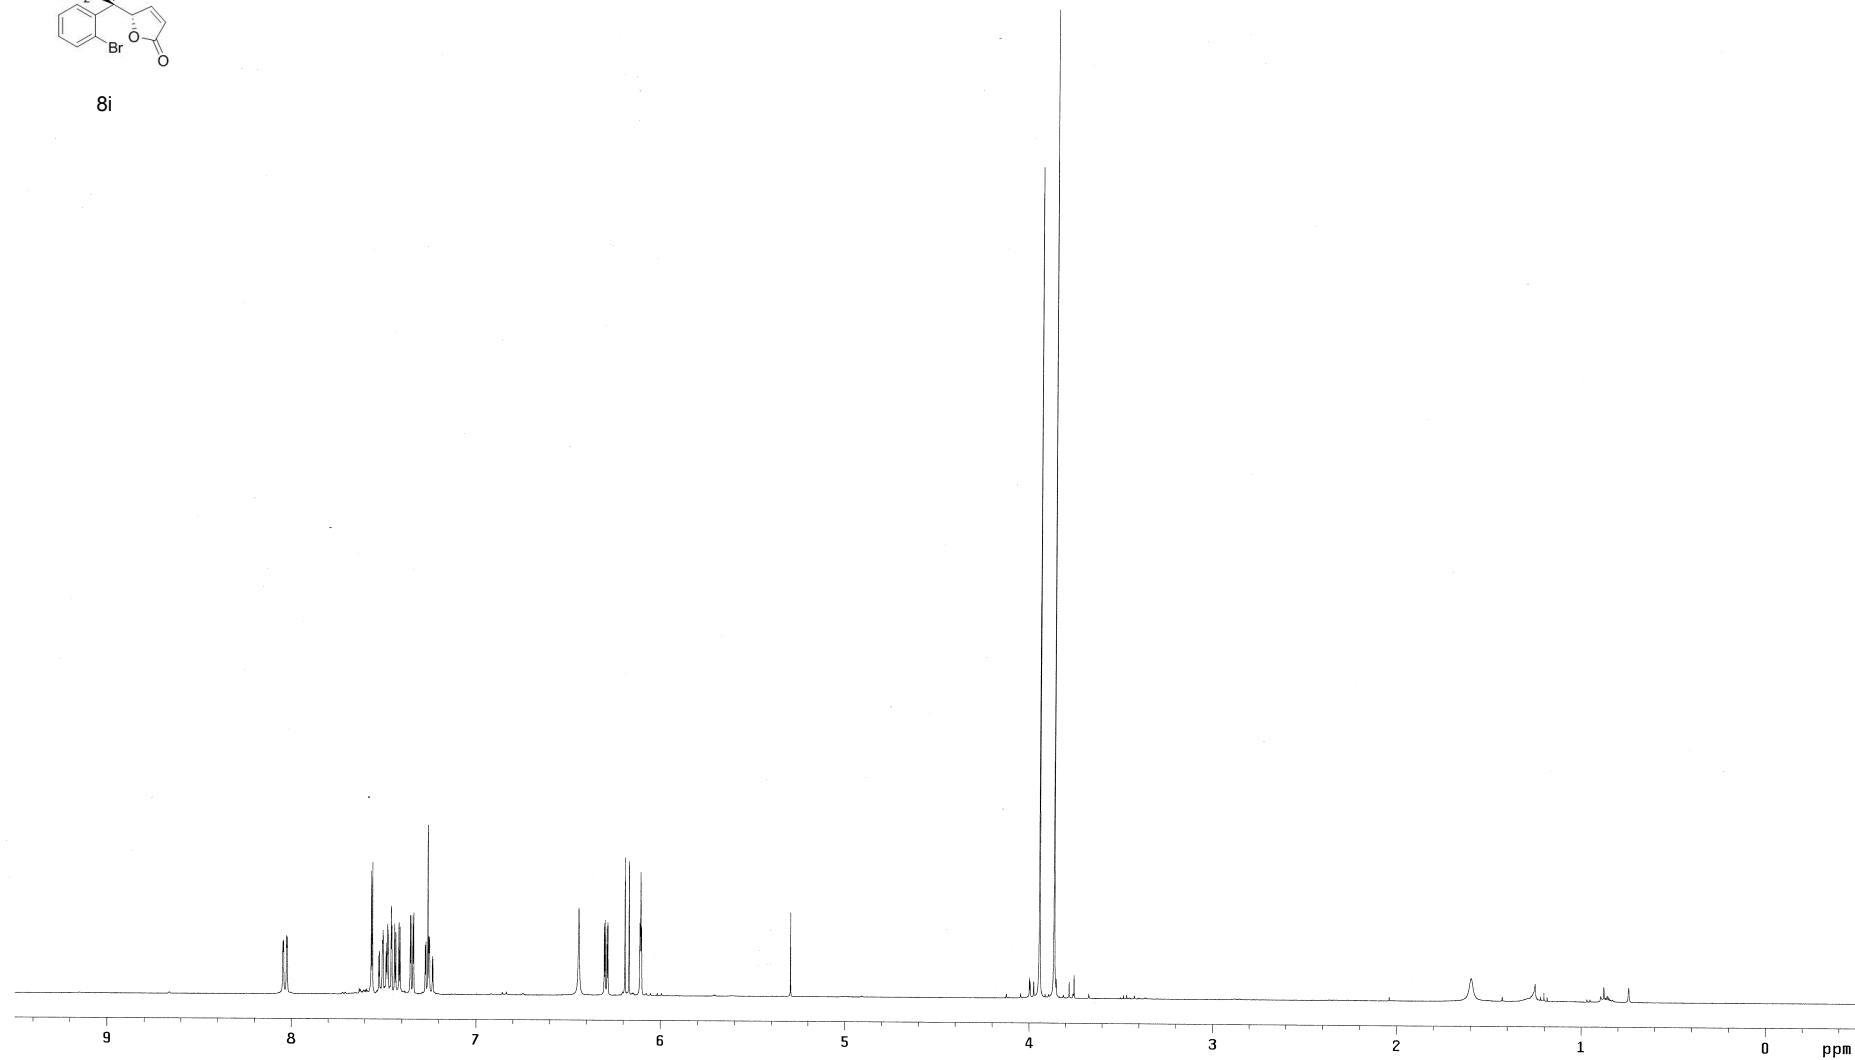



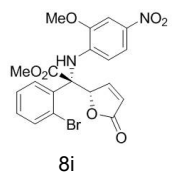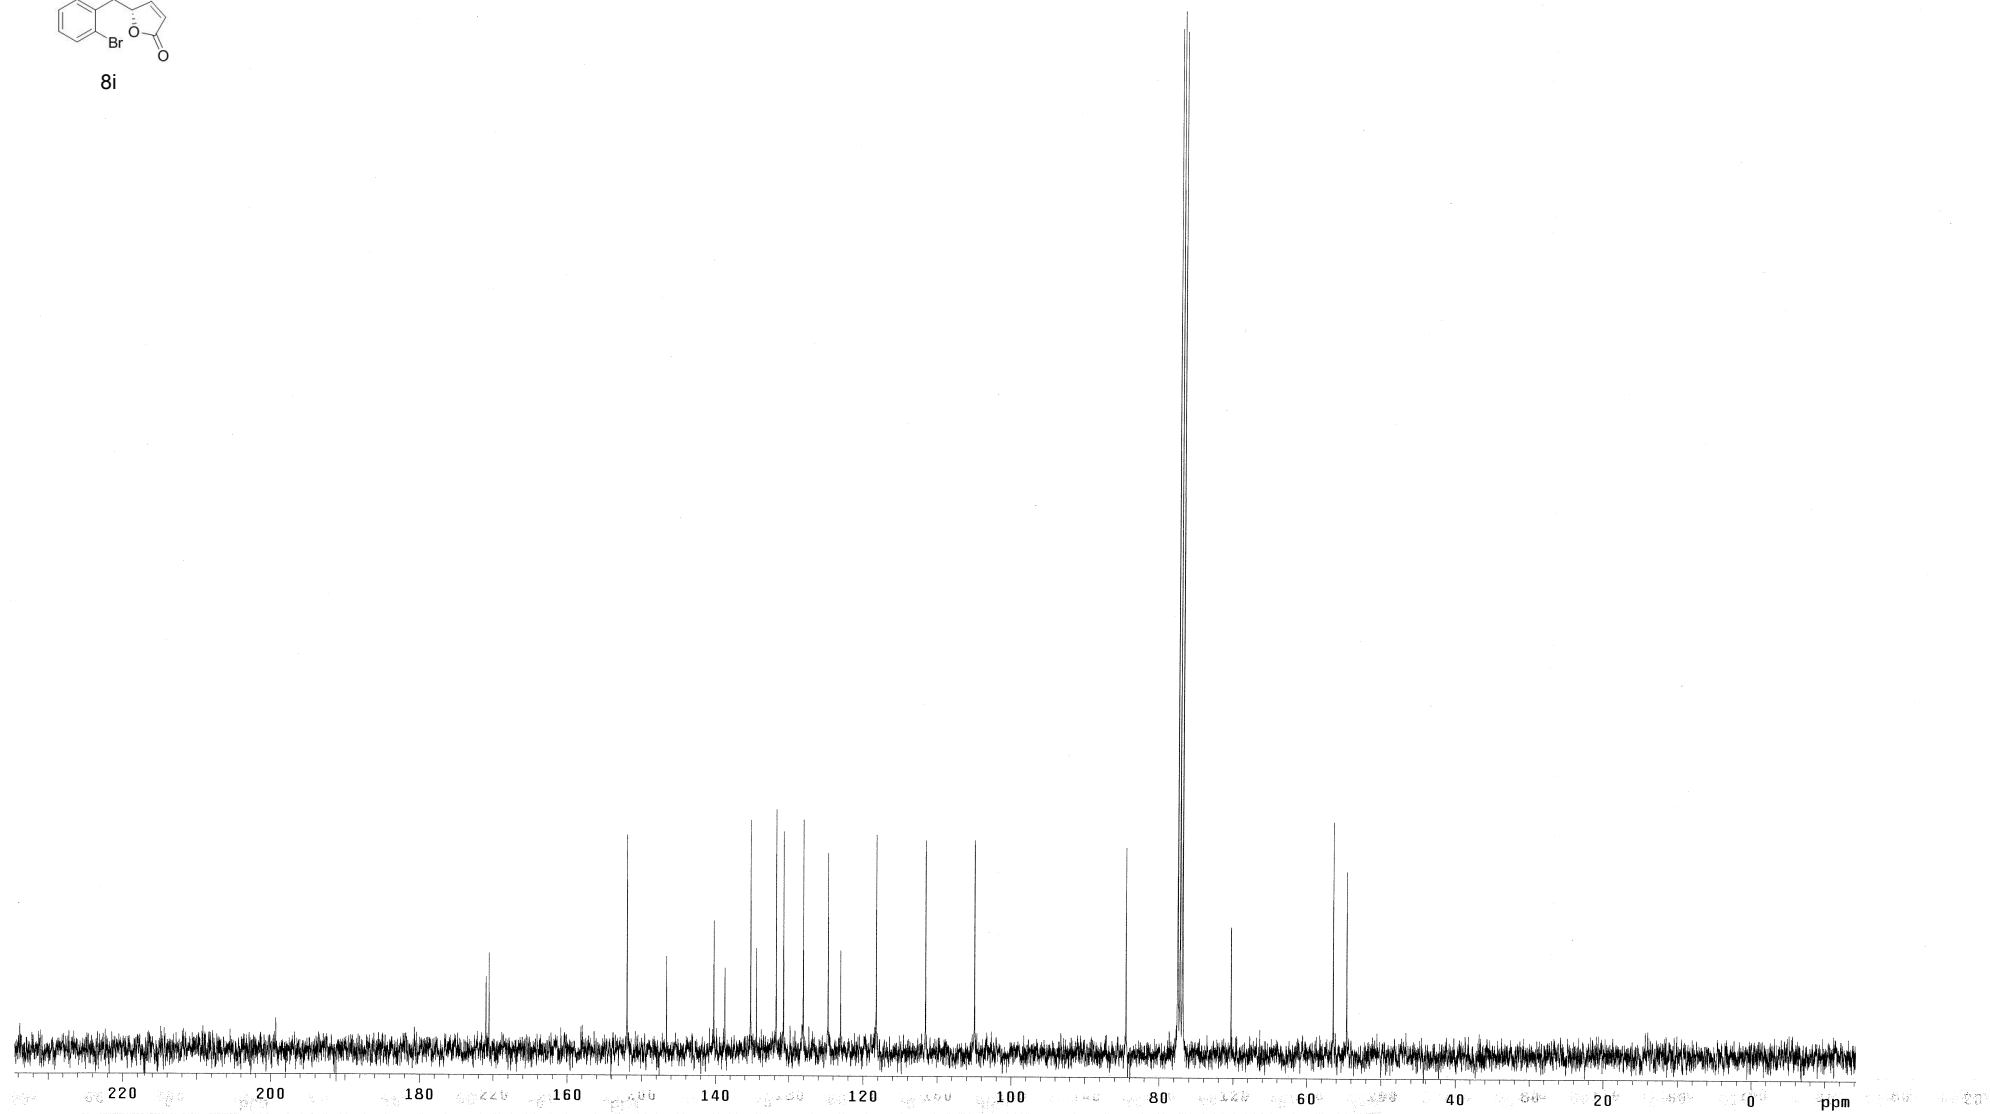

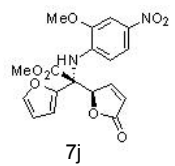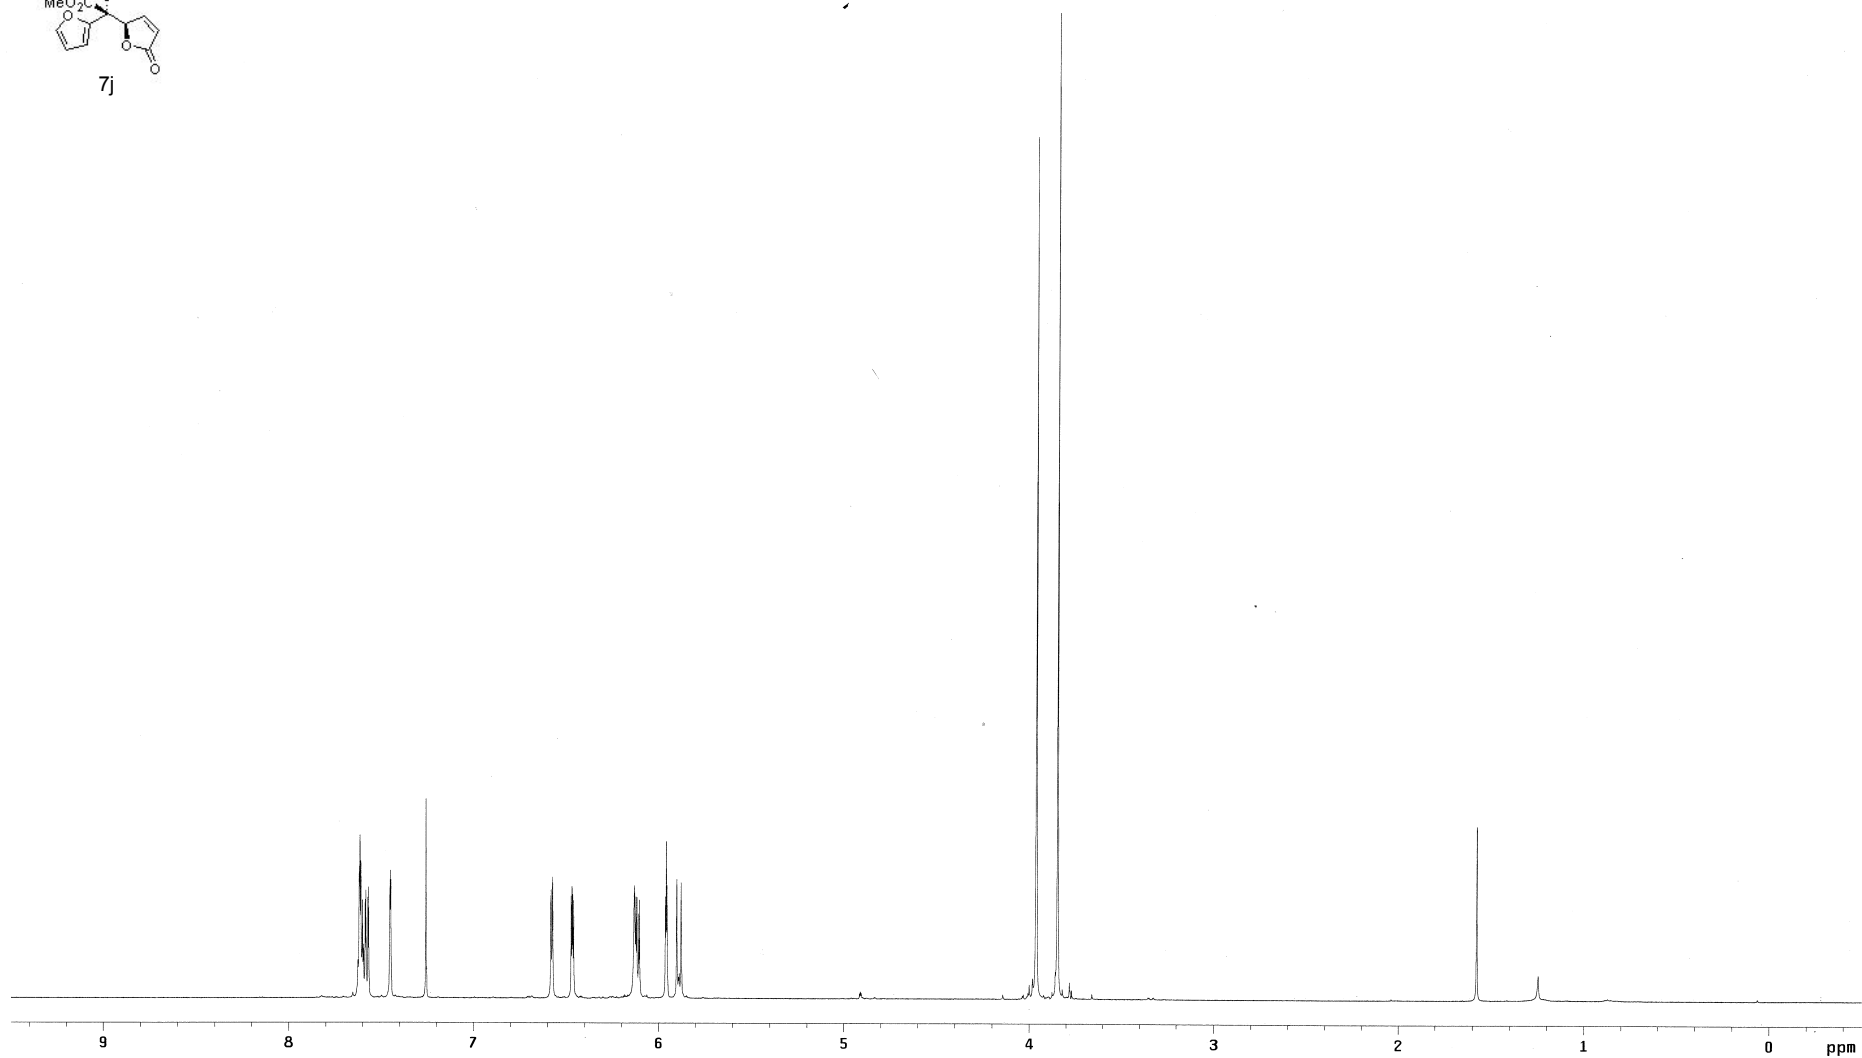

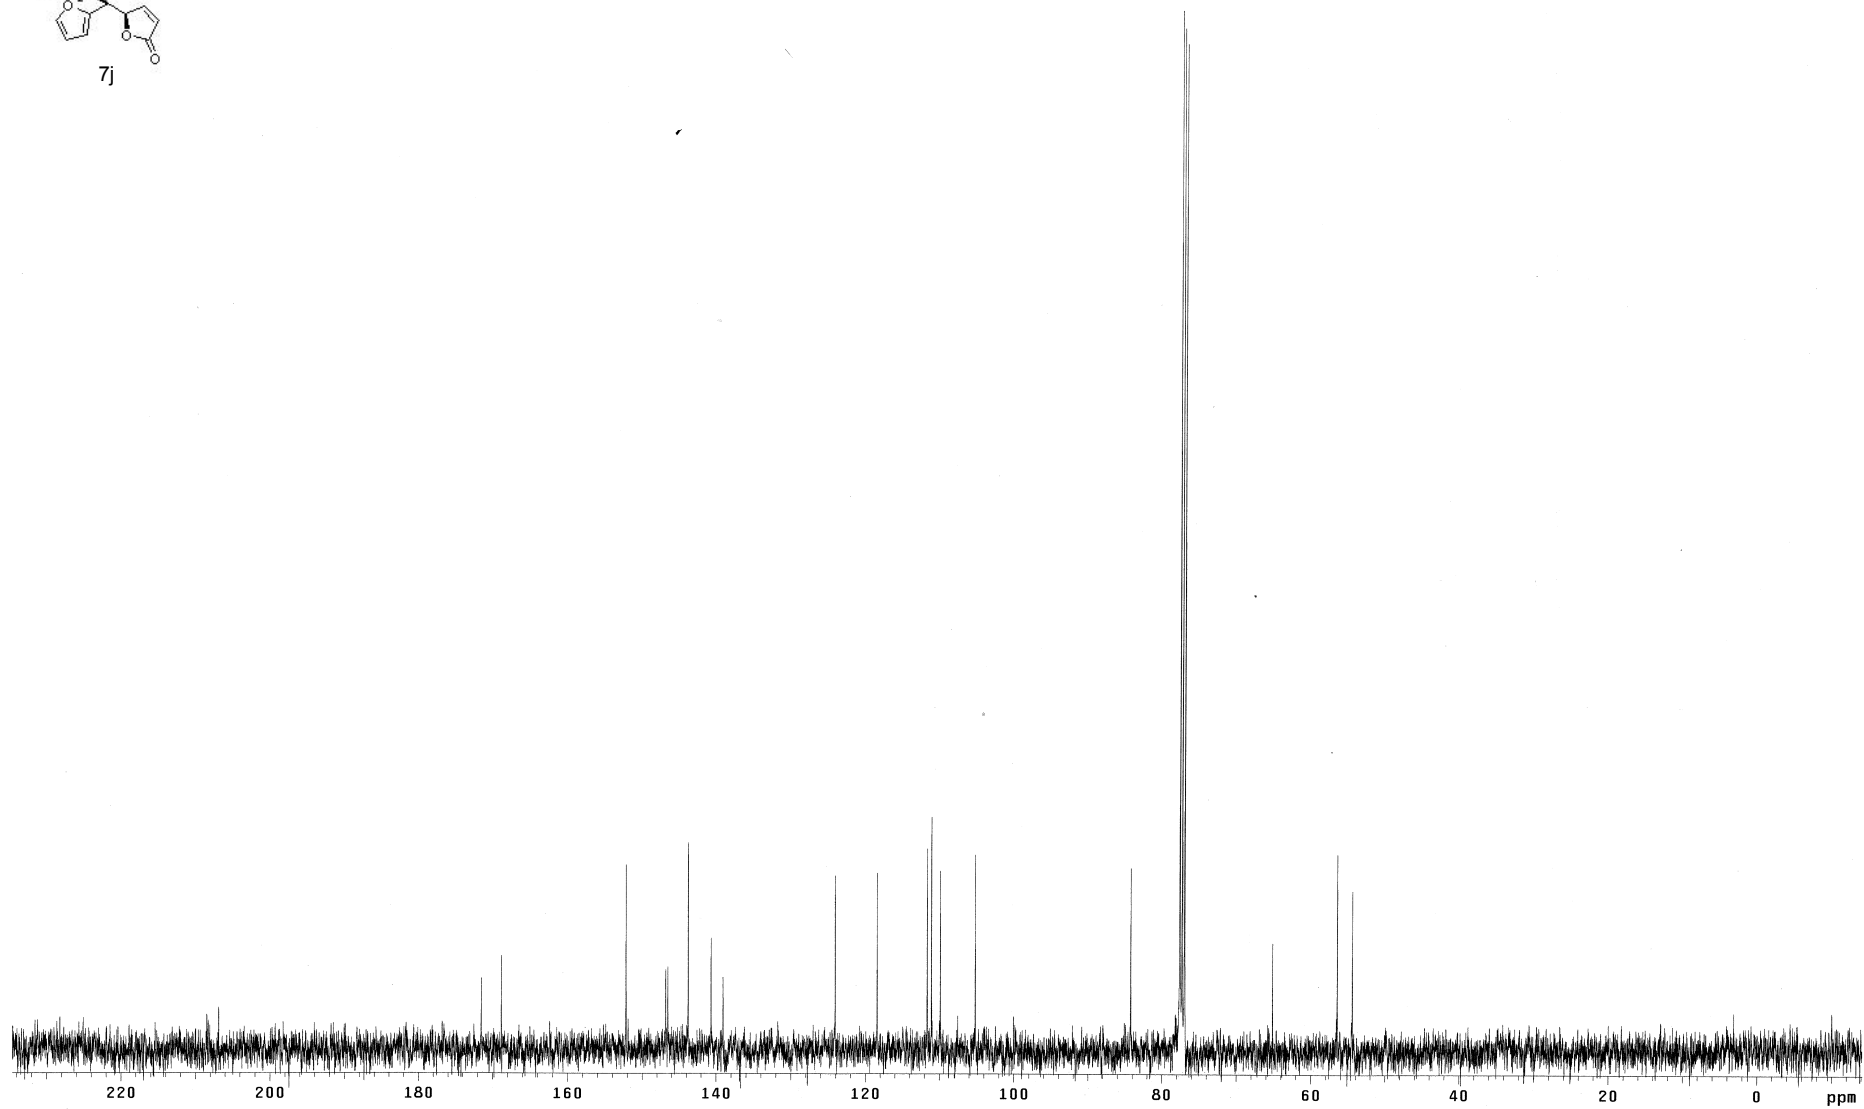

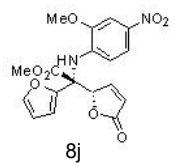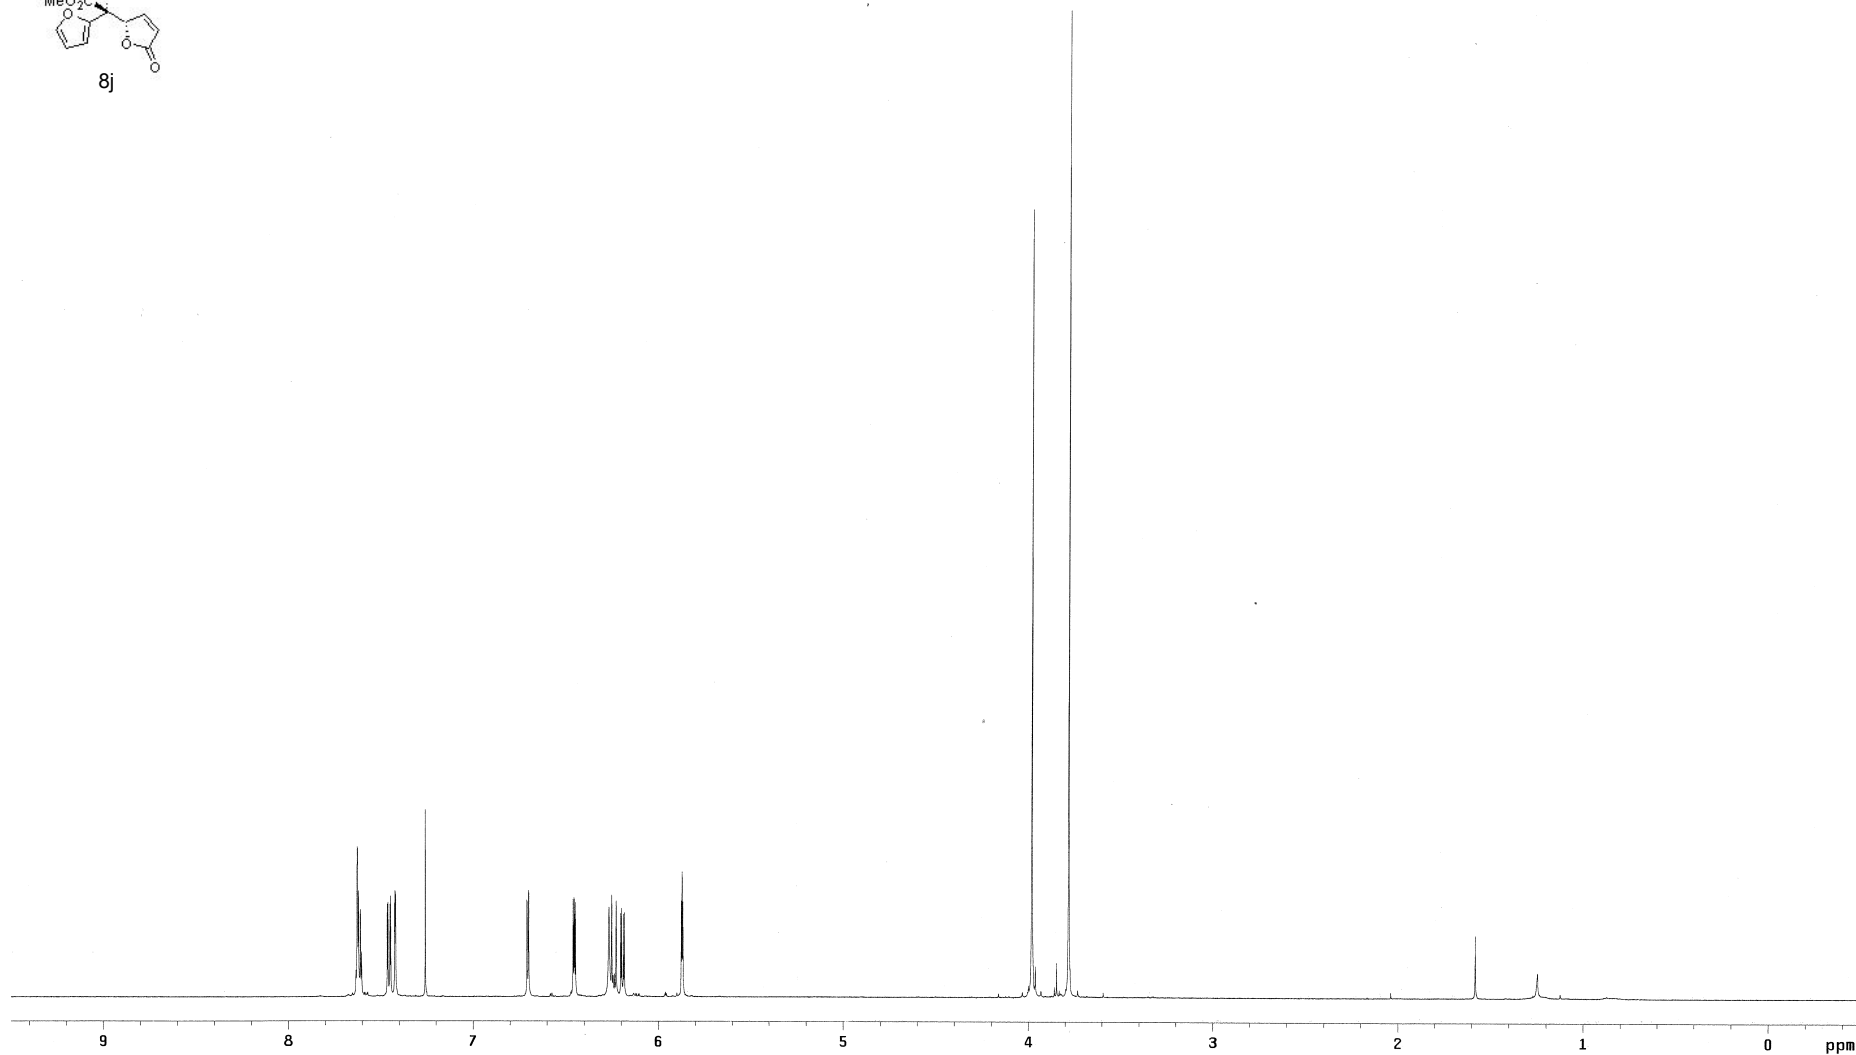

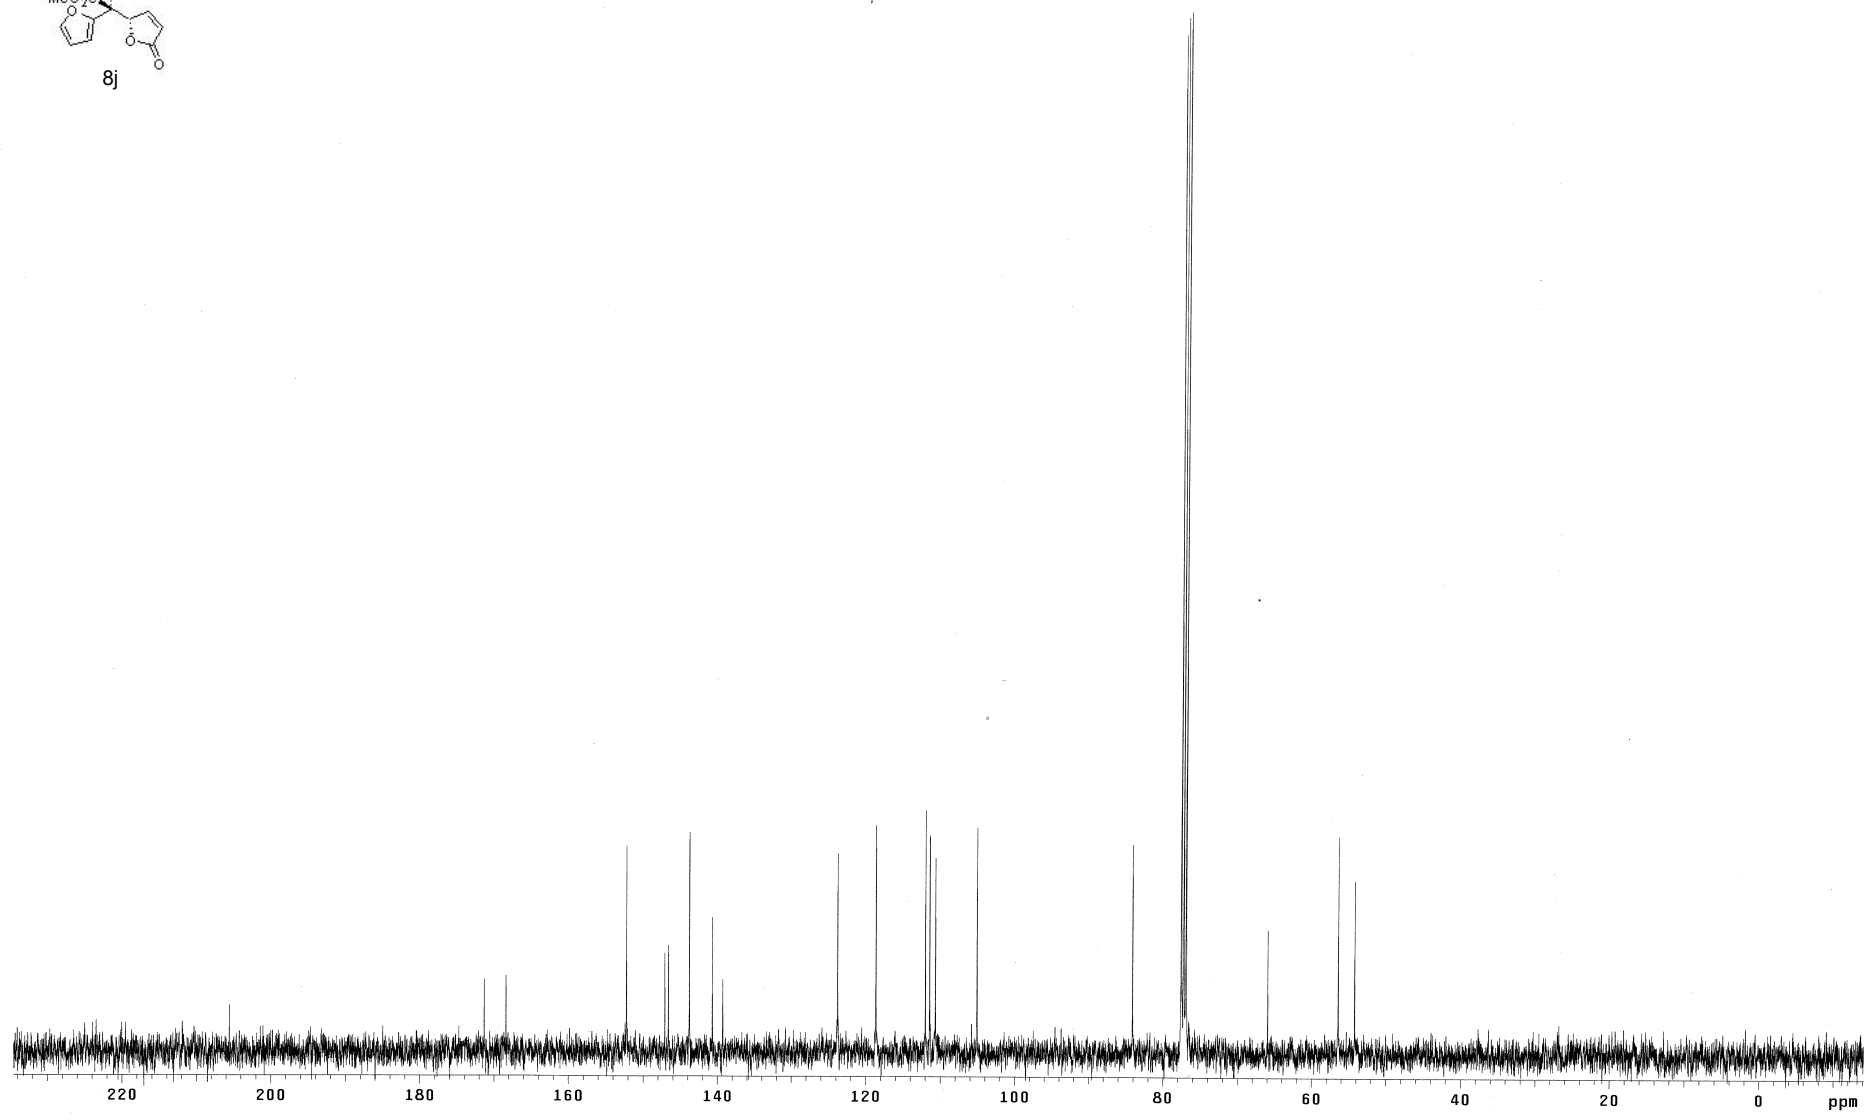

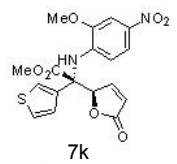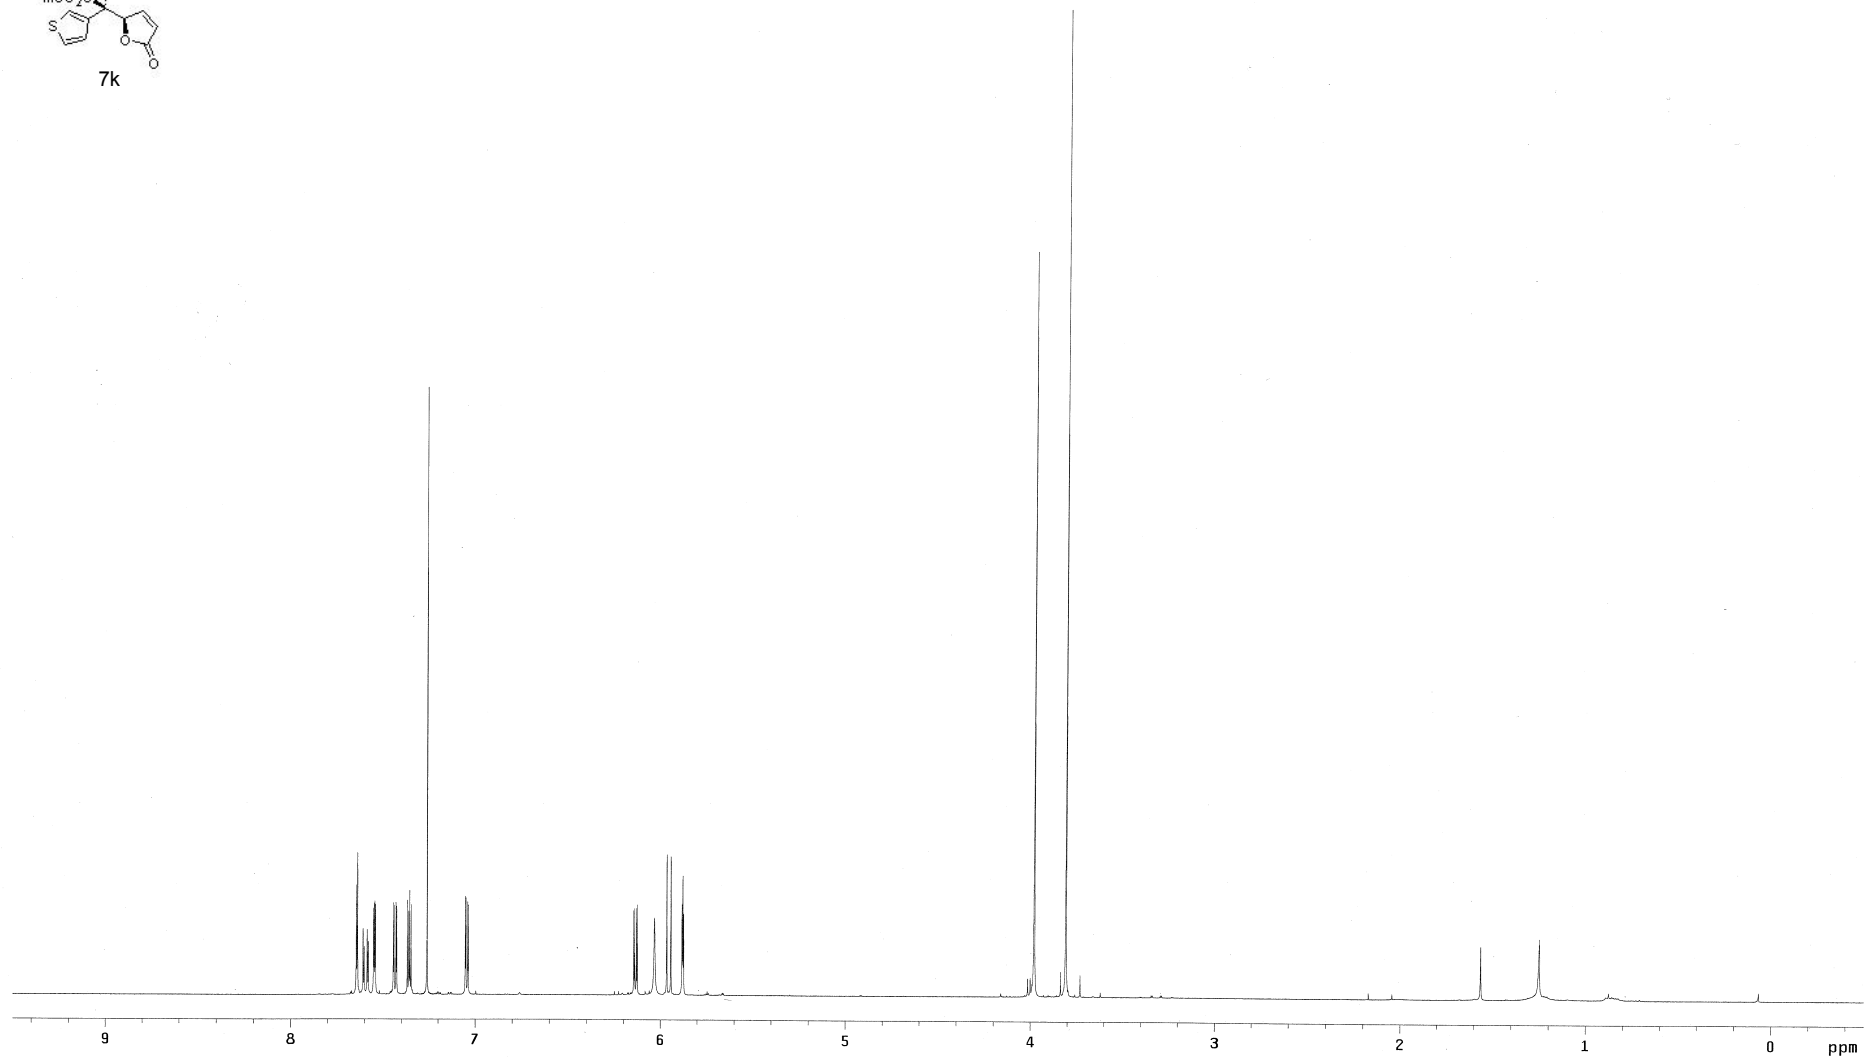

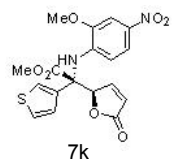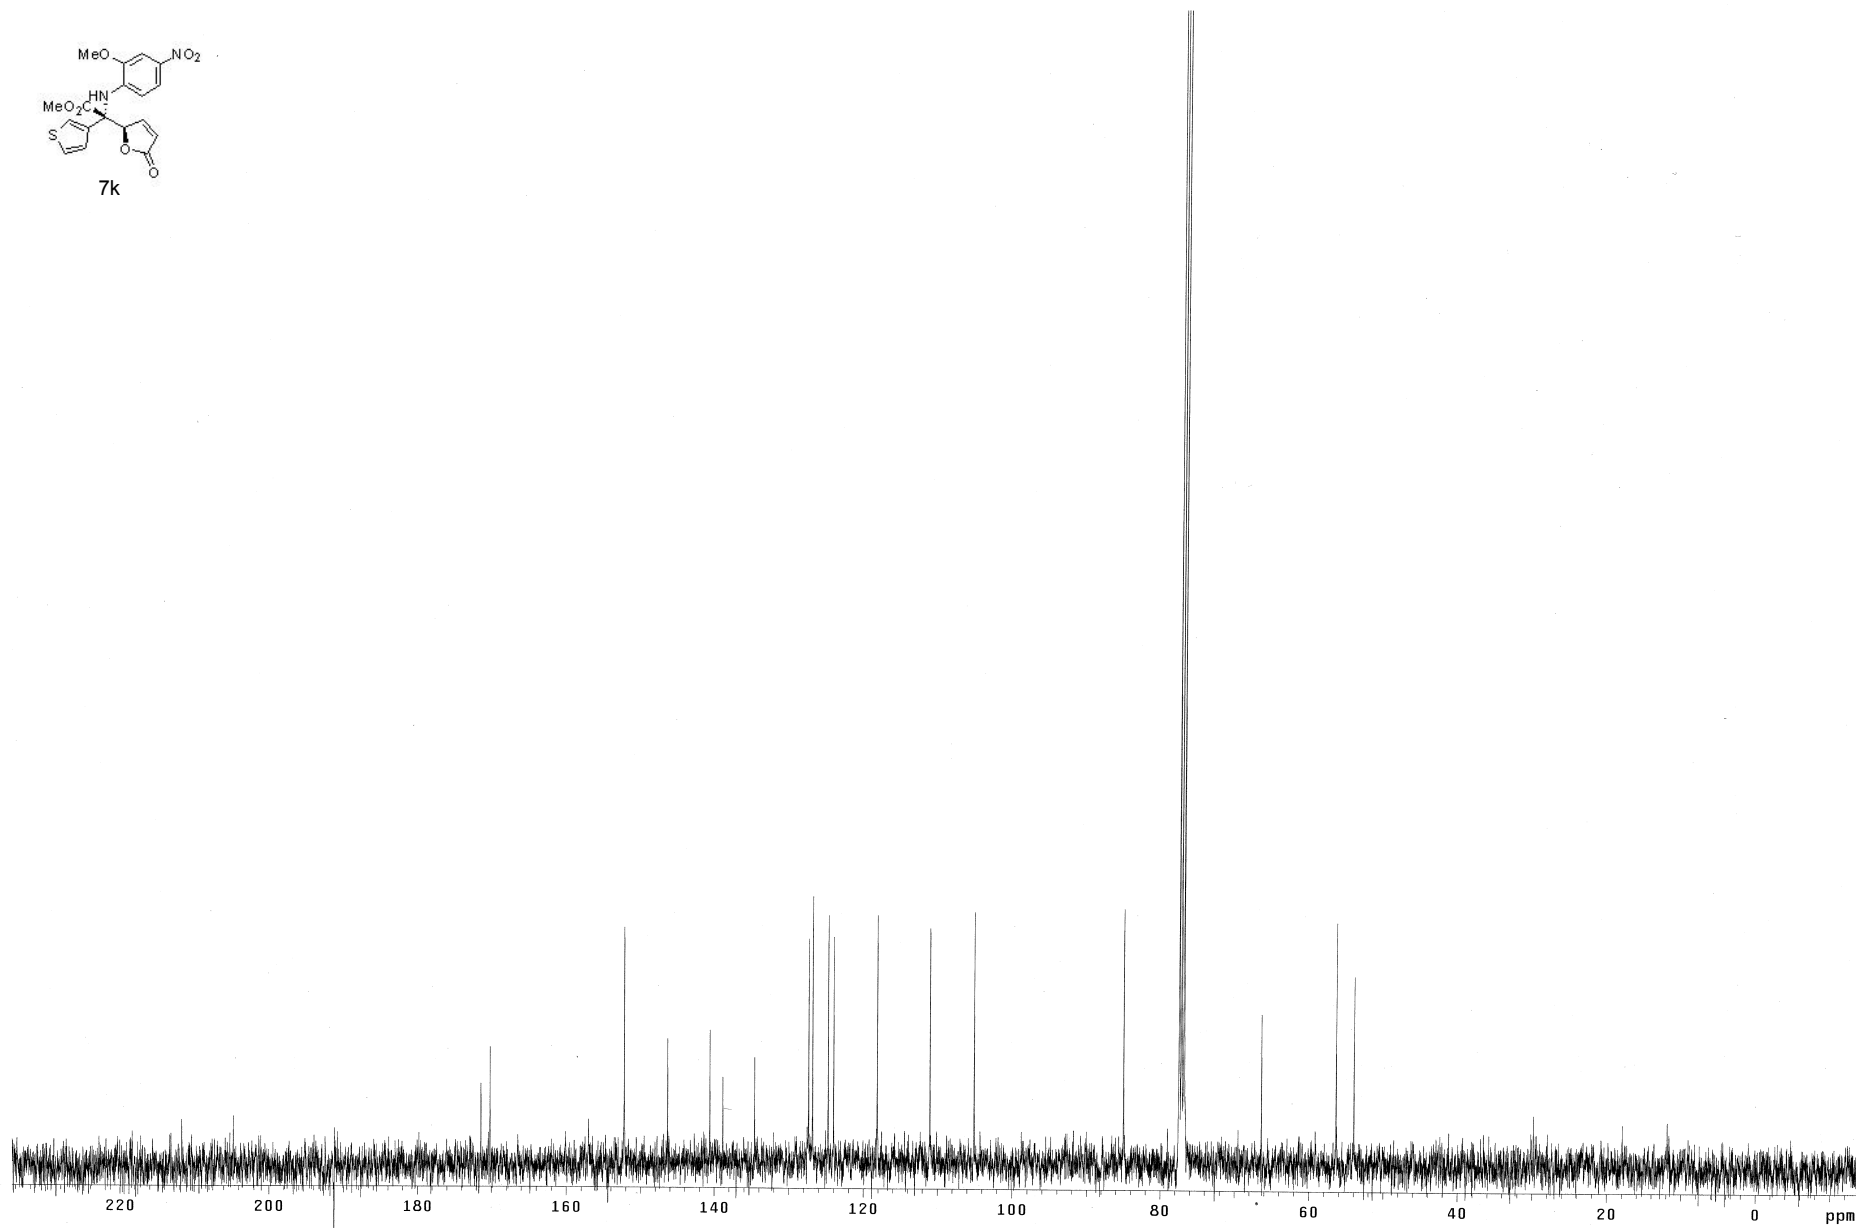

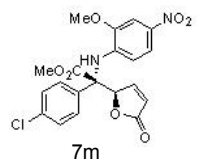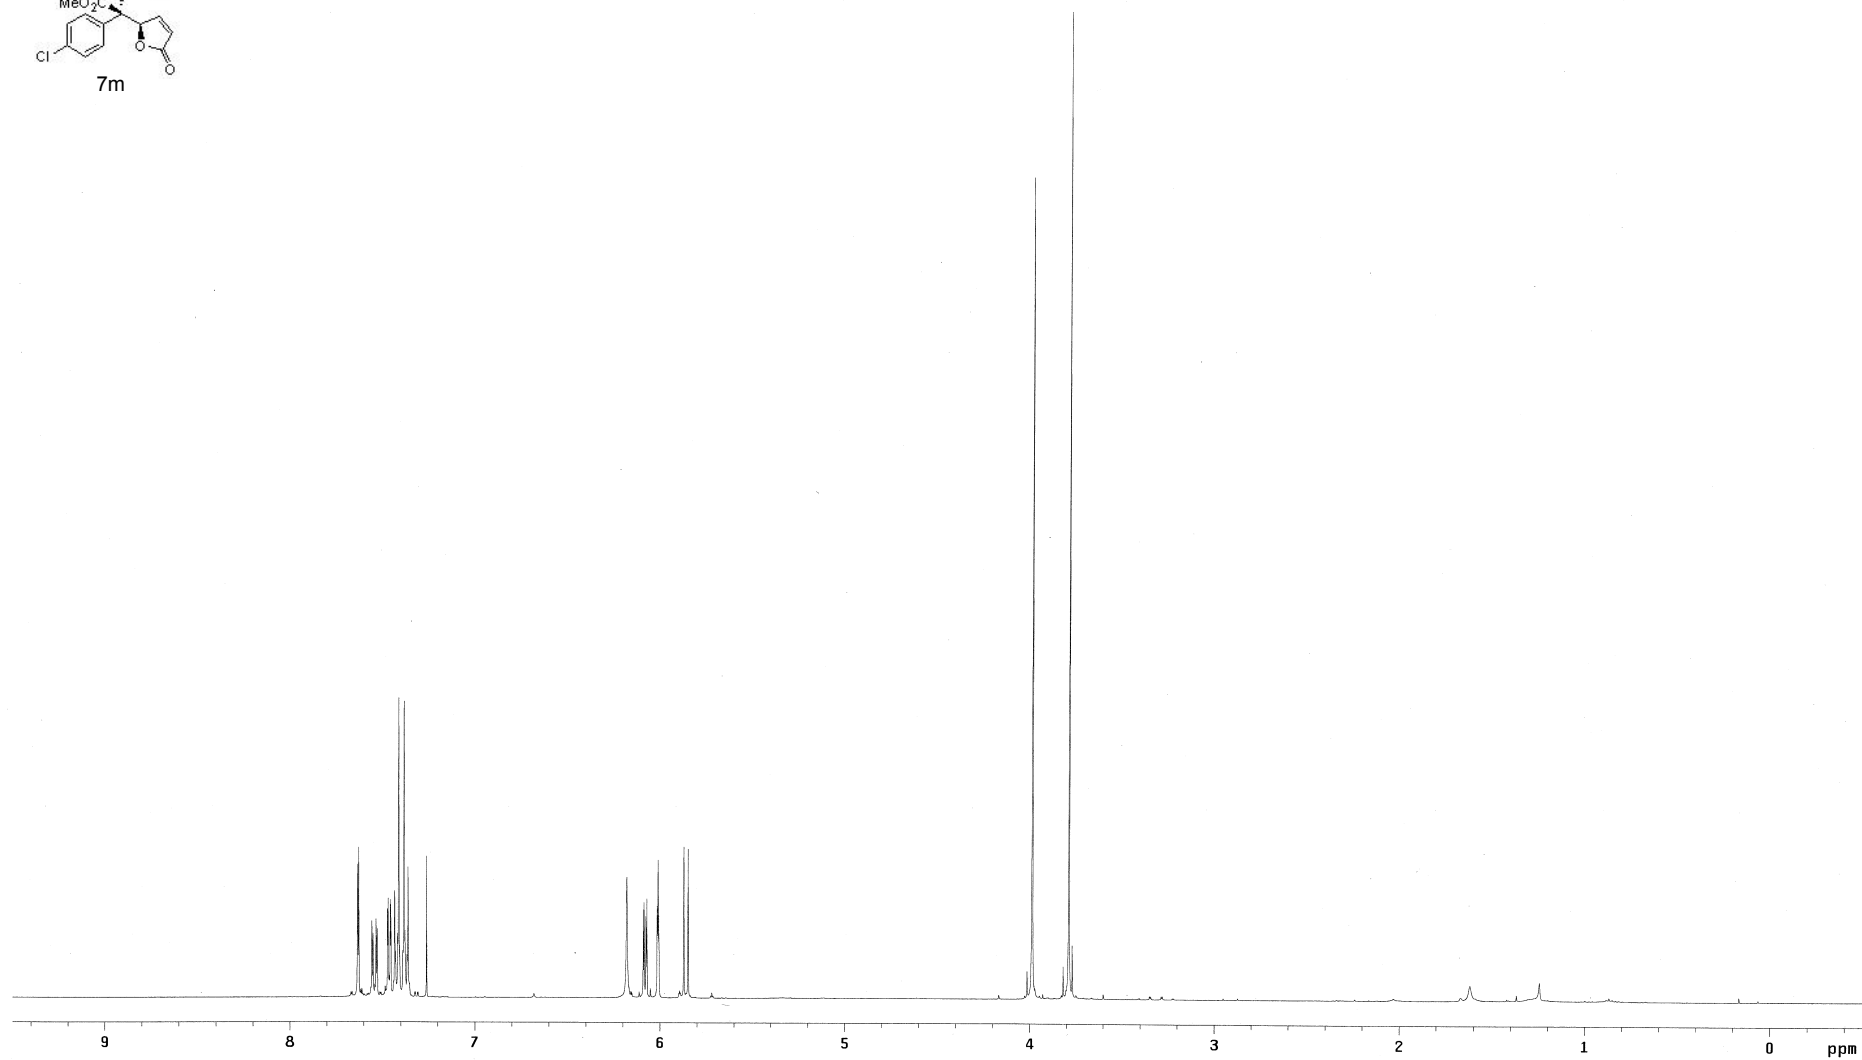



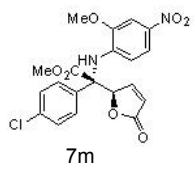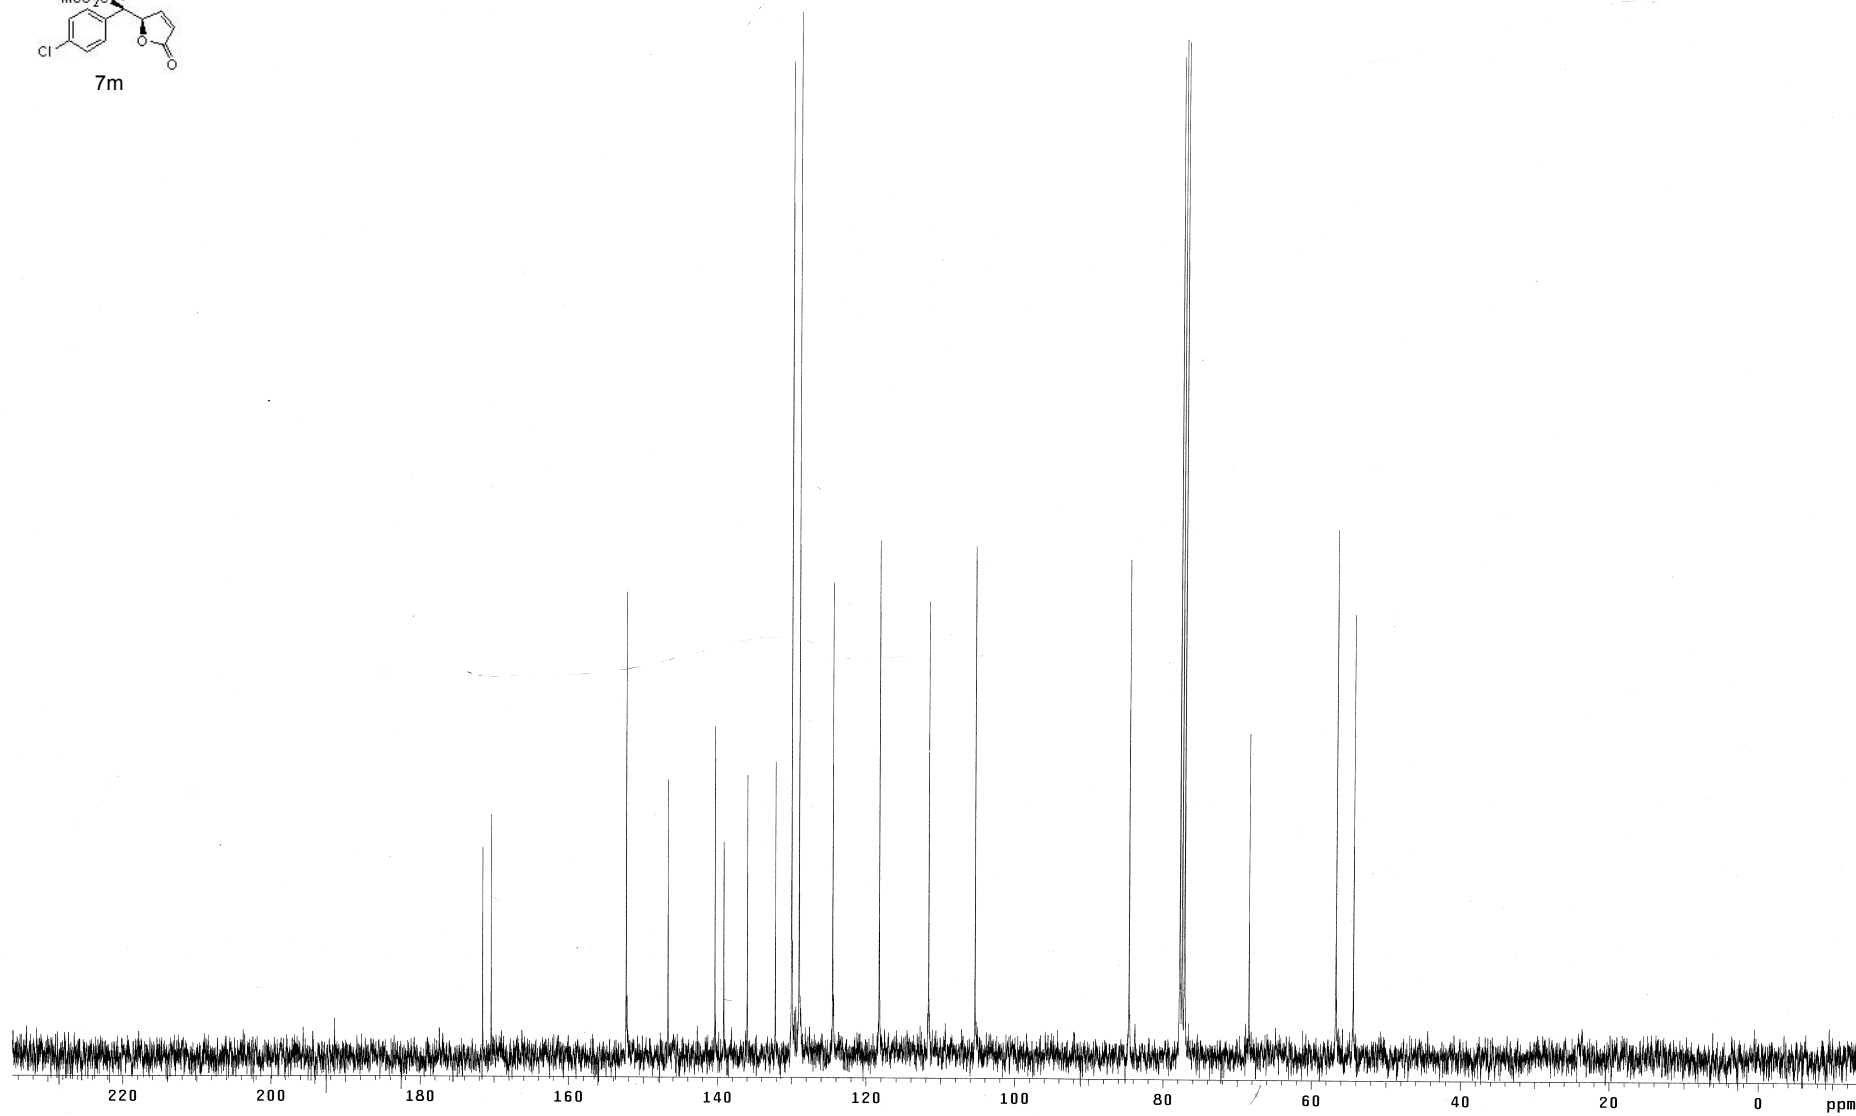

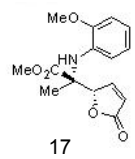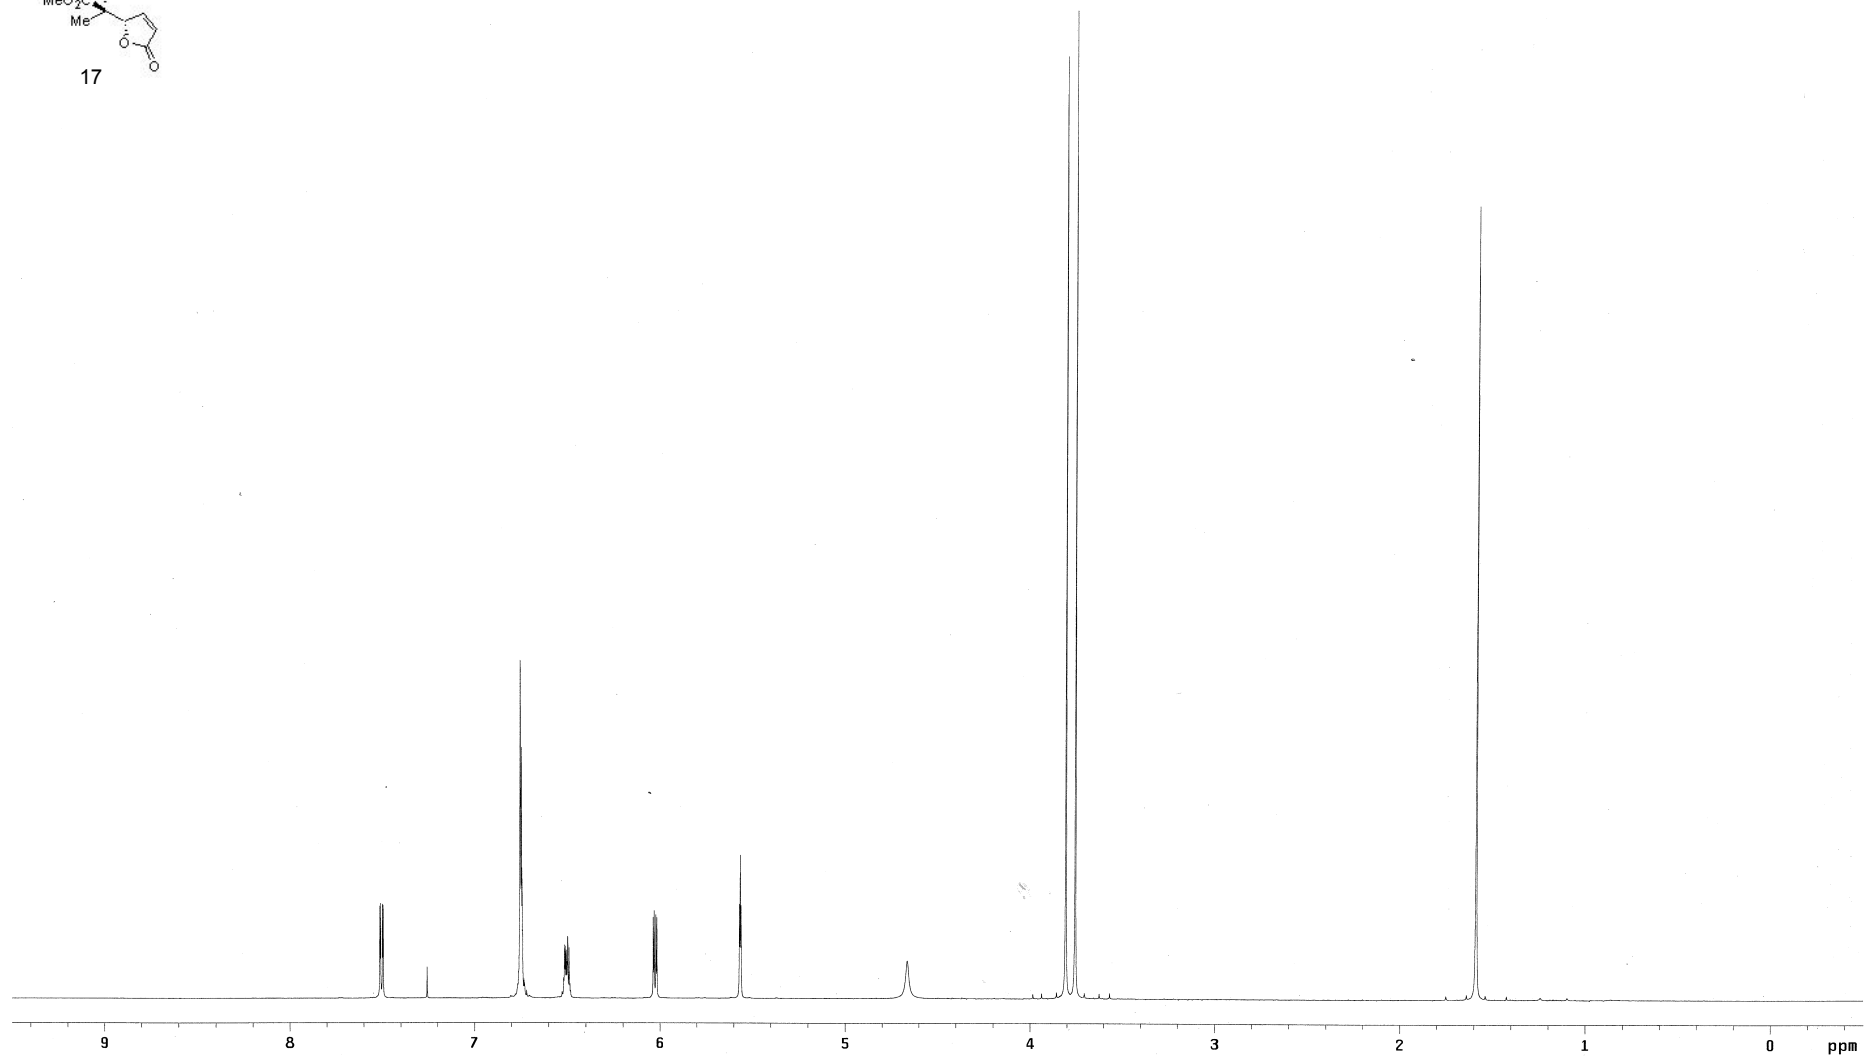

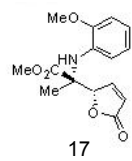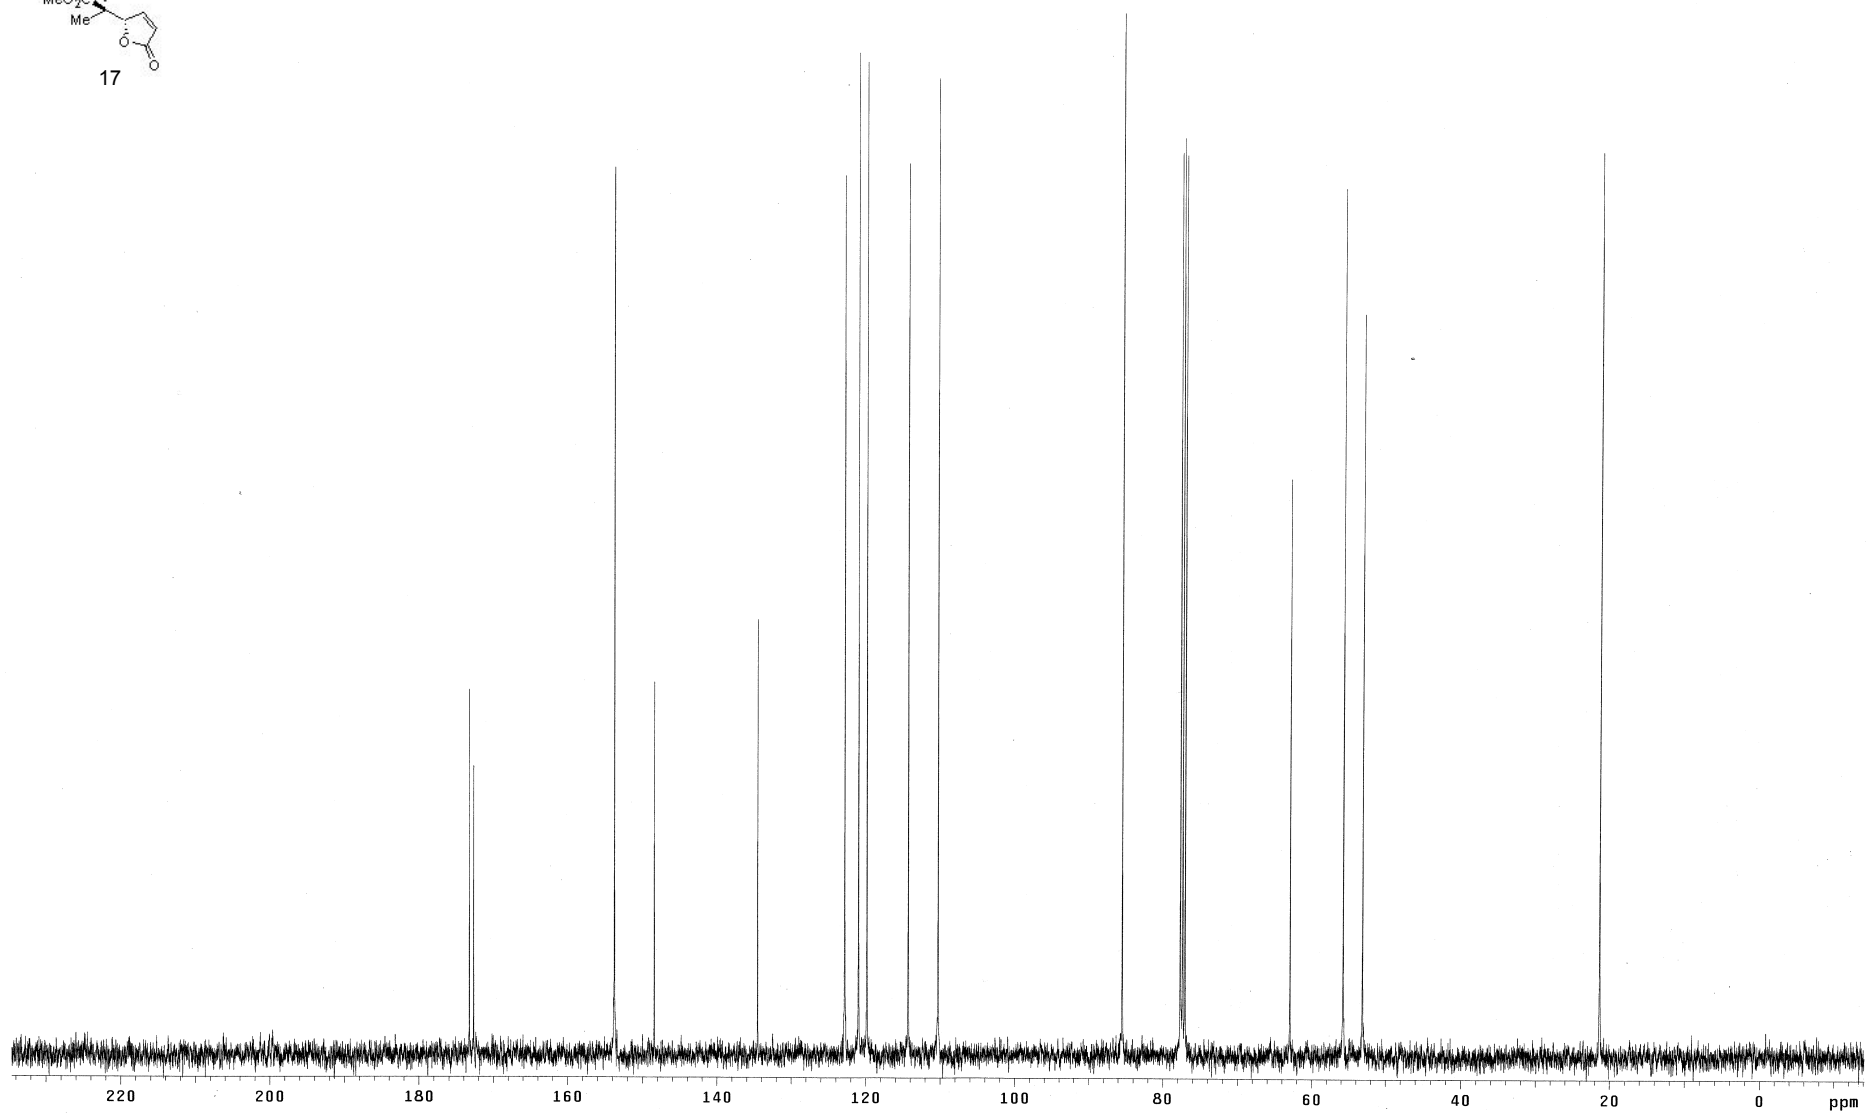

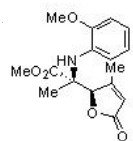

18

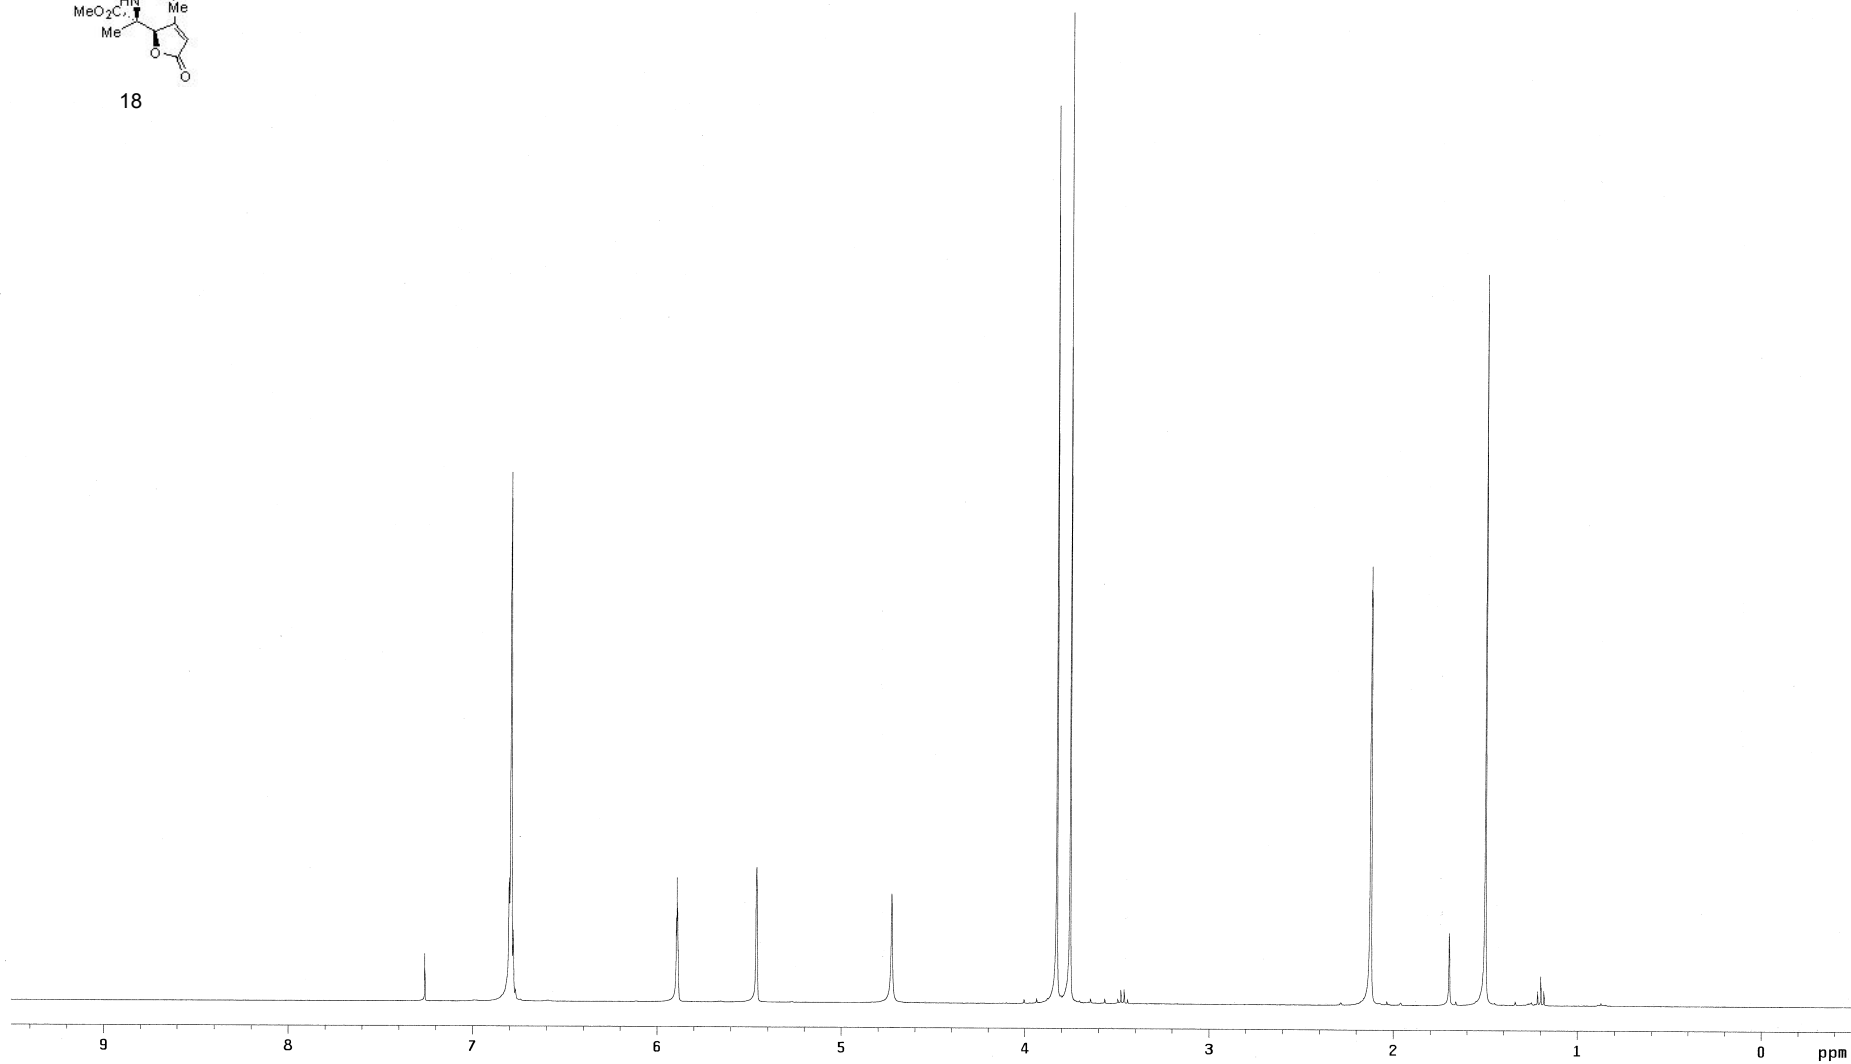

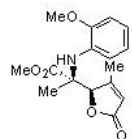

18

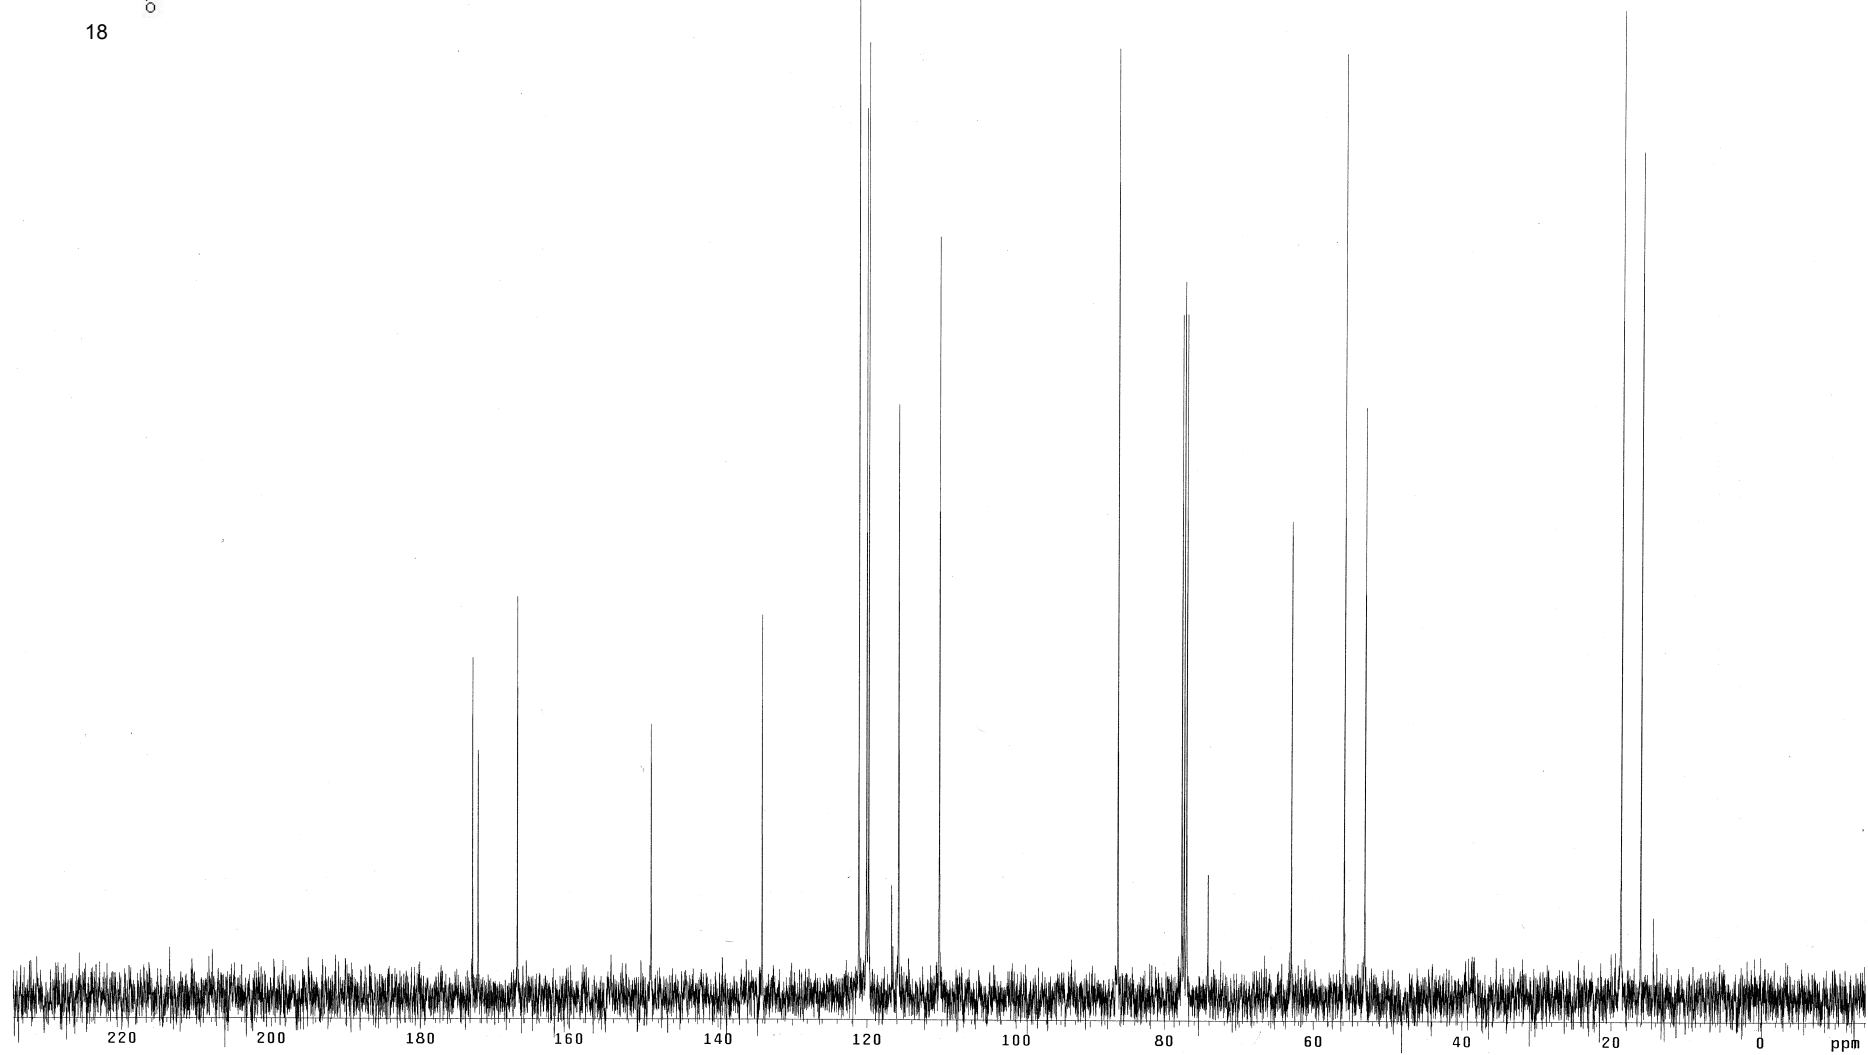

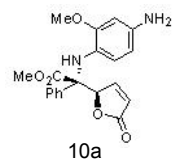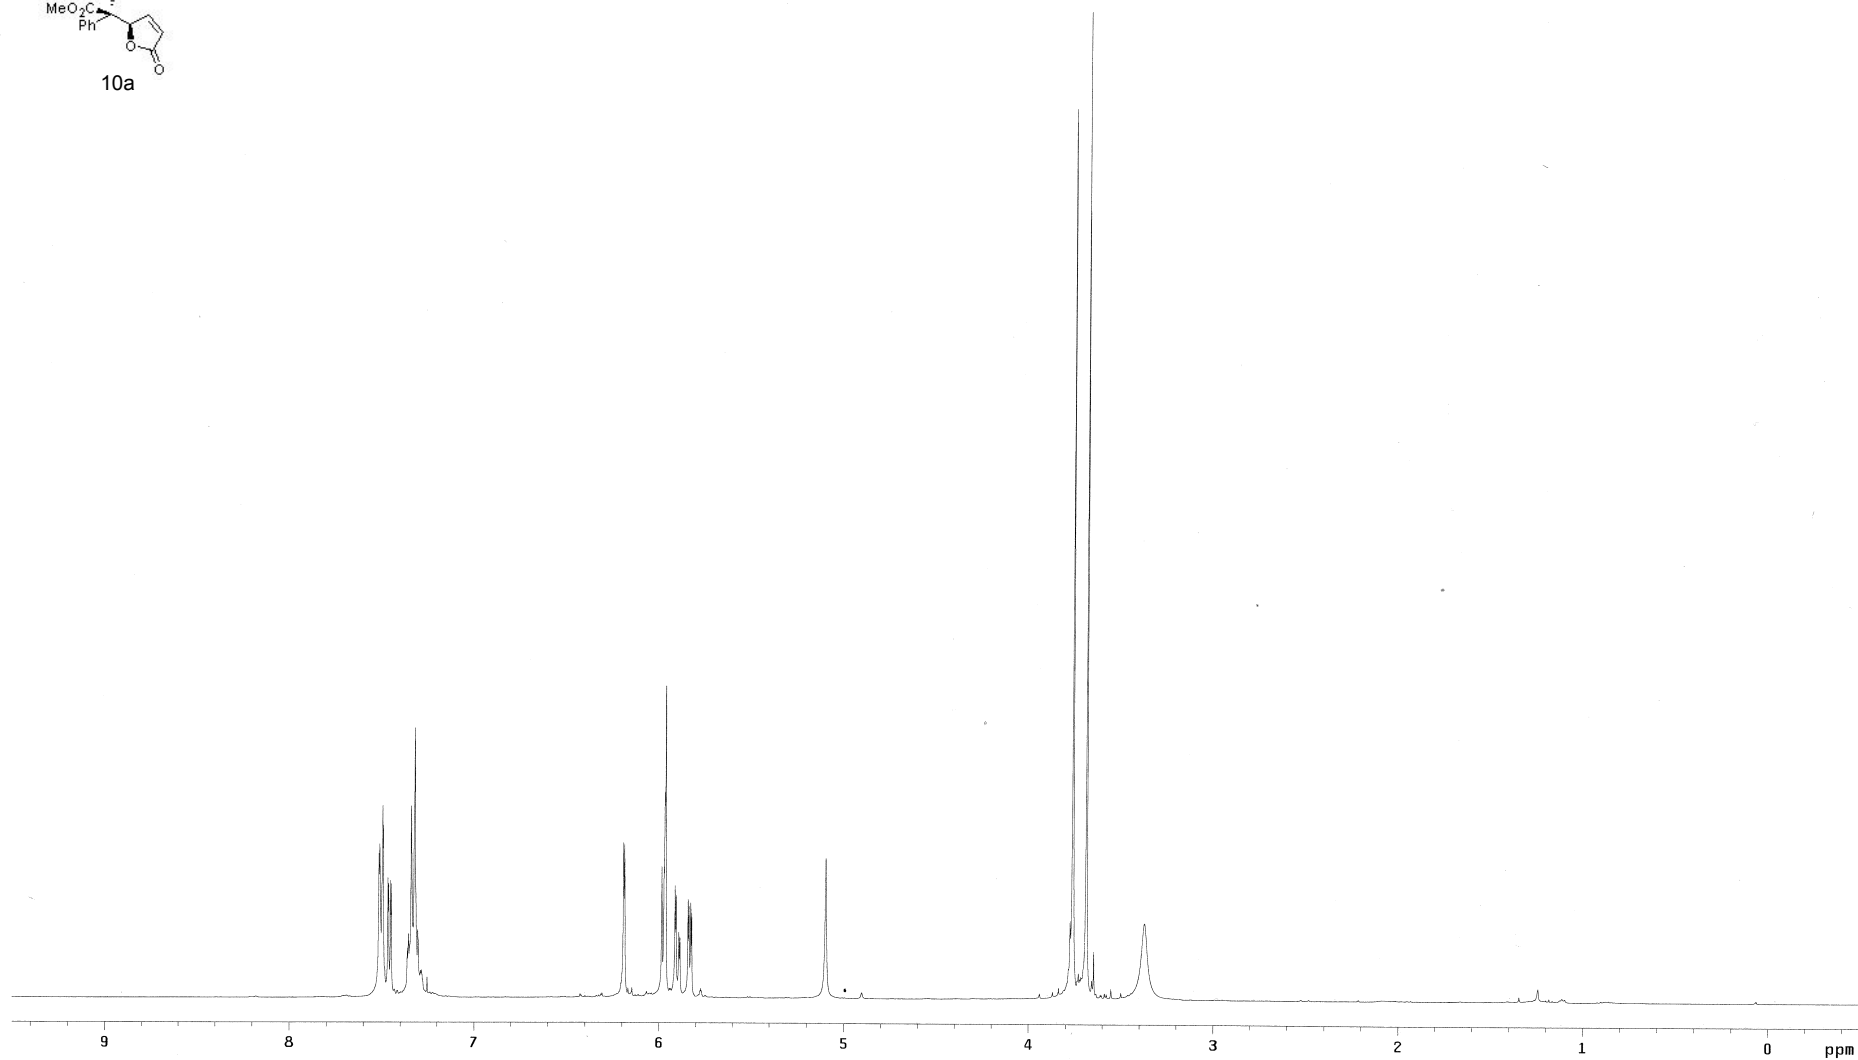

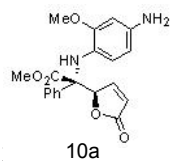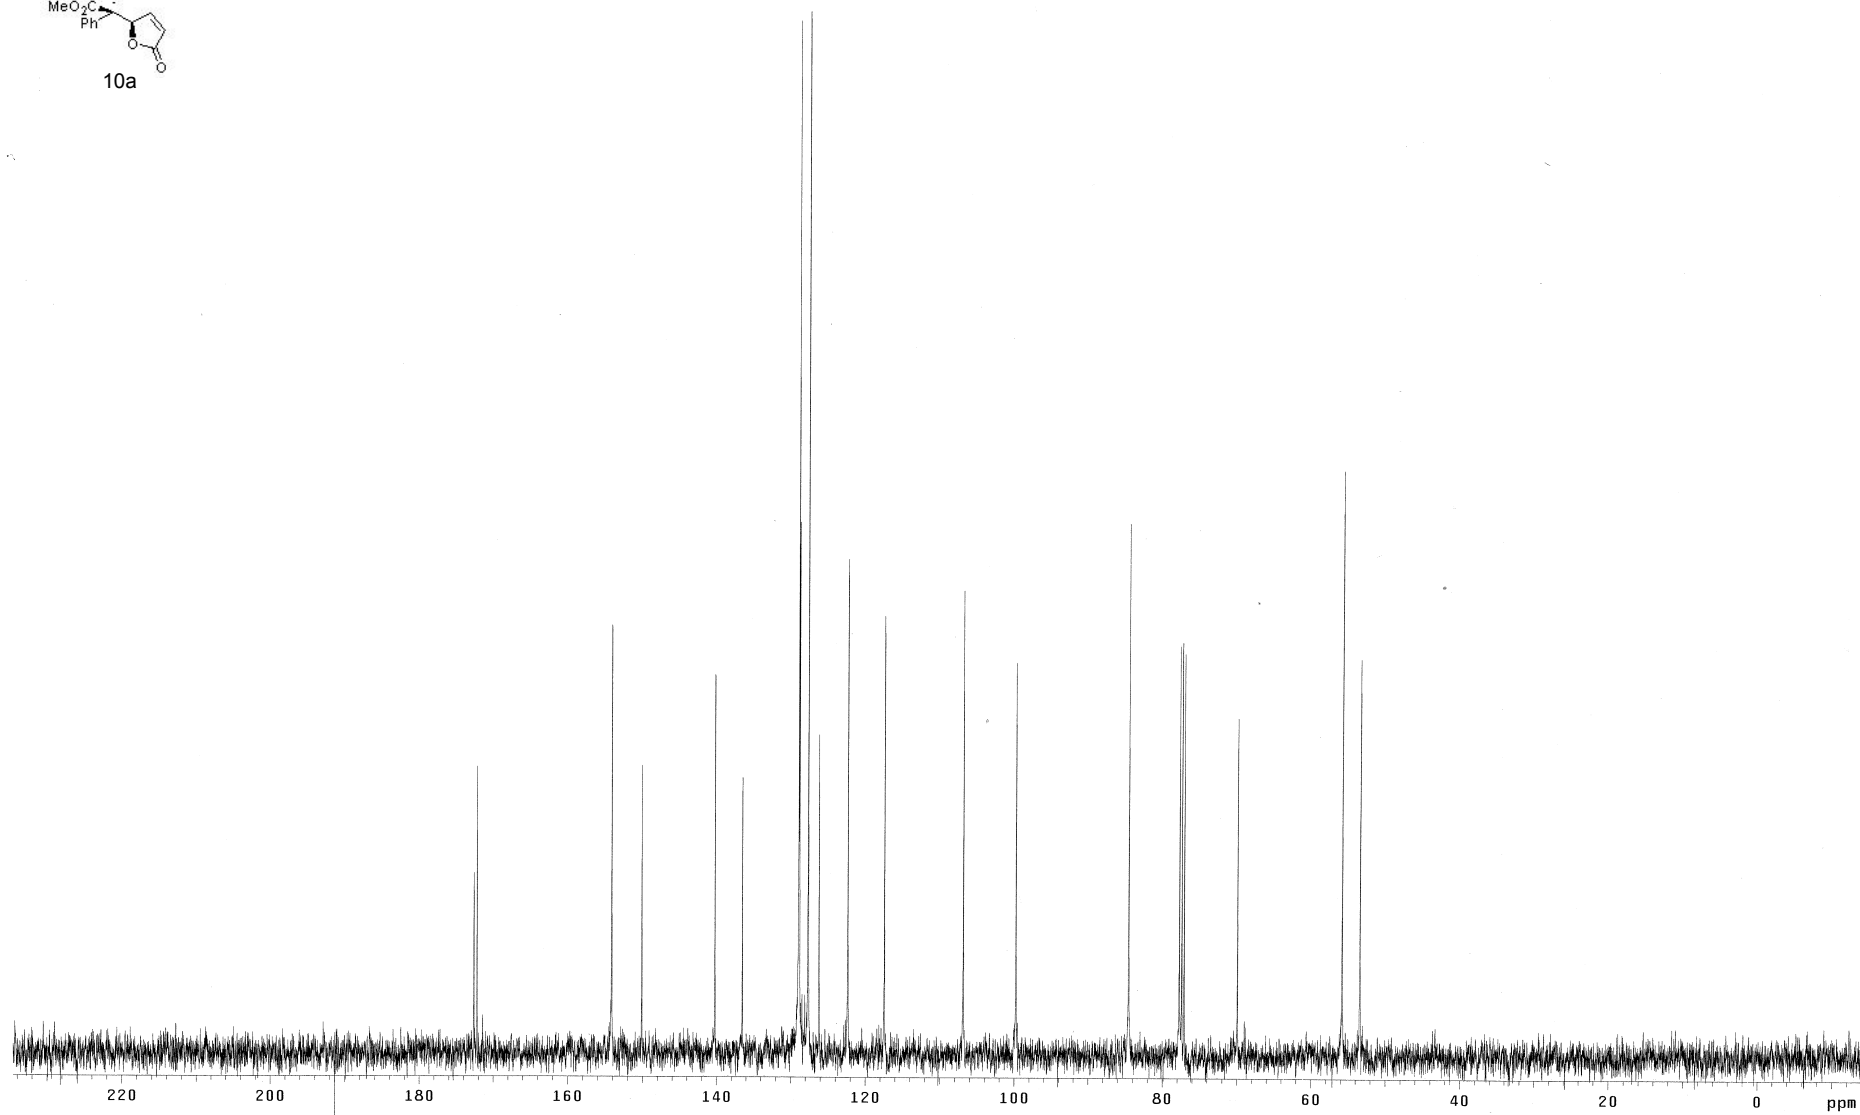

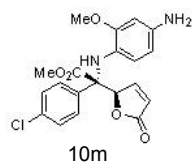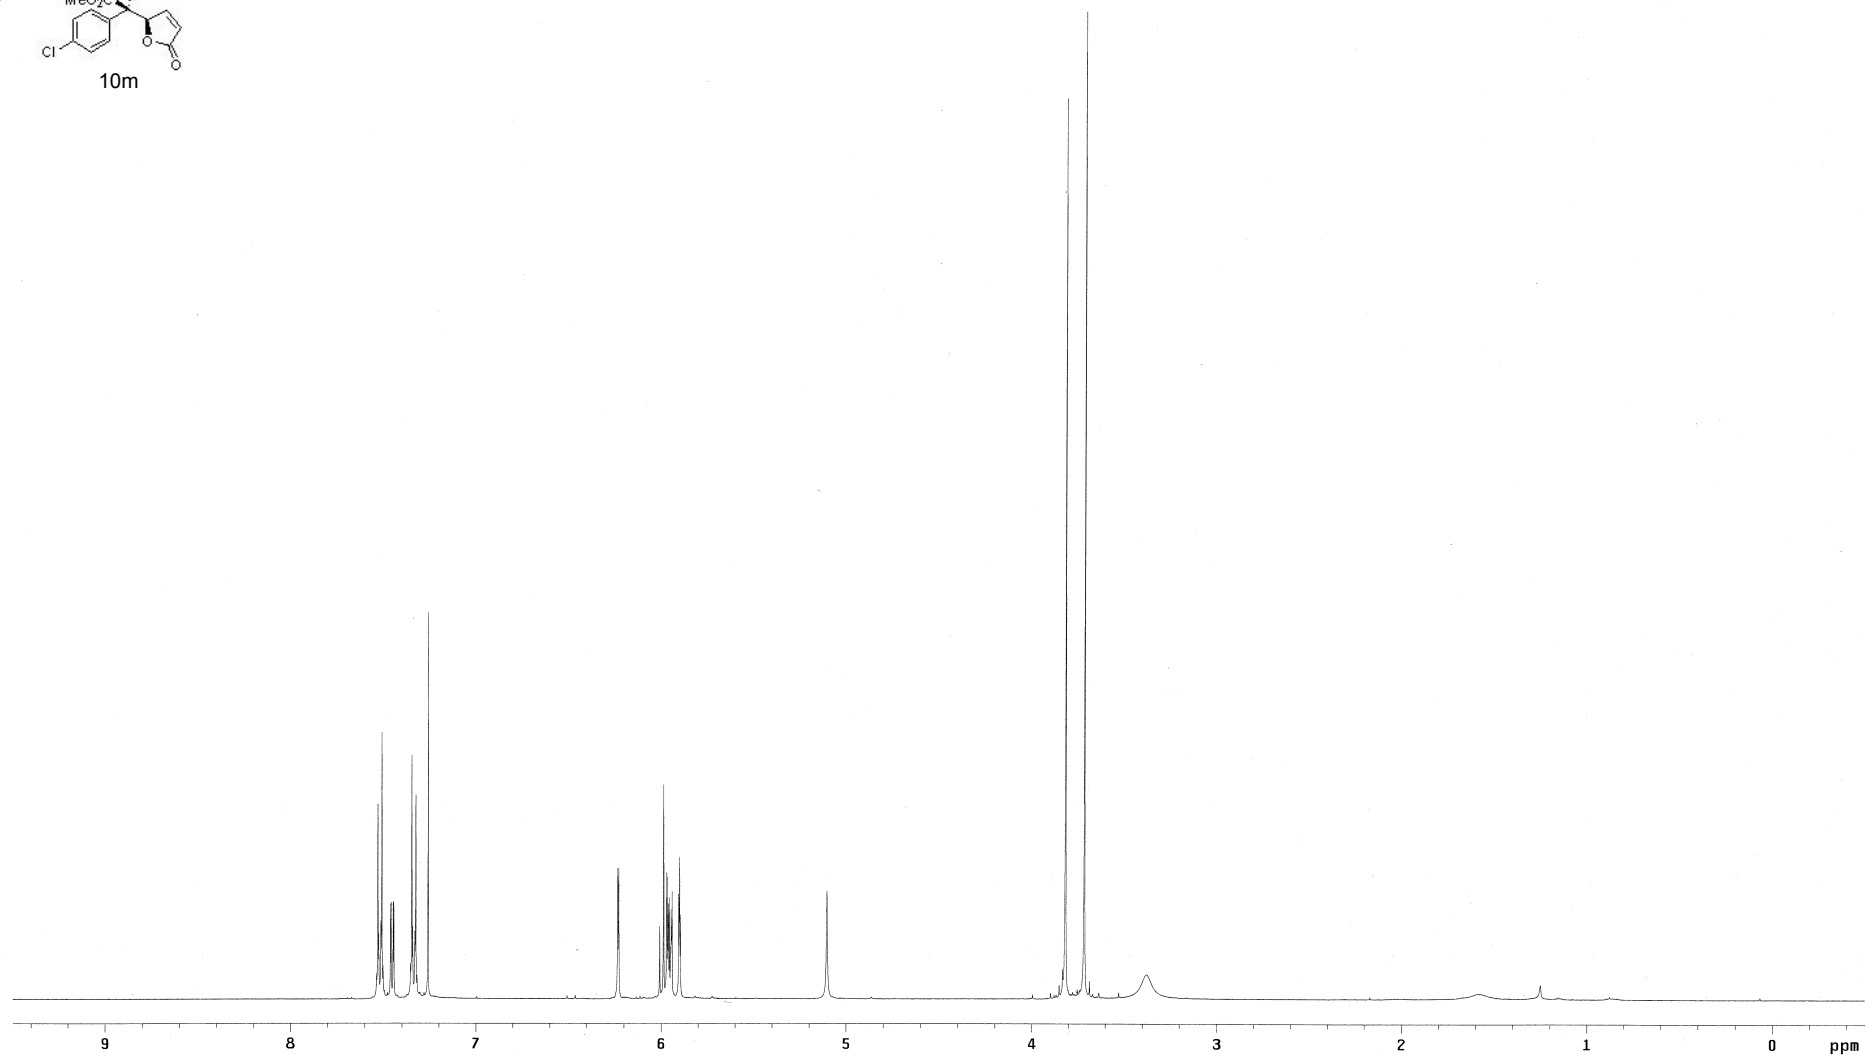



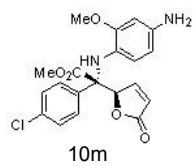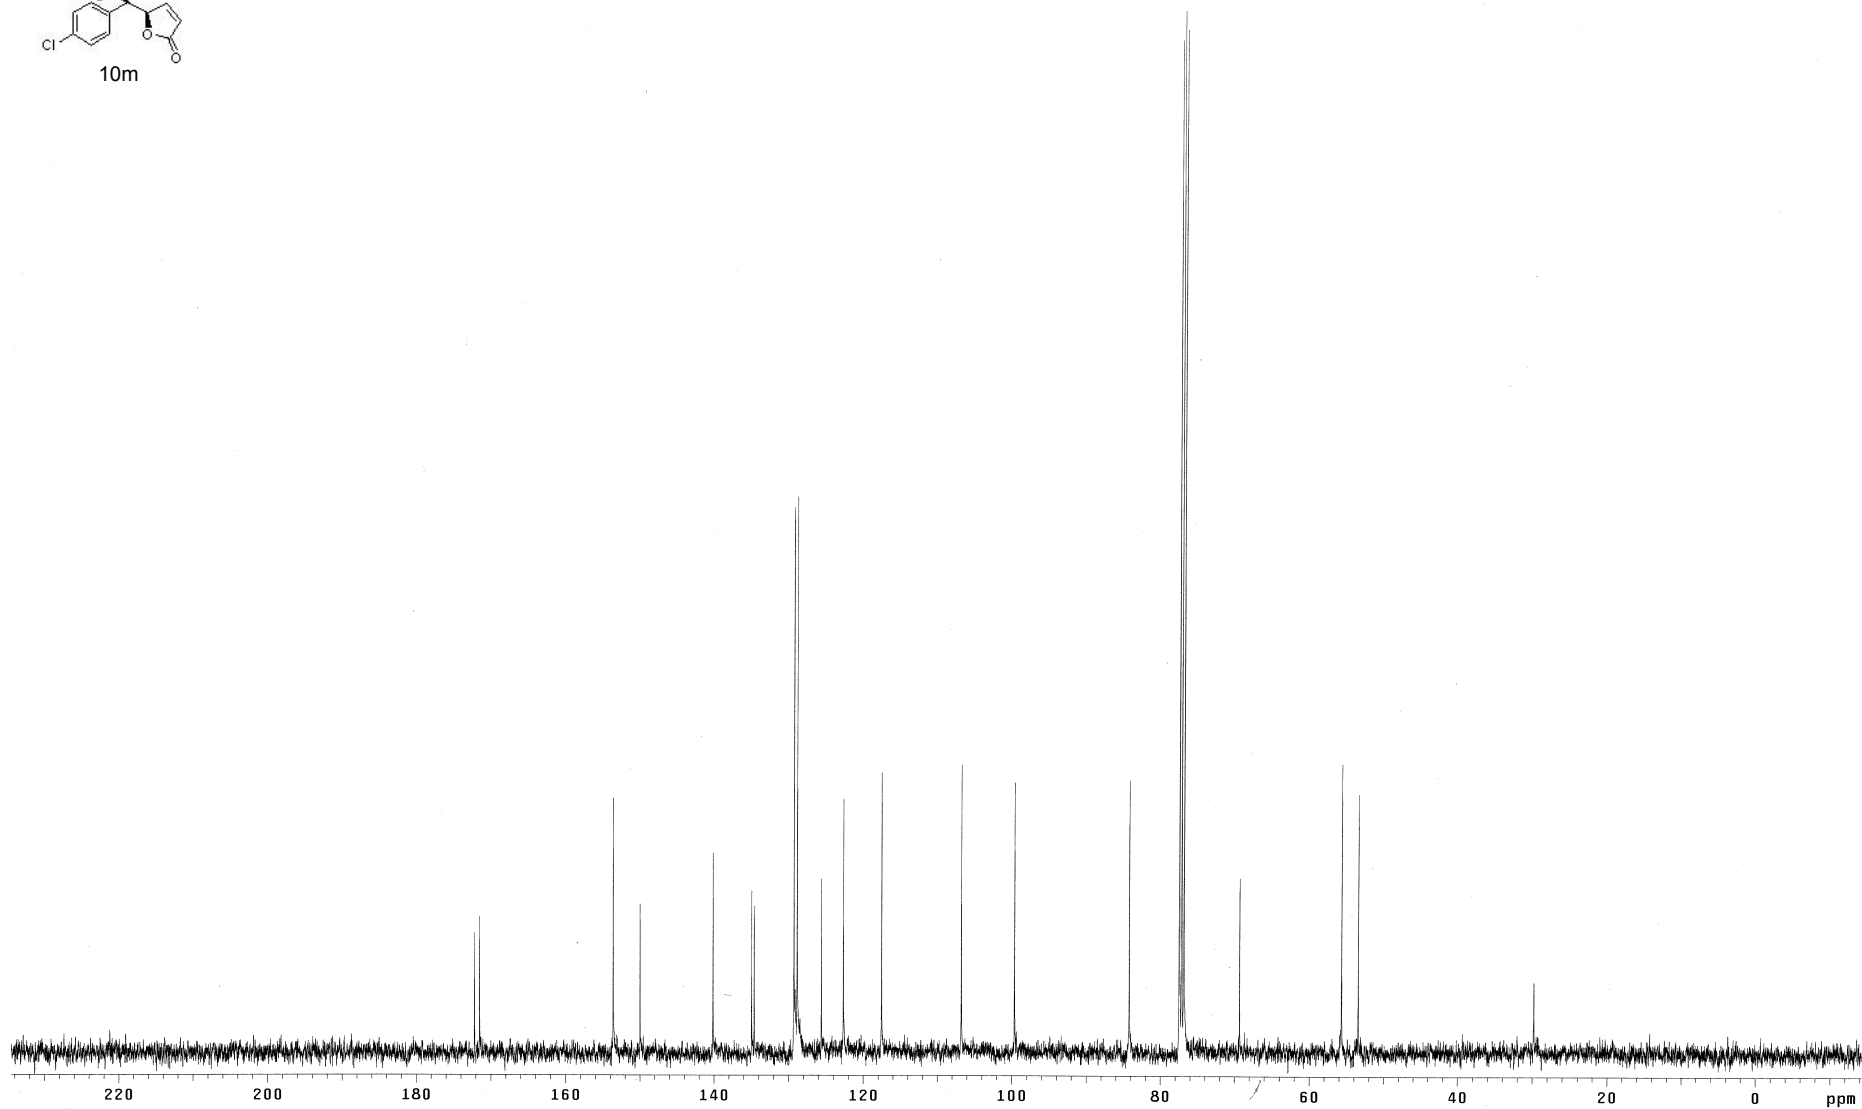

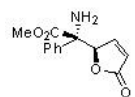

11

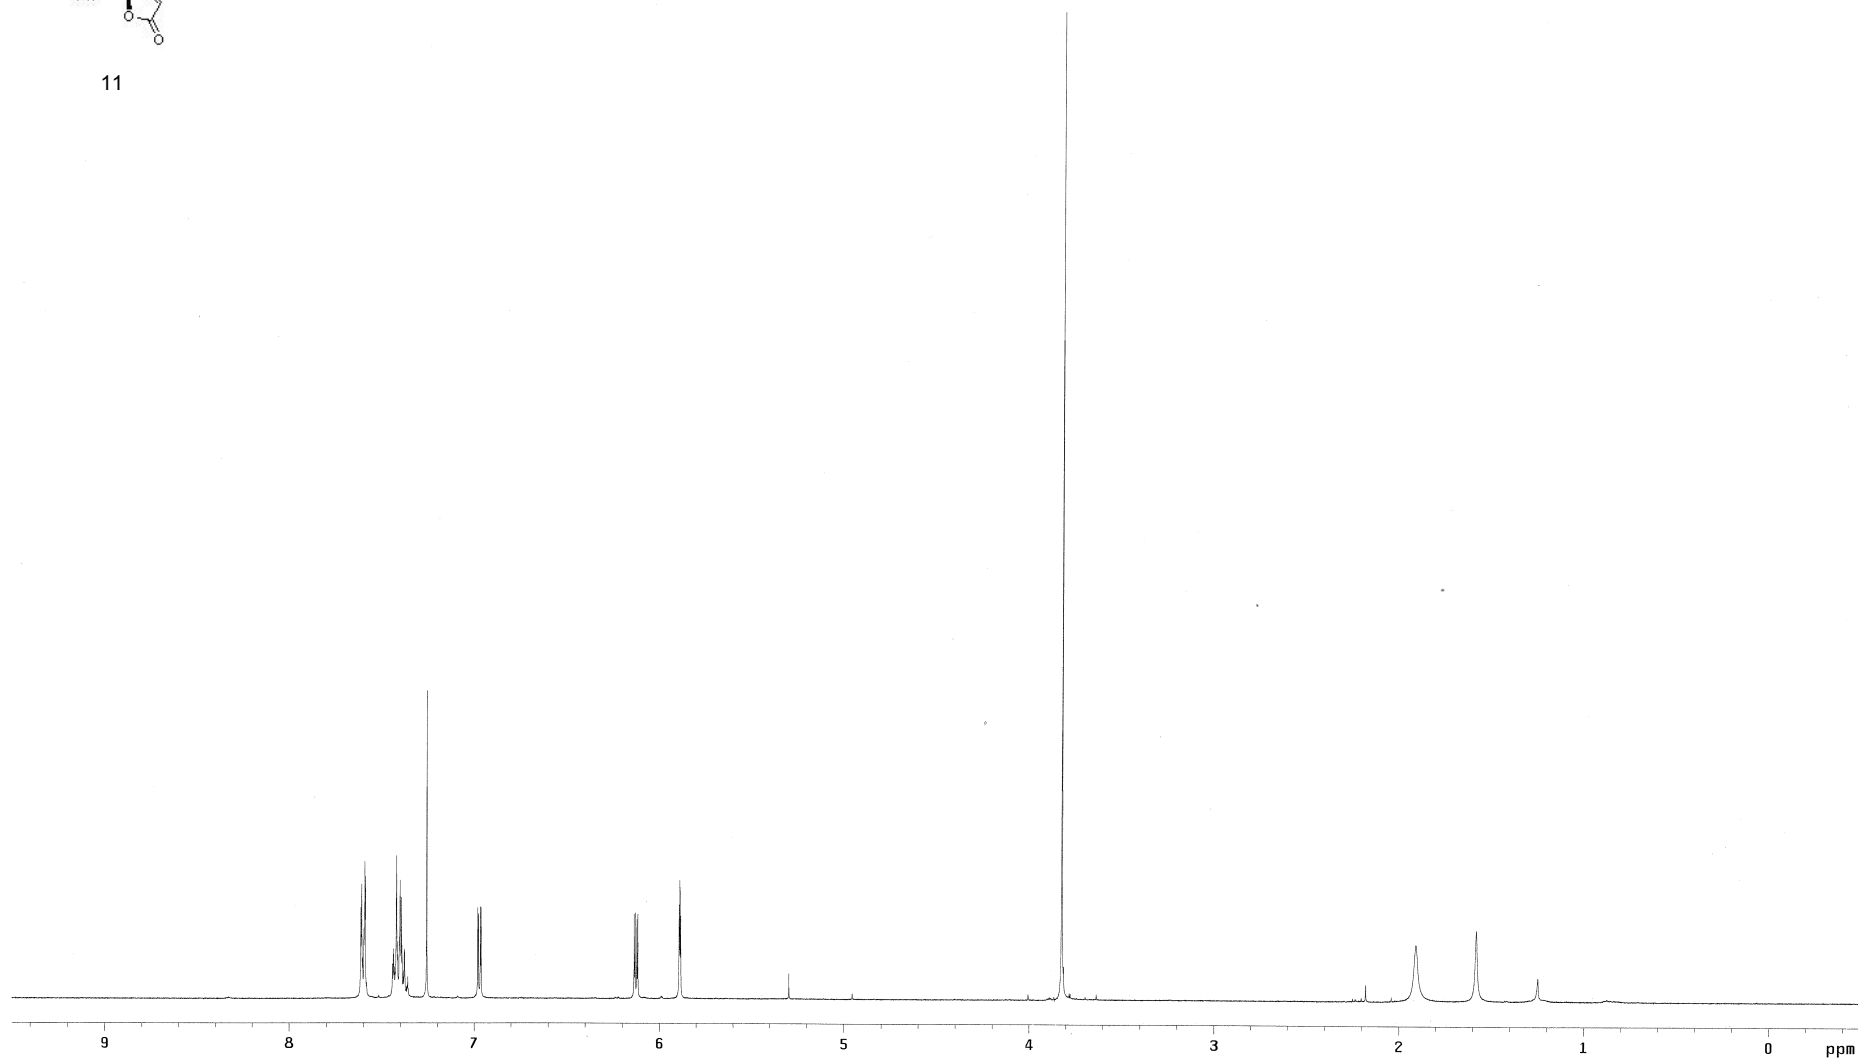

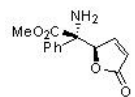

11

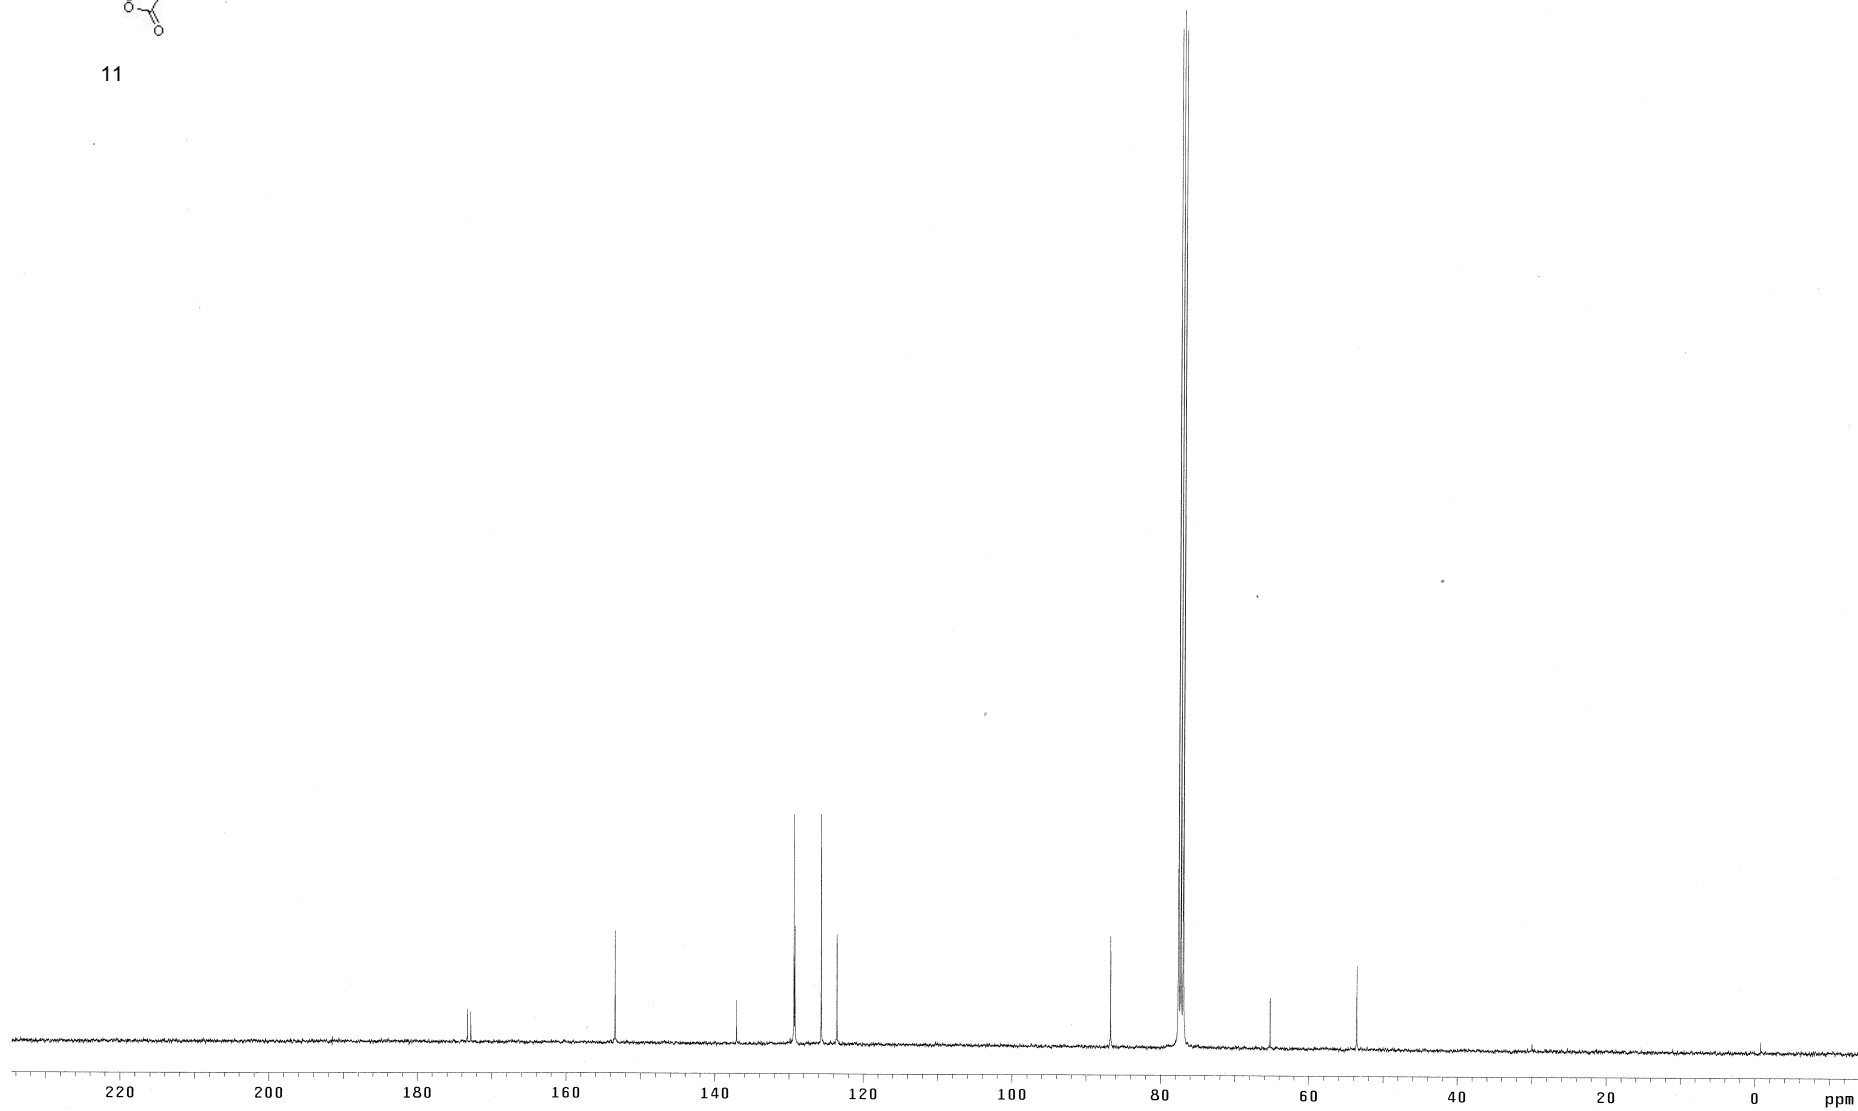

*Powder form of AgOAc-1 complex*

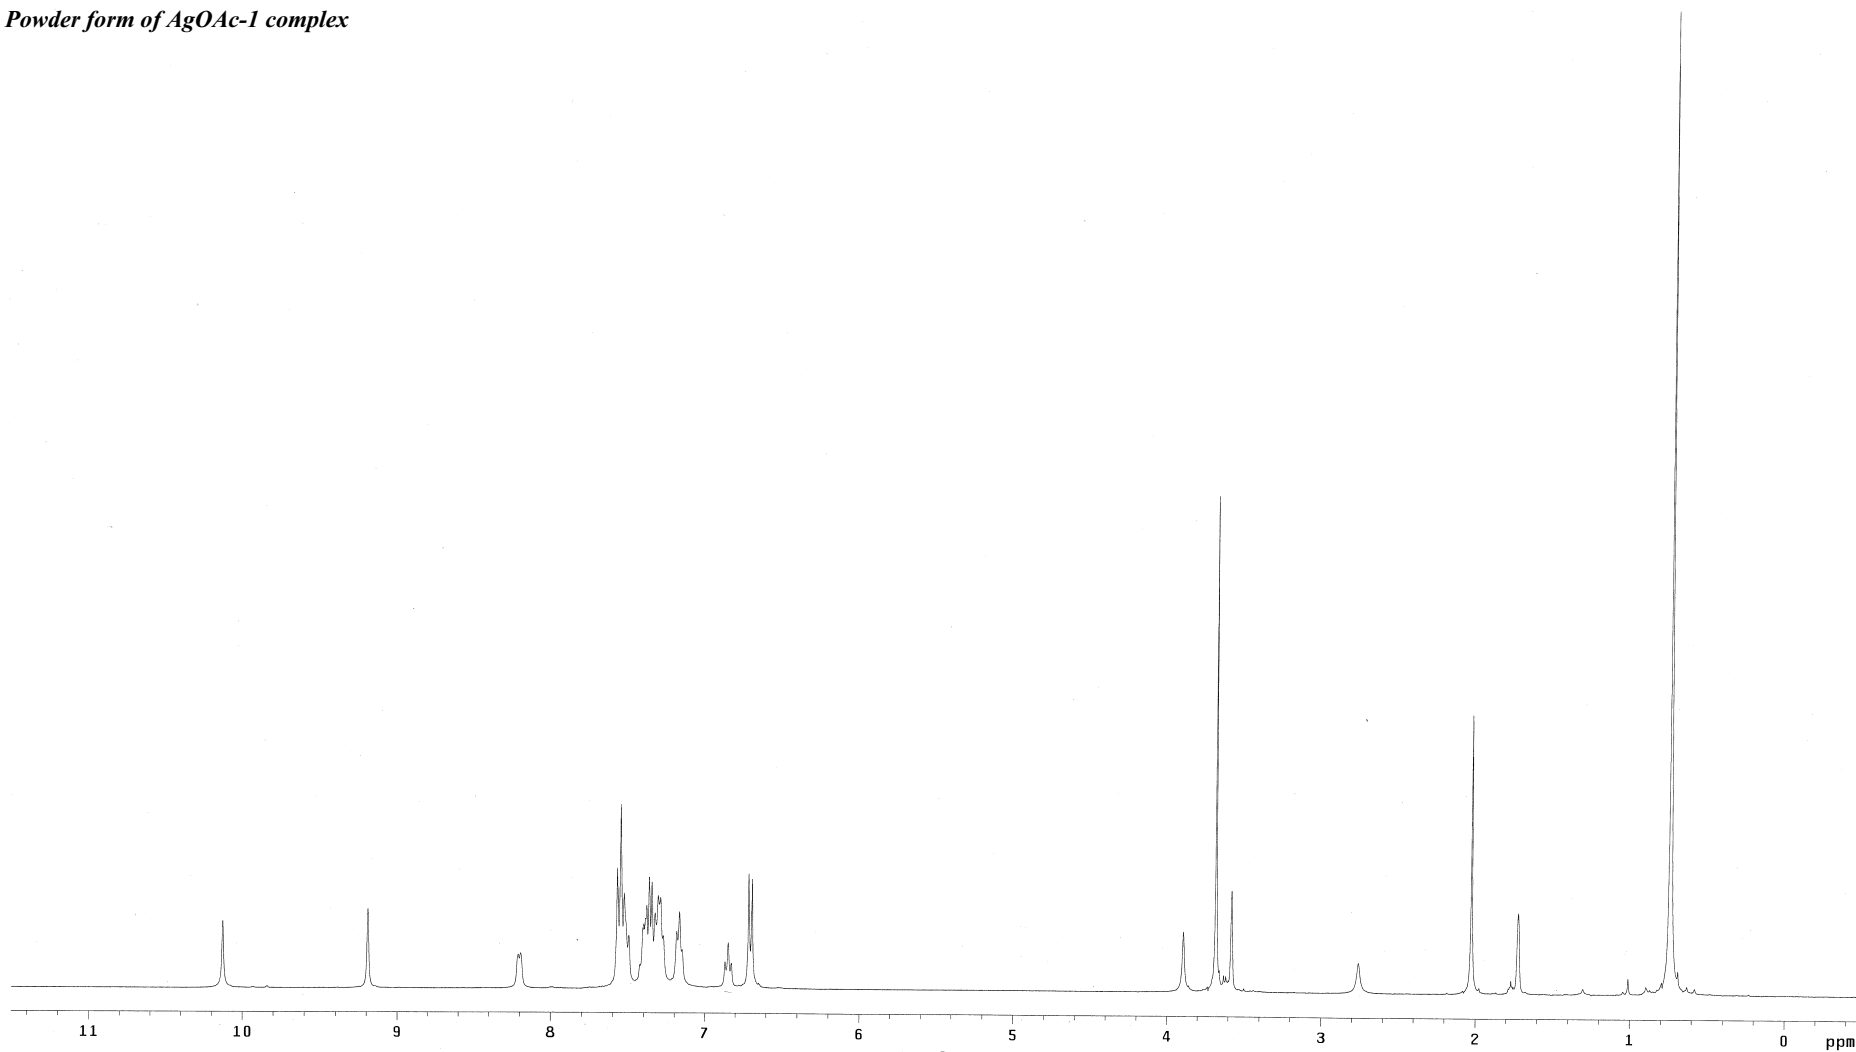

*Powder form of AgOAc-1 complex*

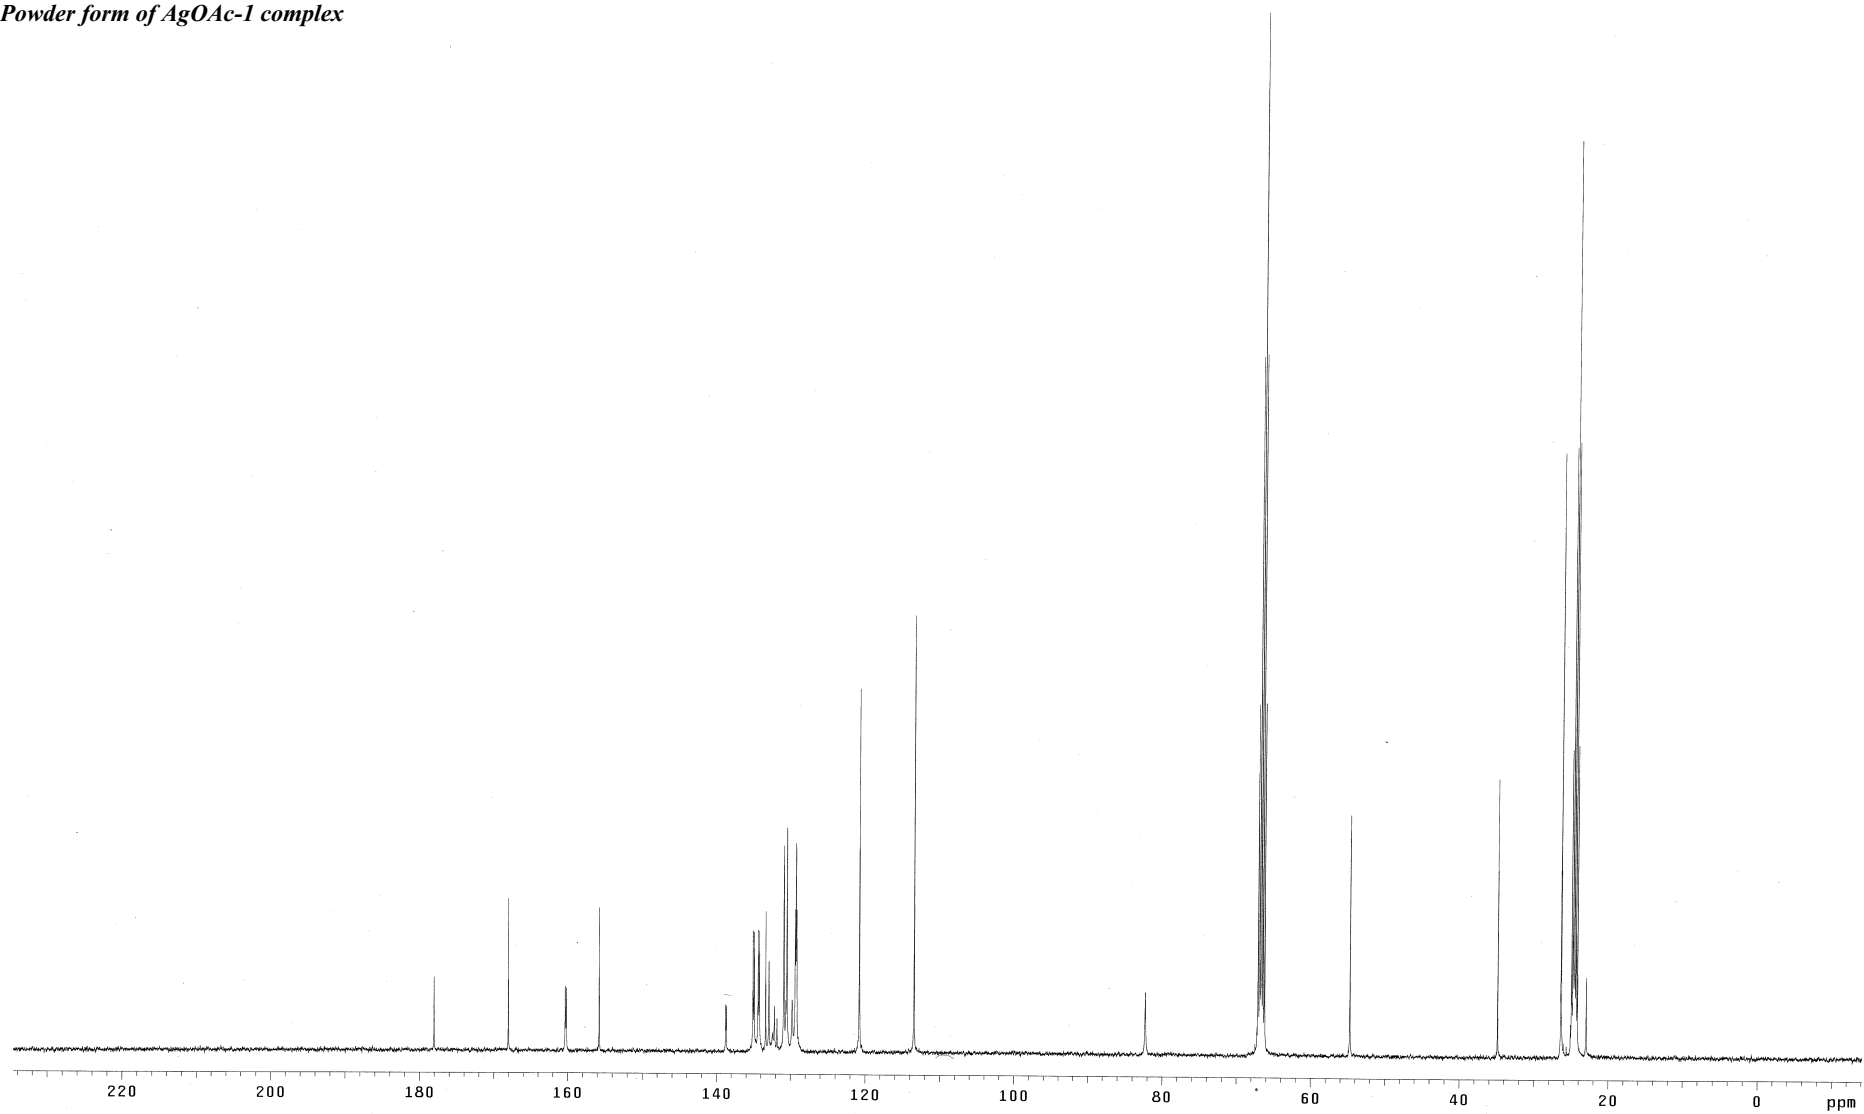

400 MHz  $^1\text{H}$  NMR spectra of powder form of AgOAc-1 complex in  $d_8$ -THF at various temperatures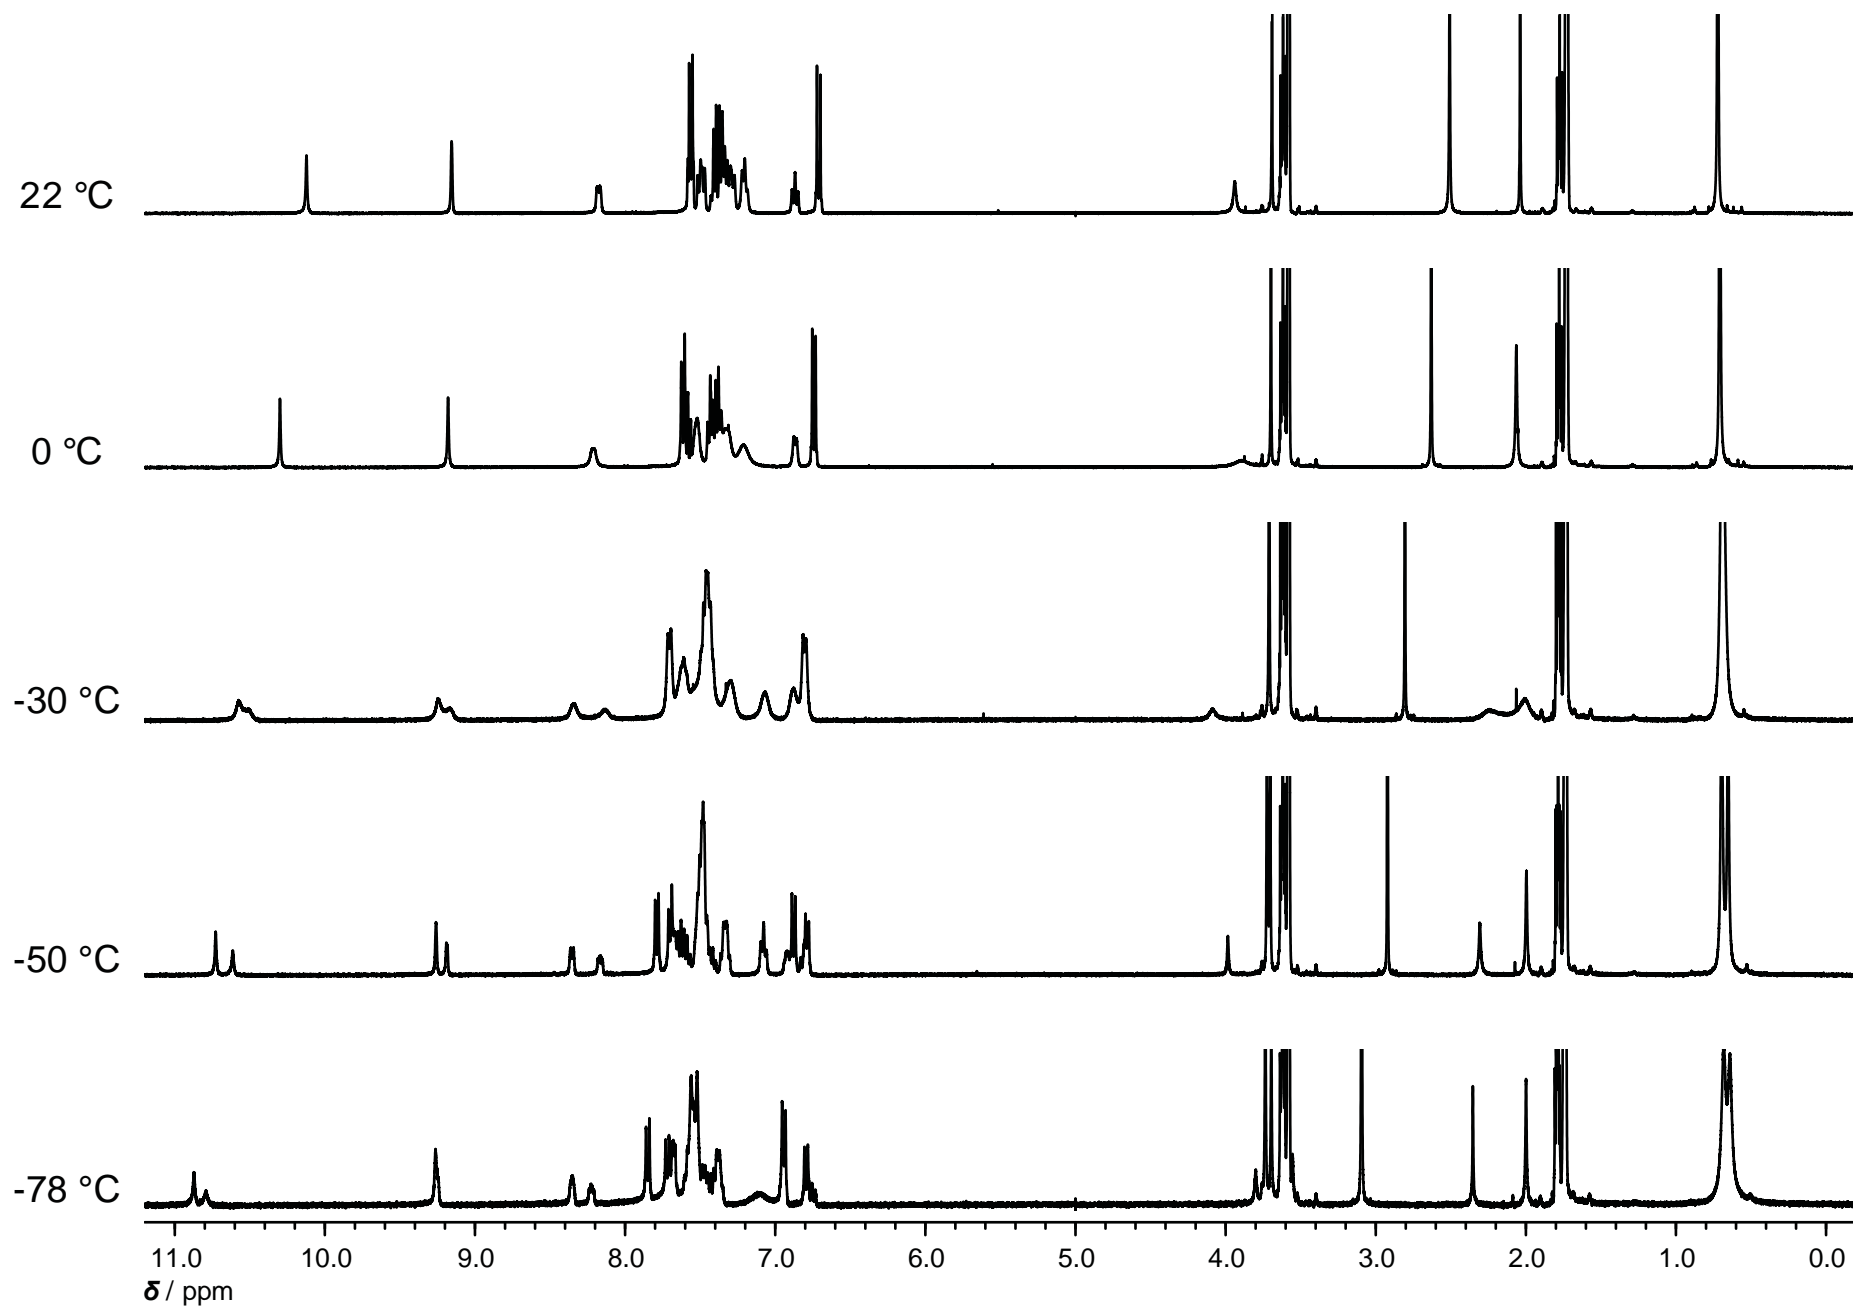

400 MHz  $^1\text{H}$  NMR spectra of powder form of AgOAc-1 complex in  $d_8$ -THF at various temperatures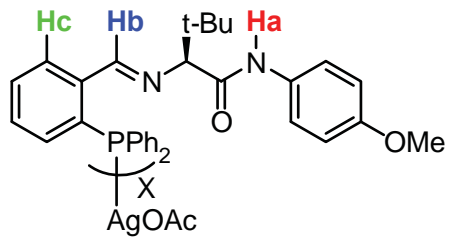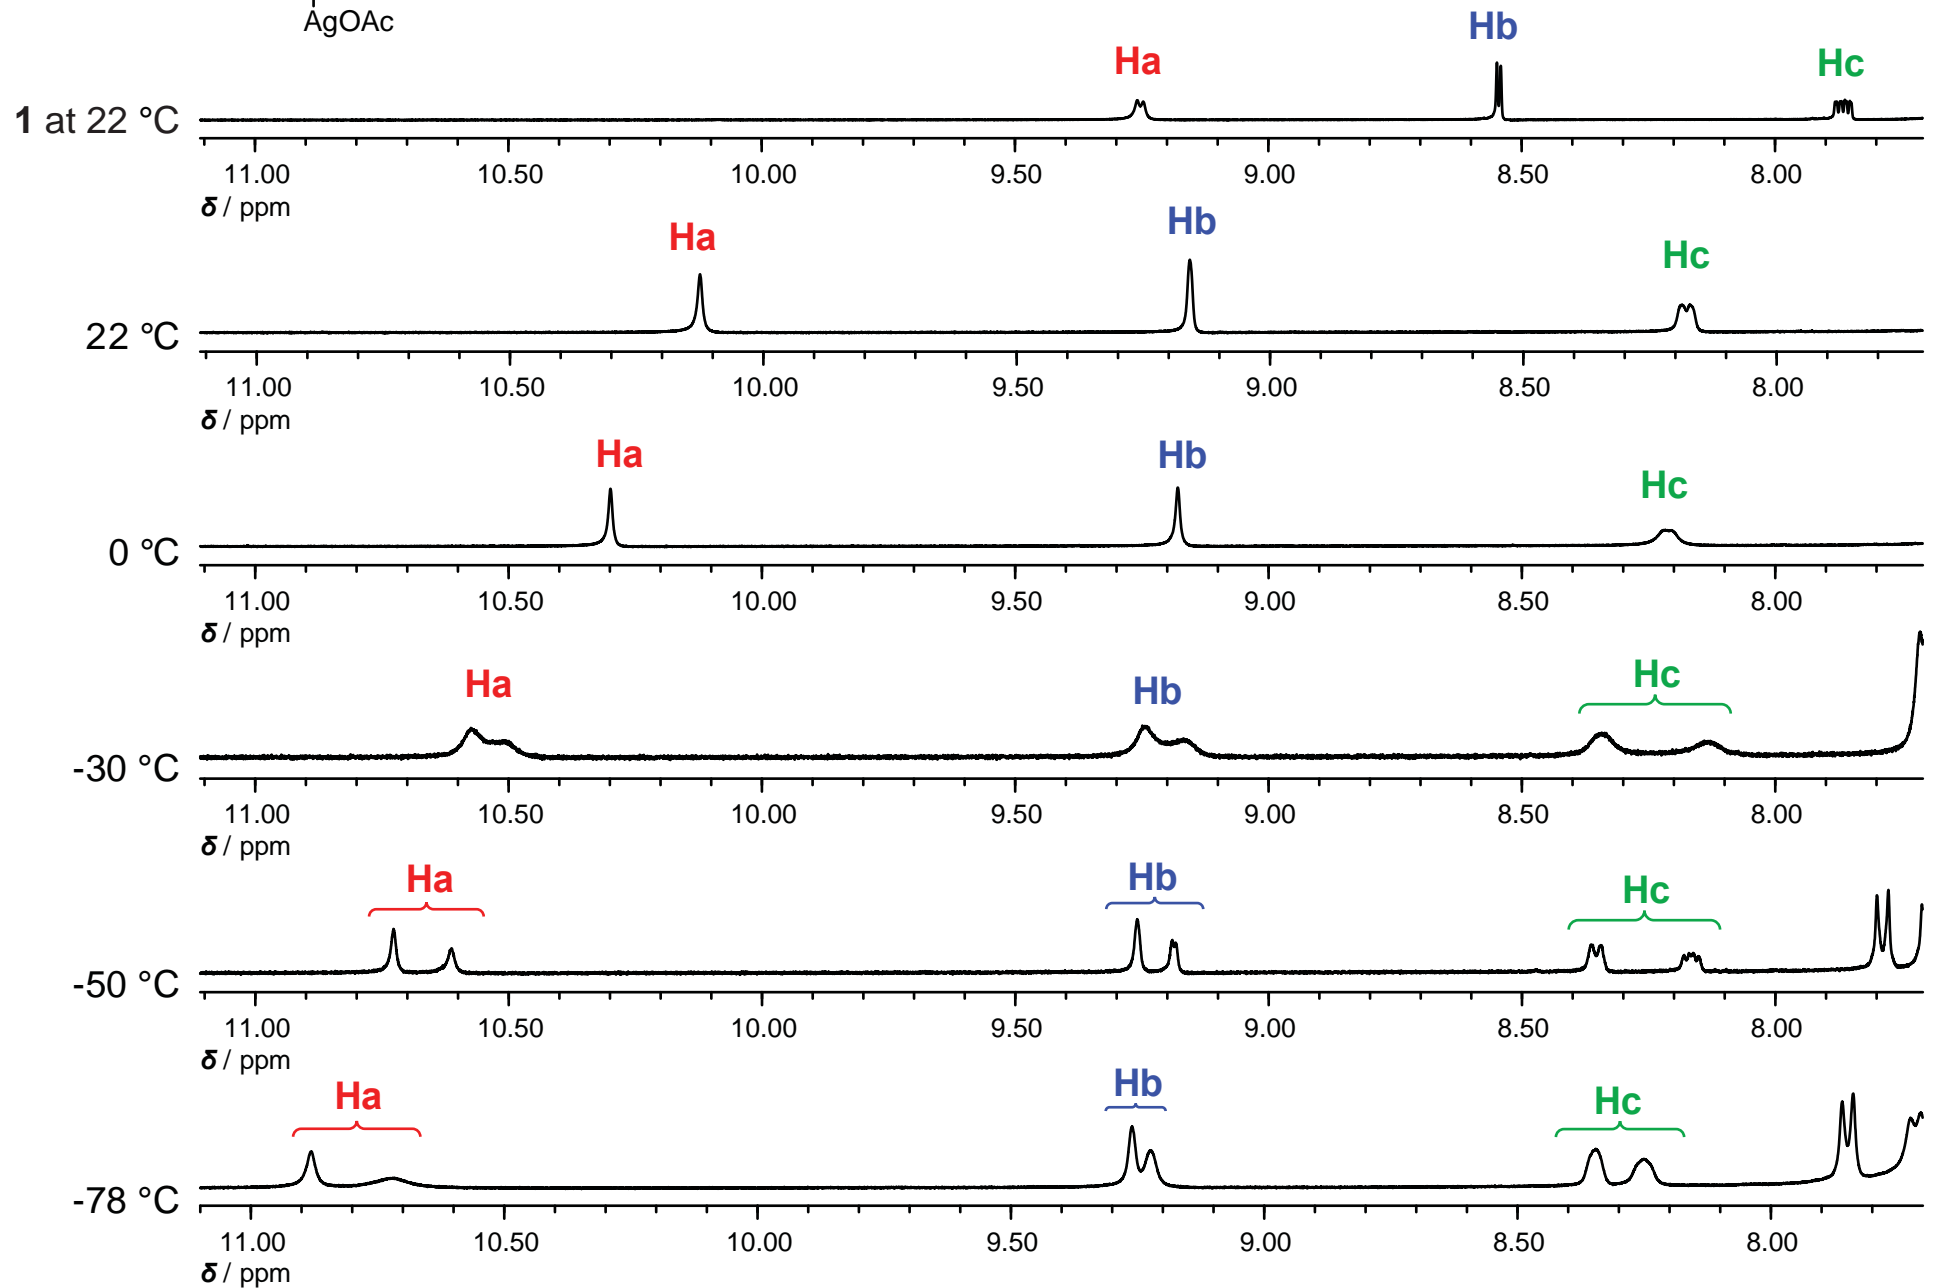

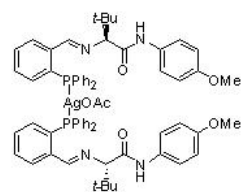**12**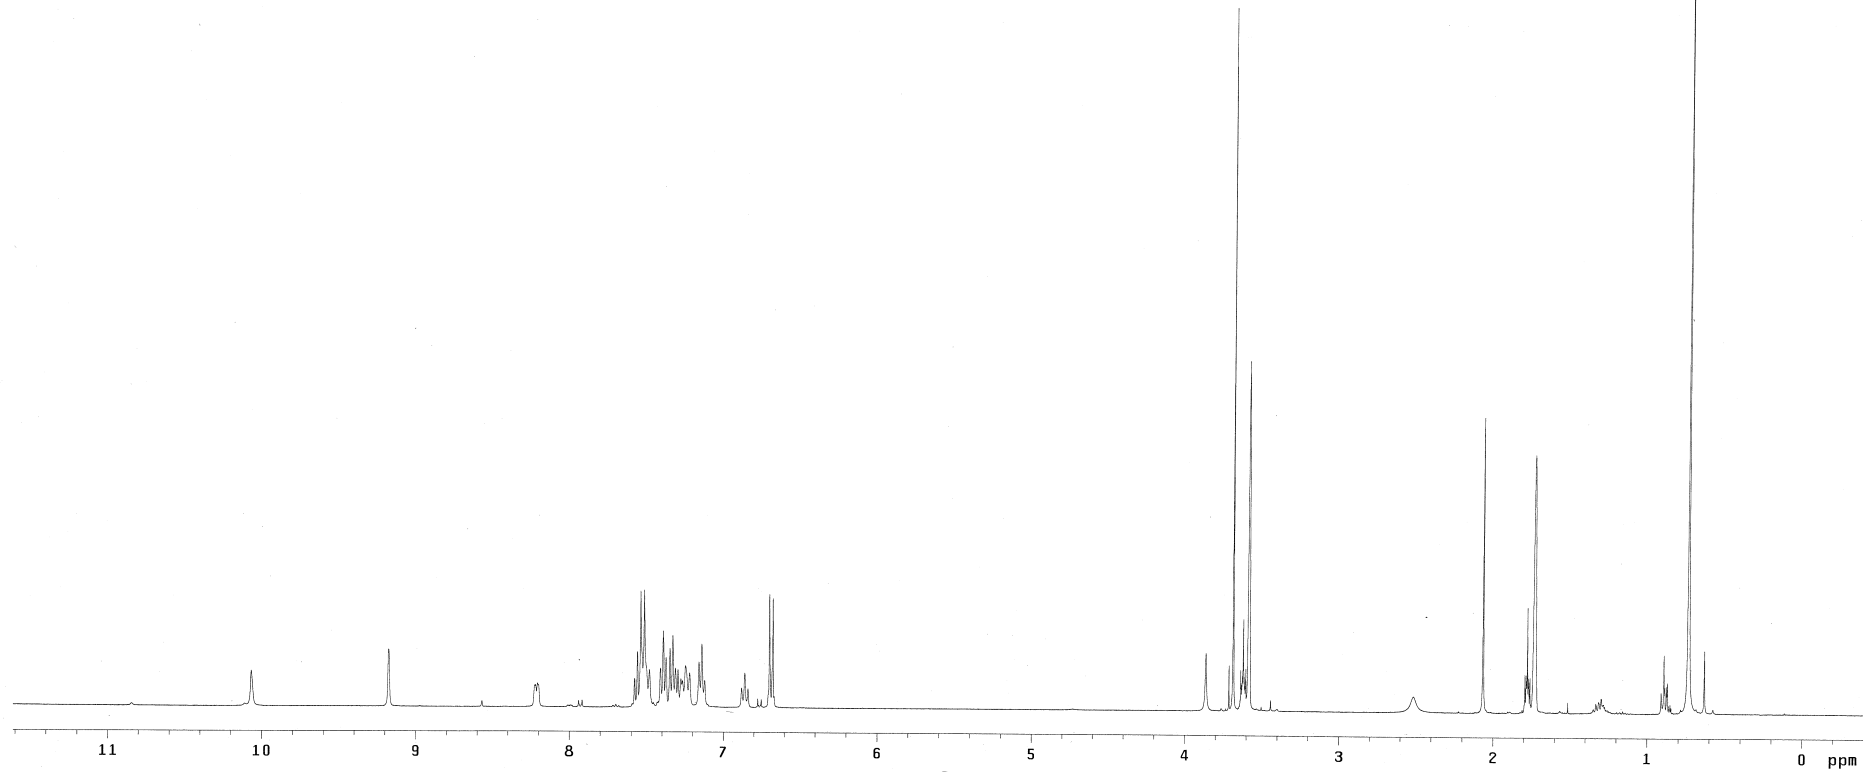



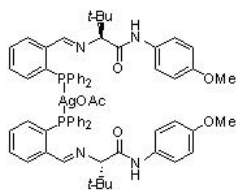

12

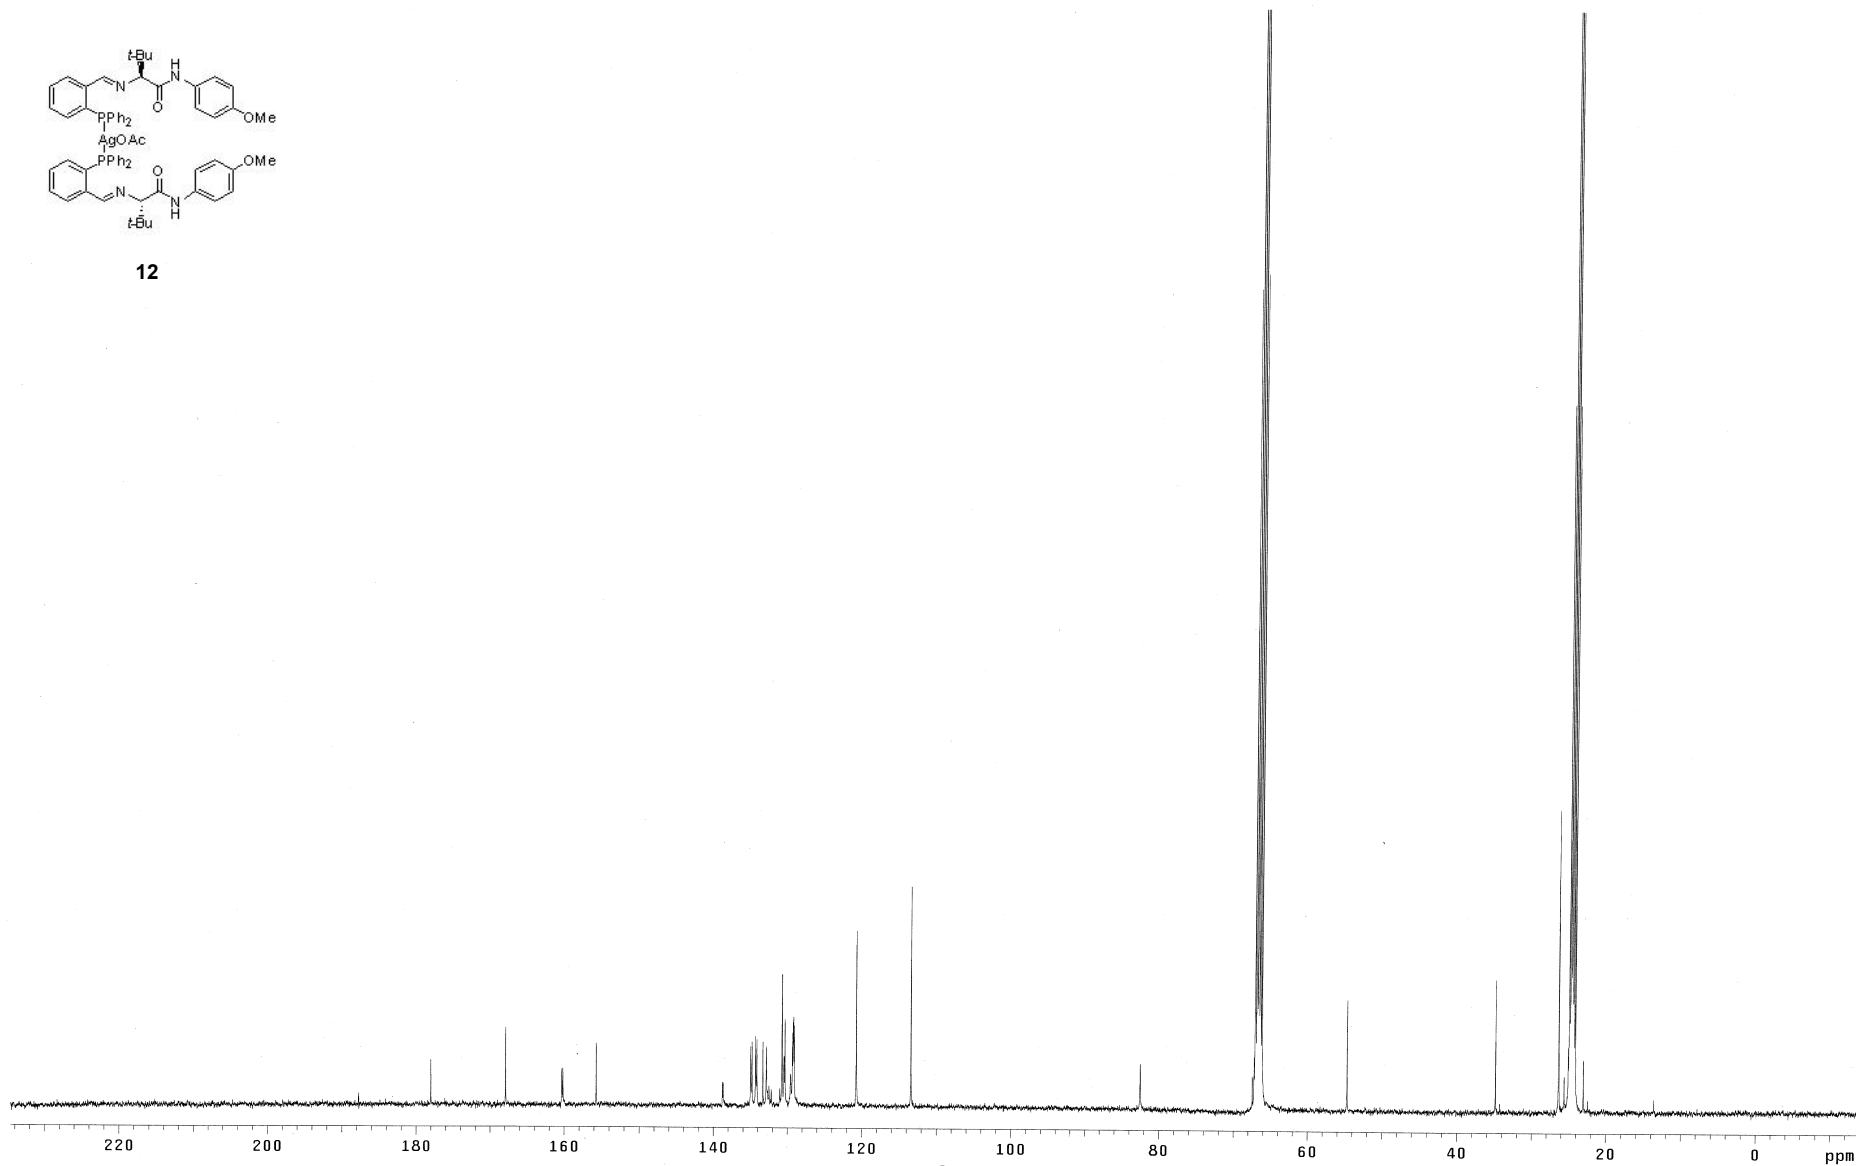

400 MHz  $^1\text{H}$  NMR spectra of **12** in  $d_8$ -THF at various temperatures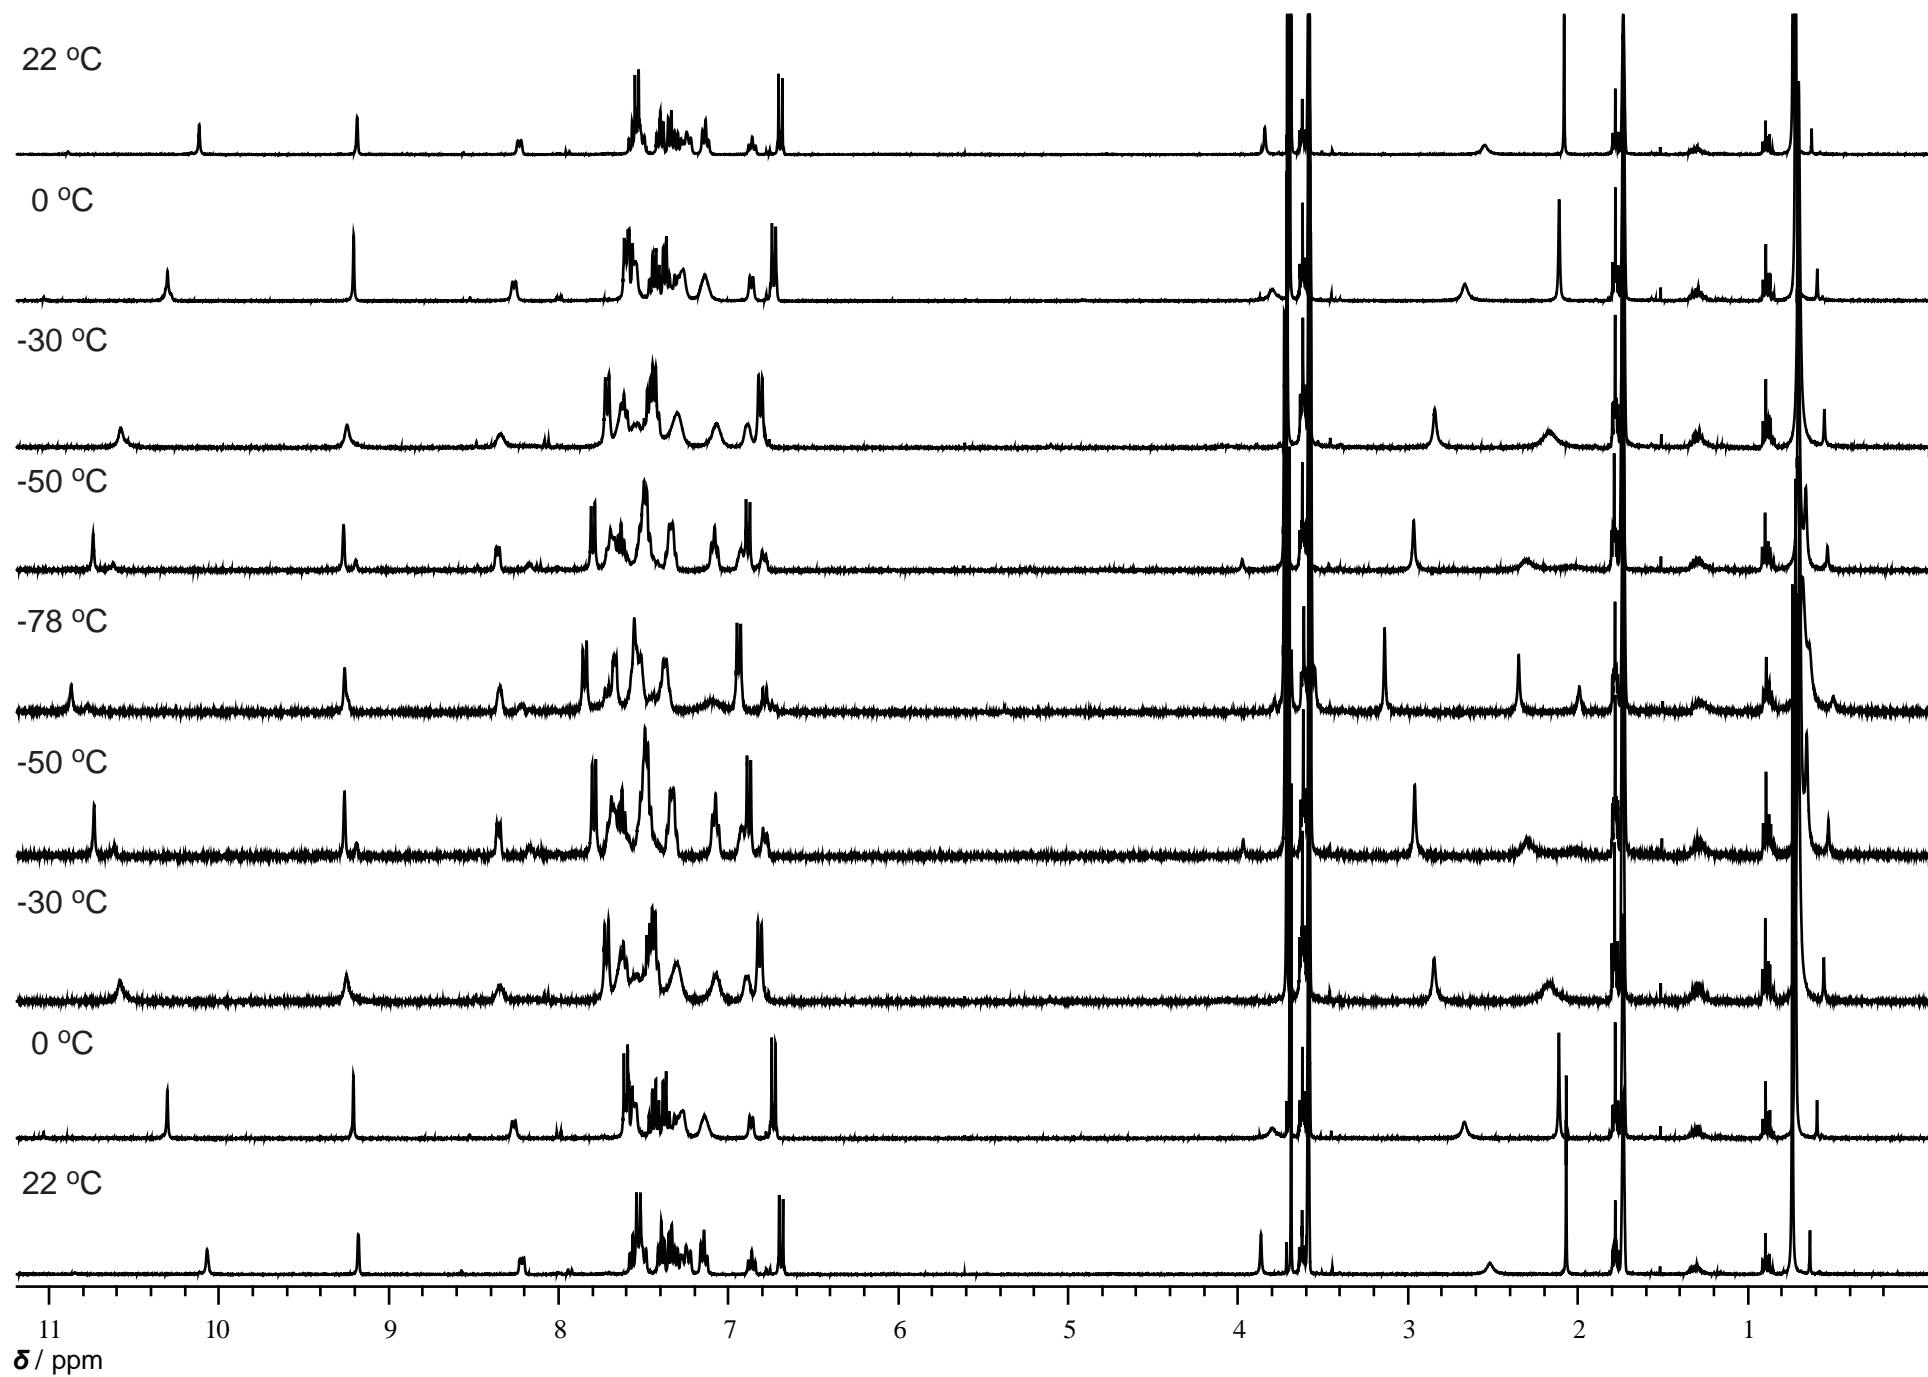

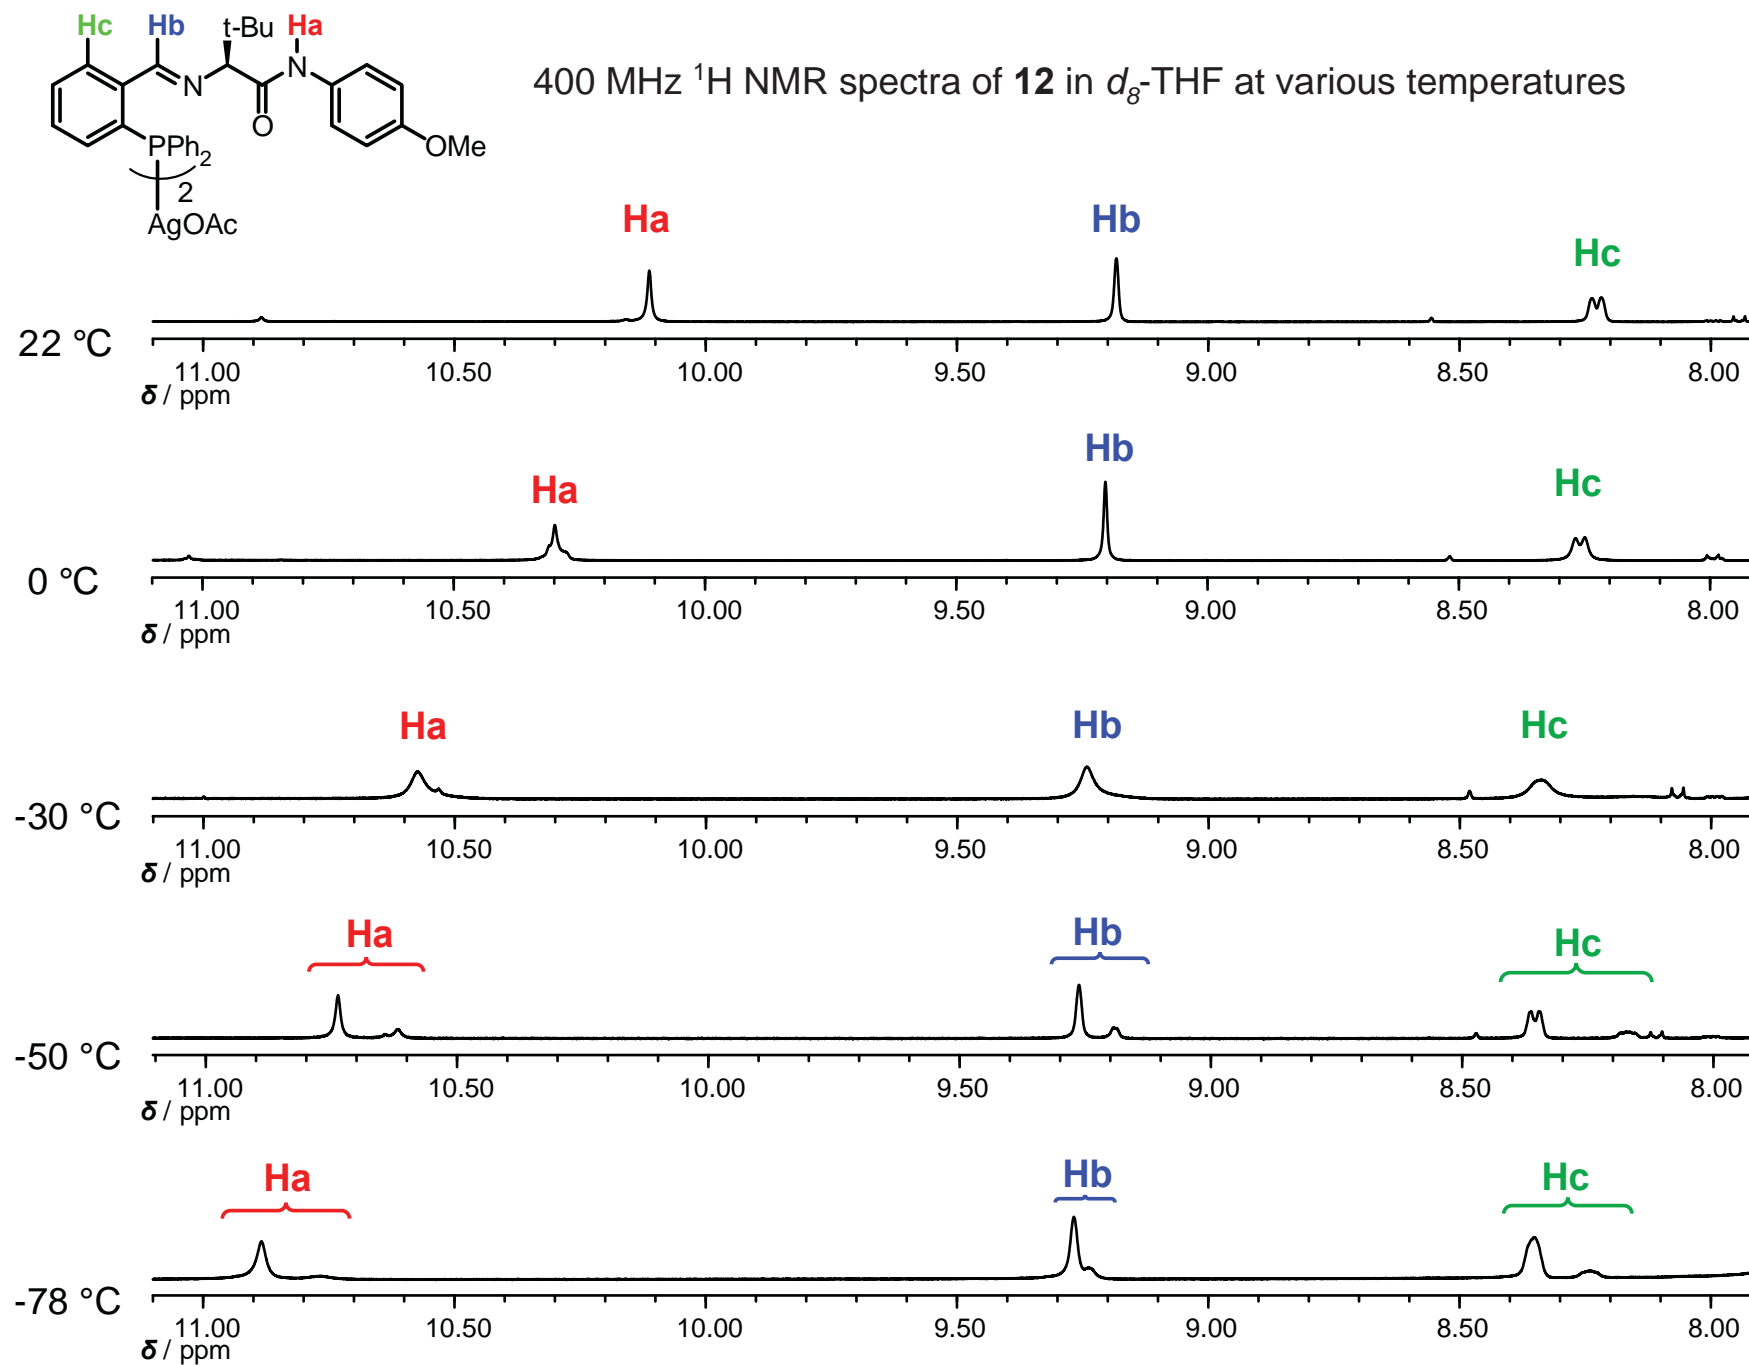

162 MHz  $^{31}\text{P}$  NMR spectrum of **12** at 22 °C

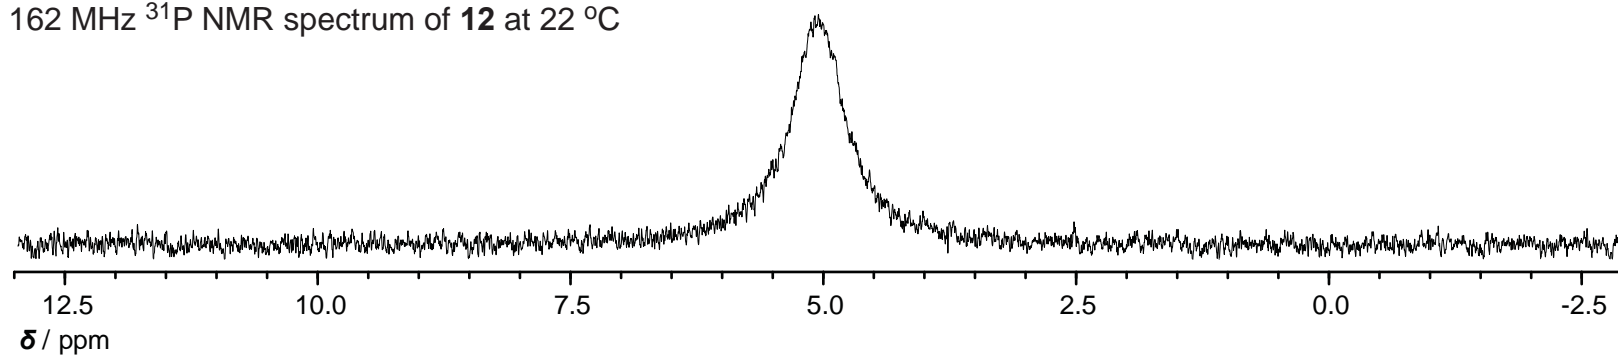

162 MHz  $^{31}\text{P}$  NMR spectrum of **12** at -78 °C

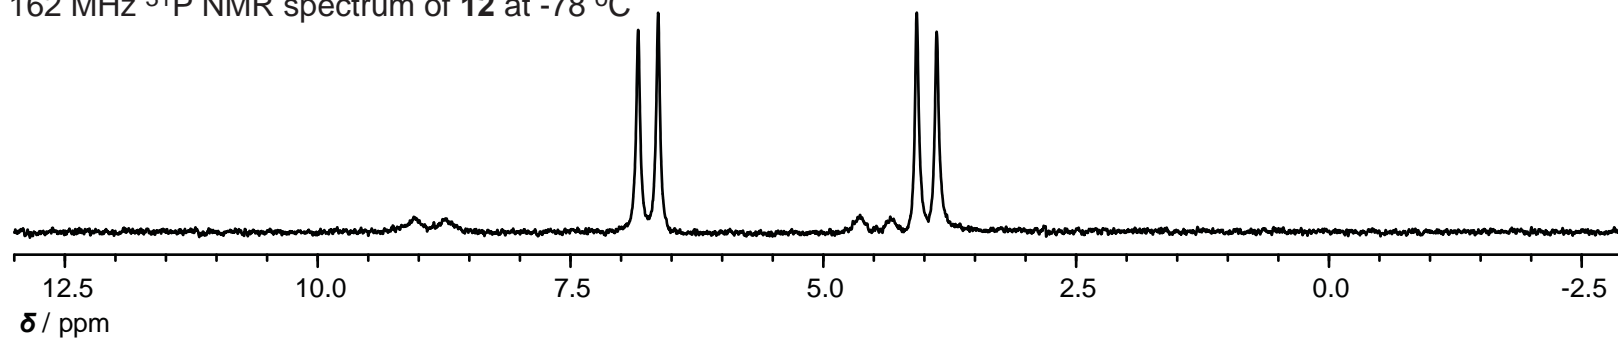

162 MHz  $^{31}\text{P}$  NMR spectrum of **12**  
+ 1 equiv AgOAc at -78 °C

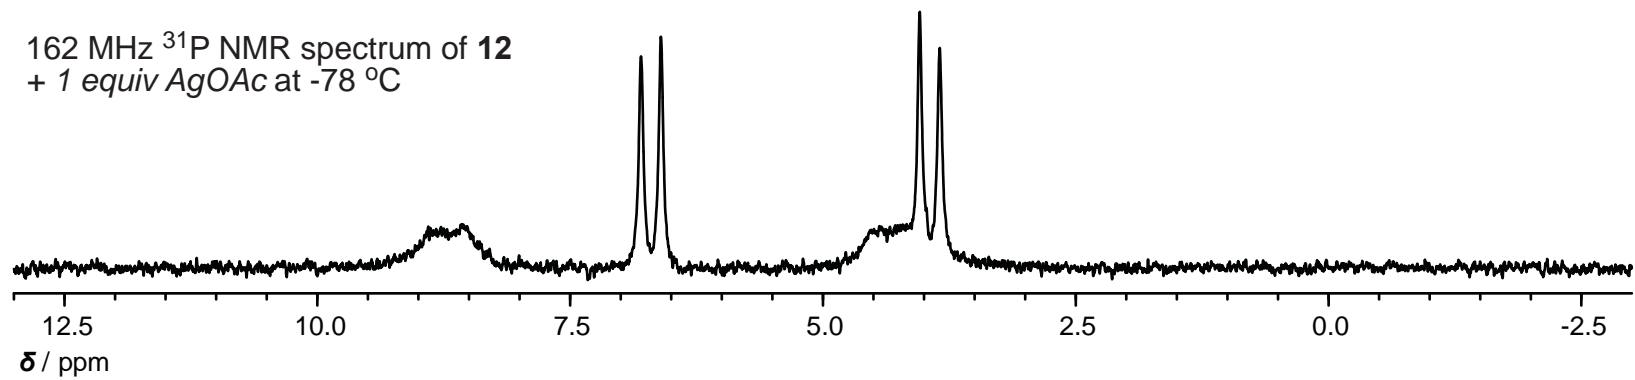

400 MHz  $^1\text{H}$  NMR spectra of AgOAc-1 complexes in  $d_8$ -THF at  $-78\text{ }^\circ\text{C}$ 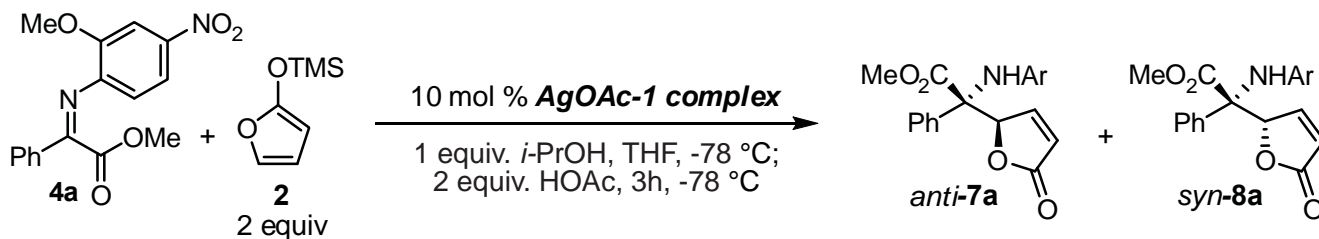

**dr (anti-7a:syn-8a),  
 %ee of anti-7a**

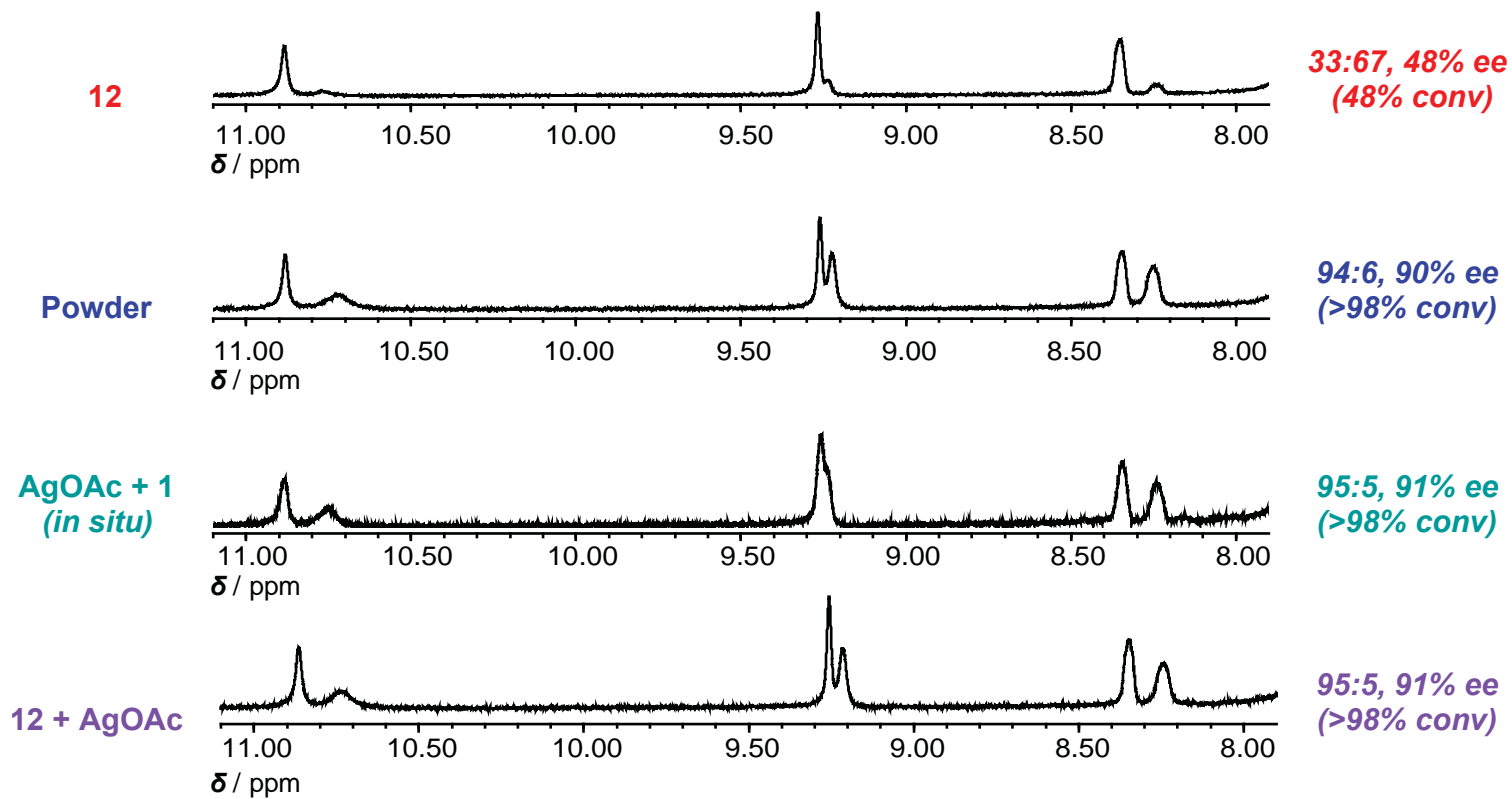

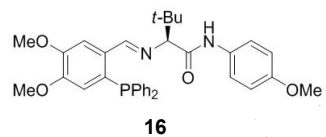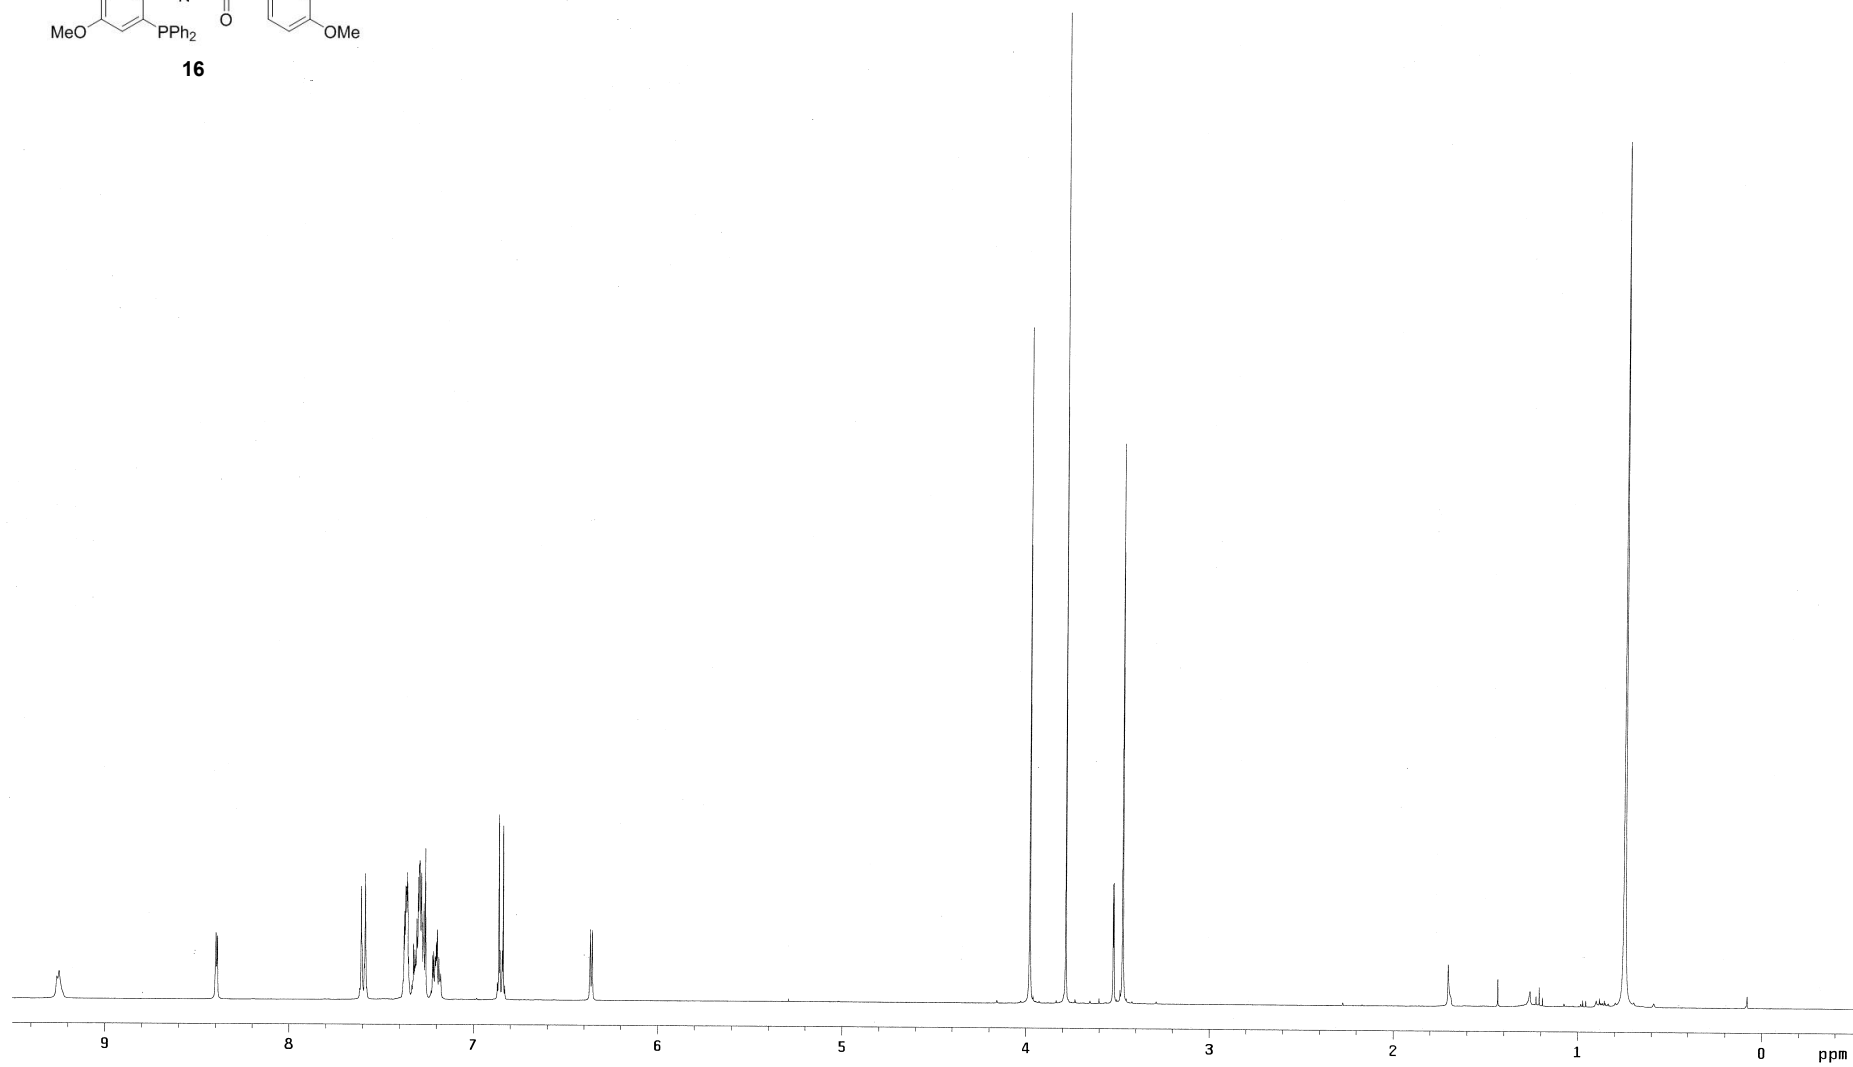

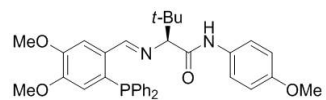

16

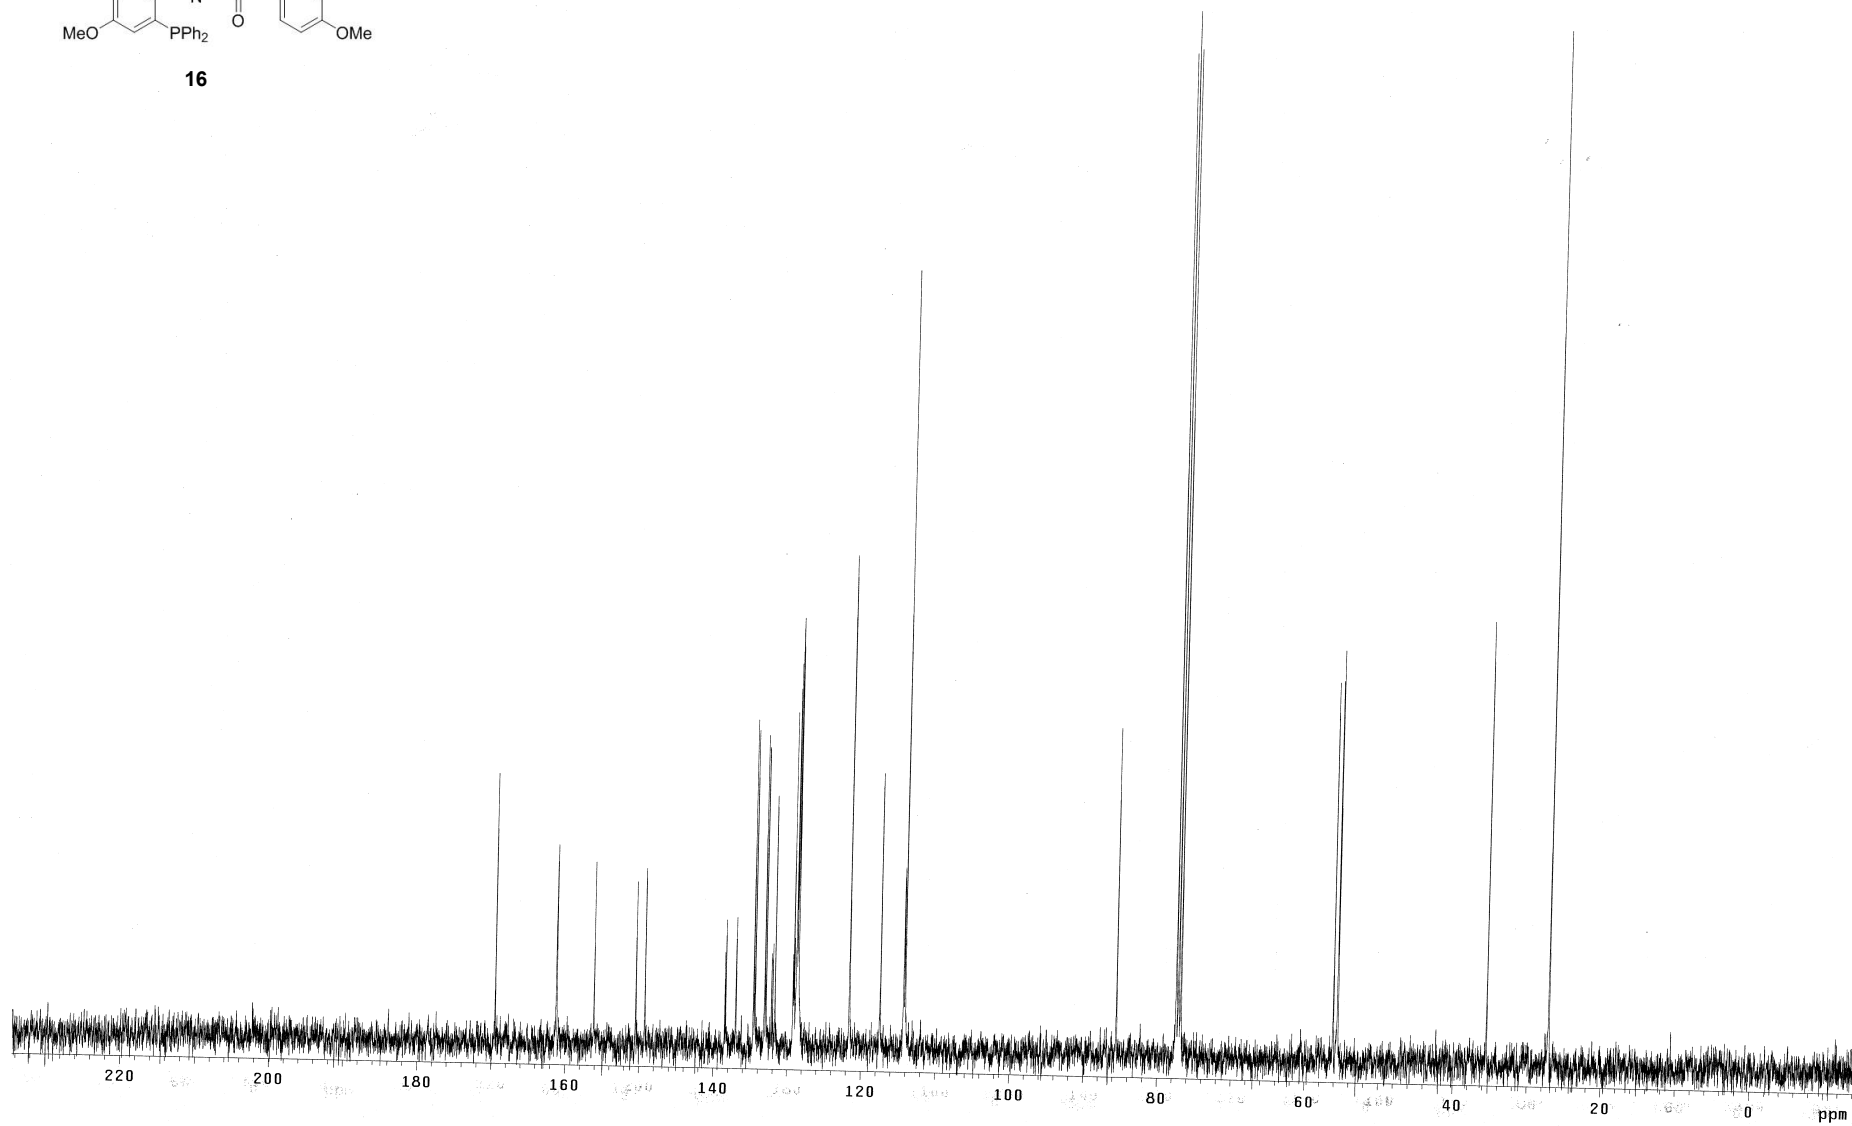

Supplement: NIHMS86754-supplement-2_si_002.pdf [file NIHMS86754-supplement-2_si_002.pdf]
