# Supplementary material
Source: PubMed Central journal article supplement (PMC2645437)
Supplement: NIHMS86754-supplement-1_si_001.pdf [file NIHMS86754-supplement-1_si_001.pdf]

**Ag-Catalyzed Diastereo- and Enantioselective Vinylogous  
Mannich Reactions of  $\alpha$ -Ketoimine Esters.  
Development of a Method and Investigation of its Mechanism**

Laura C. Wieland, Erika Vieira, Marc L. Snapper\*, and Amir H. Hoveyda\*

*Department of Chemistry, Merkert Chemistry Center, Boston College, Chestnut Hill, Massachusetts 02467*

**SUPPORTING INFORMATION, PART 1**

| <b><i>Table of Contents</i></b>                                                                         | <b><i>Page</i></b> |
|---------------------------------------------------------------------------------------------------------|--------------------|
| <i>General</i>                                                                                          | S2                 |
| <i>Analytical data for ketoimines 4a-m,15</i>                                                           | S2                 |
| <i>Representative procedure for Ag-catalyzed asymmetric vinylogous Mannich reactions</i>                | S5                 |
| <i>Analytical data for Mannich products 7a, 8a, 7b-h, 8i, 7j-m, 17, 18</i>                              | S5                 |
| <i>Analytical data for ligand 16</i>                                                                    | S17                |
| <i>Procedures and analytical data for unprotected amine product and reduction products 10a, 10m, 11</i> | S18                |
| <i>Procedure and analytical data for 1-Ag complexes</i>                                                 | S20                |
| <i>X-ray Crystallographic Data for <math>\alpha</math>-ketoimine ester 4a</i>                           | S21                |
| <i>X-ray Crystallographic Data for 10m</i>                                                              | S31                |
| <i>X-ray Crystallographic Data for 1-Ag complex 10</i>                                                  | S42                |
| <i>X-ray Crystallographic Data for 17</i>                                                               | S66                |

**General.** Infrared (IR) spectra are recorded on a Perkin Elmer 781 spectrophotometer,  $\nu_{\max}$  in  $\text{cm}^{-1}$ . Bands are characterized as broad (br), strong (s), medium (m) or weak (w).  $^1\text{H}$  NMR spectra are recorded on a Varian Unity INOVA 400 (400 MHz) spectrometer. Chemical shifts are reported in ppm from tetramethylsilane with the solvent resonance resulting from incomplete deuteration as the internal standard ( $\text{CDCl}_3$ ;  $\delta$  7.26). Data are reported as follows: chemical shift, integration, multiplicity (s = singlet, d = doublet, t = triplet, q = quartet, br = broad, m = multiplet), and coupling constants.  $^{13}\text{C}$  NMR spectra are recorded on a Varian Unity INOVA 400 (100 MHz) with complete proton decoupling. Chemical shifts are reported in ppm from tetramethylsilane with the solvent resonance as the internal standard ( $\text{CDCl}_3$ ;  $\delta$  77.16 ppm).  $^{31}\text{P}$  NMR spectra are recorded on a Varian Unity INOVA 400 (162 MHz) with complete proton decoupling. Chemical shifts are reported in ppm ( $\text{H}_3\text{PO}_4$ ;  $\delta$  0.00 ppm). Enantiomeric ratios were determined by analytical liquid chromatography (HPLC) Shimadzu chromatograph (Chiral Technologies Chiralpak AS (4.6 x 250 mm), Chiral Technologies Chiralcel OD (4.6 x 250 mm) or Chiral Technologies Chiralpak AD (4.6 x 250 mm)) in comparison with authentic racemic materials. High-resolution mass spectrometry is performed on a Micromass LCT ESI-MS (positive mode) at the Mass Spectrometry Facility (Boston College). Optical rotation values are recorded on a Rudolph Research Analytical Autopol IV polarimeter. Unless otherwise stated, all reactions are conducted under an inert atmosphere of nitrogen. Tetrahydrofuran is purified by distillation from sodium benzophenone ketal immediately prior to use. All work-up and purification procedures are carried out with reagent solvents in air. All solvents are purchased from Doe and Ingalls. 2-(Trimethylsilyloxy)furan and  $\text{AgOAc}$  were purchased from Aldrich and used as received.  $\alpha$ -Ketoesters were purchased from commercial sources or synthesized from commercially available starting materials through known methods.<sup>1</sup> The corresponding ketoimines are synthesized using known methods.<sup>2</sup>  $\text{EDC}\cdot\text{HCl}$ ,  $\text{HOBT}\cdot\text{H}_2\text{O}$ , trifluoroacetic acid, *p*-anisidine, Boc-protected amino acids and 2-(diphenylphosphino)benzaldehyde are purchased from commercial sources and used without further purification. Phosphino amino-acid based ligand **1** was prepared as previously reported.<sup>3</sup>

#### **Analytical Data for Substrates 4a-m, 15:**

**4a:** 10:1 mixture of *E/Z* isomers. mp = 106–107 °C. IR (neat): 3101 (w), 3008 (w), 2945 (w), 2911 (w), 2865 (w, br), 2835 (w), 1729 (s), 1623 (s), 1585 (s), 1514 (s), 1484 (m), 1451 (m), 1409 (m), 1350 (s), 1336 (m), 1303 (s), 1260 (s), 1231 (s), 1181 (m), 1096 (m), 1020 (m), 1007 (m), 797 (m), 687 (m)  $\text{cm}^{-1}$ .  $^1\text{H}$  NMR (400 MHz,  $\text{CDCl}_3$ , major isomer):  $\delta$  7.90 (2H, d,  $J = 7.3$

(1) a) Wasserman, H. H.; Ho, W. B. *J. Org. Chem.* **1994**, 59, 4364–4366; b) Babudri, F.; Fiandanese, V.; Marchese, G.; Punzi, A. *Tetrahedron* **1996**, 52, 13513–13520; c) Rodriguez, A.; Nomen, M.; Spur, B. W. *Tetrahedron Lett.* **1998**, 39, 8563–8566; d) Domagala, J. M. *Tetrahedron Lett.* **1980**, 21, 4997–5000.

(2) (a) Palacios, F.; Vicario, J.; Aparicio, D. *J. Org. Chem.* **2006**, 71, 7690–7696; b) Niwa, Y.; Shimizu, M. *J. Am. Chem. Soc.* **2003**, 125, 3720–3721.

(3) Carswell, E. L.; Snapper, M. L.; Hoveyda, A. H. *Angew. Chem. Int., Ed.* **2006**, 45, 7230–7233.

Hz), 7.85 (1H, dd,  $J = 8.8, 2.2$  Hz), 7.77 (1H, d,  $J = 2.2$  Hz), 7.55 (1 H, t,  $J = 7.3$  Hz), 7.48 (2H, t,  $J = 7.3$  Hz), 6.89 (1H, d,  $J = 8.4$  Hz), 3.89 (3H, s), 3.66 (3H, s).  $^{13}\text{C}$  NMR (100 MHz,  $\text{CDCl}_3$ ):  $\delta$  164.1, 161.8, 150.1, 145.9, 145.6, 133.3, 132.8, 129.1, 128.8, 119.5, 117.0, 106.7, 56.5, 52.4. HRMS Calcd for  $\text{C}_{16}\text{H}_{15}\text{N}_2\text{O}_5$  (M + H): 315.09810; Found: 315.09849.

**4b:** 5:1 mixture of *E/Z* isomers. mp = 104–105 °C. IR (neat): 3084 (w, br), 3008 (w, br), 2957 (w, br), 2839 (w, br), 1742 (s), 1641 (m), 1585 (m), 1523 (s), 1354 (s), 1320 (m), 1253 (s), 1096 (m), 1028 (m), 796 (m), 670 (m)  $\text{cm}^{-1}$ .  $^1\text{H}$  NMR (400 MHz,  $\text{CDCl}_3$ , major isomer):  $\delta$  7.86 (1H, dd,  $J = 8.4, 2.0$  Hz), 7.77 (1H, d,  $J = 2.0$  Hz), 7.51 (1H, s), 7.38 (2 H, d,  $J = 4.8$  Hz), 7.13-7.08 (1H, m), 6.90 (1H, d,  $J = 8.4$  Hz), 3.91 (3H, s), 3.87 (3H, s), 3.66 (3H, s).  $^{13}\text{C}$  NMR (100 MHz,  $\text{CDCl}_3$ ):  $\delta$  164.0, 161.7, 160.2, 150.1, 145.9, 145.6, 134.6, 130.0, 121.7, 119.5, 119.3, 117.0, 112.8, 106.7, 56.5, 55.7, 52.4. HRMS Calcd for  $\text{C}_{17}\text{H}_{17}\text{N}_2\text{O}_6$  (M + H): 345.10866; Found: 345.10892.

**4c:** 13:1 mixture of *E/Z* isomers. mp = 106–108 °C. IR (neat): 3111 (w, br), 3015 (w), 2955 (w), 2843 (w), 1725 (s), 1615 (s), 1579 (s), 1507 (s), 1487 (m), 1450 (m), 1412 (m), 1342 (s), 1318 (s), 1276 (m), 1250 (s), 1223 (s), 1175 (s), 1091 (m), 1024 (s), 938 (m), 866 (m), 830 (m), 794 (m), 714 (m), 682 (m), 665 (m)  $\text{cm}^{-1}$ .  $^1\text{H}$  NMR (400 MHz,  $\text{CDCl}_3$ , major isomer):  $\delta$  7.94 (1H, s), 7.87 (1H, dd,  $J = 8.4, 2.2$  Hz), 7.78 (1H, d,  $J = 2.2$  Hz), 7.74 (1 H, d,  $J = 7.7$  Hz), 7.53 (1H, d,  $J = 8.4$  Hz), 7.42 (1H, t,  $J = 8.4$  Hz), 6.89 (1H, d,  $J = 8.4$  Hz), 3.91 (3H, s), 3.67 (3H, s).  $^{13}\text{C}$  NMR (100 MHz,  $\text{CDCl}_3$ ):  $\delta$  163.5, 160.4, 150.0, 145.8, 145.4, 135.3, 135.1, 132.7, 130.3, 128.6, 127.1, 119.4, 117.0, 106.7, 56.5, 52.6. HRMS Calcd for  $\text{C}_{16}\text{H}_{14}\text{ClN}_2\text{O}_5$  (M + H): 349.05912; Found: 349.05871.

**4d:** 10:1 mixture of *E/Z* isomers. mp = 154–155 °C. IR (neat): 3352 (w), 3088 (w), 3007 (w), 2971 (w), 2834 (w), 2657 (w, br), 1732 (s), 1626 (s), 1581 (s), 1566 (m), 1505 (s), 1489 (m), 1462 (m), 1400 (m), 1309 (s), 1253 (m), 1224 (s), 1176 (m), 1123 (m), 1091 (m), 1069 (m), 1028 (m), 1005 (m), 859 (m), 687 (m)  $\text{cm}^{-1}$ .  $^1\text{H}$  NMR (400 MHz,  $\text{CDCl}_3$ , major isomer):  $\delta$  7.86 (1H, dd,  $J = 8.4, 2.2$  Hz), 7.78-7.76 (3H, m), 7.63 (2H, d,  $J = 8.8$  Hz), 6.88 (1H, d,  $J = 8.4$  Hz), 3.90 (3H, s), 3.66 (3H, s).  $^{13}\text{C}$  NMR (100 MHz,  $\text{CDCl}_3$ ):  $\delta$  163.6, 160.5, 150.0, 145.7, 145.6, 139.1, 131.9, 130.2, 129.3, 119.4, 117.0, 106.7, 56.5, 52.6. HRMS Calcd for  $\text{C}_{16}\text{H}_{14}\text{BrN}_2\text{O}_5$  (M + H): 393.00861; Found: 393.00875.

**4e:** 10:1 mixture of *E/Z* isomers. mp = 166–169 °C. IR (neat): 3070 (w), 3004 (w), 2959 (w), 2915 (w), 2833 (w, br), 2655 (w), 1730 (s), 1624 (m), 1579 (m), 1504 (s), 1487 (m), 1462 (m), 1395 (m), 1309 (s), 1251 (m), 1223 (s), 1175 (s), 1123 (m), 1092 (m), 1056 (m), 1026 (m), 1001 (s), 859 (m), 841 (m), 829 (m), 794 (m), 743 (m), 721 (m)  $\text{cm}^{-1}$ .  $^1\text{H}$  NMR (400 MHz,  $\text{CDCl}_3$ , major isomer):  $\delta$  7.88-7.84 (3H, m), 7.78 (1H, d,  $J = 2.2$  Hz), 7.62 (2H, d,  $J = 8.4$  Hz), 6.88 (1 H, d,  $J = 8.4$  Hz), 3.90 (3H, s), 3.66 (3H, s).  $^{13}\text{C}$  NMR (100 MHz,  $\text{CDCl}_3$ ):  $\delta$  163.6, 160.9, 150.0,

145.7, 145.6, 138.3, 132.9, 130.2, 119.4, 117.0, 106.8, 100.2, 56.5, 52.5. HRMS Calcd for  $C_{16}H_{14}IN_2O_5$  (M + H): 440.99474; Found: 440.99559.

**4f:** 10:1 mixture of *E/Z* isomers. mp = 148–151 °C. IR (neat): 3101 (w), 3006 (w, br), 2866 (w), 2835 (w), 1730 (s), 1601 (m), 1578 (m), 1561 (m), 1488 (s), 1410 (m), 1312 (s), 1231 (m), 1191(m), 1173 (m), 1128 (m), 1091 (m), 1022 (m), 1005 (m), 873 (m), 843 (m), 793 (m), 736 (m), 536 (m)  $cm^{-1}$ .  $^1H$  NMR (400 MHz,  $CDCl_3$ , major isomer):  $\delta$  7.87-7.77 (4H, m), 7.51 (2H, d,  $J = 8.1$  Hz), 6.88 (1H, d,  $J = 8.4$  Hz), 3.90 (3H, s), 3.66 (3H, s), 1.35 (9H, s).  $^{13}C$  NMR (100 MHz,  $CDCl_3$ ):  $\delta$  164.2, 161.6, 156.6, 150.2, 146.2, 145.4, 130.6, 128.7, 126.1, 119.5, 117.0, 106.7, 56.5, 52.3, 35.3, 31.3. HRMS Calcd for  $C_{20}H_{23}N_2O_5$  (M + H): 371.16070; Found: 371.16194.

**4g:** 11:1 mixture of *E/Z* isomers. mp = 128–130 °C. IR (neat): 3118(w), 3012 (w), 2958 (w), 2839 (w), 2653 (w, br), 2514 (w), 1742 (s), 1641 (s), 1582 (s), 1523 (s), 1489 (m), 1464 (m), 1417 (m), 1328 (s), 1316 (m), 1256 (s), 1223 (s), 1181 (m), 1131 (m), 1067 (m), 1028 (m), 1007 (m), 910 (m), 873 (m), 856 (m), 801 (m), 742 (m)  $cm^{-1}$ .  $^1H$  NMR (400 MHz,  $CDCl_3$ , major isomer):  $\delta$  8.02 (2H, d,  $J = 8.4$  Hz), 7.86 (1H, dd,  $J = 8.4, 2.0$  Hz), 7.78 (1H, d,  $J = 2.0$  Hz), 7.73 (2H, d,  $J = 8.4$  Hz), 6.90 (1H, d,  $J = 8.4$  Hz), 3.90 (3H, s), 3.69 (3H, s).  $^{13}C$  NMR (100 MHz,  $CDCl_3$ ):  $\delta$  163.3, 160.4, 149.8, 145.9, 145.3, 136.6, 133.5 (q,  $J = 32.6$  Hz), 129.2, 125.9 (q,  $J = 3.8$  Hz), 123.9 (q,  $J = 217$  Hz), 119.4, 117.0, 106.8, 56.5, 52.6. HRMS Calcd for  $C_{17}H_{14}F_3N_2O_5$  (M + H): 383.08548; Found: 383.08515.

**4h:** 20:1 mixture of *E/Z* isomers. mp = 128–129 °C. IR (neat): 3109 (w), 3063 (w), 3017 (w), 2953 (w), 2854 (w, br), 2839 (w), 1742 (s), 1619 (s), 1582 (s), 1518 (s), 1493 (m), 1468 (m), 1412 (m), 1350 (s), 1312 (m), 1257 (s), 1223 (m), 1168 (m), 1126 (m), 1096 (m), 1033 (m), 1016 (m), 868 (m), 797 (m), 733 (m)  $cm^{-1}$ .  $^1H$  NMR (400 MHz,  $CDCl_3$ , major isomer):  $\delta$  8.25 (1H, s), 8.12 (1H, dd,  $J = 8.6, 1.4$  Hz), 7.94-7.87 (4H, m), 7.80 (1H, d,  $J = 2.0$  Hz), 7.61-7.53 (2H, m), 6.95 (1H, d,  $J = 8.4$  Hz), 3.91 (3H, s), 3.72 (3H, s).  $^{13}C$  NMR (100 MHz,  $CDCl_3$ ):  $\delta$  164.2, 161.8, 150.2, 146.1, 145.6, 135.5, 132.9, 130.8, 129.5, 129.1, 128.7, 128.1, 127.2, 124.1, 119.5, 117.0, 106.8, 56.5, 52.5. HRMS Calcd for  $C_{20}H_{17}N_2O_5$  (M + H): 365.11375; Found: 365.11481.

**4i:** 5:1 mixture of *E/Z* isomers. mp = 102–106 °C. IR (neat): 3097 (w), 3012 (w), 2953 (w), 2939 (w), 1738 (s), 1653 (m), 1581 (m), 1518 (s), 1489 (m), 1463 (m), 1409 (m), 1354 (s), 1253 (s), 1215 (m), 1092 (m), 1058 (m), 1025 (m), 915 (m), 860 (m), 810 (m), 742 (m), 645 (m)  $cm^{-1}$ .  $^1H$  NMR (400 MHz,  $CDCl_3$ , major isomer):  $\delta$  7.77 (1H, dd,  $J = 8.8, 2.4$  Hz), 7.63 (1H, d,  $J = 2.4$  Hz), 7.53 (1H, dd,  $J = 8.0, 1.6$  Hz), 7.21-7.13 (2H, m), 6.93 (1H, dd,  $J = 7.2, 2.0$  Hz), 6.81 (1H, d,  $J = 8.4$  Hz), 3.97 (3H, s), 3.84 (3H, s).  $^{13}C$  NMR (100 MHz,  $CDCl_3$ ):  $\delta$  163.2, 162.4, (161.5), (161.2), 149.0, (148.3), 145.9, (145.4), 144.1, (137.2), 135.2, (133.3), 132.8, (132.4), (132.0),

131.5, 129.2, (128.0), 127.4, (122.3), 121.4, 119.4, (117.2), 116.8, (106.8), 106.7, (56.5), 56.3, 53.9, (53.0). HRMS Calcd for  $C_{16}H_{14}N_2O_5Br$  (M + H): 393.00861; Found: 393.01005.

**4j:** 2.5:1 mixture of *E/Z* isomers. mp = 98–100 °C. IR (neat): 3147 (w), 3118 (w), 2953 (w), 2835 (w), 1742 (s), 1628 (m), 1518 (s), 1472 (s), 1354 (s), 1337 (s), 1257 (s), 1239 (m), 1096 (m), 1045 (s), 1016 (m), 1155 (m), 805 (m), 762 (m)  $cm^{-1}$ .  $^1H$  NMR (400 MHz,  $CDCl_3$ , mixture of isomers):  $\delta$  7.84–7.81 (1 + [0.4]H, m), [7.72 (0.4H, s)], 7.71 (1H, m), 7.65 (1H, s), [7.28 (0.4H, s)], 7.12 (1H, d,  $J$  = 3.2 Hz), [7.03 (0.4H, d,  $J$  = 2.2 Hz)], 6.92 (1H, d,  $J$  = 8.8 Hz), [6.86 (0.4H, d,  $J$  = 8.4 Hz)], 6.56 (1H, t,  $J$  = 1.6 Hz), [6.41 (0.4H, s)], [3.97 (1.2H, s)], 3.84 (3H, s), [3.75 (1.2H, s)], 3.65 (3H, s).  $^{13}C$  NMR (100 MHz,  $CDCl_3$ , mixture of isomers):  $\delta$  [163.7], 161.8, 150.2, 149.5, 149.2, [148.6], [147.9], 147.5, [146.8], [146.5], [145.9], 145.4, 145.3, [145.1], [120.6], 120.3, 119.3, [118.8], [117.2], 117.1, 112.9, [112.5], 106.6, [106.6], 56.4, [56.4], [53.7], 52.7. HRMS Calcd for  $C_{14}H_{13}N_2O_6$  (M + H): 305.07736; Found: 305.07696.

**4k:** 8:1 mixture of *E/Z* isomers. mp = 153–154 °C. IR (neat): 3085 (w), 2960 (w), 2916 (w), 2848 (w), 1734 (s), 1617 (s), 1581 (m), 1511 (s), 1486 (m), 1465 (m), 1406 (m), 1345 (s), 1288 (m), 1226 (s), 1170 (s), 1125 (m), 1091 (m), 1023 (s), 860 (m), 803 (m), 731 (m), 687 (m)  $cm^{-1}$ .  $^1H$  NMR (400 MHz,  $CDCl_3$ , major isomer):  $\delta$  7.96 (1H, s), 7.86 (1H, dd,  $J$  = 8.4, 2.2 Hz), 7.77 (1H, d,  $J$  = 2.2 Hz), 7.69 (1H, d,  $J$  = 4.8 Hz), 7.42–7.38 (1H, m), 6.90 (1H, d,  $J$  = 8.8 Hz), 3.89 (3H, s), 3.65 (3H, s).  $^{13}C$  NMR (100 MHz,  $CDCl_3$ ):  $\delta$  163.5, 156.0, 149.7, 145.9, 145.4, 137.3, 131.8, 127.1, 127.0, 119.8, 117.1, 106.7, 56.4, 52.5. HRMS Calcd for  $C_{14}H_{13}N_2O_5S$  (M + H): 321.05452; Found: 321.05540.

**4m:** 11:1 mixture of *E/Z* isomers. mp=132–134 °C. IR (neat): 3354 (w), 3091 (w), 3009 (w), 2957 (w), 2835 (w, br), 1734 (s), 1629 (s), 1581 (s), 1507 (s), 1493 (m), 1461 (m), 1405 (m), 1339 (s), 1310 (m), 1253 (m), 1224 (s), 1176 (m), 1090 (s), 1029 (m), 1008 (m), 858 (m), 842 (m), 796 (m), 766 (m), 744 (m), 727 (m), 671 (m)  $cm^{-1}$ .  $^1H$  NMR (400 MHz,  $CDCl_3$ , major isomer):  $\delta$  7.85–7.77 (4H, m), 7.44 (2H, d,  $J$  = 8.4 Hz), 6.88 (1 H, d,  $J$  = 8.4 Hz), 3.89 (3H, s), 3.66 (3H, s).  $^{13}C$  NMR (100 MHz,  $CDCl_3$ ):  $\delta$  163.6, 160.6, 149.9, 145.7, 145.6, 132.32, 132.26, 130.2, 127.7, 119.4, 117.0, 106.7, 56.5, 52.5. HRMS Calcd for  $C_{16}H_{14}ClN_2O_5$  (M + H): 349.05912; Found: 349.05911.

**15:** IR (neat): 3001 (w), 2951 (w), 2837 (w), 1722 (s), 1656 (m), 1591 (m), 1506 (m), 1489 (s), 1454 (m), 1436 (m), 1367 (w), 1314 (m), 1275 (m), 1244 (s), 1224 (m), 1193 (m), 1138 (s), 1113 (s), 944 (m), 853 (m), 812 (m), 77 (m), 744 (s)  $cm^{-1}$ .  $^1H$  NMR (400 MHz,  $CDCl_3$ ), major isomer:  $\delta$  7.05 (1H, ddd,  $J$  = 7.6, 7.6, 1.6 Hz), 6.90–6.85 (2H, m), 6.89 (1H, dd,  $J$  = 7.6, 1.6 Hz), 3.85 (3H, s), 3.72 (3H, s), 1.98 (3H, s).  $^{13}C$  NMR (100 MHz,  $CDCl_3$ ):  $\delta$  165.2, 162.1, 148.3, 138.1, 126.0, 120.9, 120.2, 111.6, 55.7, 53.2, 17.6. HRMS Calcd for  $C_{11}H_{14}NO_3$ : 208.09737; Found: 208.09785.

**Representative experimental procedure for gram-scale Ag-catalyzed addition of vinyllogous silyl enol ether 2 to an  $\alpha$ -ketoimine ester:** A flame-dried 100 mL round bottom flask was charged with AgOAc (117 mg, 0.700 mmol), **1** (320 mg, 0.636 mmol), and **4a** (2.00 g, 6.36 mmol). The flask was sealed with a septum and purged with a N<sub>2</sub> atmosphere. Freshly distilled THF was added (64 mL) through a syringe, followed by *i*-PrOH (487  $\mu$ L, 0.636 mmol), and the resulting homogenous yellow solution was allowed to cool to  $-78$  °C (dry ice/acetone) with stirring. 2-Trimethylsiloxyfuran (**2**) (2.66 mL, 13.4 mmol) was added, and the resulting solution was kept at  $-78$  °C for 15 h before addition of HOAc (765  $\mu$ L, 13.4 mmol) in MeOH (10 mL). The resulting solution was allowed to stir at  $-78$  °C for an additional three hours, after which it was allowed to warm to 22 °C. A saturated aqueous solution of NaHCO<sub>3</sub> was added, after which the aqueous layer was washed with EtOAc (3 x 100 mL), dried over MgSO<sub>4</sub>, and the volatiles were removed *in vacuo*. The unpurified residue (typically yellow oil) was a 20:1 mixture of **7a**:**8a** by <sup>1</sup>H NMR analysis, which can be separated by silica gel chromatography (3:1 petroleum ether:EtOAc) to furnish pure **7a** as a yellow solid (2.24 g, 5.62 mmol, 88% yield, 92% ee of **7a**), which was recrystallized from MeOH to afford **7a** (yellow crystals) in >98% ee (1.53 g, 3.84 mmol, 68% yield, >98% ee).

**7a:** IR (neat): 3396 (w, br), 1791 (m), 1766 (s), 1595 (m), 1532 (m), 1501 (m), 1338 (m), 1293 (s), 1256 (m), 1231 (m), 1092 (m), 734 (m) cm<sup>-1</sup>. <sup>1</sup>H NMR (400 MHz, CDCl<sub>3</sub>):  $\delta$  7.62 (1H, d, *J* = 2.4 Hz), 7.52 (1H, ddd, *J* = 6.8, 2.4, 0.4 Hz), 7.50 (1H, dd, *J* = 5.8, 1.6 Hz), 7.46-7.39 (5 H, m), 6.21 (1H, br s), 6.11 (1H, dd, *J* = 2.0, 1.6 Hz), 6.04 (1H, dd, *J* = 5.6, 2.0 Hz), 5.84 (1H, d, *J* = 8.8 Hz), 3.98 (3H, s), 3.80 (3H, s). <sup>13</sup>C NMR (100 MHz, CDCl<sub>3</sub>):  $\delta$  171.6, 170.6, 152.4, 146.4, 140.6, 138.7, 133.5, 129.7, 129.6, 127.0, 124.0, 118.1, 111.4, 105.1, 84.7, 68.6, 56.4, 54.1. HRMS Calcd for C<sub>20</sub>H<sub>18</sub>N<sub>2</sub>O<sub>7</sub> [M + H]: 399.11923; Found: 399.11946.  $[\alpha]_D^{26} = +165.45$  (*c* = 1.00, CHCl<sub>3</sub>) for a 92% ee sample. The enantiomeric purity of this compound was determined by chiral HPLC analysis (OD, 80:20 hexanes:*i*-PrOH, 1 mL/min, 254 nm): *t*<sub>R</sub> of **7a**: 16 min (major) and 24 min (minor); *t*<sub>R</sub> of **8a**: 19 min and 21 min.

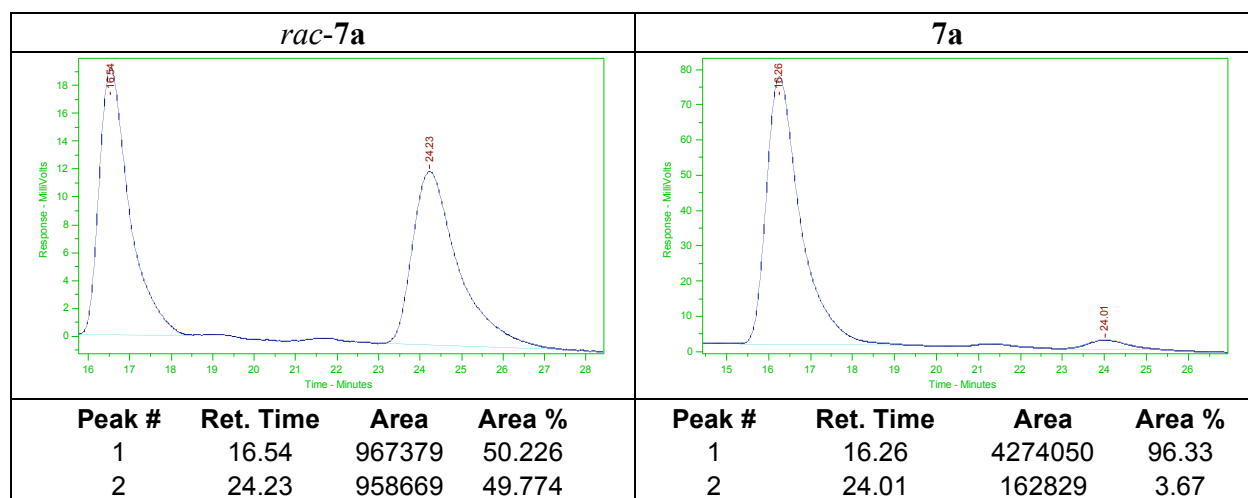

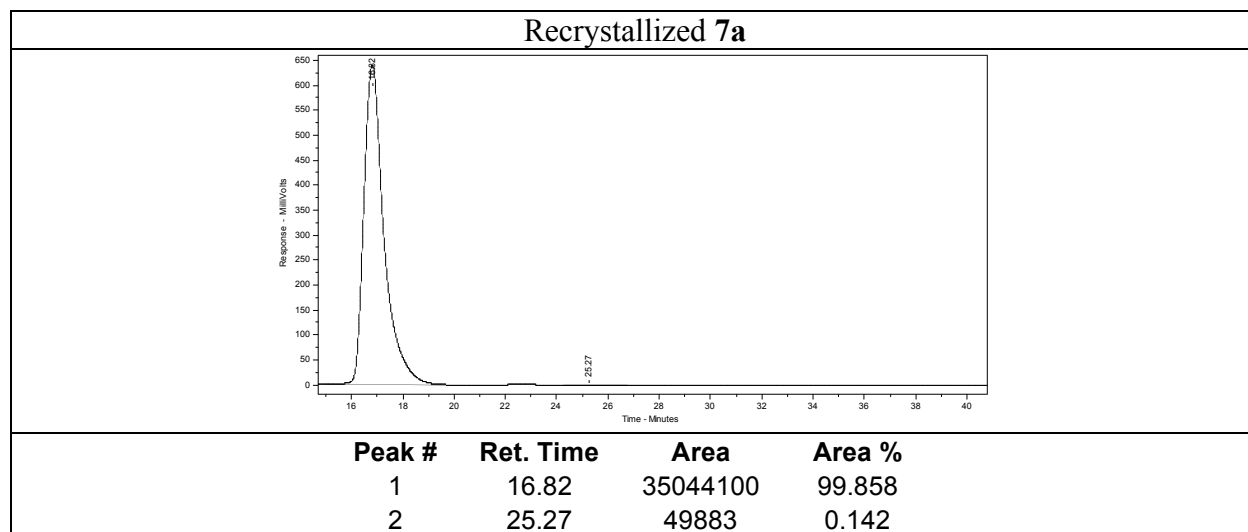

**8a:** IR (neat): 3390 (w, br), 3100 (w, br), 2961 (w, br), 1791 (m), 1766 (s), 1596 (m), 1527 (m), 1501 (m), 1338 (m), 1294 (s), 1262 (m), 1161 (m), 1098 (m), 733 (m)  $\text{cm}^{-1}$ .  $^1\text{H}$  NMR (400 MHz,  $\text{CDCl}_3$ ):  $\delta$  7.61 (1H, d,  $J = 2.4$  Hz), 7.53-7.50 (2H, m), 7.49 (1H, dd,  $J = 9.2, 2.4$  Hz), 7.41-7.39 (3H, m), 7.30 (1H, dd,  $J = 6.0, 1.6$  Hz), 6.26 (1H, br s), 6.17 (1H, dd,  $J = 6.0, 2.0$  Hz), 6.05 (1H, d,  $J = 9.2$  Hz), 5.93 (1H, dd,  $J = 1.8, 1.8$  Hz), 3.89 (3H, s), 3.77 (3H, s).  $^{13}\text{C}$  NMR (100 MHz,  $\text{CDCl}_3$ ):  $\delta$  171.5, 170.2, 152.4, 146.4, 140.5, 138.8, 134.0, 129.54, 129.49, 127.6, 123.9, 118.3, 112.6, 104.9, 85.9, 69.2, 56.4, 54.0. HRMS Calcd for  $\text{C}_{20}\text{H}_{18}\text{N}_2\text{O}_7\text{Na}$ :  $[\text{M} + \text{Na}]$  421.1012; Found: 421.1009.  $[\alpha]_D^{26} = +34.99$  ( $c = 1.00, \text{CHCl}_3$ ) for a 75% ee sample. The enantiomeric purity of the compound is determined by chiral HPLC analysis (OD, 80:20 hexanes:*i*-PrOH, 1 mL/min, 254 nm):  $t_R$  of **8a**: 19 min and 21 min;  $t_R$  of **7a**: 16 min (major) and 24 min (minor).

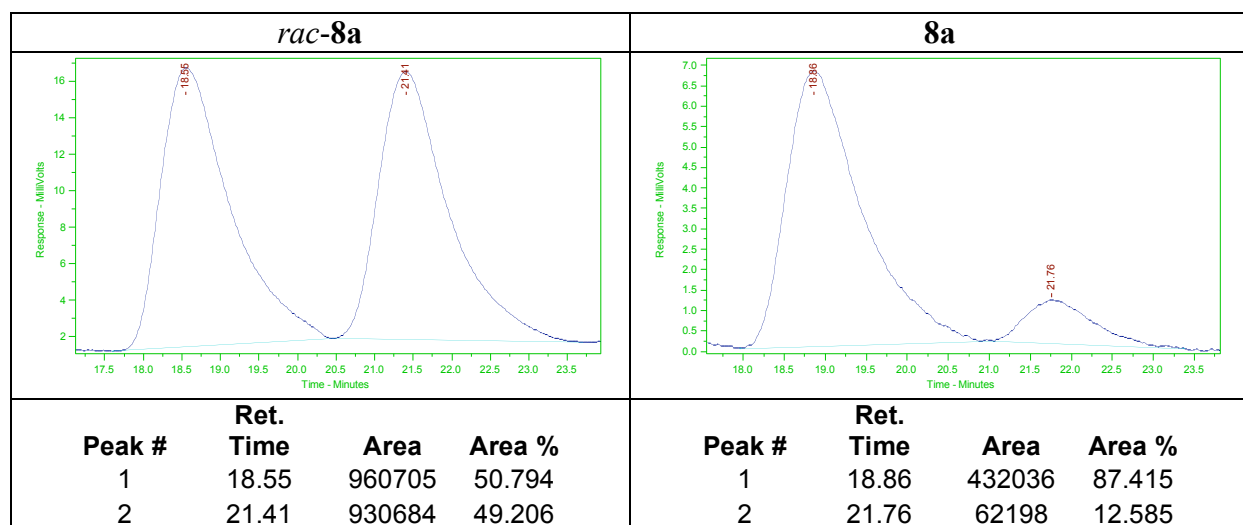

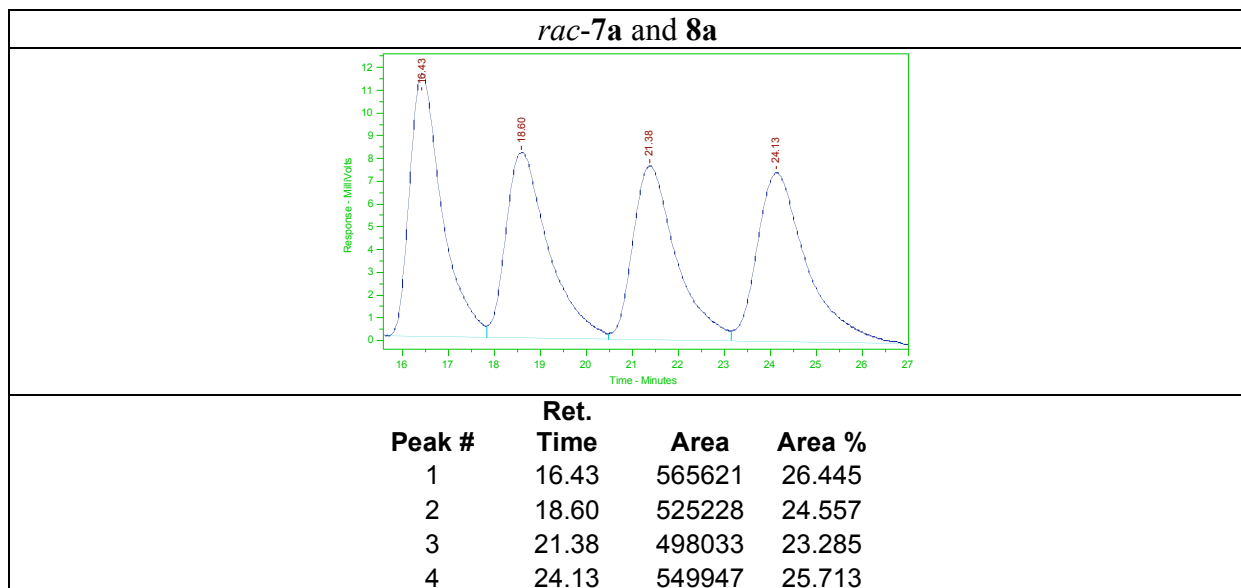

**7b:** IR (neat): 3389 (w, br), 3096 (w, br), 2954 (w, br), 2835 (w, br), 1795 (m), 1758 (s), 1596 (s), 1521 (s), 1503 (m), 1334 (m), 1303 (s), 1260 (m), 1228 (m), 1153 (w), 1098 (m), 1029 (w), 736 (w), 662 (w)  $\text{cm}^{-1}$ .  $^1\text{H}$  NMR (400 MHz,  $\text{CDCl}_3$ ):  $\delta$  7.61 (1H, d,  $J = 2.2$  Hz), 7.53 (1H, dd,  $J = 8.8, 2.4$  Hz), 7.50 (1H, dd,  $J = 5.7, 1.7$  Hz), 7.34 (1H, t,  $J = 7.9$  Hz), 7.02 (1H, ddd,  $J = 7.7, 1.1, 0.7$  Hz), 6.98 (1H, t,  $J = 2.2$  Hz), 6.93 (1H, ddd,  $J = 8.3, 2.5, 0.7$  Hz), 6.19 (1H, br s), 6.10 (1H, t,  $J = 1.8$  Hz), 6.03 (1H, dd,  $J = 5.9, 2.2$  Hz), 5.86 (1H, d,  $J = 8.8$  Hz), 3.98 (3H, s), 3.80 (3H, s), 3.77 (3H, s).  $^{13}\text{C}$  NMR (100 MHz,  $\text{CDCl}_3$ ):  $\delta$  171.6, 170.5, 160.5, 152.4, 146.4, 140.7, 138.7, 135.2, 130.8, 123.9, 119.0, 118.1, 114.3, 113.5, 111.4, 105.1, 84.7, 68.5, 56.5, 55.6, 54.1. HRMS Calcd for  $\text{C}_{21}\text{H}_{21}\text{N}_2\text{O}_8$  [M + H]: 429.1297; Found: 429.1302.  $[\alpha]_D^{23} = +75.26$  ( $c = 1.00$ ,  $\text{CHCl}_3$ ) for a 93% ee sample. The enantiomeric purity of the compound was determined by chiral HPLC analysis (OD, 80:20 hexanes:*i*-PrOH, 1 mL/min, 254 nm):  $t_R$  of **7b**: 19 min (major) and 30 min (minor);  $t_R$  of **8b**: 22 min (major) and 28 min (minor).

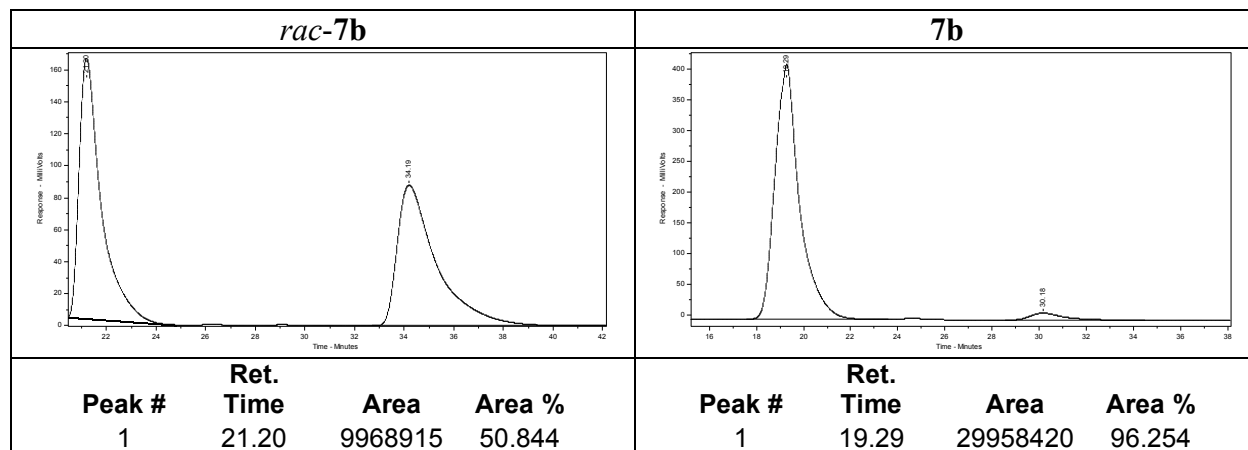



|   |       |         |        |   |       |         |       |
|---|-------|---------|--------|---|-------|---------|-------|
| 2 | 34.19 | 9638127 | 49.156 | 2 | 30.18 | 1165924 | 3.746 |
|---|-------|---------|--------|---|-------|---------|-------|

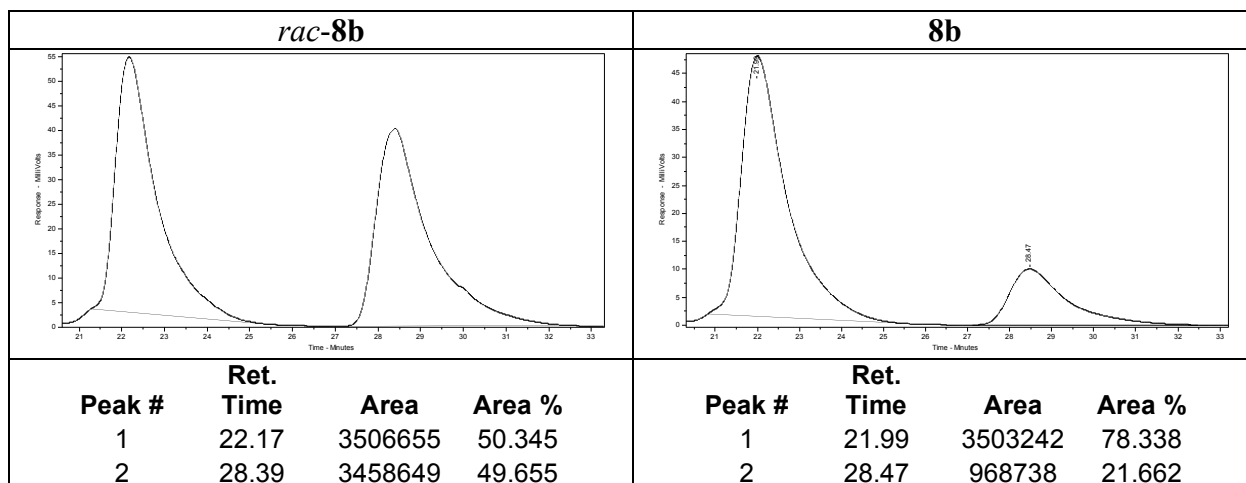

**7c**: IR (neat): 3383 (w, br), 3100 (w, br), 3018 (w, br), 2955 (w, br), 2943 (w, br), 2848 (w, br), 1784 (s), 1759 (s), 1590 (s), 1527 (s), 1507 (m), 1338 (m), 1239 (s), 1256 (m), 1231 (m), 1092 (m), 1029 (w)  $\text{cm}^{-1}$ .  $^1\text{H}$  NMR (400 MHz,  $\text{CDCl}_3$ ):  $\delta$  7.65 (1H, d,  $J = 2.6$  Hz), 7.56 (1H, dd,  $J = 9.2, 2.6$  Hz), 7.52-7.50 (1H, m), 7.46 (1H, dd,  $J = 5.9, 1.5$  Hz), 7.41-7.33 (3H, m), 6.18 (1H, br s), 6.10 (1H, dd,  $J = 5.7, 1.8$  Hz), 6.01 (1H, t,  $J = 1.8$  Hz), 5.85 (1H, d,  $J = 9.2$  Hz), 4.00 (3H, s), 3.80 (3H, s).  $^{13}\text{C}$  NMR (100 MHz,  $\text{CDCl}_3$ ):  $\delta$  171.3, 170.0, 152.0, 146.5, 140.1, 139.0, 135.70, 135.67, 130.8, 129.9, 127.5, 125.5, 124.3, 118.0, 111.4, 105.2, 84.4, 68.3, 56.5, 54.3. HRMS Calcd for  $\text{C}_{20}\text{H}_{17}\text{N}_2\text{O}_7\text{ClNa}$  [ $\text{M} + \text{Na}$ ]: 455.0609; Found: 455.0622.  $[\alpha]_{\text{D}}^{25} = +106.65$  ( $c = 1.00$ ,  $\text{CHCl}_3$ ) for an 88% ee sample. The enantiomeric purity of the compound was determined by chiral HPLC analysis (OD, 90:10 hexanes:*i*-PrOH, 1 mL/min, 254 nm):  $t_{\text{R}}$  of **7c**: 42 min (major) and 80 min (minor);  $t_{\text{R}}$  of **8c**: 46 min (major) and 66 min (minor).

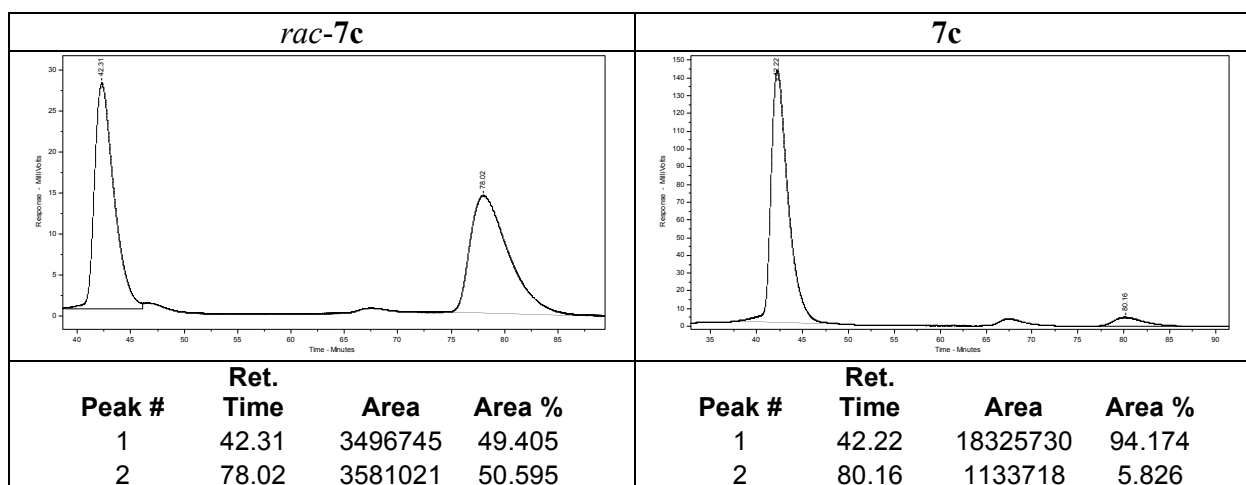

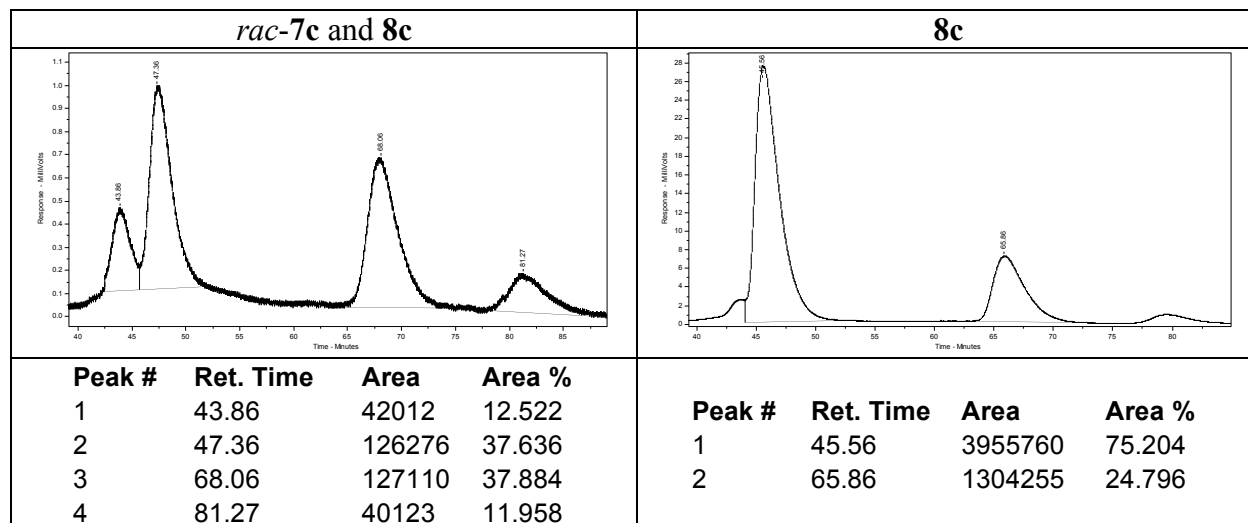

**7d**: IR (neat): 3386 (w, br), 3094 (w, br), 3019 (w, br), 2926 (w, br), 2846 (w, br), 1791 (m), 1753 (m), 1591 (m), 1523 (m), 1505 (m), 1338 (m), 1288 (s), 1232 (m), 1095 (m), 741 (m)  $\text{cm}^{-1}$ .  $^1\text{H}$  NMR (400 MHz,  $\text{CDCl}_3$ ):  $\delta$  7.63 (1H, d,  $J = 2.6$  Hz), 7.56-7.52 (3H, m), 7.46 (1H, dd,  $J = 5.9, 1.5$  Hz), 7.35 (2 H, ddd,  $J = 9.2, 2.3, 2.3$  Hz), 6.17 (1H, br s), 6.08 (1H, dd,  $J = 5.8, 1.8$  Hz), 6.00 (1H, t,  $J = 1.8$  Hz), 5.86 (1H, d,  $J = 9.2$  Hz), 3.99 (3H, s), 3.79 (3H, s).  $^{13}\text{C}$  NMR (100 MHz,  $\text{CDCl}_3$ ):  $\delta$  171.3, 170.1, 152.1, 146.5, 140.1, 139.0, 132.8, 132.5, 129.0, 124.3, 124.0, 118.1, 111.5, 105.2, 84.3, 68.3, 56.5, 54.2. HRMS Calcd for  $\text{C}_{20}\text{H}_{17}\text{N}_2\text{O}_7\text{BrNa}$  [ $\text{M} + \text{Na}$ ]: 499.0117; Found: 499.0121.  $[\alpha]_D^{26} = +67.8$  ( $c = 1.00, \text{CHCl}_3$ ) for a 94% ee sample. The enantiomeric purity of the compound was determined by chiral HPLC analysis (OD, 80:20 hexanes:*i*-PrOH, 1 mL/min, 254 nm):  $t_R$  of **7d**: 21 min (major) and 57 min (minor).

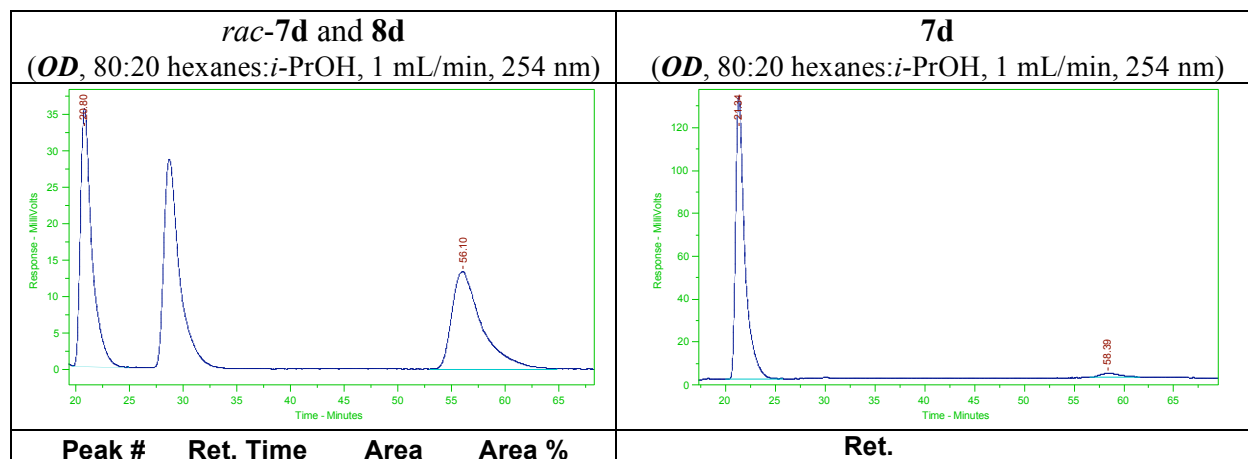

|                                     |      |         |        |             |       |         |        |
|-------------------------------------|------|---------|--------|-------------|-------|---------|--------|
| 1                                   | 20.8 | 2641062 | 50.596 | <b>Time</b> |       |         |        |
| 2                                   | 56.1 | 2578827 | 49.404 | 1           | 21.34 | 8461288 | 96.822 |
| <i>peak at 28 min is rac-syn-8d</i> |      |         |        | 2           | 58.39 | 277741  | 3.178  |

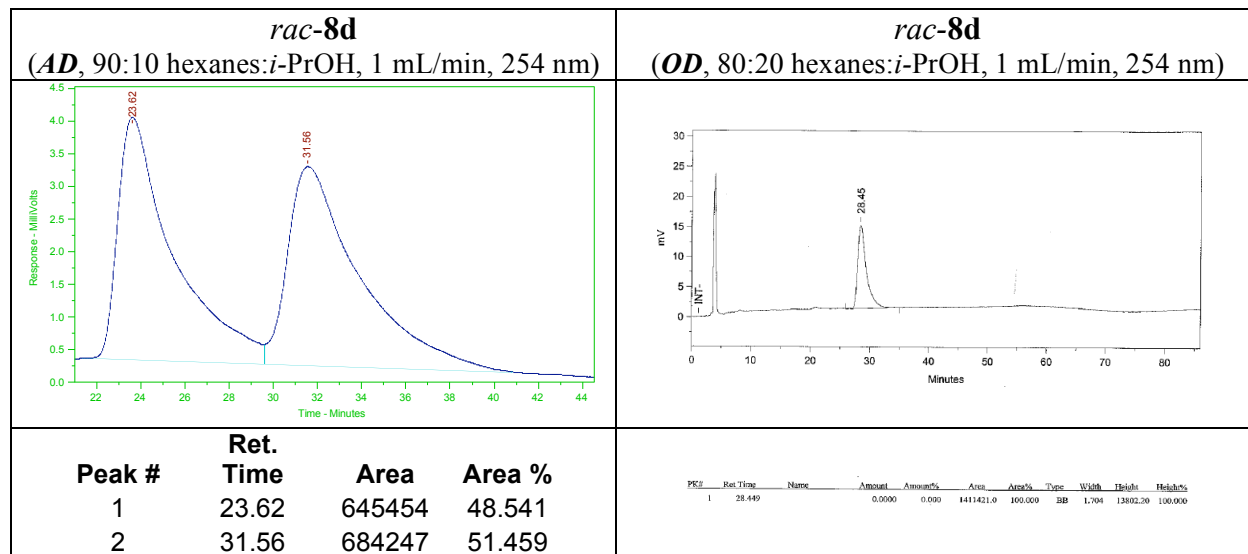

**7e:** IR (neat): 3387 (w, br), 1789 (m), 1758 (s), 1593 (m), 1526 (m), 1295 (s), 1231 (m), 1096 (m), 1028 (m), 746 (m)  $\text{cm}^{-1}$ .  $^1\text{H}$  NMR (400 MHz,  $\text{CDCl}_3$ ):  $\delta$  7.73 (2H, ddd,  $J = 8.8, 2.2, 2.2$  Hz), 7.63 (1H, d,  $J = 2.6$  Hz), 7.55 (1H, dd,  $J = 8.8, 2.6$  Hz), 7.45 (1H, dd,  $J = 5.8, 1.5$  Hz), 7.21 (2H, ddd,  $J = 8.4, 2.2, 2.2$  Hz), 6.16 (1H, br s), 6.08 (1H, dd,  $J = 5.9, 2.2$  Hz), 6.00 (1H, dd,  $J = 1.8, 1.8$  Hz), 5.86 (1H, d,  $J = 8.8$  Hz), 3.98 (3H, s), 3.78 (3H, s).  $^{13}\text{C}$  NMR (100 MHz,  $\text{CDCl}_3$ ):  $\delta$  171.3, 170.1, 152.1, 146.5, 140.1, 138.9, 138.7, 133.2, 129.1, 124.3, 118.1, 111.5, 105.2, 95.8, 84.3, 68.4, 56.5, 54.2. HRMS Calcd for  $\text{C}_{20}\text{H}_{18}\text{N}_2\text{O}_7\text{I}$  [M + H]: 525.01587; Found: 525.01710.  $[\alpha]_D^{24} = +69.9$  ( $c = 1.00$ ,  $\text{CHCl}_3$ ) for a 94% ee sample. The enantiomeric purity of the compound was determined by chiral HPLC analysis (OD, 80:20 hexanes:*i*-PrOH, 1 mL/min, 254 nm):  $t_R$  of **7e**: 26 min (major) and 89 min (minor);  $t_R$  of **8e**: 33 min and 39 min.

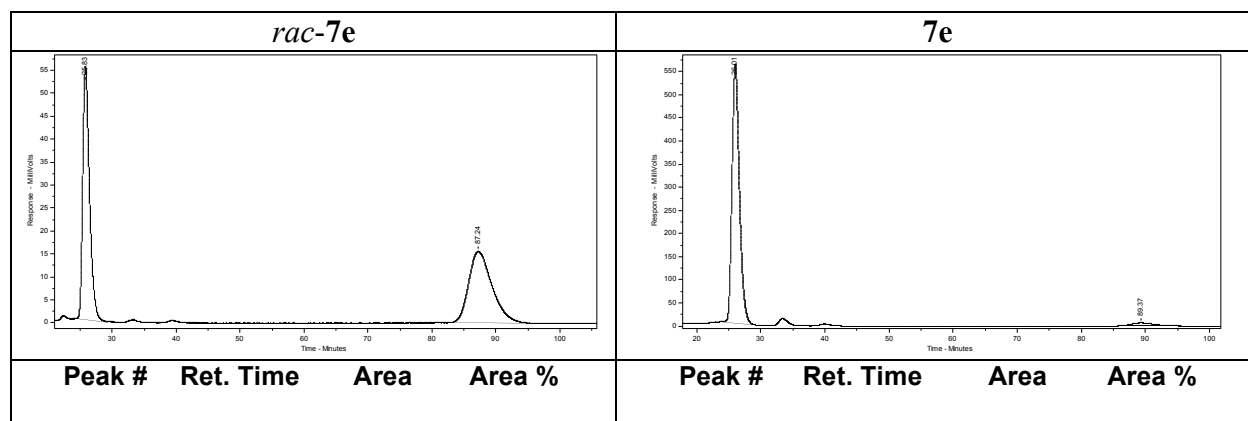

|   |       |         |        |   |       |         |       |
|---|-------|---------|--------|---|-------|---------|-------|
| 2 | 87.24 | 3957386 | 49.287 | 2 | 89.37 | 1409877 | 3.032 |
|---|-------|---------|--------|---|-------|---------|-------|

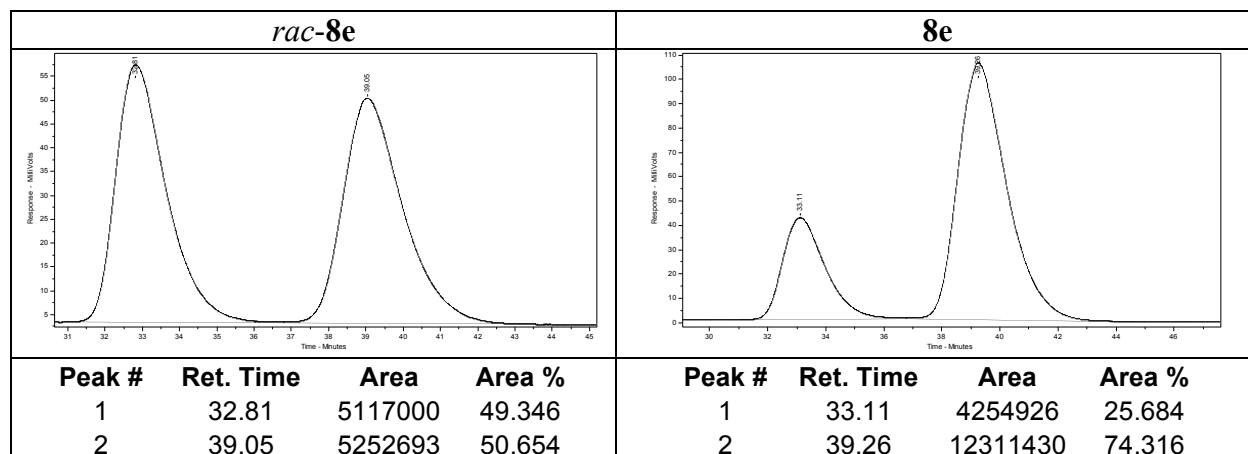

**7f**: IR (neat): 3387 (w, br), 3099 (w, br), 3019 (w, br), 2961 (w, br), 2870 (w, br), 1788 (m), 1755 (m), 1592 (m), 1526 (m), 1504 (m), 1321 (m), 1292 (s), 1229 (m), 1093 (m), 1026 (m), 817 (m), 797 (m), 744 (s)  $\text{cm}^{-1}$ .  $^1\text{H}$  NMR (400 MHz,  $\text{CDCl}_3$ ):  $\delta$  7.61 (1H, d,  $J = 2.2$  Hz), 7.54 (1H, dd,  $J = 8.8, 2.2$  Hz), 7.48 (1H, dd,  $J = 5.9, 1.8$  Hz), 7.43-7.33 (4 H, m), 6.15 (1H, br s), 6.11 (1H, t,  $J = 1.8$  Hz), 6.03 (1H, dd,  $J = 5.9, 2.2$  Hz), 5.86 (1H, d,  $J = 9.2$  Hz), 3.97 (3H, s), 3.79 (3H, s), 1.31 (9H, s).  $^{13}\text{C}$  NMR (100 MHz,  $\text{CDCl}_3$ ):  $\delta$  171.7, 170.8, 152.8, 152.5, 146.4, 140.8, 138.6, 130.4, 126.62, 126.58, 124.0, 118.1, 111.4, 105.1, 84.9, 68.4, 56.5, 54.0, 34.9, 31.4. HRMS Calcd for  $\text{C}_{24}\text{H}_{27}\text{N}_2\text{O}_7$  [ $\text{M} + \text{H}$ ]: 455.18183; Found: 455.18032.  $[\alpha]_D^{23} = +90.6$  ( $c = 0.500$ ,  $\text{CHCl}_3$ ) for a 90% ee sample. The enantiomeric purity of the compound was determined by chiral HPLC analysis (OD, 80:20 hexanes:*i*-PrOH, 1 mL/min, 254 nm):  $t_R$  of **7f**: 12 min (major) and 26 min (minor);  $t_R$  of **8f**: 15 min and 17 min

|                             |           |
|-----------------------------|-----------|
| <i>rac-7f</i> and <b>8f</b> | <b>7f</b> |
|-----------------------------|-----------|

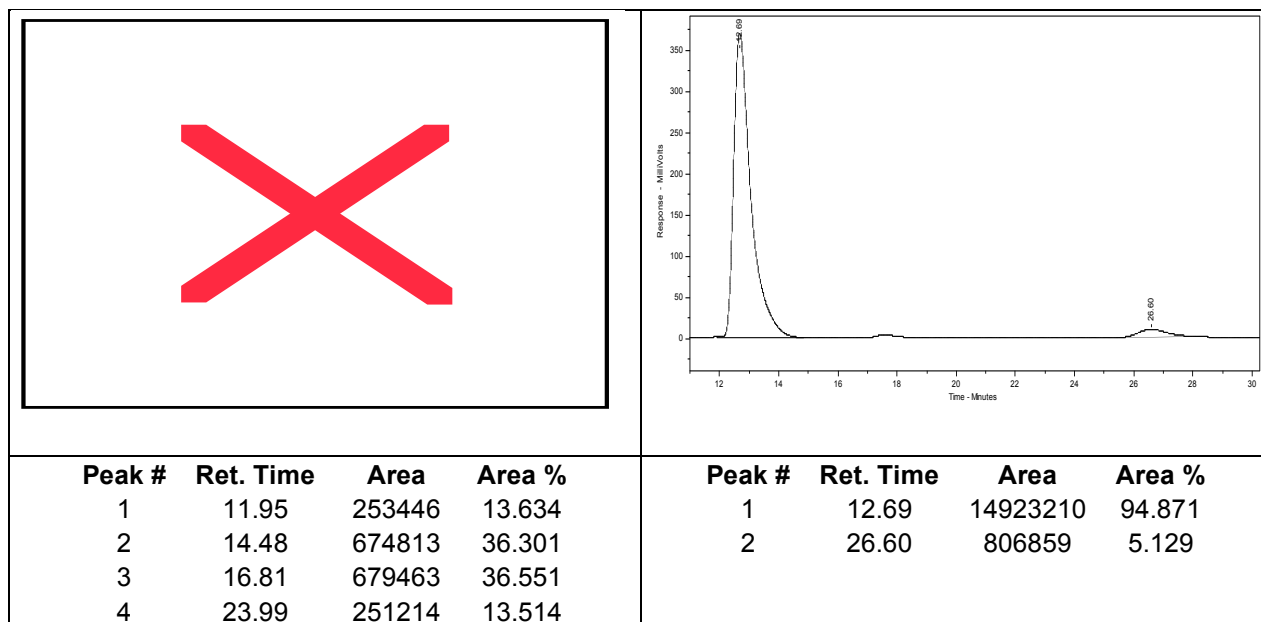

**7g**: IR (neat): 3389 (w, br), 3106 (w, br), 2986 (w, br), 2873 (w, br), 1791 (m), 1759 (m), 1589 (m), 1527 (m), 1508 (m), 1325 (s), 1294 (s), 1256 (m), 1237 (m), 1167 (m), 1130 (m), 1099 (m)  $\text{cm}^{-1}$ .  $^1\text{H}$  NMR (400 MHz,  $\text{CDCl}_3$ ):  $\delta$  7.67-7.63 (5H, m), 7.53 (1H, dd,  $J = 8.8, 2.4$  Hz), 7.46 (1H, dd,  $J = 5.8, 1.8$  Hz), 6.24 (1H, br s), 6.10 (1H, dd,  $J = 6.0, 2.0$  Hz), 6.03 (1H, t,  $J = 1.8$  Hz), 5.82 (1H, d,  $J = 9.2$  Hz), 4.00 (3H, s), 3.80 (3H, s).  $^{13}\text{C}$  NMR (100 MHz,  $\text{CDCl}_3$ ):  $\delta$  171.2, 169.9, 151.9, 146.5, 139.9, 139.1, 137.6, 131.8 (q,  $J = 33.0$  Hz), 128.0, 126.5 (q,  $J = 3.8$  Hz), 125.4 (q,  $J = 202$  Hz), 124.4, 118.1, 111.3, 105.3, 84.2, 68.5, 56.5, 54.3. HRMS Calcd for  $\text{C}_{21}\text{H}_{17}\text{N}_2\text{O}_7\text{F}_3\text{Na}$  [ $\text{M} + \text{Na}$ ]: 489.0886; Found: 489.0882.  $[\alpha]_{\text{D}}^{25} = +43.5$  ( $c = 0.630$ ,  $\text{CHCl}_3$ ) for a 91% ee sample. The enantiomeric purity of the compound was determined by chiral HPLC analysis (OD, 80:20 hexanes:*i*-PrOH, 1 mL/min, 254 nm):  $t_{\text{R}}$  of **7g**: 15 min (major) and 30 min (minor).

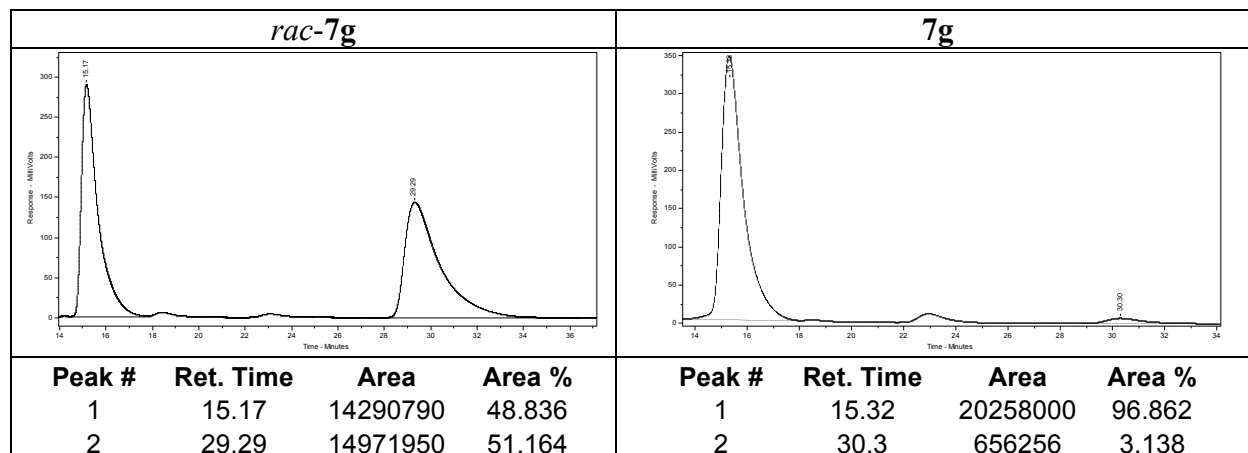

**7h**: IR (neat): 3382 (w, br), 3102 (w, br), 2953 (w, br), 1788 (m), 1759 (s), 1587 (s), 1527 (m), 1331 (m), 1301 (s), 1230 (m), 1093 (m)  $\text{cm}^{-1}$ .  $^1\text{H}$  NMR (400 MHz,  $\text{CDCl}_3$ ):  $\delta$  8.04 (1H, d,  $J = 2.2$  Hz), 7.89-7.85 (2H, m), 7.85 (1H, d,  $J = 8.4$  Hz), 7.62 (1 H, d,  $J = 2.6$  Hz), 7.58-7.54 (3H, m), 7.44 (2H, ddd,  $J = 10.4, 6.0, 2.0$  Hz), 6.33 (1H, br s), 6.24 (1H, dd,  $J = 1.8, 1.8$  Hz), 6.05 (1H, dd,  $J = 5.6, 2.0$  Hz), 5.85 (1H, d,  $J = 8.8$  Hz), 4.01 (3H, s), 3.80 (3H, s).  $^{13}\text{C}$  NMR (100 MHz,  $\text{CDCl}_3$ ):  $\delta$  171.6, 170.6, 152.3, 146.5, 140.7, 138.7, 133.5, 133.4, 131.2, 129.7, 128.7, 128.0, 127.7, 127.3, 126.7, 124.1, 124.0, 118.1, 111.5, 105.1, 84.9, 68.8, 56.5, 54.2. HRMS Calcd for  $\text{C}_{24}\text{H}_{20}\text{N}_2\text{O}_7\text{Na}$  [ $\text{M} + \text{Na}$ ]: 471.1168; Found: 471.1164.  $[\alpha]_{\text{D}}^{26} = +114.7$  ( $c = 1.00$ ,  $\text{CHCl}_3$ ) for a 90% ee sample. The optical purity of the compound is determined by chiral HPLC analysis (OD, 80:20 hexanes:*i*-PrOH, 1 mL/min, 254 nm):  $t_{\text{R}}$  of **7h**: 39 min (major) and 183 min (minor);  $t_{\text{R}}$  of **8h**: 52 min and 64 min.

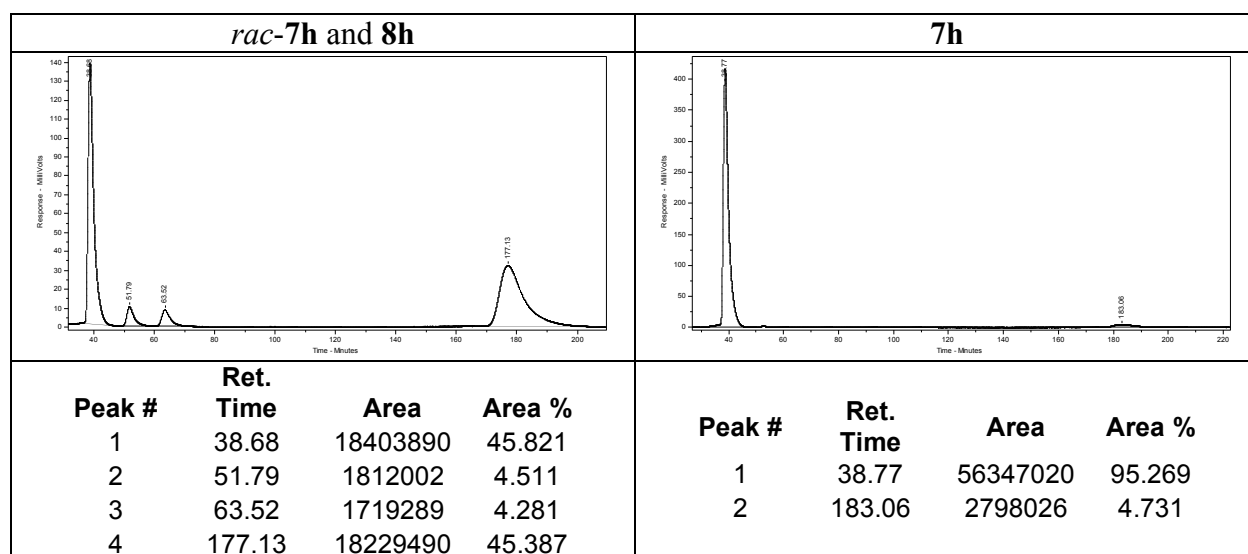

**8i**: IR (neat): 3365 (w, br), 3083 (w), 2953 (w), 2833 (w), 1787 (m), 1760 (m), 1744 (m), 1592 (m), 1526 (m), 1503 (m), 1476 (m), 1439 (m), 1333 (m), 1292 (s), 1257 (m), 1228 (m), 1197 (m), 1159 (m), 1100 (m), 1029 (m), 889 (m), 823 (m), 800 (m), 746 (m)  $\text{cm}^{-1}$ .  $^1\text{H}$  NMR (400 MHz,  $\text{CDCl}_3$ ):  $\delta$  8.03 (1H, dd,  $J = 8.4, 1.6$  Hz), 7.56 (1H, d,  $J = 2.8$  Hz), 7.52-7.41 (3H, m), 7.34 (1H, dd,  $J = 6.0, 1.6$  Hz), 7.25 (1H, dt,  $J = 7.6, 1.6$  Hz), 6.44 (1H, br s), 6.29 (1H, dd,  $J = 4.0, 1.6$  Hz), 6.18 (1H, d,  $J = 9.2$  Hz), 6.11 (1H, t,  $J = 1.6$  Hz), 3.94 (3H, s), 3.86 (3H, s).  $^{13}\text{C}$  NMR (100 MHz,  $\text{CDCl}_3$ ):  $\delta$  171.0, 170.5, 151.9, 146.6, 140.2, 138.7, 135.2, 134.4, 131.7, 130.7, 128.0, 124.7, 123.0, 118.2, 111.5, 104.9, 84.4, 70.3, 56.4, 54.6. HRMS Calcd for  $\text{C}_{20}\text{H}_{18}\text{N}_2\text{O}_7$  [ $\text{M} + \text{H}$ ]: 477.02974; Found: 477.02861  $[\alpha]_{\text{D}}^{24} = -25.11$  ( $c = 1.00$ ,  $\text{CHCl}_3$ ) for a 24% ee sample. The

enantiomeric purity of the compound is determined by chiral HPLC analysis (OD, 90:10 hexanes:*i*-PrOH, 0.7 mL/min, 254 nm):  $t_R$  of **8i**: 69 min and 78 min.

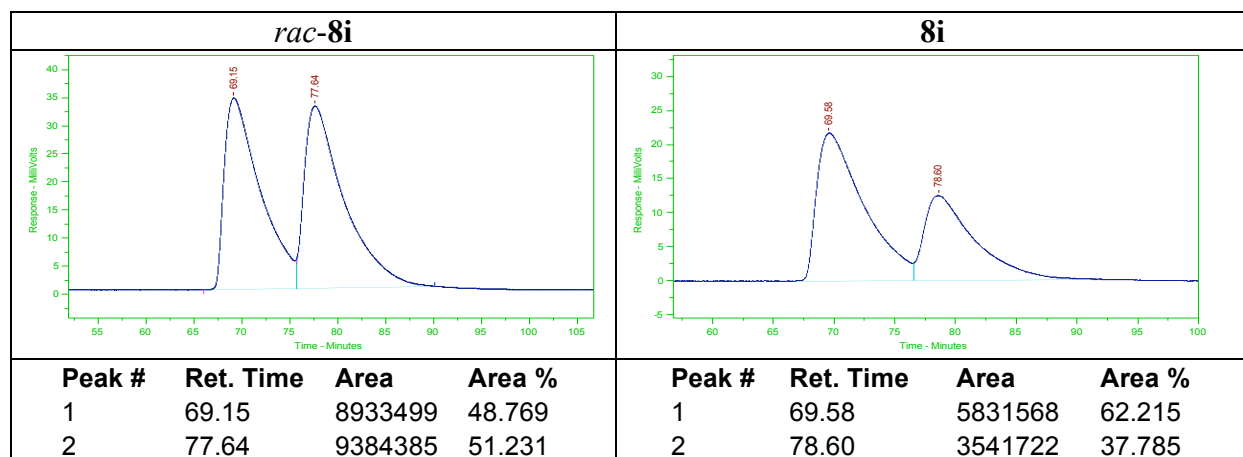

**7j**: IR (neat): 3375 (w, br), 3105 (w), 2957 (w), 2919 (w), 2847 (w), 1792 (m), 1755 (m), 1595 (m), 1531 (m), 1509 (m), 1337 (m), 1299 (s), 1265 (m), 1236 (m), 1159 (m), 1101 (m), 1025 (m), 906 (m), 797 (m), 733 (m)  $\text{cm}^{-1}$ .  $^1\text{H}$  NMR (400 MHz,  $\text{CDCl}_3$ ):  $\delta$  7.63-7.61 (2H, m), 7.45 (1H, dd,  $J = 6.0, 1.4$  Hz), 7.42 (1H, dd,  $J = 2.0, 0.80$  Hz), 6.70 (1H, dd,  $J = 3.6, 0.80$  Hz), 6.45 (1H, dd,  $J = 3.4, 1.6$  Hz), 6.27 (1H, br s), 6.24 (1H, d,  $J = 9.2$  Hz), 6.19 (1H, dd,  $J = 5.8, 2.2$  Hz), 5.87 (1H, dd,  $J = 1.4, 1.4$  Hz), 3.98 (3H, s), 3.78 (3H, s).  $^{13}\text{C}$  NMR (100 MHz,  $\text{CDCl}_3$ ):  $\delta$  171.3, 168.4, 152.2, 147.1, 146.6, 143.8, 140.7, 139.3, 123.8, 118.6, 112.0, 111.4, 110.7, 105.1, 84.1, 65.9, 56.4, 54.2. HRMS Calcd for  $\text{C}_{18}\text{H}_{16}\text{N}_2\text{O}_8\text{Na}$  [ $\text{M} + \text{Na}$ ]: 411.0804; Found: 411.0793.  $[\alpha]_D^{24} = +3.49$  ( $c = 0.230$ ,  $\text{CHCl}_3$ ) for a 58% ee sample. The enantiomeric purity of the compound is determined by chiral HPLC analysis (OD, 80:20 hexanes:*i*-PrOH, 1 mL/min, 254 nm):  $t_R$  of **7j**: 20 min and 25 min.

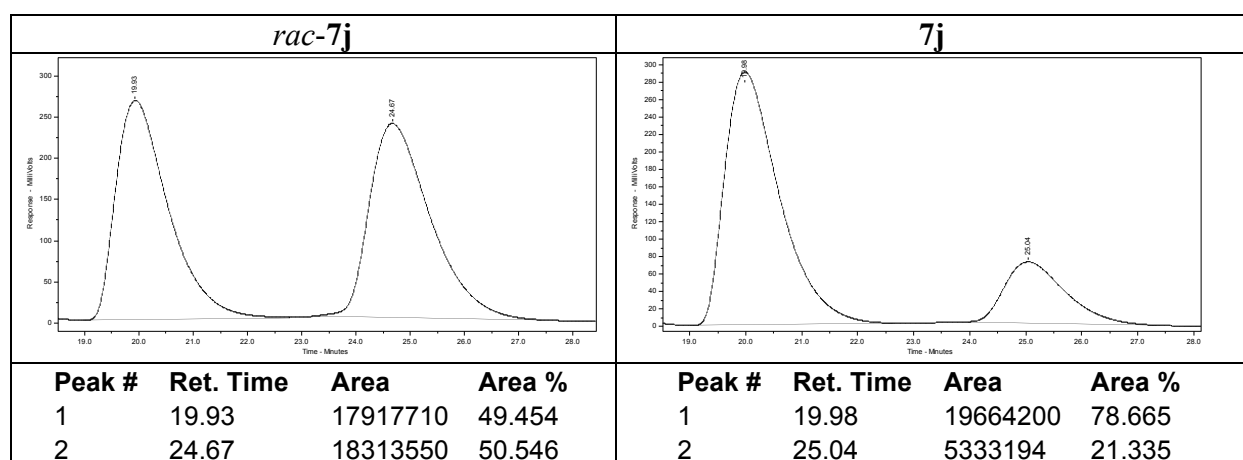

**7k**: IR (neat): 3384(w, br), 3104 (w, br), 2926 (w), 2852 (w), 1789 (m), 1732 (s), 1592 (s), 1525 (m), 1505 (m), 1323 (m), 1292 (s), 1229 (s), 1155 (m), 1095 (m), 1043 (m), 1026 (m), 890 (m), 798 (m), 745 (m)  $\text{cm}^{-1}$ .  $^1\text{H}$  NMR (400 MHz,  $\text{CDCl}_3$ , major isomer):  $\delta$  7.63 (1H, d,  $J = 2.2$  Hz), 7.58 (1H, m), 7.54 (1H, dd,  $J = 2.9, 1.5$  Hz), 7.44 (1H, dd,  $J = 5.9, 1.5$  Hz), 7.35 (1H, dd,  $J = 5.1, 2.9$  Hz), 7.04 (1H, dd,  $J = 5.1, 1.5$  Hz), 6.13 (1H, dd,  $J = 5.8, 2.2$  Hz), 6.03 (1H, s), 5.95 (1H, d,  $J = 8.8$  Hz), 5.88 (1H, t,  $J = 2.2$  Hz), 3.97 (3H, s), 3.80 (3H, s).  $^{13}\text{C}$  NMR (100 MHz,  $\text{CDCl}_3$ ):  $\delta$  171.4, 170.2, 152.2, 146.3, 140.6, 138.9, 134.6, 127.4, 126.8, 124.8, 124.0, 118.1, 111.0, 105.1, 85.0, 66.4, 56.4, 54.0. HRMS Calcd for  $\text{C}_{18}\text{H}_{17}\text{N}_2\text{O}_7\text{S}$  [M + H]: 405.07565; Found: 405.07530.  $[\alpha]_D^{23} = +107.9$  ( $c = 1.00$ ,  $\text{CHCl}_3$ ) for a 92% ee sample. The enantiomeric purity of the compound is determined by chiral HPLC analysis (OD, 80:20 hexanes:*i*-PrOH, 1 mL/min, 254 nm):  $t_R$  of **7k**: 18 min (major) and 29 min (minor).

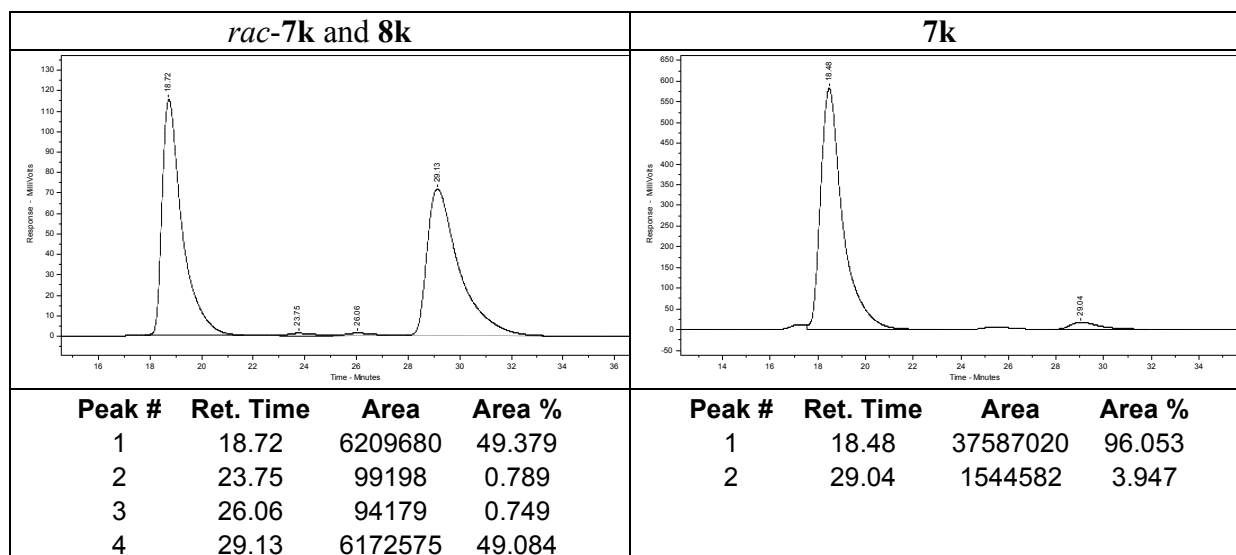

**7m**: IR (neat): 3381(w, br), 3094 (w, br), 2953 (w, br), 2846 (w, br), 1787 (m), 1754 (m), 1592 (m), 1523 (m), 1493 (m), 1324 (m), 1292 (s), 1228 (m), 1093 (m), 1026 (m), 816 (m), 796 (m), 744 (m)  $\text{cm}^{-1}$ .  $^1\text{H}$  NMR (400 MHz,  $\text{CDCl}_3$ ):  $\delta$  7.63 (1H, d,  $J = 2.6$  Hz), 7.56-7.53 (1H, dd,  $J = 8.8, 2.6$  Hz), 7.47-7.45 (1H, dd,  $J = 5.9, 1.5$  Hz), 7.43-7.36 (4H, m), 6.18 (1H, br s), 6.09-6.07 (1H, dd,  $J = 5.9, 1.8$  Hz), 6.01 (1H, t,  $J = 1.8$  Hz), 5.86 (1H, d,  $J = 8.8$  Hz), 3.99 (3H, s), 3.79 (3H, s).  $^{13}\text{C}$  NMR (100 MHz,  $\text{CDCl}_3$ ):  $\delta$  171.6, 170.4, 152.3, 146.7, 140.3, 139.2, 136.0, 132.2, 130.0, 129.0, 124.5, 118.3, 111.7, 105.4, 84.6, 68.5, 56.7, 54.4. HRMS Calcd for  $\text{C}_{20}\text{H}_{18}\text{N}_2\text{O}_7\text{Cl}$  (M + H): 433.08025; Found: 433.07983.  $[\alpha]_D^{25} = 67.6$  ( $c = 1.0$ ,  $\text{CHCl}_3$ ) for a 96% ee sample. The enantiomeric purity of the compound is determined by chiral HPLC analysis (OD, 80:20 hexanes:*i*-PrOH, 1 mL/min, 254 nm):  $t_R$  of **7m**: 18 min and 41 min.



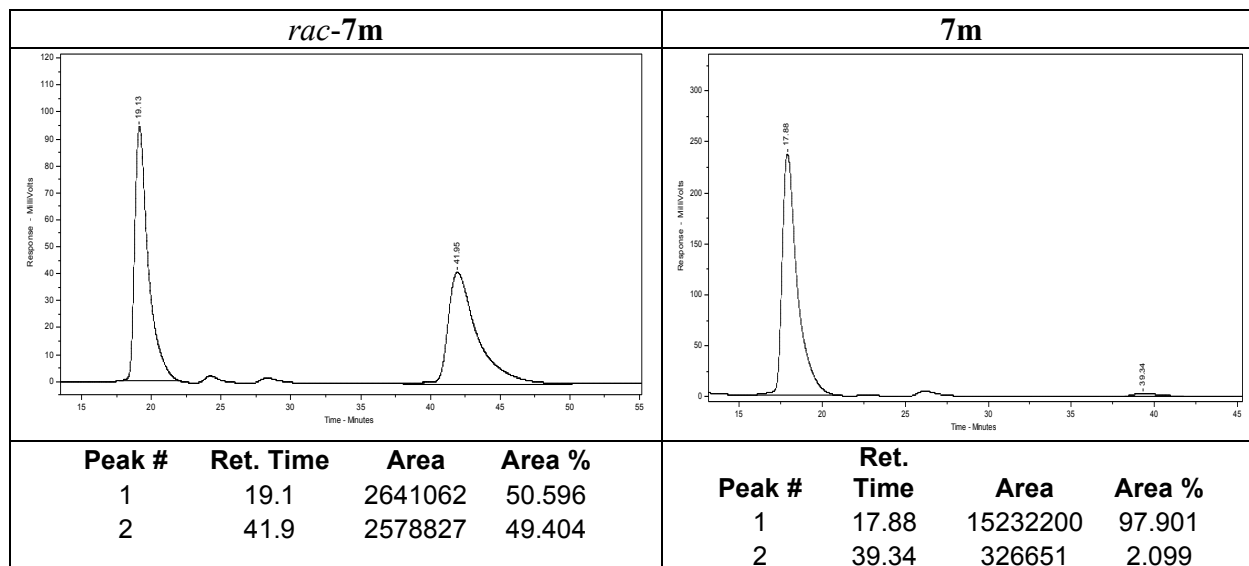

**17**: IR (neat): 3396 (w, br), 3006 (w), 2949 (w), 2829 (w), 1761 (m), 1759 (s), 1757 (m), 1595 (m), 1520 (m), 1464 (m), 1250 (m), 1224 (m), 1162 (m), 1092 (m), 1048 (m), 1029 (m), 746 (m)  $\text{cm}^{-1}$ .  $^1\text{H}$  NMR (400 MHz,  $\text{CDCl}_3$ ):  $\delta$  7.50 (1H, dd,  $J = 5.6, 1.6$  Hz), 6.76-7.72 (3H, m), 6.52-6.48 (1H, m), 6.03 (1H, dd,  $J = 6.0, 2.0$  Hz), 5.56 (1H, dd,  $J = 1.8, 1.8$  Hz), 4.66 (1H, br s), 3.81 (3H, s), 3.76 (3H, s), 1.59 (3H, s).  $^{13}\text{C}$  NMR (100 MHz,  $\text{CDCl}_3$ ):  $\delta$  173.2, 172.7, 153.7, 148.4, 134.5, 122.8, 120.9, 119.8, 114.3, 110.3, 85.5, 62.9, 55.8, 53.1, 21.4. HRMS Calcd for  $\text{C}_{15}\text{H}_{17}\text{NO}_5$  [ $\text{M} + \text{H}$ ]: 291.11067; Found: 291.11070.  $[\alpha]_D^{26} = 135.73$  ( $c = 1.00$ ,  $\text{CHCl}_3$ ) for an 87% ee sample. The optical purity of the compound is determined by chiral HPLC analysis (OD, 80:20 hexanes:*i*-PrOH, 1 ml/min, 254 nm):  $t_R$  of **17**: 17 min (minor) and 18 min (major).

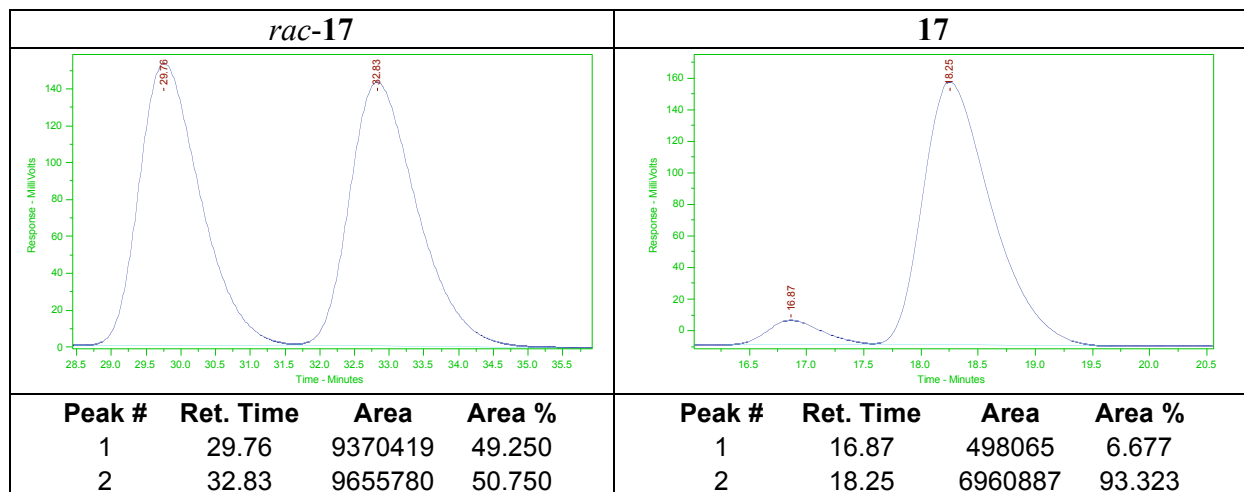

**17** (recrystallized to optical purity)

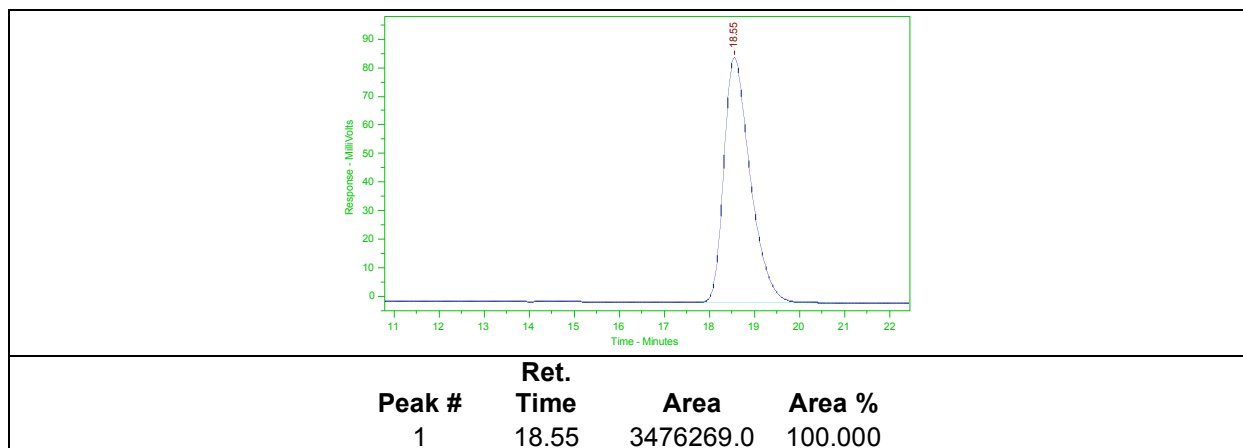

**18:** IR (neat): 3367 (w, br), 3105 (w), 2952 (w), 2839 (w), 2141 (w), 1761 (m), 1756 (s), 1738 (s), 1721 (s), 1641 (m), 1600 (m), 1516 (m), 1488 (m), 1459 (m), 1263 (s), 1223 (s), 1181 (m), 1162 (m), 1153 (m), 1108 (m), 1047 (m), 1025 (m), 905 (m), 745 (m)  $\text{cm}^{-1}$ .  $^1\text{H}$  NMR (400 MHz,  $\text{CDCl}_3$ ):  $\delta$  6.78 (3H, t,  $J = 4.5$  Hz), 5.88-5.87 (1H, m), 5.45 (1H, s), 4.72 (1H, br s), 3.81 (3H, s), 3.74 (3H, s), 2.11 (3H, s), 1.48 (3H, s).  $^{13}\text{C}$  NMR (100 MHz,  $\text{CDCl}_3$ ):  $\delta$  173.0, 167.0, 153.7, 149.0, 134.1, 121.1, 120.0, 119.8, 115.8, 110.3, 86.2, 63.0, 55.9, 53.1, 18.7, 16.0. HRMS Calcd for  $\text{C}_{16}\text{H}_{20}\text{NO}_5$  [M + H]: 306.13415; Found: 306.13391.  $[\alpha]_D^{24} = +16.464$  ( $c = 1.00$ ,  $\text{CHCl}_3$ ) for a 72% ee sample. The optical purity of the compound is determined by chiral HPLC analysis (OD, 95:5 hexanes:*i*-PrOH, 1 ml/min, 254 nm):  $t_R$  of **18**: 28 min (major) and 40 min (minor).

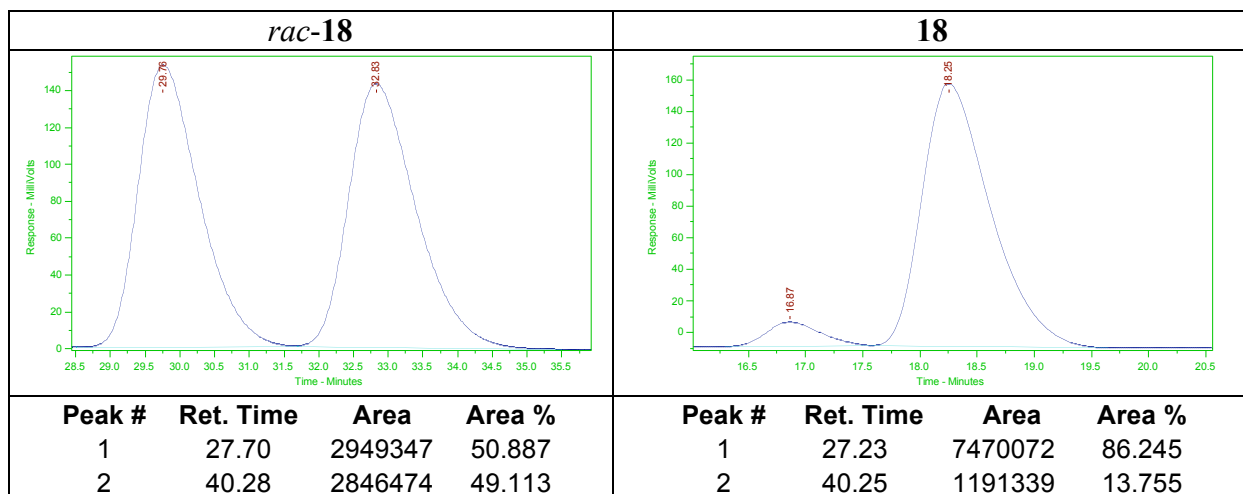

**16:** IR (neat): 3262 (w, br), 3052 (w), 2952 (w, br), 2838 (w, br), 1736 (m), 1675 (s), 1592 (m), 1557 (s), 1510 (m), 1462 (m), 1435 (m), 1338 (m), 1264 (s), 1242 (s), 1169 (m), 1058 (m), 828 (m), 784 (m), 745 (m), 697 (m)  $\text{cm}^{-1}$ .  $^1\text{H}$  NMR (400 MHz,  $\text{CDCl}_3$ ):  $\delta$  9.25 (1H, s br), 8.39 (1H, d,  $J = 2.8$  Hz), 7.62-7.58 (2H, m), 7.38-7.18 (11H, m), 6.87-6.83 (2H, m), 6.36 (1H, d,  $J = 4.4$  Hz), 3.98 (3H, s), 3.78 (3H, s), 3.52 (1H, d,  $J = 1.6$  Hz), 3.47 (3H, s).  $^{13}\text{C}$  NMR (100 MHz,  $\text{CDCl}_3$ ):

$\delta$  169.5, 161.22, 161.17, 156.2, 150.5, 149.3, 140.1, 138.5, 138.4, 137.1, 137.0, 134.6, 134.4, 133.1, 133.0, 132.2, 132.1, 131.2, 129.2, 129.1, 128.83, 128.76, 128.65, 128.61, 128.5, 121.6, 117.4, 114.3, 114.2, 114.1, 85.5, 56.2, 55.6, 55.5, 35.5, 27.1. HRMS Calcd for  $C_{34}H_{38}N_2O_4P$  [M + H]: 569.25692; Found: 569.25454.  $[\alpha]_D^{23} = +70.1$  ( $c = 1.00$ ,  $CHCl_3$ ) for a >98% ee sample.

**Experimental procedure for  $SnCl_2$ -mediated reduction of **7a** followed by  $PhI(OAc)_2$ -mediated deprotection:** A 50 mL round bottom flask was charged with catalytic AVM product **7a** (200 mg, 0.502 mmol),  $SnCl_2$  (476 mg, 2.51 mmol), and ethanol (10.0 mL). The round bottom flask was fitted with a reflux condenser, and the mixture was allowed to warm to 65 °C with stirring. The resulting homogeneous solution was kept at 65 °C for 15 h before careful addition of a saturated solution of  $NaHCO_3$ . The aqueous layer was washed with EtOAc (3 x 50 mL). The organic layers were combined, dried over  $MgSO_4$ , and the volatiles were removed *in vacuo*. The residue was redissolved in EtOAc and the solution was passed through a plug of  $SiO_2$  (EtOAc). The volatiles were again removed *in vacuo*, and the resulting brown oil residue was analyzed by  $^1H$  NMR spectroscopy. The residue was dissolved in MeCN (5.00 mL). The resulting homogeneous solution was allowed to cool to 0 °C with stirring.  $PhI(OAc)_2$  (322 mg, 1.00 mmol) was added as a solid, and the homogeneous mixture was kept at 0 °C for 30 min before addition of 1M  $H_2SO_4$  (10.0 equiv, 5.00 mL). The aqueous layer was washed with dichloromethane (3 x 5 mL). The organic layers were combined and set aside. The aqueous layer was basified (pH = 10) by dropwise addition of a saturated solution of  $Na_2CO_3$ , and was subsequently washed with dichloromethane (6 x 5 mL). The organic layers were combined, dried over  $MgSO_4$ , and the volatiles were removed *in vacuo*. The dark brown oil was purified by silica gel chromatography (2:1 petroleum ether:EtOAc) to deliver **11** as an off-white oil (100 mg, 0.404 mmol, 81% yield over two steps). IR (neat): 3384 (w), 3321 (w), 2953 (w), 2924 (w), 1784 (m), 1759 (s), 1734 (m), 1601 (m), 1489 (m), 145 (s), 1434 (m), 1244 (m), 1144 (m), 1096 (m), 1050 (m), 1024 (m), 890 (m), 834 (m), 704 (m)  $cm^{-1}$ .  $^1H$  NMR (400 MHz,  $CDCl_3$ ):  $\delta$  7.61-7.59 (2H, m), 7.44-7.36 (3H, m), 6.97 (1H, dd,  $J = 5.8, 1.4$  Hz), 6.14 (1H, dd,  $J = 6.0, 2.0$  Hz), 5.89 (1H, dd,  $J = 2.0, 1.6$  Hz), 3.82 (3H, s), 1.89 (2H, br s).  $^{13}C$  NMR (100 MHz,  $CDCl_3$ ):  $\delta$  173.2, 172.8, 153.4, 137.1, 129.3, 129.2, 125.7, 123.5, 86.7, 65.2, 53.6. HRMS Calcd for  $C_{13}H_{14}NO_4$  [M + H]: 248.09228; Found: 248.09293.  $[\alpha]_D^{26} = +94.45$  ( $c = 0.733$ ,  $CDCl_3$ ) for a >98% ee sample.

**Experimental procedure for  $SnCl_2$ -mediated reduction of **7a**:** A 100 mL round bottom flask was charged with **6a** (398 mg, 1.00 mmol),  $SnCl_2$  (1.14 g, 6.00 mmol), and ethanol (20.0 mL). The round bottom flask was fitted with a reflux condenser, and the mixture was allowed to warm to 65 °C with stirring. The resulting homogeneous solution was kept at 65 °C for 15 h before careful addition of a saturated solution of  $NaHCO_3$ . The aqueous layer was washed with EtOAc (3 x 100 mL). The organic layers were combined, dried over  $MgSO_4$ , and the volatiles were

removed *in vacuo*. The dark brown oil residue was purified by silica gel chromatography (1:1 petroleum ether:EtOAc) to afford **10a** as an off-white solid (285 mg, 0.771 mmol, 77% yield).

**10a**: IR (neat): 3445 (w), 3356 (w), 2951 (w), 1785 (w), 1735 (s), 1616 (m), 1592 (m), 1512 (s), 1458 (m), 1429 (m), 1283 (m), 1238 (s), 1199 (s), 1166 (m), 1095 (m), 1061 (m), 1031 (m), 1004 (m), 948 (m), 906 (m), 836 (m), 826 (m), 795 (m), 725 (s), 696 (s), 612 (m)  $\text{cm}^{-1}$ .  $^1\text{H}$  NMR (400 MHz,  $\text{CDCl}_3$ ):  $\delta$  7.50 (2H, dd,  $J = 8.0, 1.5$  Hz), 7.46 (1H, dd,  $J = 5.8, 1.5$  Hz), 7.36-7.29 (3H, m), 6.19 (1H, d,  $J = 2.2$  Hz), 5.98 (1H, d,  $J = 4.8$  Hz), 5.96 (1H, d,  $J = 1.8$  Hz), 5.90 (1H, dd,  $J = 8.4, 2.6$  Hz), 5.83 (1H, dd,  $J = 5.9, 2.2$  Hz), 5.10 (1H, br s), 3.76 (3H, s), 3.69 (3H, s), 3.37 (2H, br s).  $^{13}\text{C}$  NMR (100 MHz,  $\text{CDCl}_3$ ):  $\delta$  172.6, 172.2, 154.1, 150.1, 140.2, 136.5, 128.9, 128.8, 127.6, 126.2, 122.3, 117.4, 106.8, 99.8, 84.5, 69.9, 55.8, 53.4. HRMS Calcd for  $\text{C}_{20}\text{H}_{21}\text{N}_2\text{O}_5$  [M + H]: 369.14505; Found: 369.14474.  $[\alpha]_{\text{D}}^{25} = +76.25$  ( $c = 1.00$ ,  $\text{CHCl}_3$ ) for a >98% ee sample.

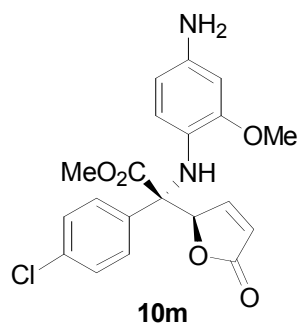

**10m**: IR (neat): 3444 (w, br), 3363 (w, br), 3098 (w, br), 3010 (w, br), 2850 (w, br), 2846 (w, br), 1763 (m), 1737 (m), 1515 (m), 1523 (m), 1463 (m), 1250 (s), 1201 (m), 1090 (m), 1026 (m), 947 (m), 892 (m), 821 (m)  $\text{cm}^{-1}$ .  $^1\text{H}$  NMR (400 MHz,  $\text{CDCl}_3$ ):  $\delta$  7.54-7.50 (2H, m), 7.45 (1H, dd,  $J = 5.9, 1.8$  Hz), 7.35-7.32 (2H, m), 6.23 (1H, d,  $J = 2.2$  Hz), 6.01-5.94 (3H, m), 5.90 (1H, t,  $J = 1.8$  Hz), 5.10 (1H, br s), 3.82 (3H, s), 3.72 (3H, s), 3.38 (2H, br s).  $^{13}\text{C}$  NMR (100 MHz,  $\text{CDCl}_3$ ):  $\delta$  172.2, 171.5, 153.6, 150.0, 140.1, 135.0, 134.6, 129.3, 128.9, 125.6, 122.7, 117.5, 106.8, 99.6, 84.2, 69.3, 55.7, 53.4. HRMS Calcd for  $\text{C}_{20}\text{H}_{20}\text{N}_2\text{O}_5\text{Cl}$  [M + H]: 403.10607; Found: 403.10422.  $[\alpha]_{\text{D}}^{23} = +41.8$  ( $c = 0.500$ ,  $\text{CHCl}_3$ ) for a >98% ee sample. The enantiomeric purity of the compound was determined by chiral HPLC analysis (OJ, 70:30 hexanes:*i*-PrOH, 1 mL/min, 254 nm):  $t_{\text{R}}$  of **10m**: 40.0 min (major) and 79.9 min (minor)

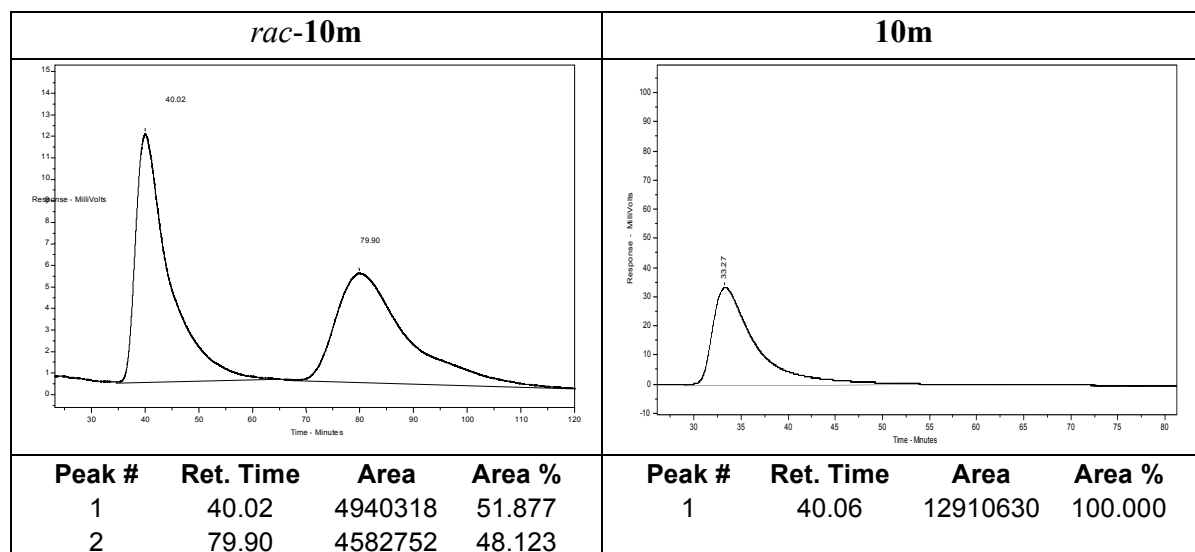

**Experimental procedure for PhI(OAc)<sub>2</sub> mediated deprotection of 10a:** A 13x100 mm test tube was charged with aniline **10a** (36.8 mg, 0.100 mmol) and acetonitrile (1.00 mL). The resulting homogeneous solution was allowed to cool to 0 °C with stirring. PhI(OAc)<sub>2</sub> (64.4 mg, 0.200 mmol) was added as a solid, and the resulting homogeneous solution was kept at 0 °C for 30 min before addition of 1M H<sub>2</sub>SO<sub>4</sub> (10.0 equiv, 1.00 mL). The aqueous layer was washed with dichloromethane (3 x 2 mL). The organic layers were combined and set aside. The aqueous layer was basified (pH = 10) by dropwise addition of a saturated solution of Na<sub>2</sub>CO<sub>3</sub>, and was subsequently washed with dichloromethane (6 x 2 mL). The organic layers were combined, dried over MgSO<sub>4</sub>, and the volatiles were removed *in vacuo*. The resulting brown oil residue was purified by silica gel chromatography (2:1 petroleum ether:EtOAc) to furnish **11** as an off-white oil (21.0 mg, 0.0849 mmol, 85% yield).

**Experimental procedure for synthesis of Ag-based complex 12:** A 50 mL round bottom flask was charged with **1** (203 mg, 0.400 mmol), AgOAc (66.8 mg, 0.400 mmol), and THF (5.0 mL). The mixture was allowed to stir at 25 °C for 5 min, and was then filtered through a pad of Celite<sup>®</sup> into a vial. Petroleum ether was added dropwise to the resulting homogeneous solution until the solution became slightly cloudy. At this point, THF was added dropwise until the solution was again clear, and the vial was sealed and stored in the dark for 12 hours. The resulting colorless crystals were isolated through filtration (193 mg, 0.325 mmol, 81% yield). mp = 128–132 °C. IR (neat): 3249 (w), 3057 (w), 2954 (m), 2865 (w), 1687 (m), 1627 (w), 1545 (m), 1508 (s), 1479 (m), 1460 (m), 1436 (m), 1409 (m), 1292 (m), 1236 (s), 1160 (s), 1097 (m), 1068 (m), 1031 (m), 826 (s), 798 (m), 756 (s), 690 (s), 505 (s) cm<sup>-1</sup>. <sup>1</sup>H NMR (400 MHz, CDCl<sub>3</sub>): δ 10.03 (1H, br s), 9.12 (1H, br s), 8.20 (1H, d, *J* = 6.0 Hz), 7.59-7.47 (5H, m), 7.42-7.20 (7H, m), 7.14 (2H, t, *J* = 7.6 Hz), 6.89 (1H, t, *J* = 7.6 Hz), 6.79 (2H, ddd, *J* = 9.2, 3.2, 2.2 Hz), 3.79 (1H, br s), 3.69 (3H, s), 2.08 (1.5H, s, *AgOAc*), 0.73 (9H, s). <sup>13</sup>C NMR (100 MHz, CDCl<sub>3</sub>): δ 187.7, 178.0, 167.9, 160.3, 160.2, 155.7, 138.8, 138.7, 135.0, 134.8, 134.3, 134.1, 133.3, 132.8, 132.5, 132.2, 131.0, 130.7, 130.5, 130.4, 130.3, 129.6, 129.3, 129.2, 129.16, 129.1, 120.7, 113.4, 82.5, 54.7, 34.9, 26.3. [ $\alpha$ ]<sub>D</sub><sup>23</sup> = -54.26 (*c* = 1.00, CHCl<sub>3</sub>).

**Experimental procedure for synthesis of powder Ag-ligand complex:** A 50 mL round bottom flask was charged with **1** (200 mg, 0.393 mmol), AgOAc (65.6 mg, 0.393 mmol), and THF (5.0 mL). The mixture was allowed to stir at 25 °C for 5 min, and was subsequently filtered through a pad of Celite<sup>®</sup>. Volatiles were removed *in vacuo* to give a white powder (258.5 mg, 0.277 mmol, 71% yield). mp = 148-153 °C. IR (neat): 3119 (w), 2951 (w), 2833 (w), 1648 (w), 1545 (m), 1509 (s), 1478 (m), 1462 (m), 1435 (m), 1400 (m), 1362 (m), 1234 (s), 1163 (m), 1095 (m), 1032 (m), 828 (m), 744 (m), 693 (s), 658 (s), 484 (s) cm<sup>-1</sup>. <sup>1</sup>H NMR (400 MHz, CDCl<sub>3</sub>): δ 10.14 (1H, br s), 9.17 (1H, br s), 8.18 (1H, d, *J* = 6.4 Hz), 7.57-7.55 (3H, m), 7.50 (2H, dd, *J* = 7.4, 3.6 Hz), 7.41-7.27 (7H, m), 7.19 (2H, t, *J* = 6.6 Hz), 6.86 (1H, t, *J* = 8.2 Hz), 6.72 (2H, d, *J* = 8.8 Hz), 3.93 (1H, br s), 3.69 (3H, s), 2.03 (2H, s, *AgOAc*), 0.72 (9H, s).

$^{13}\text{C}$  NMR (100 MHz,  $\text{CDCl}_3$ ):  $\delta$  178.0, 168.0, 160.3, 160.1, 155.7, 138.7, 138.67, 135.1, 134.9, 134.4, 134.2, 133.3, 132.9, 132.4, 132.45, 132.2, 131.8, 130.9, 130.8, 130.6, 130.5, 129.8, 129.4, 129.3, 129.15, 120.8, 113.4, 82.3, 54.7, 34.9, 26.4, 23.0.  $[\alpha]^{23}_{\text{D}} = -69.25$  ( $c = 1.00$ ,  $\text{CHCl}_3$ ).

■ X-ray crystal structure of  $\alpha$ -ketoimine ester 4a:

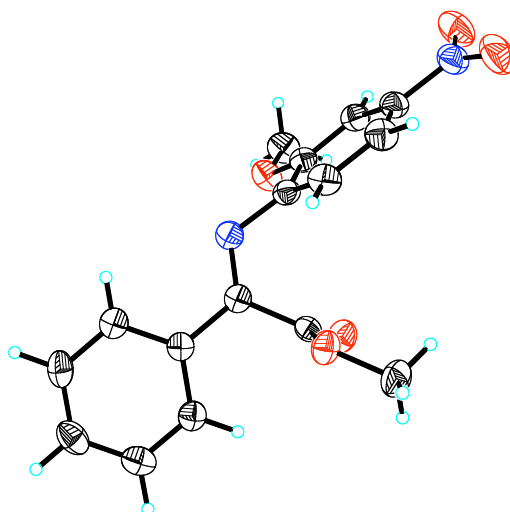

**Table 1.** Crystal data and structure refinement for **4a**

|                      |                                                  |                              |
|----------------------|--------------------------------------------------|------------------------------|
| Identification code  | lcw07                                            |                              |
| Empirical formula    | $\text{C}_{16}\text{H}_{14}\text{N}_2\text{O}_5$ |                              |
| Formula weight       | 314.29                                           |                              |
| Temperature          | 193(2) K                                         |                              |
| Wavelength           | 0.71073 Å                                        |                              |
| Crystal system       | Trilinic                                         |                              |
| Space group          | $P -1$                                           |                              |
| Unit cell dimensions | $a = 8.595(2)$ Å                                 | $\alpha = 71.928(5)^\circ$ . |
|                      | $b = 9.799(3)$ Å                                 | $\beta = 85.027(5)^\circ$ .  |
|                      | $c = 10.014(3)$ Å                                | $\gamma = 68.533(5)^\circ$ . |
| Volume               | $745.9(3)$ Å <sup>3</sup>                        |                              |
| Z                    | 2                                                |                              |
| Density (calculated) | 1.399 Mg/m <sup>3</sup>                          |                              |

|                                   |                                             |
|-----------------------------------|---------------------------------------------|
| Absorption coefficient            | 0.106 mm <sup>-1</sup>                      |
| F(000)                            | 328                                         |
| Crystal size                      | 0.16 x 0.12 x 0.09 mm <sup>3</sup>          |
| Theta range for data collection   | 2.14 to 28.38°.                             |
| Index ranges                      | -11<=h<=8, -13<=k<=13, -13<=l<=13           |
| Reflections collected             | 5715                                        |
| Independent reflections           | 3706 [R(int) = 0.0241]                      |
| Completeness to theta = 28.38°    | 99.1 %                                      |
| Absorption correction             | Semi-empirical from equivalents             |
| Max. and min. transmission        | 0.9905 and 0.9833                           |
| Refinement method                 | Full-matrix least-squares on F <sup>2</sup> |
| Data / restraints / parameters    | 3706 / 0 / 264                              |
| Goodness-of-fit on F <sup>2</sup> | 1.016                                       |
| Final R indices [I>2sigma(I)]     | R1 = 0.0510, wR2 = 0.1048                   |
| R indices (all data)              | R1 = 0.0898, wR2 = 0.1220                   |
| Extinction coefficient            | noref                                       |
| Largest diff. peak and hole       | 0.193 and -0.225 e.Å <sup>-3</sup>          |

**Table 2.** Atomic coordinates ( $\times 10^4$ ) and equivalent isotropic displacement parameters ( $\text{\AA}^2 \times 10^3$ ).  $U(\text{eq})$  is defined as one third of the trace of the orthogonalized  $U^{ij}$  tensor

|       | x        | y        | z        | U(eq) |
|-------|----------|----------|----------|-------|
| O(1)  | 1737(2)  | 5641(1)  | 4945(1)  | 35(1) |
| O(2)  | 3939(2)  | 5382(1)  | 3545(1)  | 39(1) |
| O(3)  | -1708(2) | 10323(2) | -1104(2) | 60(1) |
| O(4)  | -202(2)  | 9249(2)  | -2610(2) | 56(1) |
| O(5)  | 3282(2)  | 3972(1)  | 370(1)   | 38(1) |
| N(1)  | 1872(2)  | 3621(2)  | 2895(1)  | 31(1) |
| N(2)  | -696(2)  | 9209(2)  | -1416(2) | 43(1) |
| C(1)  | 2546(2)  | 3578(2)  | 4003(2)  | 27(1) |
| C(2)  | 3142(2)  | 2171(2)  | 5203(2)  | 27(1) |
| C(3)  | 2748(2)  | 894(2)   | 5276(2)  | 33(1) |
| C(4)  | 3346(3)  | -426(2)  | 6390(2)  | 40(1) |
| C(5)  | 4352(3)  | -503(2)  | 7431(2)  | 42(1) |
| C(6)  | 4747(2)  | 754(2)   | 7368(2)  | 39(1) |
| C(7)  | 4143(2)  | 2086(2)  | 6265(2)  | 32(1) |
| C(8)  | 2839(2)  | 4967(2)  | 4119(2)  | 27(1) |
| C(9)  | 1886(3)  | 7004(2)  | 5123(3)  | 44(1) |
| C(10) | 1243(2)  | 5045(2)  | 1828(2)  | 29(1) |
| C(11) | -111(2)  | 6247(2)  | 2049(2)  | 36(1) |
| C(12) | -756(2)  | 7621(2)  | 998(2)   | 38(1) |
| C(13) | -44(2)   | 7752(2)  | -288(2)  | 34(1) |
| C(14) | 1296(2)  | 6565(2)  | -565(2)  | 34(1) |
| C(15) | 1945(2)  | 5204(2)  | 494(2)   | 30(1) |
| C(16) | 4072(3)  | 4118(3)  | -960(2)  | 43(1) |



**Table 3.** Bond lengths [Å] and angles [°]

|             |            |
|-------------|------------|
| O(1)-C(8)   | 1.3276(19) |
| O(1)-C(9)   | 1.452(2)   |
| O(2)-C(8)   | 1.196(2)   |
| O(3)-N(2)   | 1.231(2)   |
| O(4)-N(2)   | 1.227(2)   |
| O(5)-C(15)  | 1.359(2)   |
| O(5)-C(16)  | 1.432(2)   |
| N(1)-C(1)   | 1.278(2)   |
| N(1)-C(10)  | 1.415(2)   |
| N(2)-C(13)  | 1.467(2)   |
| C(1)-C(2)   | 1.473(2)   |
| C(1)-C(8)   | 1.512(2)   |
| C(2)-C(7)   | 1.390(2)   |
| C(2)-C(3)   | 1.391(2)   |
| C(3)-C(4)   | 1.378(3)   |
| C(3)-H(3)   | 0.918(19)  |
| C(4)-C(5)   | 1.378(3)   |
| C(4)-H(4)   | 0.954(19)  |
| C(5)-C(6)   | 1.375(3)   |
| C(5)-H(5)   | 0.96(2)    |
| C(6)-C(7)   | 1.379(3)   |
| C(6)-H(6)   | 0.98(2)    |
| C(7)-H(7)   | 0.956(18)  |
| C(9)-H(9A)  | 0.98(2)    |
| C(9)-H(9B)  | 0.996(19)  |
| C(9)-H(9C)  | 0.95(2)    |
| C(10)-C(11) | 1.380(2)   |
| C(10)-C(15) | 1.405(2)   |
| C(11)-C(12) | 1.380(3)   |
| C(11)-H(11) | 0.956(19)  |
| C(12)-C(13) | 1.366(3)   |
| C(12)-H(12) | 0.949(19)  |
| C(13)-C(14) | 1.386(2)   |
| C(14)-C(15) | 1.376(2)   |
| C(14)-H(14) | 0.941(18)  |

|                  |            |
|------------------|------------|
| C(16)-H(16A)     | 0.98(2)    |
| C(16)-H(16B)     | 1.01(2)    |
| C(16)-H(16C)     | 0.99(2)    |
| C(8)-O(1)-C(9)   | 116.16(15) |
| C(15)-O(5)-C(16) | 117.08(15) |
| C(1)-N(1)-C(10)  | 118.58(14) |
| O(4)-N(2)-O(3)   | 123.85(17) |
| O(4)-N(2)-C(13)  | 118.39(17) |
| O(3)-N(2)-C(13)  | 117.76(17) |
| N(1)-C(1)-C(2)   | 122.37(15) |
| N(1)-C(1)-C(8)   | 121.16(15) |
| C(2)-C(1)-C(8)   | 116.42(15) |
| C(7)-C(2)-C(3)   | 118.90(17) |
| C(7)-C(2)-C(1)   | 120.37(15) |
| C(3)-C(2)-C(1)   | 120.71(16) |
| C(4)-C(3)-C(2)   | 120.00(19) |
| C(4)-C(3)-H(3)   | 121.0(12)  |
| C(2)-C(3)-H(3)   | 118.9(12)  |
| C(5)-C(4)-C(3)   | 120.65(19) |
| C(5)-C(4)-H(4)   | 119.9(11)  |
| C(3)-C(4)-H(4)   | 119.4(12)  |
| C(6)-C(5)-C(4)   | 119.73(19) |
| C(6)-C(5)-H(5)   | 119.4(13)  |
| C(4)-C(5)-H(5)   | 120.8(13)  |
| C(5)-C(6)-C(7)   | 120.2(2)   |
| C(5)-C(6)-H(6)   | 120.3(12)  |
| C(7)-C(6)-H(6)   | 119.5(12)  |
| C(6)-C(7)-C(2)   | 120.50(18) |
| C(6)-C(7)-H(7)   | 120.3(11)  |
| C(2)-C(7)-H(7)   | 119.2(11)  |
| O(2)-C(8)-O(1)   | 125.09(16) |
| O(2)-C(8)-C(1)   | 123.67(15) |
| O(1)-C(8)-C(1)   | 111.23(14) |
| O(1)-C(9)-H(9A)  | 112.3(12)  |
| O(1)-C(9)-H(9B)  | 105.1(11)  |
| H(9A)-C(9)-H(9B) | 113.6(16)  |

|                     |            |
|---------------------|------------|
| O(1)-C(9)-H(9C)     | 109.5(13)  |
| H(9A)-C(9)-H(9C)    | 105.0(18)  |
| H(9B)-C(9)-H(9C)    | 111.4(16)  |
| C(11)-C(10)-C(15)   | 119.41(16) |
| C(11)-C(10)-N(1)    | 121.18(15) |
| C(15)-C(10)-N(1)    | 119.30(15) |
| C(10)-C(11)-C(12)   | 121.28(17) |
| C(10)-C(11)-H(11)   | 119.8(11)  |
| C(12)-C(11)-H(11)   | 119.0(11)  |
| C(13)-C(12)-C(11)   | 118.17(18) |
| C(13)-C(12)-H(12)   | 118.8(12)  |
| C(11)-C(12)-H(12)   | 123.0(12)  |
| C(12)-C(13)-C(14)   | 122.52(17) |
| C(12)-C(13)-N(2)    | 119.09(17) |
| C(14)-C(13)-N(2)    | 118.38(16) |
| C(15)-C(14)-C(13)   | 118.94(17) |
| C(15)-C(14)-H(14)   | 123.8(10)  |
| C(13)-C(14)-H(14)   | 117.2(10)  |
| O(5)-C(15)-C(14)    | 124.72(15) |
| O(5)-C(15)-C(10)    | 115.59(15) |
| C(14)-C(15)-C(10)   | 119.66(16) |
| O(5)-C(16)-H(16A)   | 106.0(12)  |
| O(5)-C(16)-H(16B)   | 109.2(11)  |
| H(16A)-C(16)-H(16B) | 109.2(16)  |
| O(5)-C(16)-H(16C)   | 110.3(12)  |
| H(16A)-C(16)-H(16C) | 108.9(16)  |
| H(16B)-C(16)-H(16C) | 113.1(17)  |

---

Symmetry transformations used to generate equivalent atoms:

**Table 4.** Anisotropic displacement parameters ( $\text{\AA}^2 \times 10^3$ ). The anisotropic displacement factor exponent takes the form:  $-2\pi^2 [ h^2 a^{*2} U^{11} + \dots + 2 h k a^* b^* U^{12} ]$

|       | $U^{11}$ | $U^{22}$ | $U^{33}$ | $U^{23}$ | $U^{13}$ | $U^{12}$ |
|-------|----------|----------|----------|----------|----------|----------|
| O(1)  | 37(1)    | 32(1)    | 38(1)    | -17(1)   | 10(1)    | -13(1)   |
| O(2)  | 42(1)    | 43(1)    | 38(1)    | -13(1)   | 11(1)    | -24(1)   |
| O(3)  | 51(1)    | 39(1)    | 70(1)    | -7(1)    | -8(1)    | 0(1)     |
| O(4)  | 62(1)    | 54(1)    | 38(1)    | 6(1)     | -1(1)    | -20(1)   |
| O(5)  | 41(1)    | 37(1)    | 29(1)    | -11(1)   | 9(1)     | -8(1)    |
| N(1)  | 34(1)    | 34(1)    | 26(1)    | -10(1)   | 6(1)     | -15(1)   |
| N(2)  | 36(1)    | 40(1)    | 48(1)    | -2(1)    | -8(1)    | -14(1)   |
| C(1)  | 25(1)    | 31(1)    | 26(1)    | -12(1)   | 9(1)     | -12(1)   |
| C(2)  | 25(1)    | 29(1)    | 28(1)    | -12(1)   | 8(1)     | -8(1)    |
| C(3)  | 32(1)    | 34(1)    | 35(1)    | -14(1)   | 7(1)     | -13(1)   |
| C(4)  | 47(1)    | 26(1)    | 46(1)    | -11(1)   | 10(1)    | -14(1)   |
| C(5)  | 45(1)    | 31(1)    | 36(1)    | -6(1)    | 3(1)     | -2(1)    |
| C(6)  | 35(1)    | 42(1)    | 33(1)    | -13(1)   | 1(1)     | -6(1)    |
| C(7)  | 34(1)    | 32(1)    | 33(1)    | -13(1)   | 7(1)     | -12(1)   |
| C(8)  | 29(1)    | 29(1)    | 21(1)    | -5(1)    | 2(1)     | -10(1)   |
| C(9)  | 47(1)    | 34(1)    | 54(1)    | -22(1)   | 3(1)     | -11(1)   |
| C(10) | 32(1)    | 34(1)    | 25(1)    | -9(1)    | 1(1)     | -15(1)   |
| C(11) | 32(1)    | 44(1)    | 32(1)    | -12(1)   | 7(1)     | -14(1)   |
| C(12) | 28(1)    | 40(1)    | 42(1)    | -14(1)   | 3(1)     | -8(1)    |
| C(13) | 30(1)    | 35(1)    | 34(1)    | -6(1)    | -4(1)    | -13(1)   |
| C(14) | 35(1)    | 41(1)    | 27(1)    | -9(1)    | 4(1)     | -19(1)   |
| C(15) | 29(1)    | 34(1)    | 28(1)    | -12(1)   | 1(1)     | -12(1)   |
| C(16) | 45(1)    | 50(1)    | 32(1)    | -18(1)   | 12(1)    | -13(1)   |

**Table 5.** Hydrogen coordinates ( $\times 10^4$ ) and isotropic displacement parameters ( $\text{\AA}^2 \times 10^3$ )

|        | x         | y         | z         | U(eq) |
|--------|-----------|-----------|-----------|-------|
| H(3)   | 2060(20)  | 960(20)   | 4590(20)  | 37(5) |
| H(4)   | 3100(20)  | -1310(20) | 6415(19)  | 39(5) |
| H(5)   | 4800(30)  | -1430(30) | 8190(20)  | 58(6) |
| H(6)   | 5460(20)  | 710(20)   | 8100(20)  | 49(6) |
| H(7)   | 4450(20)  | 2950(20)  | 6202(18)  | 33(5) |
| H(9A)  | 3010(30)  | 6820(20)  | 5440(20)  | 48(6) |
| H(9B)  | 1000(30)  | 7330(20)  | 5790(20)  | 44(5) |
| H(9C)  | 1710(30)  | 7780(30)  | 4240(20)  | 58(7) |
| H(11)  | -620(20)  | 6130(20)  | 2950(20)  | 39(5) |
| H(12)  | -1670(20) | 8470(20)  | 1127(19)  | 48(6) |
| H(14)  | 1710(20)  | 6747(19)  | -1479(19) | 32(5) |
| H(16A) | 5020(30)  | 3160(20)  | -850(20)  | 53(6) |
| H(16B) | 4500(20)  | 5000(20)  | -1180(20) | 50(6) |
| H(16C) | 3300(30)  | 4240(20)  | -1690(20) | 52(6) |

**Table 6.** Torsion angles [°]

|                         |             |
|-------------------------|-------------|
| C(10)-N(1)-C(1)-C(2)    | 176.19(14)  |
| C(10)-N(1)-C(1)-C(8)    | -6.5(2)     |
| N(1)-C(1)-C(2)-C(7)     | 167.75(16)  |
| C(8)-C(1)-C(2)-C(7)     | -9.7(2)     |
| N(1)-C(1)-C(2)-C(3)     | -10.6(2)    |
| C(8)-C(1)-C(2)-C(3)     | 171.92(15)  |
| C(7)-C(2)-C(3)-C(4)     | 0.2(2)      |
| C(1)-C(2)-C(3)-C(4)     | 178.58(15)  |
| C(2)-C(3)-C(4)-C(5)     | -0.9(3)     |
| C(3)-C(4)-C(5)-C(6)     | 0.9(3)      |
| C(4)-C(5)-C(6)-C(7)     | -0.3(3)     |
| C(5)-C(6)-C(7)-C(2)     | -0.4(3)     |
| C(3)-C(2)-C(7)-C(6)     | 0.5(2)      |
| C(1)-C(2)-C(7)-C(6)     | -177.95(15) |
| C(9)-O(1)-C(8)-O(2)     | 1.3(3)      |
| C(9)-O(1)-C(8)-C(1)     | -179.37(16) |
| N(1)-C(1)-C(8)-O(2)     | -75.9(2)    |
| C(2)-C(1)-C(8)-O(2)     | 101.57(19)  |
| N(1)-C(1)-C(8)-O(1)     | 104.73(17)  |
| C(2)-C(1)-C(8)-O(1)     | -77.80(18)  |
| C(1)-N(1)-C(10)-C(11)   | -66.5(2)    |
| C(1)-N(1)-C(10)-C(15)   | 117.43(18)  |
| C(15)-C(10)-C(11)-C(12) | -2.1(3)     |
| N(1)-C(10)-C(11)-C(12)  | -178.15(17) |
| C(10)-C(11)-C(12)-C(13) | 1.6(3)      |
| C(11)-C(12)-C(13)-C(14) | -0.4(3)     |
| C(11)-C(12)-C(13)-N(2)  | -179.23(17) |
| O(4)-N(2)-C(13)-C(12)   | -170.46(18) |
| O(3)-N(2)-C(13)-C(12)   | 9.7(3)      |
| O(4)-N(2)-C(13)-C(14)   | 10.6(3)     |
| O(3)-N(2)-C(13)-C(14)   | -169.19(16) |
| C(12)-C(13)-C(14)-C(15) | -0.4(3)     |
| N(2)-C(13)-C(14)-C(15)  | 178.50(16)  |
| C(16)-O(5)-C(15)-C(14)  | 0.6(3)      |
| C(16)-O(5)-C(15)-C(10)  | -177.48(17) |

|                         |             |
|-------------------------|-------------|
| C(13)-C(14)-C(15)-O(5)  | -178.08(16) |
| C(13)-C(14)-C(15)-C(10) | -0.1(3)     |
| C(11)-C(10)-C(15)-O(5)  | 179.44(15)  |
| N(1)-C(10)-C(15)-O(5)   | -4.4(2)     |
| C(11)-C(10)-C(15)-C(14) | 1.3(3)      |
| N(1)-C(10)-C(15)-C(14)  | 177.44(16)  |

---

Symmetry transformations used to generate equivalent atoms:

■ X-ray crystal structure of **10m**:

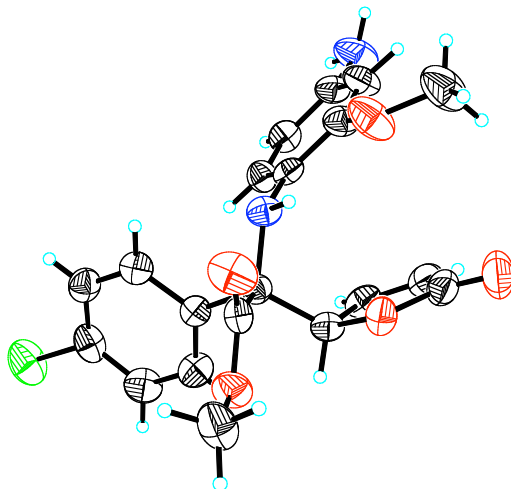

**Table 1.** Crystal data and structure refinement for **10m**

|                                 |                                                                  |          |
|---------------------------------|------------------------------------------------------------------|----------|
| Identification code             | emv01                                                            |          |
| Empirical formula               | C <sub>20</sub> H <sub>19</sub> Cl N <sub>2</sub> O <sub>5</sub> |          |
| Formula weight                  | 402.82                                                           |          |
| Temperature                     | 193(2) K                                                         |          |
| Wavelength                      | 0.71073 Å                                                        |          |
| Crystal system                  | Orthorhombic                                                     |          |
| Space group                     | P2(1)2(1)2(1)                                                    |          |
| Unit cell dimensions            | a = 8.8375(16) Å                                                 | α = 90°. |
|                                 | b = 11.630(2) Å                                                  | β = 90°. |
|                                 | c = 18.584(3) Å                                                  | γ = 90°. |
| Volume                          | 1910.2(6) Å <sup>3</sup>                                         |          |
| Z                               | 4                                                                |          |
| Density (calculated)            | 1.401 Mg/m <sup>3</sup>                                          |          |
| Absorption coefficient          | 0.235 mm <sup>-1</sup>                                           |          |
| F(000)                          | 840                                                              |          |
| Crystal size                    | 0.1 x 0.1 x 0.05 mm <sup>3</sup>                                 |          |
| Theta range for data collection | 2.07 to 28.31°.                                                  |          |
| Index ranges                    | -11 ≤ h ≤ 10, -11 ≤ k ≤ 15, -24 ≤ l ≤ 18                         |          |
| Reflections collected           | 14569                                                            |          |
| Independent reflections         | 4754 [R(int) = 0.0728]                                           |          |
| Completeness to theta = 28.31°  | 100.0 %                                                          |          |



|                                   |                                             |
|-----------------------------------|---------------------------------------------|
| Absorption correction             | Empirical                                   |
| Max. and min. transmission        | none and none                               |
| Refinement method                 | Full-matrix least-squares on F <sup>2</sup> |
| Data / restraints / parameters    | 4754 / 0 / 329                              |
| Goodness-of-fit on F <sup>2</sup> | 0.995                                       |
| Final R indices [I>2sigma(I)]     | R1 = 0.0615, wR2 = 0.1043                   |
| R indices (all data)              | R1 = 0.1139, wR2 = 0.1226                   |
| Absolute structure parameter      | 0.05(9)                                     |
| Largest diff. peak and hole       | 0.247 and -0.171 e.Å <sup>-3</sup>          |

**Table 2.** Atomic coordinates ( $\times 10^4$ ) and equivalent isotropic displacement parameters ( $\text{\AA}^2 \times 10^3$ )  
 $U(\text{eq})$  is defined as one third of the trace of the orthogonalized  $U^{ij}$  tensor

|       | x       | y       | z       | $U(\text{eq})$ |
|-------|---------|---------|---------|----------------|
| Cl(1) | -66(1)  | 2810(1) | 119(1)  | 70(1)          |
| O(2)  | 6754(2) | 5252(2) | 2680(1) | 41(1)          |
| O(5)  | 3296(3) | 5135(2) | 2927(1) | 46(1)          |
| O(4)  | 3827(3) | 6925(2) | 2592(1) | 56(1)          |
| C(9)  | 5920(4) | 4578(3) | 2162(2) | 38(1)          |
| N(2)  | 5285(3) | 6322(2) | 1433(1) | 36(1)          |
| C(15) | 3491(3) | 4680(3) | 1411(2) | 33(1)          |
| C(8)  | 4672(3) | 5354(3) | 1836(2) | 33(1)          |
| O(3)  | 9175(3) | 5670(3) | 2898(2) | 65(1)          |
| C(13) | 3873(3) | 5914(3) | 2491(2) | 35(1)          |
| C(10) | 7112(4) | 4125(3) | 1672(2) | 42(1)          |
| C(12) | 8272(4) | 5191(3) | 2528(2) | 46(1)          |
| C(3)  | 6020(4) | 5485(3) | 255(2)  | 38(1)          |
| C(20) | 2579(4) | 5263(3) | 916(2)  | 42(1)          |
| C(4)  | 6281(3) | 6185(3) | 841(2)  | 33(1)          |
| O(1)  | 7816(3) | 7506(2) | 1442(1) | 63(1)          |
| C(6)  | 8558(5) | 6842(3) | 255(2)  | 50(1)          |
| C(17) | 2152(4) | 2940(3) | 1109(2) | 50(1)          |
| C(1)  | 8281(4) | 6123(3) | -332(2) | 43(1)          |
| C(16) | 3237(4) | 3522(3) | 1500(2) | 45(1)          |
| C(18) | 1313(4) | 3529(3) | 618(2)  | 46(1)          |
| C(5)  | 7588(4) | 6862(3) | 831(2)  | 42(1)          |
| C(19) | 1511(4) | 4688(4) | 516(2)  | 44(1)          |
| C(14) | 2593(5) | 5574(5) | 3577(2) | 57(1)          |
| C(11) | 8438(4) | 4475(3) | 1895(2) | 48(1)          |
| C(2)  | 7014(4) | 5451(3) | -320(2) | 40(1)          |
| N(1)  | 9333(4) | 6057(4) | -887(2) | 64(1)          |
| C(7)  | 9313(6) | 7873(5) | 1603(3) | 73(2)          |

**Table 3.** Bond lengths [Å] and angles [°]

|                  |          |
|------------------|----------|
| Cl(1)-C(18)      | 1.745(3) |
| O(2)-C(12)       | 1.373(4) |
| O(2)-C(9)        | 1.445(4) |
| O(5)-C(13)       | 1.318(4) |
| O(5)-C(14)       | 1.451(5) |
| O(4)-C(13)       | 1.192(4) |
| C(9)-C(10)       | 1.489(5) |
| C(9)-C(8)        | 1.549(4) |
| N(2)-C(4)        | 1.418(4) |
| N(2)-C(8)        | 1.456(4) |
| C(15)-C(16)      | 1.375(5) |
| C(15)-C(20)      | 1.399(4) |
| C(15)-C(8)       | 1.526(4) |
| C(8)-C(13)       | 1.550(4) |
| O(3)-C(12)       | 1.192(4) |
| C(10)-C(11)      | 1.307(5) |
| C(12)-C(11)      | 1.448(5) |
| C(3)-C(4)        | 1.378(4) |
| C(3)-C(2)        | 1.385(4) |
| C(20)-C(19)      | 1.375(5) |
| C(4)-C(5)        | 1.398(4) |
| O(1)-C(5)        | 1.374(4) |
| O(1)-C(7)        | 1.423(5) |
| C(6)-C(5)        | 1.372(5) |
| C(6)-C(1)        | 1.396(5) |
| C(17)-C(18)      | 1.361(5) |
| C(17)-C(16)      | 1.381(5) |
| C(1)-C(2)        | 1.366(5) |
| C(1)-N(1)        | 1.391(5) |
| C(18)-C(19)      | 1.372(5) |
| C(12)-O(2)-C(9)  | 109.5(3) |
| C(13)-O(5)-C(14) | 115.8(3) |
| O(2)-C(9)-C(10)  | 103.8(3) |
| O(2)-C(9)-C(8)   | 107.9(3) |
| C(10)-C(9)-C(8)  | 118.1(3) |

|                   |          |
|-------------------|----------|
| C(4)-N(2)-C(8)    | 123.0(3) |
| C(16)-C(15)-C(20) | 117.4(3) |
| C(16)-C(15)-C(8)  | 123.5(3) |
| C(20)-C(15)-C(8)  | 119.0(3) |
| N(2)-C(8)-C(15)   | 112.6(2) |
| N(2)-C(8)-C(9)    | 112.8(3) |
| C(15)-C(8)-C(9)   | 112.9(3) |
| N(2)-C(8)-C(13)   | 104.4(3) |
| C(15)-C(8)-C(13)  | 108.1(2) |
| C(9)-C(8)-C(13)   | 105.2(2) |
| O(4)-C(13)-O(5)   | 124.6(3) |
| O(4)-C(13)-C(8)   | 123.6(3) |
| O(5)-C(13)-C(8)   | 111.7(3) |
| C(11)-C(10)-C(9)  | 109.3(3) |
| O(3)-C(12)-O(2)   | 120.7(3) |
| O(3)-C(12)-C(11)  | 132.0(3) |
| O(2)-C(12)-C(11)  | 107.2(3) |
| C(4)-C(3)-C(2)    | 121.4(3) |
| C(19)-C(20)-C(15) | 121.0(4) |
| C(3)-C(4)-C(5)    | 117.5(3) |
| C(3)-C(4)-N(2)    | 125.1(3) |
| C(5)-C(4)-N(2)    | 117.4(3) |
| C(5)-O(1)-C(7)    | 118.3(3) |
| C(5)-C(6)-C(1)    | 120.7(3) |
| C(18)-C(17)-C(16) | 119.0(4) |
| C(2)-C(1)-N(1)    | 121.9(3) |
| C(2)-C(1)-C(6)    | 118.3(3) |
| N(1)-C(1)-C(6)    | 119.7(3) |
| C(15)-C(16)-C(17) | 122.0(4) |
| C(17)-C(18)-C(19) | 121.1(3) |
| C(17)-C(18)-Cl(1) | 119.8(3) |
| C(19)-C(18)-Cl(1) | 119.1(3) |
| C(6)-C(5)-O(1)    | 124.2(3) |
| C(6)-C(5)-C(4)    | 121.1(3) |
| O(1)-C(5)-C(4)    | 114.7(3) |
| C(20)-C(19)-C(18) | 119.4(4) |

C(10)-C(11)-C(12)      110.2(3)

C(1)-C(2)-C(3)        121.0(3)

---

Symmetry transformations used to generate equivalent atoms:

**Table 4.** Anisotropic displacement parameters ( $\text{\AA}^2 \times 10^3$ ) for EMV01. The anisotropic displacement factor exponent takes the form:  $-2\pi^2 [ h^2 a^{*2} U^{11} + \dots + 2 h k a^* b^* U^{12} ]$

|       | U <sup>11</sup> | U <sup>22</sup> | U <sup>33</sup> | U <sup>23</sup> | U <sup>13</sup> | U <sup>12</sup> |
|-------|-----------------|-----------------|-----------------|-----------------|-----------------|-----------------|
| Cl(1) | 61(1)           | 85(1)           | 65(1)           | -23(1)          | -11(1)          | -21(1)          |
| O(2)  | 35(1)           | 52(2)           | 36(1)           | -4(1)           | -2(1)           | 5(1)            |
| O(5)  | 50(1)           | 56(2)           | 33(1)           | -1(1)           | 10(1)           | -2(1)           |
| O(4)  | 65(2)           | 42(2)           | 60(2)           | -16(1)          | 18(1)           | 0(1)            |
| C(9)  | 40(2)           | 38(2)           | 34(2)           | 2(2)            | 3(2)            | -1(2)           |
| N(2)  | 46(2)           | 29(2)           | 32(1)           | -2(1)           | 1(1)            | -1(1)           |
| C(15) | 35(2)           | 34(2)           | 30(2)           | -4(1)           | 4(1)            | 4(2)            |
| C(8)  | 35(2)           | 33(2)           | 31(2)           | 0(1)            | -1(1)           | 0(1)            |
| O(3)  | 42(1)           | 87(2)           | 66(2)           | 0(2)            | -15(1)          | -4(2)           |
| C(13) | 28(2)           | 38(2)           | 38(2)           | -5(2)           | -3(1)           | 0(2)            |
| C(10) | 53(2)           | 40(2)           | 34(2)           | 4(2)            | 2(2)            | 13(2)           |
| C(12) | 38(2)           | 54(2)           | 45(2)           | 9(2)            | -3(2)           | 9(2)            |
| C(3)  | 37(2)           | 40(2)           | 38(2)           | -4(2)           | -2(2)           | -4(2)           |
| C(20) | 43(2)           | 41(2)           | 41(2)           | -1(2)           | 2(2)            | 1(2)            |
| C(4)  | 38(2)           | 30(2)           | 33(2)           | 6(1)            | -2(1)           | 7(1)            |
| O(1)  | 66(2)           | 68(2)           | 55(2)           | -21(1)          | 10(1)           | -28(2)          |
| C(6)  | 52(2)           | 45(2)           | 52(2)           | 3(2)            | 7(2)            | -16(2)          |
| C(17) | 59(2)           | 33(2)           | 56(2)           | -8(2)           | 0(2)            | -8(2)           |
| C(1)  | 50(2)           | 44(2)           | 35(2)           | 8(2)            | 7(2)            | -4(2)           |
| C(16) | 53(2)           | 37(2)           | 43(2)           | -4(2)           | -4(2)           | 4(2)            |
| C(18) | 39(2)           | 60(3)           | 38(2)           | -17(2)          | -2(2)           | -5(2)           |
| C(5)  | 52(2)           | 34(2)           | 39(2)           | -2(2)           | 0(2)            | -6(2)           |
| C(19) | 43(2)           | 52(2)           | 37(2)           | 2(2)            | -1(2)           | 3(2)            |
| C(14) | 49(2)           | 84(4)           | 39(2)           | -14(3)          | 6(2)            | -8(3)           |
| C(11) | 39(2)           | 58(3)           | 46(2)           | 13(2)           | 11(2)           | 15(2)           |
| C(2)  | 49(2)           | 41(2)           | 31(2)           | -6(2)           | -1(2)           | 1(2)            |
| N(1)  | 76(2)           | 69(3)           | 46(2)           | -4(2)           | 18(2)           | -25(2)          |
| C(7)  | 75(3)           | 84(4)           | 61(3)           | -19(3)          | -2(3)           | -36(3)          |

**Table 5.** Hydrogen coordinates ( $\times 10^4$ ) and isotropic displacement parameters ( $\text{\AA}^2 \times 10^3$ )

|       | x         | y        | z         | U(eq)  |
|-------|-----------|----------|-----------|--------|
| H(3)  | 2730(30)  | 6080(30) | 871(14)   | 27(8)  |
| H(2)  | 5220(40)  | 5050(30) | 230(14)   | 37(9)  |
| H(1)  | 6850(30)  | 3650(30) | 1272(16)  | 35(9)  |
| H(8)  | 5650(30)  | 6840(30) | 1769(17)  | 41(9)  |
| H(11) | 1940(30)  | 2170(30) | 1207(14)  | 32(8)  |
| H(5)  | 9780(40)  | 8290(30) | 1244(19)  | 53(11) |
| H(9)  | 9380(40)  | 4290(30) | 1758(17)  | 56(11) |
| H(10) | 5460(30)  | 4010(30) | 2463(15)  | 32(8)  |
| H(6)  | 6780(30)  | 4970(30) | -706(16)  | 36(9)  |
| H(7)  | 8990(50)  | 5630(40) | -1230(20) | 73(15) |
| H(12) | 3770(40)  | 3110(30) | 1834(17)  | 46(10) |
| H(4)  | 9450(40)  | 7280(30) | 287(15)   | 41(9)  |
| H(14) | 1710(50)  | 6120(40) | 3450(20)  | 74(13) |
| H(16) | 950(40)   | 5090(30) | 229(16)   | 35(9)  |
| H(13) | 3220(40)  | 6160(30) | 3807(19)  | 64(12) |
| H(15) | 2450(60)  | 5030(40) | 3850(20)  | 81(18) |
| H(17) | 10080(50) | 7180(40) | 1690(20)  | 95(17) |
| H(18) | 9240(50)  | 8280(40) | 2100(20)  | 97(15) |
| H(19) | 9810(50)  | 6720(40) | -1009(19) | 73(14) |

**Table 6.** Torsion angles [°]

|                         |           |
|-------------------------|-----------|
| C(12)-O(2)-C(9)-C(10)   | -1.2(3)   |
| C(12)-O(2)-C(9)-C(8)    | -127.2(3) |
| C(4)-N(2)-C(8)-C(15)    | -71.6(4)  |
| C(4)-N(2)-C(8)-C(9)     | 57.7(4)   |
| C(4)-N(2)-C(8)-C(13)    | 171.4(2)  |
| C(16)-C(15)-C(8)-N(2)   | 150.1(3)  |
| C(20)-C(15)-C(8)-N(2)   | -31.8(4)  |
| C(16)-C(15)-C(8)-C(9)   | 20.9(4)   |
| C(20)-C(15)-C(8)-C(9)   | -161.0(3) |
| C(16)-C(15)-C(8)-C(13)  | -95.1(4)  |
| C(20)-C(15)-C(8)-C(13)  | 83.0(3)   |
| O(2)-C(9)-C(8)-N(2)     | 63.9(3)   |
| C(10)-C(9)-C(8)-N(2)    | -53.2(4)  |
| O(2)-C(9)-C(8)-C(15)    | -167.0(2) |
| C(10)-C(9)-C(8)-C(15)   | 75.9(4)   |
| O(2)-C(9)-C(8)-C(13)    | -49.3(3)  |
| C(10)-C(9)-C(8)-C(13)   | -166.4(3) |
| C(14)-O(5)-C(13)-O(4)   | -1.2(5)   |
| C(14)-O(5)-C(13)-C(8)   | 176.8(3)  |
| N(2)-C(8)-C(13)-O(4)    | 0.3(4)    |
| C(15)-C(8)-C(13)-O(4)   | -119.9(3) |
| C(9)-C(8)-C(13)-O(4)    | 119.2(3)  |
| N(2)-C(8)-C(13)-O(5)    | -177.8(2) |
| C(15)-C(8)-C(13)-O(5)   | 62.1(3)   |
| C(9)-C(8)-C(13)-O(5)    | -58.8(3)  |
| O(2)-C(9)-C(10)-C(11)   | 1.3(4)    |
| C(8)-C(9)-C(10)-C(11)   | 120.6(3)  |
| C(9)-O(2)-C(12)-O(3)    | -178.6(3) |
| C(9)-O(2)-C(12)-C(11)   | 0.7(4)    |
| C(16)-C(15)-C(20)-C(19) | -2.4(5)   |
| C(8)-C(15)-C(20)-C(19)  | 179.4(3)  |
| C(2)-C(3)-C(4)-C(5)     | 0.1(5)    |
| C(2)-C(3)-C(4)-N(2)     | 176.3(3)  |
| C(8)-N(2)-C(4)-C(3)     | 51.7(4)   |
| C(8)-N(2)-C(4)-C(5)     | -132.0(3) |



|                         |           |
|-------------------------|-----------|
| C(5)-C(6)-C(1)-C(2)     | 0.5(5)    |
| C(5)-C(6)-C(1)-N(1)     | -175.5(4) |
| C(20)-C(15)-C(16)-C(17) | 1.4(5)    |
| C(8)-C(15)-C(16)-C(17)  | 179.6(3)  |
| C(18)-C(17)-C(16)-C(15) | 0.3(5)    |
| C(16)-C(17)-C(18)-C(19) | -1.2(5)   |
| C(16)-C(17)-C(18)-Cl(1) | -179.9(3) |
| C(1)-C(6)-C(5)-O(1)     | 177.1(3)  |
| C(1)-C(6)-C(5)-C(4)     | -1.4(5)   |
| C(7)-O(1)-C(5)-C(6)     | -21.4(6)  |
| C(7)-O(1)-C(5)-C(4)     | 157.1(4)  |
| C(3)-C(4)-C(5)-C(6)     | 1.0(5)    |
| N(2)-C(4)-C(5)-C(6)     | -175.5(3) |
| C(3)-C(4)-C(5)-O(1)     | -177.5(3) |
| N(2)-C(4)-C(5)-O(1)     | 5.9(4)    |
| C(15)-C(20)-C(19)-C(18) | 1.6(5)    |
| C(17)-C(18)-C(19)-C(20) | 0.3(5)    |
| Cl(1)-C(18)-C(19)-C(20) | 179.0(3)  |
| C(9)-C(10)-C(11)-C(12)  | -1.0(4)   |
| O(3)-C(12)-C(11)-C(10)  | 179.4(4)  |
| O(2)-C(12)-C(11)-C(10)  | 0.2(4)    |
| N(1)-C(1)-C(2)-C(3)     | 176.6(3)  |
| C(6)-C(1)-C(2)-C(3)     | 0.6(5)    |
| C(4)-C(3)-C(2)-C(1)     | -0.9(5)   |

---

Symmetry transformations used to generate equivalent atoms:

**Table 7.** Hydrogen bonds for EMV01 [ $\text{\AA}$  and  $^\circ$ ]

| D-H...A             | d(D-H)  | d(H...A) | d(D...A) | $\angle(\text{DHA})$ |
|---------------------|---------|----------|----------|----------------------|
| N(2)-H(8)...O(1)    | 0.93(3) | 2.15(3)  | 2.627(4) | 111(2)               |
| N(1)-H(7)...O(2)#1  | 0.86(4) | 2.36(4)  | 3.215(5) | 169(4)               |
| N(1)-H(19)...N(2)#2 | 0.91(5) | 2.44(5)  | 3.322(5) | 162(3)               |

Symmetry transformations used to generate equivalent atoms:

#1  $-x+3/2, -y+1, z-1/2$  #2  $x+1/2, -y+3/2, -z$

■ X-ray crystal structure of AgOAc-1 complex **12**:

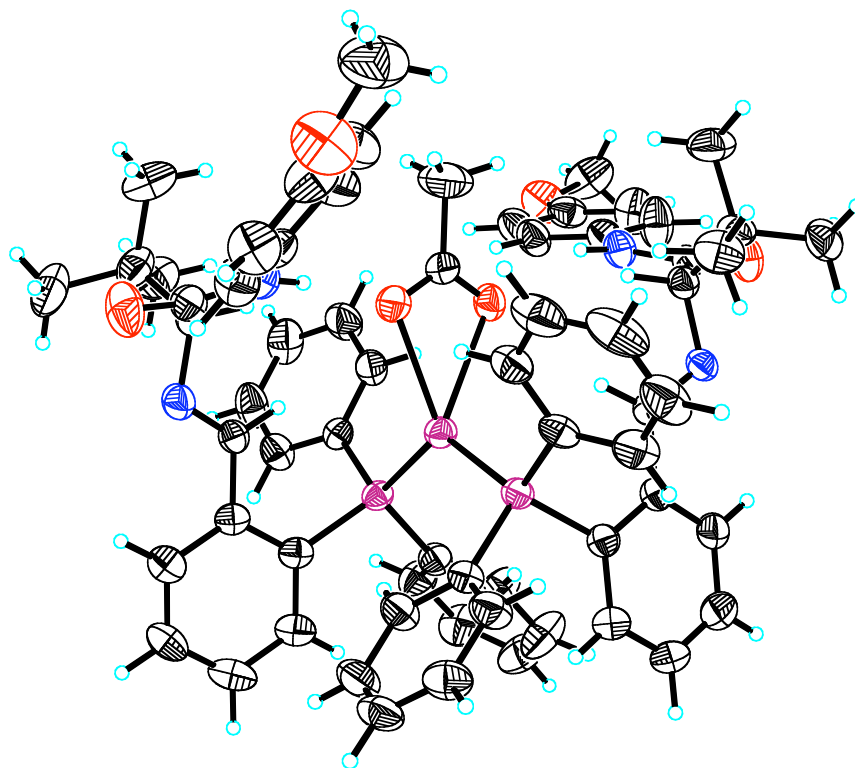

**Table 1.** Crystal data and structure refinement for AgOAc-1 complex **12**

|                        |                                                                                 |          |
|------------------------|---------------------------------------------------------------------------------|----------|
| Identification code    | bc106                                                                           |          |
| Empirical formula      | C <sub>70</sub> H <sub>79</sub> Ag N <sub>4</sub> O <sub>7</sub> P <sub>2</sub> |          |
| Formula weight         | 1258.18                                                                         |          |
| Temperature            | 193(2) K                                                                        |          |
| Wavelength             | 0.71073 Å                                                                       |          |
| Crystal system         | Orthorhombic                                                                    |          |
| Space group            | P2(1)2(1)2(1)                                                                   |          |
| Unit cell dimensions   | a = 17.451(4) Å                                                                 | α = 90°. |
|                        | b = 17.675(5) Å                                                                 | β = 90°. |
|                        | c = 21.505(6) Å                                                                 | γ = 90°. |
| Volume                 | 6633(3) Å <sup>3</sup>                                                          |          |
| Z                      | 4                                                                               |          |
| Density (calculated)   | 1.260 Mg/m <sup>3</sup>                                                         |          |
| Absorption coefficient | 0.406 mm <sup>-1</sup>                                                          |          |

|                                   |                                             |
|-----------------------------------|---------------------------------------------|
| F(000)                            | 2640                                        |
| Crystal size                      | 0.12 x 0.10 x 0.10 mm <sup>3</sup>          |
| Theta range for data collection   | 1.49 to 25.00°.                             |
| Index ranges                      | -14<=h<=20, -18<=k<=21, -25<=l<=25          |
| Reflections collected             | 42921                                       |
| Independent reflections           | 11670 [R(int) = 0.0218]                     |
| Completeness to theta = 25.00°    | 100.0 %                                     |
| Absorption correction             | Empirical                                   |
| Max. and min. transmission        | 0.9605 and 0.9528                           |
| Refinement method                 | Full-matrix least-squares on F <sup>2</sup> |
| Data / restraints / parameters    | 11670 / 2 / 740                             |
| Goodness-of-fit on F <sup>2</sup> | 1.029                                       |
| Final R indices [I>2sigma(I)]     | R1 = 0.0316, wR2 = 0.0861                   |
| R indices (all data)              | R1 = 0.0352, wR2 = 0.0895                   |
| Absolute structure parameter      | -0.024(14)                                  |
| Largest diff. peak and hole       | 0.936 and -0.350 e.Å <sup>-3</sup>          |

**Table 2.** Atomic coordinates ( $\times 10^4$ ) and equivalent isotropic displacement parameters ( $\text{\AA}^2 \times 10^3$ ). U(eq) is defined as one third of the trace of the orthogonalized  $U^{ij}$  tensor

|       | x        | y       | z       | U(eq) |
|-------|----------|---------|---------|-------|
| Ag(1) | 2286(1)  | 3664(1) | 502(1)  | 32(1) |
| P(1)  | 1851(1)  | 2422(1) | 838(1)  | 30(1) |
| P(2)  | 2558(1)  | 4084(1) | -551(1) | 30(1) |
| O(1)  | 1963(1)  | 4614(1) | 1264(1) | 41(1) |
| O(2)  | 3193(1)  | 4342(1) | 1256(1) | 39(1) |
| O(3)  | 5525(1)  | 3198(1) | 2099(1) | 49(1) |
| O(4)  | 6799(2)  | 6206(2) | 619(1)  | 66(1) |
| O(5)  | -586(1)  | 5670(2) | 933(1)  | 60(1) |
| O(6)  | -1202(2) | 4128(2) | 3532(2) | 80(1) |
| N(1)  | 4078(1)  | 2416(1) | 1734(1) | 33(1) |
| N(2)  | 4783(2)  | 4140(1) | 1702(1) | 39(1) |
| N(3)  | 574(1)   | 5452(2) | -70(1)  | 41(1) |
| N(4)  | 393(1)   | 5097(2) | 1447(1) | 40(1) |
| C(1)  | 2630(2)  | 4683(2) | 1479(1) | 37(1) |
| C(2)  | 2762(3)  | 5181(3) | 2039(2) | 86(2) |
| C(3)  | 2605(2)  | 1741(2) | 655(1)  | 35(1) |
| C(4)  | 3338(2)  | 1822(2) | 921(1)  | 34(1) |
| C(5)  | 3934(2)  | 1351(2) | 725(1)  | 43(1) |
| C(6)  | 3812(2)  | 810(2)  | 270(2)  | 58(1) |
| C(7)  | 3098(2)  | 724(2)  | 17(2)   | 57(1) |
| C(8)  | 2495(2)  | 1187(2) | 202(2)  | 47(1) |
| C(9)  | 3489(2)  | 2412(2) | 1387(1) | 31(1) |
| C(10) | 4143(2)  | 3060(2) | 2154(1) | 33(1) |
| C(11) | 4899(2)  | 3467(2) | 1991(1) | 35(1) |
| C(12) | 4086(2)  | 2829(2) | 2846(1) | 39(1) |
| C(13) | 3281(2)  | 2521(2) | 2948(2) | 55(1) |
| C(14) | 4667(2)  | 2243(2) | 3041(2) | 52(1) |
| C(15) | 4188(2)  | 3557(2) | 3228(2) | 59(1) |
| C(16) | 5341(2)  | 4630(2) | 1444(1) | 40(1) |
| C(17) | 5081(2)  | 5220(2) | 1083(2) | 46(1) |
| C(18) | 5581(2)  | 5726(2) | 813(2)  | 52(1) |

|       |          |         |          |       |
|-------|----------|---------|----------|-------|
| C(19) | 6355(2)  | 5658(2) | 909(2)   | 47(1) |
| C(20) | 6624(2)  | 5082(2) | 1251(2)  | 63(1) |
| C(21) | 6127(2)  | 4556(2) | 1527(2)  | 64(1) |
| C(22) | 7586(2)  | 6248(2) | 773(2)   | 70(1) |
| C(23) | 1603(2)  | 2256(2) | 1649(1)  | 36(1) |
| C(24) | 1721(2)  | 1563(2) | 1931(2)  | 49(1) |
| C(25) | 1472(2)  | 1456(2) | 2542(2)  | 62(1) |
| C(26) | 1120(2)  | 2025(3) | 2858(2)  | 64(1) |
| C(27) | 1000(2)  | 2714(3) | 2579(2)  | 61(1) |
| C(28) | 1254(2)  | 2836(2) | 1977(2)  | 44(1) |
| C(29) | 1020(2)  | 2075(2) | 420(1)   | 35(1) |
| C(30) | 842(2)   | 2404(2) | -152(1)  | 43(1) |
| C(31) | 230(2)   | 2143(2) | -497(2)  | 53(1) |
| C(32) | -218(2)  | 1565(2) | -273(2)  | 49(1) |
| C(33) | -47(2)   | 1236(2) | 284(2)   | 49(1) |
| C(34) | 564(2)   | 1486(2) | 638(2)   | 44(1) |
| C(35) | 1692(2)  | 4137(2) | -1031(1) | 32(1) |
| C(36) | 1083(2)  | 4614(2) | -856(1)  | 31(1) |
| C(37) | 441(2)   | 4671(2) | -1243(1) | 40(1) |
| C(38) | 390(2)   | 4236(2) | -1773(2) | 46(1) |
| C(39) | 964(2)   | 3732(2) | -1922(2) | 50(1) |
| C(40) | 1619(2)  | 3691(2) | -1559(1) | 42(1) |
| C(41) | 1113(2)  | 5043(2) | -268(1)  | 31(1) |
| C(42) | 708(2)   | 5810(2) | 530(2)   | 39(1) |
| C(43) | 99(2)    | 5519(2) | 982(2)   | 41(1) |
| C(44) | 735(2)   | 6683(2) | 478(2)   | 50(1) |
| C(45) | 818(3)   | 7007(2) | 1131(2)  | 70(1) |
| C(46) | 37(3)    | 6998(2) | 144(2)   | 73(1) |
| C(47) | 1459(2)  | 6893(2) | 110(2)   | 61(1) |
| C(48) | -9(2)    | 4836(2) | 1977(2)  | 41(1) |
| C(49) | 355(2)   | 4830(2) | 2539(2)  | 56(1) |
| C(50) | -15(3)   | 4601(2) | 3080(2)  | 63(1) |
| C(51) | -770(2)  | 4362(2) | 3040(2)  | 57(1) |
| C(52) | -1130(2) | 4344(2) | 2470(2)  | 61(1) |
| C(53) | -764(2)  | 4585(2) | 1945(2)  | 54(1) |
| C(54) | -902(4)  | 4230(3) | 4120(2)  | 87(2) |

|       |          |         |          |        |
|-------|----------|---------|----------|--------|
| C(55) | 3205(2)  | 3482(2) | -996(1)  | 39(1)  |
| C(56) | 3590(2)  | 3728(2) | -1516(2) | 50(1)  |
| C(57) | 4075(2)  | 3246(2) | -1839(2) | 62(1)  |
| C(58) | 4165(3)  | 2522(2) | -1649(2) | 68(1)  |
| C(59) | 3800(3)  | 2269(2) | -1129(2) | 71(1)  |
| C(60) | 3310(2)  | 2742(2) | -800(2)  | 54(1)  |
| C(61) | 2956(2)  | 5042(2) | -623(1)  | 31(1)  |
| C(62) | 2806(2)  | 5503(2) | -1125(2) | 43(1)  |
| C(63) | 3113(2)  | 6221(2) | -1153(2) | 55(1)  |
| C(64) | 3570(2)  | 6478(2) | -673(2)  | 59(1)  |
| C(65) | 3718(2)  | 6031(2) | -172(2)  | 53(1)  |
| C(66) | 3411(2)  | 5306(2) | -146(2)  | 40(1)  |
| O(1S) | 6925(8)  | 3438(7) | 3279(7)  | 314(6) |
| C(1S) | 6727(6)  | 4760(5) | 3235(4)  | 159(3) |
| C(2S) | 6705(7)  | 4140(6) | 3731(5)  | 198(5) |
| C(3S) | 6820(9)  | 2876(8) | 3890(6)  | 245(6) |
| C(4S) | 6947(10) | 2135(9) | 3497(8)  | 299(8) |

---

**Table 3.** Bond lengths [ $\text{\AA}$ ] and angles [ $^\circ$ ]

|              |           |              |           |
|--------------|-----------|--------------|-----------|
| Ag(1)-O(1)   | 2.413(2)  | Ag(1)-P(2)   | 2.4306(9) |
| Ag(1)-P(1)   | 2.4328(9) | Ag(1)-O(2)   | 2.562(2)  |
| P(1)-C(29)   | 1.813(3)  | P(1)-C(23)   | 1.820(3)  |
| P(1)-C(3)    | 1.826(3)  | P(2)-C(55)   | 1.824(3)  |
| P(2)-C(35)   | 1.831(3)  | P(2)-C(61)   | 1.836(3)  |
| O(1)-C(1)    | 1.257(4)  | O(2)-C(1)    | 1.248(4)  |
| O(3)-C(11)   | 1.213(4)  | O(4)-C(19)   | 1.389(4)  |
| O(4)-C(22)   | 1.413(5)  | O(5)-C(43)   | 1.229(4)  |
| O(6)-C(51)   | 1.362(5)  | O(6)-C(54)   | 1.381(6)  |
| N(1)-C(9)    | 1.271(4)  | N(1)-C(10)   | 1.457(4)  |
| N(2)-C(11)   | 1.358(4)  | N(2)-C(16)   | 1.416(4)  |
| N(2)-H(2)    | 0.8800    | N(3)-C(41)   | 1.260(4)  |
| N(3)-C(42)   | 1.456(4)  | N(4)-C(43)   | 1.349(4)  |
| N(4)-C(48)   | 1.416(4)  | N(4)-H(4)    | 0.8800    |
| C(1)-C(2)    | 1.510(5)  | C(2)-H(2A)   | 0.9800    |
| C(2)-H(2B)   | 0.9800    | C(2)-H(2C)   | 0.9800    |
| C(3)-C(8)    | 1.396(4)  | C(3)-C(4)    | 1.408(4)  |
| C(4)-C(5)    | 1.397(4)  | C(4)-C(9)    | 1.470(4)  |
| C(5)-C(6)    | 1.384(5)  | C(5)-H(5)    | 0.9500    |
| C(6)-C(7)    | 1.368(6)  | C(6)-H(6)    | 0.9500    |
| C(7)-C(8)    | 1.391(5)  | C(7)-H(7)    | 0.9500    |
| C(8)-H(8)    | 0.9500    | C(9)-H(9)    | 0.9500    |
| C(10)-C(11)  | 1.543(4)  | C(10)-C(12)  | 1.546(4)  |
| C(10)-H(10)  | 1.0000    | C(12)-C(14)  | 1.509(5)  |
| C(12)-C(13)  | 1.521(5)  | C(12)-C(15)  | 1.537(5)  |
| C(13)-H(13A) | 0.9800    | C(13)-H(13B) | 0.9800    |
| C(13)-H(13C) | 0.9800    | C(14)-H(14A) | 0.9800    |
| C(14)-H(14B) | 0.9800    | C(14)-H(14C) | 0.9800    |
| C(15)-H(15A) | 0.9800    | C(15)-H(15B) | 0.9800    |
| C(15)-H(15C) | 0.9800    | C(16)-C(17)  | 1.377(5)  |
| C(16)-C(21)  | 1.389(5)  | C(17)-C(18)  | 1.377(5)  |
| C(17)-H(17)  | 0.9500    | C(18)-C(19)  | 1.372(5)  |
| C(18)-H(18)  | 0.9500    | C(19)-C(20)  | 1.340(5)  |
| C(20)-C(21)  | 1.403(5)  | C(20)-H(20)  | 0.9500    |



|              |          |              |          |
|--------------|----------|--------------|----------|
| C(21)-H(21)  | 0.9500   | C(22)-H(22A) | 0.9800   |
| C(22)-H(22B) | 0.9800   | C(22)-H(22C) | 0.9800   |
| C(23)-C(24)  | 1.382(5) | C(23)-C(28)  | 1.385(5) |
| C(24)-C(25)  | 1.396(5) | C(24)-H(24)  | 0.9500   |
| C(25)-C(26)  | 1.361(6) | C(25)-H(25)  | 0.9500   |
| C(26)-C(27)  | 1.373(6) | C(26)-H(26)  | 0.9500   |
| C(27)-C(28)  | 1.387(5) | C(27)-H(27)  | 0.9500   |
| C(28)-H(28)  | 0.9500   | C(29)-C(34)  | 1.391(4) |
| C(29)-C(30)  | 1.395(4) | C(30)-C(31)  | 1.381(5) |
| C(30)-H(30)  | 0.9500   | C(31)-C(32)  | 1.375(5) |
| C(31)-H(31)  | 0.9500   | C(32)-C(33)  | 1.363(5) |
| C(32)-H(32)  | 0.9500   | C(33)-C(34)  | 1.383(5) |
| C(33)-H(33)  | 0.9500   | C(34)-H(34)  | 0.9500   |
| C(35)-C(40)  | 1.388(4) | C(35)-C(36)  | 1.409(4) |
| C(36)-C(37)  | 1.398(4) | C(36)-C(41)  | 1.475(4) |
| C(37)-C(38)  | 1.378(5) | C(37)-H(37)  | 0.9500   |
| C(38)-C(39)  | 1.378(5) | C(38)-H(38)  | 0.9500   |
| C(39)-C(40)  | 1.386(5) | C(39)-H(39)  | 0.9500   |
| C(40)-H(40)  | 0.9500   | C(41)-H(41)  | 0.9500   |
| C(42)-C(43)  | 1.530(5) | C(42)-C(44)  | 1.548(4) |
| C(42)-H(42)  | 1.0000   | C(44)-C(45)  | 1.525(5) |
| C(44)-C(46)  | 1.519(6) | C(44)-C(47)  | 1.536(5) |
| C(45)-H(45A) | 0.9800   | C(45)-H(45B) | 0.9800   |
| C(45)-H(45C) | 0.9800   | C(46)-H(46A) | 0.9800   |
| C(46)-H(46B) | 0.9800   | C(46)-H(46C) | 0.9800   |
| C(47)-H(47A) | 0.9800   | C(47)-H(47B) | 0.9800   |
| C(47)-H(47C) | 0.9800   | C(48)-C(49)  | 1.366(5) |
| C(48)-C(53)  | 1.392(5) | C(49)-C(50)  | 1.390(5) |
| C(49)-H(49)  | 0.9500   | C(50)-C(51)  | 1.387(6) |
| C(50)-H(50)  | 0.9500   | C(51)-C(52)  | 1.378(6) |
| C(52)-C(53)  | 1.365(5) | C(52)-H(52)  | 0.9500   |
| C(53)-H(53)  | 0.9500   | C(54)-H(54A) | 0.9800   |
| C(54)-H(54B) | 0.9800   | C(54)-H(54C) | 0.9800   |
| C(55)-C(56)  | 1.374(5) | C(55)-C(60)  | 1.387(5) |
| C(56)-C(57)  | 1.388(5) | C(56)-H(56)  | 0.9500   |
| C(57)-C(58)  | 1.351(6) | C(57)-H(57)  | 0.9500   |

|                  |            |                  |            |
|------------------|------------|------------------|------------|
| C(58)-C(59)      | 1.363(6)   | C(58)-H(58)      | 0.9500     |
| C(59)-C(60)      | 1.390(5)   | C(59)-H(59)      | 0.9500     |
| C(60)-H(60)      | 0.9500     | C(61)-C(62)      | 1.378(4)   |
| C(61)-C(66)      | 1.380(4)   | C(62)-C(63)      | 1.378(5)   |
| C(62)-H(62)      | 0.9500     | C(63)-C(64)      | 1.382(5)   |
| C(63)-H(63)      | 0.9500     | C(64)-C(65)      | 1.362(5)   |
| C(64)-H(64)      | 0.9500     | C(65)-C(66)      | 1.390(5)   |
| C(65)-H(65)      | 0.9500     | C(66)-H(66)      | 0.9500     |
| O(1S)-C(2S)      | 1.622(13)  | O(1S)-C(3S)      | 1.657(14)  |
| C(1S)-C(2S)      | 1.530(11)  | C(1S)-H(1S1)     | 0.9800     |
| C(1S)-H(1S2)     | 0.9800     | C(1S)-H(1S3)     | 0.9800     |
| C(2S)-H(2S1)     | 0.9900     | C(2S)-H(2S2)     | 0.9900     |
| C(3S)-C(4S)      | 1.574(14)  | C(3S)-H(3S1)     | 0.9900     |
| C(3S)-H(3S2)     | 0.9900     | C(4S)-H(4S1)     | 0.9800     |
| C(4S)-H(4S2)     | 0.9800     | C(4S)-H(4S3)     | 0.9800     |
| O(1)-Ag(1)-P(2)  | 117.79(6)  | O(1)-Ag(1)-P(1)  | 110.69(6)  |
| P(2)-Ag(1)-P(1)  | 127.81(2)  | O(1)-Ag(1)-O(2)  | 52.37(7)   |
| P(2)-Ag(1)-O(2)  | 109.06(5)  | P(1)-Ag(1)-O(2)  | 115.26(5)  |
| C(29)-P(1)-C(23) | 103.34(13) | C(29)-P(1)-C(3)  | 104.21(13) |
| C(23)-P(1)-C(3)  | 105.75(13) | C(29)-P(1)-Ag(1) | 114.08(10) |
| C(23)-P(1)-Ag(1) | 120.28(10) | C(3)-P(1)-Ag(1)  | 107.81(10) |
| C(55)-P(2)-C(35) | 104.18(13) | C(55)-P(2)-C(61) | 105.01(13) |
| C(35)-P(2)-C(61) | 102.55(12) | C(55)-P(2)-Ag(1) | 115.58(10) |
| C(35)-P(2)-Ag(1) | 112.35(9)  | C(61)-P(2)-Ag(1) | 115.72(9)  |
| C(1)-O(1)-Ag(1)  | 95.73(17)  | C(1)-O(2)-Ag(1)  | 88.98(17)  |
| C(19)-O(4)-C(22) | 118.3(3)   | C(51)-O(6)-C(54) | 117.6(4)   |
| C(9)-N(1)-C(10)  | 115.6(2)   | C(11)-N(2)-C(16) | 127.8(3)   |
| C(11)-N(2)-H(2)  | 116.1      | C(16)-N(2)-H(2)  | 116.1      |
| C(41)-N(3)-C(42) | 115.3(2)   | C(43)-N(4)-C(48) | 126.0(3)   |
| C(43)-N(4)-H(4)  | 117.0      | C(48)-N(4)-H(4)  | 117.0      |
| O(2)-C(1)-O(1)   | 122.8(3)   | O(2)-C(1)-C(2)   | 117.9(3)   |
| O(1)-C(1)-C(2)   | 119.3(3)   | C(1)-C(2)-H(2A)  | 109.1      |
| C(1)-C(2)-H(2B)  | 110.7      | H(2A)-C(2)-H(2B) | 109.5      |
| C(1)-C(2)-H(2C)  | 108.6      | H(2A)-C(2)-H(2C) | 109.5      |
| H(2B)-C(2)-H(2C) | 109.5      | C(8)-C(3)-C(4)   | 118.6(3)   |

|                     |          |                     |          |
|---------------------|----------|---------------------|----------|
| C(8)-C(3)-P(1)      | 121.0(2) | C(4)-C(3)-P(1)      | 120.0(2) |
| C(5)-C(4)-C(3)      | 119.6(3) | C(5)-C(4)-C(9)      | 119.6(3) |
| C(3)-C(4)-C(9)      | 120.8(3) | C(6)-C(5)-C(4)      | 120.6(3) |
| C(6)-C(5)-H(5)      | 119.7    | C(4)-C(5)-H(5)      | 119.7    |
| C(7)-C(6)-C(5)      | 119.9(3) | C(7)-C(6)-H(6)      | 120.0    |
| C(5)-C(6)-H(6)      | 120.0    | C(6)-C(7)-C(8)      | 120.6(3) |
| C(6)-C(7)-H(7)      | 119.7    | C(8)-C(7)-H(7)      | 119.7    |
| C(7)-C(8)-C(3)      | 120.6(3) | C(7)-C(8)-H(8)      | 119.7    |
| C(3)-C(8)-H(8)      | 119.7    | N(1)-C(9)-C(4)      | 123.4(3) |
| N(1)-C(9)-H(9)      | 118.3    | C(4)-C(9)-H(9)      | 118.3    |
| N(1)-C(10)-C(11)    | 106.8(2) | N(1)-C(10)-C(12)    | 112.6(2) |
| C(11)-C(10)-C(12)   | 113.4(2) | N(1)-C(10)-H(10)    | 107.9    |
| C(11)-C(10)-H(10)   | 107.9    | C(12)-C(10)-H(10)   | 107.9    |
| O(3)-C(11)-N(2)     | 124.4(3) | O(3)-C(11)-C(10)    | 123.0(3) |
| N(2)-C(11)-C(10)    | 112.6(2) | C(14)-C(12)-C(13)   | 109.6(3) |
| C(14)-C(12)-C(15)   | 110.3(3) | C(13)-C(12)-C(15)   | 109.2(3) |
| C(14)-C(12)-C(10)   | 113.9(3) | C(13)-C(12)-C(10)   | 107.0(3) |
| C(15)-C(12)-C(10)   | 106.6(3) | C(12)-C(13)-H(13A)  | 109.5    |
| C(12)-C(13)-H(13B)  | 109.5    | H(13A)-C(13)-H(13B) | 109.5    |
| C(12)-C(13)-H(13C)  | 109.5    | H(13A)-C(13)-H(13C) | 109.5    |
| H(13B)-C(13)-H(13C) | 109.5    | C(12)-C(14)-H(14A)  | 109.5    |
| C(12)-C(14)-H(14B)  | 109.5    | H(14A)-C(14)-H(14B) | 109.5    |
| C(12)-C(14)-H(14C)  | 109.5    | H(14A)-C(14)-H(14C) | 109.5    |
| H(14B)-C(14)-H(14C) | 109.5    | C(12)-C(15)-H(15A)  | 109.5    |
| C(12)-C(15)-H(15B)  | 109.5    | H(15A)-C(15)-H(15B) | 109.5    |
| C(12)-C(15)-H(15C)  | 109.5    | H(15A)-C(15)-H(15C) | 109.5    |
| H(15B)-C(15)-H(15C) | 109.5    | C(17)-C(16)-C(21)   | 117.9(3) |
| C(17)-C(16)-N(2)    | 117.2(3) | C(21)-C(16)-N(2)    | 124.8(3) |
| C(16)-C(17)-C(18)   | 121.4(3) | C(16)-C(17)-H(17)   | 119.3    |
| C(18)-C(17)-H(17)   | 119.3    | C(19)-C(18)-C(17)   | 120.2(3) |
| C(19)-C(18)-H(18)   | 119.9    | C(17)-C(18)-H(18)   | 119.9    |
| C(20)-C(19)-C(18)   | 119.6(3) | C(20)-C(19)-O(4)    | 125.4(3) |
| C(18)-C(19)-O(4)    | 114.9(3) | C(19)-C(20)-C(21)   | 121.2(4) |
| C(19)-C(20)-H(20)   | 119.4    | C(21)-C(20)-H(20)   | 119.4    |
| C(16)-C(21)-C(20)   | 119.6(3) | C(16)-C(21)-H(21)   | 120.2    |
| C(20)-C(21)-H(21)   | 120.2    | O(4)-C(22)-H(22A)   | 109.5    |

|                     |          |                     |          |
|---------------------|----------|---------------------|----------|
| O(4)-C(22)-H(22B)   | 109.5    | H(22A)-C(22)-H(22B) | 109.5    |
| O(4)-C(22)-H(22C)   | 109.5    | H(22A)-C(22)-H(22C) | 109.5    |
| H(22B)-C(22)-H(22C) | 109.5    | C(24)-C(23)-C(28)   | 119.8(3) |
| C(24)-C(23)-P(1)    | 121.9(2) | C(28)-C(23)-P(1)    | 118.2(2) |
| C(23)-C(24)-C(25)   | 119.2(4) | C(23)-C(24)-H(24)   | 120.4    |
| C(25)-C(24)-H(24)   | 120.4    | C(26)-C(25)-C(24)   | 120.6(4) |
| C(26)-C(25)-H(25)   | 119.7    | C(24)-C(25)-H(25)   | 119.7    |
| C(25)-C(26)-C(27)   | 120.5(3) | C(25)-C(26)-H(26)   | 119.8    |
| C(27)-C(26)-H(26)   | 119.8    | C(26)-C(27)-C(28)   | 119.8(4) |
| C(26)-C(27)-H(27)   | 120.1    | C(28)-C(27)-H(27)   | 120.1    |
| C(23)-C(28)-C(27)   | 120.1(3) | C(23)-C(28)-H(28)   | 120.0    |
| C(27)-C(28)-H(28)   | 120.0    | C(34)-C(29)-C(30)   | 118.8(3) |
| C(34)-C(29)-P(1)    | 122.9(2) | C(30)-C(29)-P(1)    | 118.3(2) |
| C(31)-C(30)-C(29)   | 120.5(3) | C(31)-C(30)-H(30)   | 119.8    |
| C(29)-C(30)-H(30)   | 119.8    | C(32)-C(31)-C(30)   | 119.9(3) |
| C(32)-C(31)-H(31)   | 120.0    | C(30)-C(31)-H(31)   | 120.0    |
| C(33)-C(32)-C(31)   | 120.1(3) | C(33)-C(32)-H(32)   | 120.0    |
| C(31)-C(32)-H(32)   | 120.0    | C(32)-C(33)-C(34)   | 121.0(3) |
| C(32)-C(33)-H(33)   | 119.5    | C(34)-C(33)-H(33)   | 119.5    |
| C(33)-C(34)-C(29)   | 119.7(3) | C(33)-C(34)-H(34)   | 120.2    |
| C(29)-C(34)-H(34)   | 120.2    | C(40)-C(35)-C(36)   | 119.3(3) |
| C(40)-C(35)-P(2)    | 120.5(2) | C(36)-C(35)-P(2)    | 120.2(2) |
| C(37)-C(36)-C(35)   | 119.2(3) | C(37)-C(36)-C(41)   | 120.1(3) |
| C(35)-C(36)-C(41)   | 120.6(3) | C(38)-C(37)-C(36)   | 120.3(3) |
| C(38)-C(37)-H(37)   | 119.9    | C(36)-C(37)-H(37)   | 119.9    |
| C(39)-C(38)-C(37)   | 120.4(3) | C(39)-C(38)-H(38)   | 119.8    |
| C(37)-C(38)-H(38)   | 119.8    | C(38)-C(39)-C(40)   | 120.2(3) |
| C(38)-C(39)-H(39)   | 119.9    | C(40)-C(39)-H(39)   | 119.9    |
| C(35)-C(40)-C(39)   | 120.4(3) | C(35)-C(40)-H(40)   | 119.8    |
| C(39)-C(40)-H(40)   | 119.8    | N(3)-C(41)-C(36)    | 123.8(3) |
| N(3)-C(41)-H(41)    | 118.1    | C(36)-C(41)-H(41)   | 118.1    |
| N(3)-C(42)-C(43)    | 107.8(2) | N(3)-C(42)-C(44)    | 112.0(3) |
| C(43)-C(42)-C(44)   | 113.6(3) | N(3)-C(42)-H(42)    | 107.7    |
| C(43)-C(42)-H(42)   | 107.7    | C(44)-C(42)-H(42)   | 107.7    |
| O(5)-C(43)-N(4)     | 123.6(3) | O(5)-C(43)-C(42)    | 123.2(3) |
| N(4)-C(43)-C(42)    | 113.1(3) | C(45)-C(44)-C(46)   | 111.9(3) |

|                     |          |                     |          |
|---------------------|----------|---------------------|----------|
| C(45)-C(44)-C(47)   | 107.7(3) | C(46)-C(44)-C(47)   | 109.2(3) |
| C(45)-C(44)-C(42)   | 108.1(3) | C(46)-C(44)-C(42)   | 112.1(3) |
| C(47)-C(44)-C(42)   | 107.7(3) | C(44)-C(45)-H(45A)  | 109.5    |
| C(44)-C(45)-H(45B)  | 109.5    | H(45A)-C(45)-H(45B) | 109.5    |
| C(44)-C(45)-H(45C)  | 109.5    | H(45A)-C(45)-H(45C) | 109.5    |
| H(45B)-C(45)-H(45C) | 109.5    | C(44)-C(46)-H(46A)  | 109.5    |
| C(44)-C(46)-H(46B)  | 109.5    | H(46A)-C(46)-H(46B) | 109.5    |
| C(44)-C(46)-H(46C)  | 109.5    | H(46A)-C(46)-H(46C) | 109.5    |
| H(46B)-C(46)-H(46C) | 109.5    | C(44)-C(47)-H(47A)  | 109.5    |
| C(44)-C(47)-H(47B)  | 109.5    | H(47A)-C(47)-H(47B) | 109.5    |
| C(44)-C(47)-H(47C)  | 109.5    | H(47A)-C(47)-H(47C) | 109.5    |
| H(47B)-C(47)-H(47C) | 109.5    | C(49)-C(48)-C(53)   | 118.8(3) |
| C(49)-C(48)-N(4)    | 119.0(3) | C(53)-C(48)-N(4)    | 122.2(3) |
| C(48)-C(49)-C(50)   | 121.8(4) | C(48)-C(49)-H(49)   | 119.1    |
| C(50)-C(49)-H(49)   | 119.1    | C(51)-C(50)-C(49)   | 118.6(4) |
| C(51)-C(50)-H(50)   | 120.7    | C(49)-C(50)-H(50)   | 120.7    |
| O(6)-C(51)-C(52)    | 115.6(4) | O(6)-C(51)-C(50)    | 124.7(4) |
| C(52)-C(51)-C(50)   | 119.7(4) | C(53)-C(52)-C(51)   | 121.0(4) |
| C(53)-C(52)-H(52)   | 119.5    | C(51)-C(52)-H(52)   | 119.5    |
| C(52)-C(53)-C(48)   | 120.2(4) | C(52)-C(53)-H(53)   | 119.9    |
| C(48)-C(53)-H(53)   | 119.9    | O(6)-C(54)-H(54A)   | 109.5    |
| O(6)-C(54)-H(54B)   | 109.5    | H(54A)-C(54)-H(54B) | 109.5    |
| O(6)-C(54)-H(54C)   | 109.5    | H(54A)-C(54)-H(54C) | 109.5    |
| H(54B)-C(54)-H(54C) | 109.5    | C(56)-C(55)-C(60)   | 118.8(3) |
| C(56)-C(55)-P(2)    | 123.0(2) | C(60)-C(55)-P(2)    | 118.2(2) |
| C(55)-C(56)-C(57)   | 120.7(4) | C(55)-C(56)-H(56)   | 119.7    |
| C(57)-C(56)-H(56)   | 119.7    | C(58)-C(57)-C(56)   | 120.0(4) |
| C(58)-C(57)-H(57)   | 120.0    | C(56)-C(57)-H(57)   | 120.0    |
| C(57)-C(58)-C(59)   | 120.4(4) | C(57)-C(58)-H(58)   | 119.8    |
| C(59)-C(58)-H(58)   | 119.8    | C(58)-C(59)-C(60)   | 120.5(4) |
| C(58)-C(59)-H(59)   | 119.8    | C(60)-C(59)-H(59)   | 119.8    |
| C(59)-C(60)-C(55)   | 119.6(3) | C(59)-C(60)-H(60)   | 120.2    |
| C(55)-C(60)-H(60)   | 120.2    | C(62)-C(61)-C(66)   | 119.4(3) |
| C(62)-C(61)-P(2)    | 122.7(2) | C(66)-C(61)-P(2)    | 117.8(2) |
| C(61)-C(62)-C(63)   | 120.4(3) | C(61)-C(62)-H(62)   | 119.8    |
| C(63)-C(62)-H(62)   | 119.8    | C(62)-C(63)-C(64)   | 119.7(3) |

|                     |          |                     |          |
|---------------------|----------|---------------------|----------|
| C(62)-C(63)-H(63)   | 120.2    | C(64)-C(63)-H(63)   | 120.2    |
| C(65)-C(64)-C(63)   | 120.6(3) | C(65)-C(64)-H(64)   | 119.7    |
| C(63)-C(64)-H(64)   | 119.7    | C(64)-C(65)-C(66)   | 119.6(3) |
| C(64)-C(65)-H(65)   | 120.2    | C(66)-C(65)-H(65)   | 120.2    |
| C(61)-C(66)-C(65)   | 120.3(3) | C(61)-C(66)-H(66)   | 119.9    |
| C(65)-C(66)-H(66)   | 119.9    | C(2S)-O(1S)-C(3S)   | 87.6(10) |
| C(2S)-C(1S)-H(1S1)  | 107.3    | C(2S)-C(1S)-H(1S2)  | 109.8    |
| H(1S1)-C(1S)-H(1S2) | 109.5    | C(2S)-C(1S)-H(1S3)  | 111.3    |
| H(1S1)-C(1S)-H(1S3) | 109.5    | H(1S2)-C(1S)-H(1S3) | 109.5    |
| C(1S)-C(2S)-O(1S)   | 97.1(9)  | C(1S)-C(2S)-H(2S1)  | 109.6    |
| O(1S)-C(2S)-H(2S1)  | 117.3    | C(1S)-C(2S)-H(2S2)  | 111.5    |
| O(1S)-C(2S)-H(2S2)  | 112.7    | H(2S1)-C(2S)-H(2S2) | 108.1    |
| C(4S)-C(3S)-O(1S)   | 93.3(11) | C(4S)-C(3S)-H(3S1)  | 111.3    |
| O(1S)-C(3S)-H(3S1)  | 112.9    | C(4S)-C(3S)-H(3S2)  | 113.1    |
| O(1S)-C(3S)-H(3S2)  | 116.1    | H(3S1)-C(3S)-H(3S2) | 109.3    |
| C(3S)-C(4S)-H(4S1)  | 107.8    | C(3S)-C(4S)-H(4S2)  | 109.5    |
| H(4S1)-C(4S)-H(4S2) | 109.5    | C(3S)-C(4S)-H(4S3)  | 111.1    |
| H(4S1)-C(4S)-H(4S3) | 109.5    | H(4S2)-C(4S)-H(4S3) | 109.5    |

---

Symmetry transformations used to generate equivalent atoms:

**Table 4.** Anisotropic displacement parameters ( $\text{\AA}^2 \times 10^3$ ) for bc106. The anisotropic displacement factor exponent takes the form:  $-2\pi^2 [ h^2 a^{*2} U^{11} + \dots + 2 h k a^* b^* U^{12} ]$

|       | U <sup>11</sup> | U <sup>22</sup> | U <sup>33</sup> | U <sup>23</sup> | U <sup>13</sup> | U <sup>12</sup> |
|-------|-----------------|-----------------|-----------------|-----------------|-----------------|-----------------|
| Ag(1) | 37(1)           | 29(1)           | 30(1)           | 0(1)            | 0(1)            | 0(1)            |
| P(1)  | 33(1)           | 30(1)           | 28(1)           | 0(1)            | -4(1)           | -2(1)           |
| P(2)  | 33(1)           | 29(1)           | 28(1)           | -1(1)           | 4(1)            | 0(1)            |
| O(1)  | 35(1)           | 44(1)           | 45(1)           | -6(1)           | -2(1)           | 7(1)            |
| O(2)  | 31(1)           | 44(1)           | 43(1)           | 1(1)            | -3(1)           | 6(1)            |
| O(3)  | 31(1)           | 57(1)           | 60(1)           | 14(1)           | -4(1)           | 2(1)            |
| O(4)  | 64(2)           | 70(2)           | 62(2)           | 12(1)           | 0(1)            | -26(1)          |
| O(5)  | 34(1)           | 87(2)           | 58(2)           | 11(1)           | 5(1)            | 16(1)           |
| O(6)  | 76(2)           | 94(2)           | 70(2)           | 13(2)           | 11(2)           | -18(2)          |
| N(1)  | 33(1)           | 40(1)           | 26(1)           | -1(1)           | -2(1)           | 5(1)            |
| N(2)  | 31(1)           | 44(1)           | 43(1)           | 4(1)            | -3(1)           | 0(1)            |
| N(3)  | 33(1)           | 51(2)           | 39(1)           | -5(1)           | -3(1)           | 8(1)            |
| N(4)  | 30(1)           | 47(1)           | 42(1)           | -4(1)           | 4(1)            | 6(1)            |
| C(1)  | 42(2)           | 35(1)           | 33(1)           | -3(1)           | -1(1)           | 3(1)            |
| C(2)  | 76(3)           | 109(4)          | 73(3)           | -49(3)          | -18(3)          | 14(3)           |
| C(3)  | 44(2)           | 31(1)           | 30(1)           | 2(1)            | -4(1)           | 1(1)            |
| C(4)  | 42(2)           | 33(1)           | 28(1)           | 3(1)            | -3(1)           | 1(1)            |
| C(5)  | 46(2)           | 45(2)           | 39(2)           | -3(1)           | -6(1)           | 13(2)           |
| C(6)  | 71(2)           | 52(2)           | 50(2)           | -12(2)          | -8(2)           | 23(2)           |
| C(7)  | 75(3)           | 46(2)           | 50(2)           | -20(2)          | -14(2)          | 16(2)           |
| C(8)  | 58(2)           | 39(2)           | 45(2)           | -10(1)          | -12(2)          | 4(1)            |
| C(9)  | 29(1)           | 35(1)           | 30(1)           | 0(1)            | 3(1)            | 3(1)            |
| C(10) | 29(1)           | 37(2)           | 33(1)           | -1(1)           | -3(1)           | 3(1)            |
| C(11) | 34(2)           | 39(2)           | 32(1)           | 1(1)            | -3(1)           | 1(1)            |
| C(12) | 41(2)           | 47(2)           | 29(1)           | -7(1)           | 2(1)            | 2(1)            |
| C(13) | 51(2)           | 69(2)           | 45(2)           | -3(2)           | 14(2)           | -7(2)           |
| C(14) | 64(2)           | 58(2)           | 32(2)           | 9(1)            | 1(2)            | 9(2)            |
| C(15) | 72(2)           | 62(2)           | 43(2)           | -19(2)          | 4(2)            | 3(2)            |
| C(16) | 37(2)           | 43(2)           | 39(2)           | 2(1)            | -2(1)           | -8(1)           |
| C(17) | 42(2)           | 47(2)           | 50(2)           | 5(2)            | -12(2)          | -7(2)           |
| C(18) | 59(2)           | 49(2)           | 48(2)           | 7(2)            | -11(2)          | -12(2)          |

|       |        |        |        |        |        |        |
|-------|--------|--------|--------|--------|--------|--------|
| C(19) | 56(2)  | 45(2)  | 42(2)  | -3(1)  | -2(2)  | -14(2) |
| C(20) | 38(2)  | 69(2)  | 81(3)  | 7(2)   | 5(2)   | -4(2)  |
| C(21) | 41(2)  | 63(2)  | 87(3)  | 26(2)  | -6(2)  | -1(2)  |
| C(22) | 53(2)  | 54(2)  | 104(3) | -12(2) | 22(2)  | -20(2) |
| C(23) | 34(2)  | 44(2)  | 30(1)  | -2(1)  | -3(1)  | -12(1) |
| C(24) | 62(2)  | 47(2)  | 38(2)  | 4(1)   | -2(2)  | -16(2) |
| C(25) | 77(3)  | 65(2)  | 44(2)  | 20(2)  | -12(2) | -27(2) |
| C(26) | 51(2)  | 110(4) | 33(2)  | 1(2)   | 5(2)   | -27(2) |
| C(27) | 47(2)  | 95(3)  | 39(2)  | -14(2) | 0(2)   | -4(2)  |
| C(28) | 39(2)  | 56(2)  | 38(2)  | -5(2)  | -5(1)  | -2(2)  |
| C(29) | 36(2)  | 36(1)  | 34(1)  | -4(1)  | -5(1)  | -1(1)  |
| C(30) | 43(2)  | 45(2)  | 40(2)  | 3(1)   | -8(1)  | -6(1)  |
| C(31) | 53(2)  | 65(2)  | 40(2)  | -6(2)  | -15(2) | -1(2)  |
| C(32) | 35(2)  | 63(2)  | 48(2)  | -17(2) | -9(1)  | -6(2)  |
| C(33) | 42(2)  | 52(2)  | 52(2)  | -8(2)  | 2(1)   | -14(2) |
| C(34) | 46(2)  | 45(2)  | 40(2)  | 0(1)   | -7(1)  | -11(1) |
| C(35) | 38(2)  | 29(1)  | 30(1)  | 2(1)   | 3(1)   | -8(1)  |
| C(36) | 32(1)  | 29(1)  | 33(1)  | 2(1)   | 4(1)   | -8(1)  |
| C(37) | 34(2)  | 45(2)  | 40(2)  | 4(1)   | 2(1)   | -9(1)  |
| C(38) | 37(2)  | 64(2)  | 38(2)  | 2(2)   | -6(1)  | -13(2) |
| C(39) | 51(2)  | 63(2)  | 36(2)  | -12(2) | 1(1)   | -20(2) |
| C(40) | 43(2)  | 46(2)  | 36(1)  | -7(1)  | 3(1)   | -8(2)  |
| C(41) | 27(1)  | 34(1)  | 33(1)  | 2(1)   | -1(1)  | -1(1)  |
| C(42) | 32(1)  | 48(2)  | 36(1)  | -5(1)  | 0(1)   | 10(1)  |
| C(43) | 34(2)  | 50(2)  | 40(2)  | -8(1)  | 1(1)   | 7(1)   |
| C(44) | 53(2)  | 44(2)  | 53(2)  | -4(2)  | 9(2)   | 13(1)  |
| C(45) | 84(3)  | 56(2)  | 69(3)  | -22(2) | 16(2)  | -1(2)  |
| C(46) | 74(3)  | 58(2)  | 88(3)  | 4(2)   | 5(2)   | 30(2)  |
| C(47) | 71(3)  | 52(2)  | 61(2)  | 0(2)   | 10(2)  | 1(2)   |
| C(48) | 38(2)  | 37(2)  | 48(2)  | -5(1)  | 7(1)   | 3(1)   |
| C(49) | 51(2)  | 68(2)  | 50(2)  | -2(2)  | 2(2)   | -17(2) |
| C(50) | 73(3)  | 71(3)  | 45(2)  | 4(2)   | -2(2)  | -10(2) |
| C(51) | 59(2)  | 48(2)  | 64(2)  | 0(2)   | 24(2)  | -4(2)  |
| C(52) | 54(2)  | 64(2)  | 65(2)  | 4(2)   | 5(2)   | -8(2)  |
| C(53) | 44(2)  | 52(2)  | 66(2)  | 2(2)   | 0(2)   | -4(2)  |
| C(54) | 131(5) | 75(3)  | 56(2)  | 0(2)   | 4(3)   | -16(3) |



|       |       |       |       |        |        |        |
|-------|-------|-------|-------|--------|--------|--------|
| C(55) | 37(2) | 44(2) | 34(1) | -5(1)  | 2(1)   | 5(1)   |
| C(56) | 54(2) | 49(2) | 47(2) | -2(2)  | 13(2)  | 6(2)   |
| C(57) | 54(2) | 76(3) | 55(2) | -9(2)  | 21(2)  | 6(2)   |
| C(58) | 64(3) | 59(2) | 80(3) | -22(2) | 22(2)  | 11(2)  |
| C(59) | 87(3) | 42(2) | 83(3) | -2(2)  | 25(2)  | 15(2)  |
| C(60) | 68(2) | 39(2) | 56(2) | -2(2)  | 21(2)  | 8(2)   |
| C(61) | 26(1) | 32(1) | 35(1) | 0(1)   | 4(1)   | 1(1)   |
| C(62) | 40(2) | 45(2) | 43(2) | 8(1)   | -5(1)  | -6(2)  |
| C(63) | 45(2) | 51(2) | 68(2) | 23(2)  | -10(2) | -7(2)  |
| C(64) | 46(2) | 40(2) | 92(3) | 14(2)  | -11(2) | -12(2) |
| C(65) | 49(2) | 48(2) | 62(2) | 0(2)   | -17(2) | -9(2)  |
| C(66) | 38(2) | 38(2) | 44(2) | 5(1)   | -5(1)  | -2(1)  |

---

**Table 5.** Hydrogen coordinates ( $\times 10^4$ ) and isotropic displacement parameters ( $\text{\AA}^2 \times 10^3$ )

|        | x    | y    | z    | U(eq) |
|--------|------|------|------|-------|
| H(2)   | 4304 | 4289 | 1671 | 47    |
| H(4)   | 880  | 4972 | 1418 | 48    |
| H(2A)  | 3229 | 5016 | 2252 | 128   |
| H(2B)  | 2327 | 5152 | 2326 | 128   |
| H(2C)  | 2826 | 5704 | 1896 | 128   |
| H(5)   | 4428 | 1401 | 906  | 52    |
| H(6)   | 4223 | 500  | 133  | 69    |
| H(7)   | 3013 | 344  | -288 | 68    |
| H(8)   | 2004 | 1125 | 17   | 57    |
| H(9)   | 3127 | 2810 | 1431 | 38    |
| H(10)  | 3711 | 3414 | 2062 | 40    |
| H(13A) | 3227 | 2036 | 2731 | 83    |
| H(13B) | 2905 | 2882 | 2784 | 83    |
| H(13C) | 3194 | 2447 | 3394 | 83    |
| H(14A) | 4583 | 2108 | 3478 | 77    |
| H(14B) | 5184 | 2450 | 2992 | 77    |
| H(14C) | 4611 | 1791 | 2781 | 77    |
| H(15A) | 3797 | 3926 | 3107 | 89    |
| H(15B) | 4698 | 3769 | 3150 | 89    |
| H(15C) | 4135 | 3440 | 3672 | 89    |
| H(17)  | 4546 | 5279 | 1019 | 55    |
| H(18)  | 5389 | 6123 | 559  | 63    |
| H(20)  | 7161 | 5030 | 1308 | 75    |
| H(21)  | 6326 | 4152 | 1768 | 77    |
| H(22A) | 7642 | 6299 | 1224 | 105   |
| H(22B) | 7815 | 6688 | 567  | 105   |
| H(22C) | 7845 | 5787 | 633  | 105   |
| H(24)  | 1967 | 1165 | 1712 | 59    |
| H(25)  | 1550 | 981  | 2739 | 75    |
| H(26)  | 957  | 1945 | 3274 | 77    |
| H(27)  | 742  | 3105 | 2799 | 73    |
| H(28)  | 1189 | 3318 | 1789 | 53    |

|        |       |      |       |     |
|--------|-------|------|-------|-----|
| H(30)  | 1145  | 2811 | -304  | 51  |
| H(31)  | 119   | 2363 | -890  | 63  |
| H(32)  | -647  | 1394 | -506  | 58  |
| H(33)  | -353  | 828  | 430   | 59  |
| H(34)  | 672   | 1257 | 1028  | 52  |
| H(37)  | 39    | 5011 | -1140 | 48  |
| H(38)  | -43   | 4284 | -2038 | 56  |
| H(39)  | 910   | 3411 | -2274 | 60  |
| H(40)  | 2021  | 3356 | -1673 | 50  |
| H(41)  | 1565  | 5008 | -24   | 38  |
| H(42)  | 1219  | 5635 | 684   | 46  |
| H(45A) | 910   | 7553 | 1105  | 105 |
| H(45B) | 1251  | 6763 | 1341  | 105 |
| H(45C) | 347   | 6912 | 1367  | 105 |
| H(46A) | 56    | 7552 | 151   | 110 |
| H(46B) | -429  | 6825 | 355   | 110 |
| H(46C) | 34    | 6820 | -287  | 110 |
| H(47A) | 1420  | 6693 | -313  | 92  |
| H(47B) | 1910  | 6675 | 316   | 92  |
| H(47C) | 1510  | 7445 | 95    | 92  |
| H(49)  | 875   | 4987 | 2562  | 68  |
| H(50)  | 244   | 4608 | 3469  | 76  |
| H(52)  | -1641 | 4161 | 2441  | 73  |
| H(53)  | -1024 | 4581 | 1558  | 65  |
| H(54A) | -486  | 3868 | 4189  | 131 |
| H(54B) | -1305 | 4149 | 4430  | 131 |
| H(54C) | -703  | 4747 | 4158  | 131 |
| H(56)  | 3523  | 4234 | -1655 | 60  |
| H(57)  | 4344  | 3424 | -2194 | 74  |
| H(58)  | 4483  | 2189 | -1880 | 81  |
| H(59)  | 3882  | 1765 | -990  | 85  |
| H(60)  | 3049  | 2559 | -442  | 65  |
| H(62)  | 2490  | 5326 | -1454 | 51  |
| H(63)  | 3010  | 6537 | -1501 | 65  |
| H(64)  | 3784  | 6972 | -694  | 71  |
| H(65)  | 4029  | 6213 | 158   | 64  |

|        |      |      |      |     |
|--------|------|------|------|-----|
| H(66)  | 3515 | 4991 | 202  | 48  |
| H(1S1) | 7058 | 5164 | 3392 | 239 |
| H(1S2) | 6209 | 4959 | 3167 | 239 |
| H(1S3) | 6932 | 4568 | 2842 | 239 |
| H(2S1) | 6193 | 4130 | 3930 | 237 |
| H(2S2) | 7092 | 4228 | 4060 | 237 |
| H(3S1) | 7229 | 2943 | 4204 | 294 |
| H(3S2) | 6315 | 2892 | 4098 | 294 |
| H(4S1) | 6491 | 1817 | 3545 | 449 |
| H(4S2) | 7397 | 1864 | 3654 | 449 |
| H(4S3) | 7022 | 2254 | 3056 | 449 |

---

**Table 6.** Torsion angles [°]

|                       |             |
|-----------------------|-------------|
| O(1)-Ag(1)-P(1)-C(29) | 106.45(12)  |
| P(2)-Ag(1)-P(1)-C(29) | -51.05(11)  |
| O(2)-Ag(1)-P(1)-C(29) | 163.53(11)  |
| O(1)-Ag(1)-P(1)-C(23) | -17.16(13)  |
| P(2)-Ag(1)-P(1)-C(23) | -174.67(12) |
| O(2)-Ag(1)-P(1)-C(23) | 39.92(13)   |
| O(1)-Ag(1)-P(1)-C(3)  | -138.34(10) |
| P(2)-Ag(1)-P(1)-C(3)  | 64.16(10)   |
| O(2)-Ag(1)-P(1)-C(3)  | -81.26(10)  |
| O(1)-Ag(1)-P(2)-C(55) | 152.20(12)  |
| P(1)-Ag(1)-P(2)-C(55) | -51.67(12)  |
| O(2)-Ag(1)-P(2)-C(55) | 95.44(12)   |
| O(1)-Ag(1)-P(2)-C(35) | -88.44(11)  |
| P(1)-Ag(1)-P(2)-C(35) | 67.70(10)   |
| O(2)-Ag(1)-P(2)-C(35) | -145.20(11) |
| O(1)-Ag(1)-P(2)-C(61) | 28.87(11)   |
| P(1)-Ag(1)-P(2)-C(61) | -174.99(9)  |
| O(2)-Ag(1)-P(2)-C(61) | -27.89(11)  |
| P(2)-Ag(1)-O(1)-C(1)  | -95.56(17)  |
| P(1)-Ag(1)-O(1)-C(1)  | 104.42(17)  |
| O(2)-Ag(1)-O(1)-C(1)  | -2.13(16)   |
| O(1)-Ag(1)-O(2)-C(1)  | 2.13(16)    |
| P(2)-Ag(1)-O(2)-C(1)  | 113.02(16)  |
| P(1)-Ag(1)-O(2)-C(1)  | -95.30(17)  |
| Ag(1)-O(2)-C(1)-O(1)  | -3.9(3)     |
| Ag(1)-O(2)-C(1)-C(2)  | 174.6(3)    |
| Ag(1)-O(1)-C(1)-O(2)  | 4.1(3)      |
| Ag(1)-O(1)-C(1)-C(2)  | -174.3(3)   |
| C(29)-P(1)-C(3)-C(8)  | 9.1(3)      |
| C(23)-P(1)-C(3)-C(8)  | 117.7(2)    |
| Ag(1)-P(1)-C(3)-C(8)  | -112.4(2)   |
| C(29)-P(1)-C(3)-C(4)  | -178.1(2)   |
| C(23)-P(1)-C(3)-C(4)  | -69.5(2)    |
| Ag(1)-P(1)-C(3)-C(4)  | 60.4(2)     |
| C(8)-C(3)-C(4)-C(5)   | 0.1(4)      |

|                         |           |
|-------------------------|-----------|
| P(1)-C(3)-C(4)-C(5)     | -172.8(2) |
| C(8)-C(3)-C(4)-C(9)     | 178.2(3)  |
| P(1)-C(3)-C(4)-C(9)     | 5.3(4)    |
| C(3)-C(4)-C(5)-C(6)     | 0.5(5)    |
| C(9)-C(4)-C(5)-C(6)     | -177.6(3) |
| C(4)-C(5)-C(6)-C(7)     | -1.4(6)   |
| C(5)-C(6)-C(7)-C(8)     | 1.6(6)    |
| C(6)-C(7)-C(8)-C(3)     | -1.0(6)   |
| C(4)-C(3)-C(8)-C(7)     | 0.1(5)    |
| P(1)-C(3)-C(8)-C(7)     | 172.9(3)  |
| C(10)-N(1)-C(9)-C(4)    | 178.0(2)  |
| C(5)-C(4)-C(9)-N(1)     | -17.1(4)  |
| C(3)-C(4)-C(9)-N(1)     | 164.8(3)  |
| C(9)-N(1)-C(10)-C(11)   | -120.4(3) |
| C(9)-N(1)-C(10)-C(12)   | 114.5(3)  |
| C(16)-N(2)-C(11)-O(3)   | 3.7(5)    |
| C(16)-N(2)-C(11)-C(10)  | -174.5(3) |
| N(1)-C(10)-C(11)-O(3)   | -70.0(4)  |
| C(12)-C(10)-C(11)-O(3)  | 54.7(4)   |
| N(1)-C(10)-C(11)-N(2)   | 108.3(3)  |
| C(12)-C(10)-C(11)-N(2)  | -127.0(3) |
| N(1)-C(10)-C(12)-C(14)  | 56.4(4)   |
| C(11)-C(10)-C(12)-C(14) | -65.1(3)  |
| N(1)-C(10)-C(12)-C(13)  | -64.9(3)  |
| C(11)-C(10)-C(12)-C(13) | 173.6(3)  |
| N(1)-C(10)-C(12)-C(15)  | 178.3(3)  |
| C(11)-C(10)-C(12)-C(15) | 56.8(3)   |
| C(11)-N(2)-C(16)-C(17)  | 169.4(3)  |
| C(11)-N(2)-C(16)-C(21)  | -10.2(5)  |
| C(21)-C(16)-C(17)-C(18) | -0.3(5)   |
| N(2)-C(16)-C(17)-C(18)  | -180.0(3) |
| C(16)-C(17)-C(18)-C(19) | -1.2(6)   |
| C(17)-C(18)-C(19)-C(20) | 2.1(6)    |
| C(17)-C(18)-C(19)-O(4)  | -179.2(3) |
| C(22)-O(4)-C(19)-C(20)  | -11.2(5)  |
| C(22)-O(4)-C(19)-C(18)  | 170.2(3)  |

|                         |           |
|-------------------------|-----------|
| C(18)-C(19)-C(20)-C(21) | -1.5(6)   |
| O(4)-C(19)-C(20)-C(21)  | 179.9(4)  |
| C(17)-C(16)-C(21)-C(20) | 0.9(6)    |
| N(2)-C(16)-C(21)-C(20)  | -179.5(4) |
| C(19)-C(20)-C(21)-C(16) | 0.0(7)    |
| C(29)-P(1)-C(23)-C(24)  | 84.0(3)   |
| C(3)-P(1)-C(23)-C(24)   | -25.2(3)  |
| Ag(1)-P(1)-C(23)-C(24)  | -147.4(2) |
| C(29)-P(1)-C(23)-C(28)  | -92.9(3)  |
| C(3)-P(1)-C(23)-C(28)   | 157.9(2)  |
| Ag(1)-P(1)-C(23)-C(28)  | 35.8(3)   |
| C(28)-C(23)-C(24)-C(25) | 1.1(5)    |
| P(1)-C(23)-C(24)-C(25)  | -175.8(3) |
| C(23)-C(24)-C(25)-C(26) | -0.1(6)   |
| C(24)-C(25)-C(26)-C(27) | 0.4(6)    |
| C(25)-C(26)-C(27)-C(28) | -1.5(6)   |
| C(24)-C(23)-C(28)-C(27) | -2.2(5)   |
| P(1)-C(23)-C(28)-C(27)  | 174.7(3)  |
| C(26)-C(27)-C(28)-C(23) | 2.4(5)    |
| C(23)-P(1)-C(29)-C(34)  | -30.4(3)  |
| C(3)-P(1)-C(29)-C(34)   | 80.0(3)   |
| Ag(1)-P(1)-C(29)-C(34)  | -162.7(2) |
| C(23)-P(1)-C(29)-C(30)  | 151.0(2)  |
| C(3)-P(1)-C(29)-C(30)   | -98.7(3)  |
| Ag(1)-P(1)-C(29)-C(30)  | 18.6(3)   |
| C(34)-C(29)-C(30)-C(31) | -0.8(5)   |
| P(1)-C(29)-C(30)-C(31)  | 177.9(3)  |
| C(29)-C(30)-C(31)-C(32) | 1.3(5)    |
| C(30)-C(31)-C(32)-C(33) | -1.6(5)   |
| C(31)-C(32)-C(33)-C(34) | 1.5(5)    |
| C(32)-C(33)-C(34)-C(29) | -1.0(5)   |
| C(30)-C(29)-C(34)-C(33) | 0.6(5)    |
| P(1)-C(29)-C(34)-C(33)  | -178.0(3) |
| C(55)-P(2)-C(35)-C(40)  | 7.5(3)    |
| C(61)-P(2)-C(35)-C(40)  | 116.7(2)  |
| Ag(1)-P(2)-C(35)-C(40)  | -118.4(2) |

|                         |           |
|-------------------------|-----------|
| C(55)-P(2)-C(35)-C(36)  | -174.6(2) |
| C(61)-P(2)-C(35)-C(36)  | -65.3(2)  |
| Ag(1)-P(2)-C(35)-C(36)  | 59.6(2)   |
| C(40)-C(35)-C(36)-C(37) | -4.8(4)   |
| P(2)-C(35)-C(36)-C(37)  | 177.2(2)  |
| C(40)-C(35)-C(36)-C(41) | 174.5(3)  |
| P(2)-C(35)-C(36)-C(41)  | -3.5(3)   |
| C(35)-C(36)-C(37)-C(38) | 3.3(4)    |
| C(41)-C(36)-C(37)-C(38) | -176.0(3) |
| C(36)-C(37)-C(38)-C(39) | 1.1(5)    |
| C(37)-C(38)-C(39)-C(40) | -3.9(5)   |
| C(36)-C(35)-C(40)-C(39) | 2.0(4)    |
| P(2)-C(35)-C(40)-C(39)  | 180.0(2)  |
| C(38)-C(39)-C(40)-C(35) | 2.4(5)    |
| C(42)-N(3)-C(41)-C(36)  | 178.2(3)  |
| C(37)-C(36)-C(41)-N(3)  | 2.6(4)    |
| C(35)-C(36)-C(41)-N(3)  | -176.7(3) |
| C(41)-N(3)-C(42)-C(43)  | -118.4(3) |
| C(41)-N(3)-C(42)-C(44)  | 115.8(3)  |
| C(48)-N(4)-C(43)-O(5)   | -7.5(5)   |
| C(48)-N(4)-C(43)-C(42)  | 171.1(3)  |
| N(3)-C(42)-C(43)-O(5)   | -67.3(4)  |
| C(44)-C(42)-C(43)-O(5)  | 57.4(5)   |
| N(3)-C(42)-C(43)-N(4)   | 114.1(3)  |
| C(44)-C(42)-C(43)-N(4)  | -121.2(3) |
| N(3)-C(42)-C(44)-C(45)  | 175.9(3)  |
| C(43)-C(42)-C(44)-C(45) | 53.4(4)   |
| N(3)-C(42)-C(44)-C(46)  | 52.1(4)   |
| C(43)-C(42)-C(44)-C(46) | -70.4(4)  |
| N(3)-C(42)-C(44)-C(47)  | -68.0(4)  |
| C(43)-C(42)-C(44)-C(47) | 169.5(3)  |
| C(43)-N(4)-C(48)-C(49)  | -141.3(3) |
| C(43)-N(4)-C(48)-C(53)  | 38.8(5)   |
| C(53)-C(48)-C(49)-C(50) | -1.9(6)   |
| N(4)-C(48)-C(49)-C(50)  | 178.2(3)  |
| C(48)-C(49)-C(50)-C(51) | 1.0(6)    |



|                         |           |
|-------------------------|-----------|
| C(54)-O(6)-C(51)-C(52)  | -171.6(4) |
| C(54)-O(6)-C(51)-C(50)  | 9.0(6)    |
| C(49)-C(50)-C(51)-O(6)  | -179.5(4) |
| C(49)-C(50)-C(51)-C(52) | 1.1(6)    |
| O(6)-C(51)-C(52)-C(53)  | 178.1(4)  |
| C(50)-C(51)-C(52)-C(53) | -2.4(6)   |
| C(51)-C(52)-C(53)-C(48) | 1.6(6)    |
| C(49)-C(48)-C(53)-C(52) | 0.6(5)    |
| N(4)-C(48)-C(53)-C(52)  | -179.5(3) |
| C(35)-P(2)-C(55)-C(56)  | 75.4(3)   |
| C(61)-P(2)-C(55)-C(56)  | -32.0(3)  |
| Ag(1)-P(2)-C(55)-C(56)  | -160.8(3) |
| C(35)-P(2)-C(55)-C(60)  | -104.4(3) |
| C(61)-P(2)-C(55)-C(60)  | 148.1(3)  |
| Ag(1)-P(2)-C(55)-C(60)  | 19.3(3)   |
| C(60)-C(55)-C(56)-C(57) | 0.0(5)    |
| P(2)-C(55)-C(56)-C(57)  | -179.8(3) |
| C(55)-C(56)-C(57)-C(58) | 0.9(6)    |
| C(56)-C(57)-C(58)-C(59) | -2.1(7)   |
| C(57)-C(58)-C(59)-C(60) | 2.4(7)    |
| C(58)-C(59)-C(60)-C(55) | -1.4(7)   |
| C(56)-C(55)-C(60)-C(59) | 0.2(6)    |
| P(2)-C(55)-C(60)-C(59)  | -180.0(3) |
| C(55)-P(2)-C(61)-C(62)  | 83.8(3)   |
| C(35)-P(2)-C(61)-C(62)  | -24.9(3)  |
| Ag(1)-P(2)-C(61)-C(62)  | -147.5(2) |
| C(55)-P(2)-C(61)-C(66)  | -97.4(2)  |
| C(35)-P(2)-C(61)-C(66)  | 154.0(2)  |
| Ag(1)-P(2)-C(61)-C(66)  | 31.3(3)   |
| C(66)-C(61)-C(62)-C(63) | 0.5(5)    |
| P(2)-C(61)-C(62)-C(63)  | 179.3(3)  |
| C(61)-C(62)-C(63)-C(64) | -0.2(6)   |
| C(62)-C(63)-C(64)-C(65) | -0.3(6)   |
| C(63)-C(64)-C(65)-C(66) | 0.6(6)    |
| C(62)-C(61)-C(66)-C(65) | -0.2(5)   |
| P(2)-C(61)-C(66)-C(65)  | -179.1(3) |

|                         |            |
|-------------------------|------------|
| C(64)-C(65)-C(66)-C(61) | -0.4(5)    |
| C(3S)-O(1S)-C(2S)-C(1S) | -177.3(10) |
| C(2S)-O(1S)-C(3S)-C(4S) | 175.0(12)  |

---

Symmetry transformations used to generate equivalent atoms:

**Table 7.** Hydrogen bonds for bc106 [ $\text{\AA}$  and  $^\circ$ ]

| D-H...A          | d(D-H) | d(H...A) | d(D...A) | $\angle(\text{DHA})$ |
|------------------|--------|----------|----------|----------------------|
| N(2)-H(2)...O(2) | 0.88   | 2.14     | 2.958(3) | 155.2                |
| N(4)-H(4)...O(1) | 0.88   | 2.02     | 2.897(3) | 173.4                |

---

Symmetry transformations used to generate equivalent atoms:

■ X-ray crystal structure of 17:

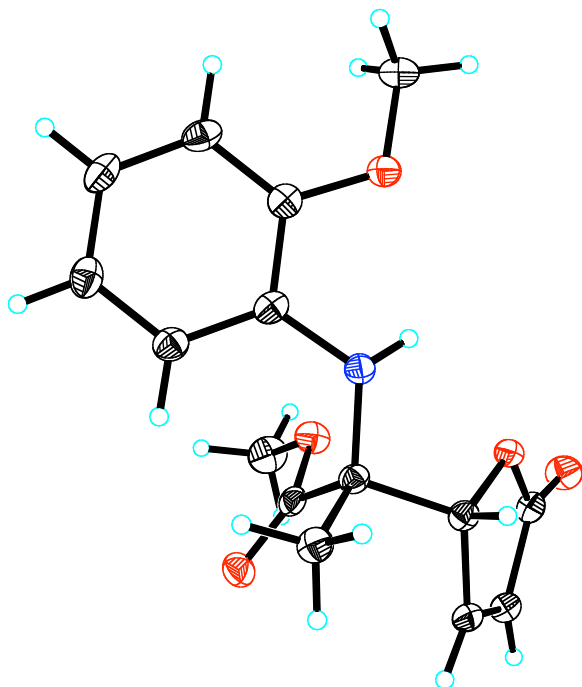

**Table 1.** Crystal data and structure refinement for **17**

|                                 |                                                  |          |
|---------------------------------|--------------------------------------------------|----------|
| Identification code             | d08002                                           |          |
| Empirical formula               | C <sub>15</sub> H <sub>17</sub> N O <sub>5</sub> |          |
| Formula weight                  | 291.30                                           |          |
| Temperature                     | 100(2) K                                         |          |
| Wavelength                      | 1.54178 Å                                        |          |
| Crystal system                  | Orthorhombic                                     |          |
| Space group                     | P2(1)2(1)2(1)                                    |          |
| Unit cell dimensions            | a = 6.4323(2) Å                                  | α = 90°. |
|                                 | b = 9.5882(2) Å                                  | β = 90°. |
|                                 | c = 23.5349(6) Å                                 | γ = 90°. |
| Volume                          | 1451.50(7) Å <sup>3</sup>                        |          |
| Z                               | 4                                                |          |
| Density (calculated)            | 1.333 Mg/m <sup>3</sup>                          |          |
| Absorption coefficient          | 0.841 mm <sup>-1</sup>                           |          |
| F(000)                          | 616                                              |          |
| Crystal size                    | 0.45 x 0.15 x 0.15 mm <sup>3</sup>               |          |
| Theta range for data collection | 3.76 to 67.56°.                                  |          |

|                                   |                                             |
|-----------------------------------|---------------------------------------------|
| Index ranges                      | -7<=h<=7, -11<=k<=10, -27<=l<=28            |
| Reflections collected             | 19525                                       |
| Independent reflections           | 2610 [R(int) = 0.0193]                      |
| Completeness to theta = 67.56°    | 99.9 %                                      |
| Absorption correction             | Semi-empirical from equivalents             |
| Max. and min. transmission        | 0.8842 and 0.7033                           |
| Refinement method                 | Full-matrix least-squares on F <sup>2</sup> |
| Data / restraints / parameters    | 2610 / 1 / 196                              |
| Goodness-of-fit on F <sup>2</sup> | 1.049                                       |
| Final R indices [I>2sigma(I)]     | R1 = 0.0241, wR2 = 0.0628                   |
| R indices (all data)              | R1 = 0.0242, wR2 = 0.0629                   |
| Absolute structure parameter      | 0.05(12)                                    |
| Largest diff. peak and hole       | 0.169 and -0.161 e.Å <sup>-3</sup>          |

Table 2. Atomic coordinates ( $\times 10^4$ ) and equivalent isotropic displacement parameters ( $\text{\AA}^2 \times 10^3$ ) for d08002.  $U(\text{eq})$  is defined as one third of the trace of the orthogonalized  $U^{ij}$  tensor.

|       | x       | y        | z       | U(eq) |
|-------|---------|----------|---------|-------|
| O(3)  | 4092(1) | -1303(1) | 7898(1) | 18(1) |
| O(1)  | 2313(1) | 2902(1)  | 8285(1) | 20(1) |
| O(5)  | 4054(1) | -901(1)  | 9116(1) | 21(1) |
| O(4)  | 7338(1) | -1421(1) | 9365(1) | 24(1) |
| N(1)  | 5459(2) | 1152(1)  | 8400(1) | 17(1) |
| O(2)  | 1862(1) | -3095(1) | 7901(1) | 26(1) |
| C(12) | 3621(2) | -2681(1) | 7951(1) | 19(1) |
| C(7)  | 5166(2) | 2147(1)  | 8830(1) | 18(1) |
| C(8)  | 6711(2) | -100(1)  | 8497(1) | 16(1) |
| C(13) | 6112(2) | -874(1)  | 9050(1) | 17(1) |
| C(1)  | 382(2)  | 3648(1)  | 8255(1) | 23(1) |
| C(9)  | 6288(2) | -1105(1) | 7992(1) | 17(1) |
| C(10) | 7104(2) | -2554(1) | 8083(1) | 19(1) |
| C(15) | 9056(2) | 195(1)   | 8480(1) | 21(1) |
| C(6)  | 6396(2) | 2269(1)  | 9315(1) | 21(1) |
| C(11) | 5545(2) | -3451(1) | 8066(1) | 20(1) |
| C(5)  | 6074(2) | 3336(1)  | 9707(1) | 24(1) |
| C(2)  | 3515(2) | 3111(1)  | 8761(1) | 18(1) |
| C(4)  | 4491(2) | 4286(1)  | 9626(1) | 25(1) |
| C(3)  | 3201(2) | 4167(1)  | 9153(1) | 22(1) |
| C(14) | 3306(2) | -1668(1) | 9606(1) | 29(1) |

Table 3. Bond lengths [ $\text{\AA}$ ] and angles [ $^\circ$ ] for d08002

|              |            |
|--------------|------------|
| O(3)-C(12)   | 1.3613(15) |
| O(3)-C(9)    | 1.4421(14) |
| O(1)-C(2)    | 1.3761(14) |
| O(1)-C(1)    | 1.4347(15) |
| O(5)-C(13)   | 1.3327(15) |
| O(5)-C(14)   | 1.4496(15) |
| O(4)-C(13)   | 1.2025(15) |
| N(1)-C(7)    | 1.4029(15) |
| N(1)-C(8)    | 1.4634(15) |
| N(1)-H(1)    | 0.870(13)  |
| O(2)-C(12)   | 1.2053(15) |
| C(12)-C(11)  | 1.4664(17) |
| C(7)-C(6)    | 1.3939(17) |
| C(7)-C(2)    | 1.4172(17) |
| C(8)-C(15)   | 1.5356(16) |
| C(8)-C(13)   | 1.5479(15) |
| C(8)-C(9)    | 1.5535(15) |
| C(1)-H(1A)   | 0.9800     |
| C(1)-H(1B)   | 0.9800     |
| C(1)-H(1C)   | 0.9800     |
| C(9)-C(10)   | 1.5007(16) |
| C(9)-H(9)    | 1.0000     |
| C(10)-C(11)  | 1.3212(18) |
| C(10)-H(10)  | 0.9500     |
| C(15)-H(15A) | 0.9800     |
| C(15)-H(15B) | 0.9800     |
| C(15)-H(15C) | 0.9800     |
| C(6)-C(5)    | 1.3941(17) |
| C(6)-H(6)    | 0.9500     |
| C(11)-H(11)  | 0.9500     |
| C(5)-C(4)    | 1.3791(19) |
| C(5)-H(5)    | 0.9500     |
| C(2)-C(3)    | 1.3842(17) |
| C(4)-C(3)    | 1.3946(19) |
| C(4)-H(4)    | 0.9500     |

|                  |            |
|------------------|------------|
| C(3)-H(3)        | 0.9500     |
| C(14)-H(14A)     | 0.9800     |
| C(14)-H(14B)     | 0.9800     |
| C(14)-H(14C)     | 0.9800     |
|                  |            |
| C(12)-O(3)-C(9)  | 109.37(9)  |
| C(2)-O(1)-C(1)   | 116.94(9)  |
| C(13)-O(5)-C(14) | 115.63(10) |
| C(7)-N(1)-C(8)   | 121.29(9)  |
| C(7)-N(1)-H(1)   | 110.5(10)  |
| C(8)-N(1)-H(1)   | 114.7(10)  |
| O(2)-C(12)-O(3)  | 121.34(11) |
| O(2)-C(12)-C(11) | 130.13(12) |
| O(3)-C(12)-C(11) | 108.53(10) |
| C(6)-C(7)-N(1)   | 124.84(11) |
| C(6)-C(7)-C(2)   | 117.67(10) |
| N(1)-C(7)-C(2)   | 117.48(10) |
| N(1)-C(8)-C(15)  | 112.67(10) |
| N(1)-C(8)-C(13)  | 112.80(9)  |
| C(15)-C(8)-C(13) | 110.77(10) |
| N(1)-C(8)-C(9)   | 107.08(9)  |
| C(15)-C(8)-C(9)  | 105.44(9)  |
| C(13)-C(8)-C(9)  | 107.60(9)  |
| O(4)-C(13)-O(5)  | 124.80(11) |
| O(4)-C(13)-C(8)  | 124.38(11) |
| O(5)-C(13)-C(8)  | 110.77(10) |
| O(1)-C(1)-H(1A)  | 109.5      |
| O(1)-C(1)-H(1B)  | 109.5      |
| H(1A)-C(1)-H(1B) | 109.5      |
| O(1)-C(1)-H(1C)  | 109.5      |
| H(1A)-C(1)-H(1C) | 109.5      |
| H(1B)-C(1)-H(1C) | 109.5      |
| O(3)-C(9)-C(10)  | 104.03(9)  |
| O(3)-C(9)-C(8)   | 111.72(9)  |
| C(10)-C(9)-C(8)  | 113.84(9)  |
| O(3)-C(9)-H(9)   | 109.0      |

|                     |            |
|---------------------|------------|
| C(10)-C(9)-H(9)     | 109.0      |
| C(8)-C(9)-H(9)      | 109.0      |
| C(11)-C(10)-C(9)    | 109.46(11) |
| C(11)-C(10)-H(10)   | 125.3      |
| C(9)-C(10)-H(10)    | 125.3      |
| C(8)-C(15)-H(15A)   | 109.5      |
| C(8)-C(15)-H(15B)   | 109.5      |
| H(15A)-C(15)-H(15B) | 109.5      |
| C(8)-C(15)-H(15C)   | 109.5      |
| H(15A)-C(15)-H(15C) | 109.5      |
| H(15B)-C(15)-H(15C) | 109.5      |
| C(7)-C(6)-C(5)      | 121.35(12) |
| C(7)-C(6)-H(6)      | 119.3      |
| C(5)-C(6)-H(6)      | 119.3      |
| C(10)-C(11)-C(12)   | 108.55(11) |
| C(10)-C(11)-H(11)   | 125.7      |
| C(12)-C(11)-H(11)   | 125.7      |
| C(4)-C(5)-C(6)      | 120.16(12) |
| C(4)-C(5)-H(5)      | 119.9      |
| C(6)-C(5)-H(5)      | 119.9      |
| O(1)-C(2)-C(3)      | 124.55(11) |
| O(1)-C(2)-C(7)      | 114.80(10) |
| C(3)-C(2)-C(7)      | 120.66(11) |
| C(5)-C(4)-C(3)      | 119.73(11) |
| C(5)-C(4)-H(4)      | 120.1      |
| C(3)-C(4)-H(4)      | 120.1      |
| C(2)-C(3)-C(4)      | 120.38(11) |
| C(2)-C(3)-H(3)      | 119.8      |
| C(4)-C(3)-H(3)      | 119.8      |
| O(5)-C(14)-H(14A)   | 109.5      |
| O(5)-C(14)-H(14B)   | 109.5      |
| H(14A)-C(14)-H(14B) | 109.5      |
| O(5)-C(14)-H(14C)   | 109.5      |
| H(14A)-C(14)-H(14C) | 109.5      |
| H(14B)-C(14)-H(14C) | 109.5      |

---

Symmetry transformations used to generate equivalent atoms:



Table 4. Anisotropic displacement parameters ( $\text{\AA}^2 \times 10^3$ ) for d08002. The anisotropic displacement factor exponent takes the form:  $-2\pi^2 [ h^2 a^*^2 U^{11} + \dots + 2 h k a^* b^* U^{12} ]$

|       | $U^{11}$ | $U^{22}$ | $U^{33}$ | $U^{23}$ | $U^{13}$ | $U^{12}$ |
|-------|----------|----------|----------|----------|----------|----------|
| O(3)  | 16(1)    | 18(1)    | 19(1)    | -1(1)    | -2(1)    | 2(1)     |
| O(1)  | 20(1)    | 20(1)    | 21(1)    | 0(1)     | 0(1)     | 3(1)     |
| O(5)  | 22(1)    | 22(1)    | 20(1)    | 6(1)     | 4(1)     | 0(1)     |
| O(4)  | 29(1)    | 21(1)    | 21(1)    | 2(1)     | -5(1)    | 2(1)     |
| N(1)  | 19(1)    | 16(1)    | 17(1)    | 0(1)     | -1(1)    | 0(1)     |
| O(2)  | 17(1)    | 27(1)    | 33(1)    | -2(1)    | 0(1)     | -3(1)    |
| C(12) | 20(1)    | 19(1)    | 17(1)    | -2(1)    | 2(1)     | 0(1)     |
| C(7)  | 21(1)    | 13(1)    | 18(1)    | 2(1)     | 5(1)     | -2(1)    |
| C(8)  | 18(1)    | 14(1)    | 17(1)    | 0(1)     | 1(1)     | 0(1)     |
| C(13) | 22(1)    | 13(1)    | 16(1)    | -3(1)    | -1(1)    | 0(1)     |
| C(1)  | 21(1)    | 20(1)    | 30(1)    | 3(1)     | 2(1)     | 3(1)     |
| C(9)  | 15(1)    | 18(1)    | 17(1)    | -1(1)    | 2(1)     | -1(1)    |
| C(10) | 17(1)    | 20(1)    | 19(1)    | -3(1)    | 1(1)     | 3(1)     |
| C(15) | 19(1)    | 20(1)    | 24(1)    | -2(1)    | 1(1)     | -2(1)    |
| C(6)  | 24(1)    | 17(1)    | 21(1)    | 2(1)     | 2(1)     | 0(1)     |
| C(11) | 21(1)    | 18(1)    | 21(1)    | -2(1)    | 0(1)     | 2(1)     |
| C(5)  | 31(1)    | 21(1)    | 19(1)    | 0(1)     | 0(1)     | -5(1)    |
| C(2)  | 20(1)    | 17(1)    | 18(1)    | 3(1)     | 4(1)     | -3(1)    |
| C(4)  | 35(1)    | 18(1)    | 21(1)    | -4(1)    | 6(1)     | -2(1)    |
| C(3)  | 26(1)    | 16(1)    | 24(1)    | 2(1)     | 7(1)     | 2(1)     |
| C(14) | 35(1)    | 27(1)    | 24(1)    | 7(1)     | 9(1)     | 0(1)     |

Table 5. Hydrogen coordinates ( $\times 10^4$ ) and isotropic displacement parameters ( $\text{\AA}^2 \times 10^3$ ) for d08002.

|        | x        | y        | z       | U(eq) |
|--------|----------|----------|---------|-------|
| H(1)   | 4300(20) | 1010(15) | 8216(6) | 20    |
| H(1A)  | 661      | 4648     | 8217    | 35    |
| H(1B)  | -419     | 3480     | 8603    | 35    |
| H(1C)  | -416     | 3324     | 7926    | 35    |
| H(9)   | 6928     | -709     | 7640    | 20    |
| H(10)  | 8520     | -2790    | 8144    | 22    |
| H(15A) | 9426     | 830      | 8790    | 31    |
| H(15B) | 9418     | 626      | 8115    | 31    |
| H(15C) | 9822     | -682     | 8523    | 31    |
| H(6)   | 7475     | 1611     | 9379    | 25    |
| H(11)  | 5653     | -4431    | 8119    | 24    |
| H(5)   | 6948     | 3410     | 10032   | 28    |
| H(4)   | 4281     | 5018     | 9892    | 30    |
| H(3)   | 2100     | 4813     | 9099    | 27    |
| H(14A) | 3770     | -1203    | 9955    | 43    |
| H(14B) | 3857     | -2620    | 9596    | 43    |
| H(14C) | 1783     | -1699    | 9599    | 43    |

Table 6. Torsion angles [°] for d08002.

---

|                        |             |
|------------------------|-------------|
| C(9)-O(3)-C(12)-O(2)   | 178.67(11)  |
| C(9)-O(3)-C(12)-C(11)  | -1.85(12)   |
| C(8)-N(1)-C(7)-C(6)    | 17.83(17)   |
| C(8)-N(1)-C(7)-C(2)    | -163.14(10) |
| C(7)-N(1)-C(8)-C(15)   | -77.21(13)  |
| C(7)-N(1)-C(8)-C(13)   | 49.13(14)   |
| C(7)-N(1)-C(8)-C(9)    | 167.31(10)  |
| C(14)-O(5)-C(13)-O(4)  | -0.54(17)   |
| C(14)-O(5)-C(13)-C(8)  | 176.79(9)   |
| N(1)-C(8)-C(13)-O(4)   | -141.54(11) |
| C(15)-C(8)-C(13)-O(4)  | -14.19(16)  |
| C(9)-C(8)-C(13)-O(4)   | 100.58(13)  |
| N(1)-C(8)-C(13)-O(5)   | 41.11(13)   |
| C(15)-C(8)-C(13)-O(5)  | 168.46(9)   |
| C(9)-C(8)-C(13)-O(5)   | -76.77(11)  |
| C(12)-O(3)-C(9)-C(10)  | 2.47(11)    |
| C(12)-O(3)-C(9)-C(8)   | -120.75(10) |
| N(1)-C(8)-C(9)-O(3)    | -50.61(12)  |
| C(15)-C(8)-C(9)-O(3)   | -170.82(9)  |
| C(13)-C(8)-C(9)-O(3)   | 70.91(12)   |
| N(1)-C(8)-C(9)-C(10)   | -168.07(9)  |
| C(15)-C(8)-C(9)-C(10)  | 71.71(12)   |
| C(13)-C(8)-C(9)-C(10)  | -46.56(12)  |
| O(3)-C(9)-C(10)-C(11)  | -2.26(12)   |
| C(8)-C(9)-C(10)-C(11)  | 119.57(11)  |
| N(1)-C(7)-C(6)-C(5)    | 176.36(11)  |
| C(2)-C(7)-C(6)-C(5)    | -2.67(17)   |
| C(9)-C(10)-C(11)-C(12) | 1.21(13)    |
| O(2)-C(12)-C(11)-C(10) | 179.79(13)  |
| O(3)-C(12)-C(11)-C(10) | 0.37(13)    |
| C(7)-C(6)-C(5)-C(4)    | 1.18(19)    |
| C(1)-O(1)-C(2)-C(3)    | -12.97(16)  |
| C(1)-O(1)-C(2)-C(7)    | 167.18(10)  |
| C(6)-C(7)-C(2)-O(1)    | -177.66(10) |

|                     |             |
|---------------------|-------------|
| N(1)-C(7)-C(2)-O(1) | 3.24(15)    |
| C(6)-C(7)-C(2)-C(3) | 2.49(17)    |
| N(1)-C(7)-C(2)-C(3) | -176.61(10) |
| C(6)-C(5)-C(4)-C(3) | 0.58(19)    |
| O(1)-C(2)-C(3)-C(4) | 179.33(11)  |
| C(7)-C(2)-C(3)-C(4) | -0.83(18)   |
| C(5)-C(4)-C(3)-C(2) | -0.74(18)   |

---

Symmetry transformations used to generate equivalent atoms:

Table 7. Hydrogen bonds for d08002 [ $\text{\AA}$  and  $^\circ$ ].

| D-H...A          | d(D-H)    | d(H...A)  | d(D...A)   | $\angle(\text{DHA})$ |
|------------------|-----------|-----------|------------|----------------------|
| N(1)-H(1)...O(3) | 0.870(13) | 2.344(15) | 2.7764(13) | 110.9(11)            |

Symmetry transformations used to generate equivalent atoms:
